# Supplementary material for: Cation-controlled chemoselective synthesis of N-aroylureas and imides via amidation of N-Boc arylamides
Source: Royal Society of Chemistry journal article supplement (doi:10.1039/d3qo00352c), 2023-01-01

## Supporting Information

### Chemoselective synthesis of *N*-aroylureas and imides *via* selective amidation of Boc and amide groups of *N*-*R*-*N*-Boc arylamides

Jiamin Wang,<sup>1,3,4+</sup> Sujuan Shuai,<sup>1,3,4+</sup> Lishe Gan,<sup>4,5,+</sup> Yongxin Luo,<sup>5</sup> Huimin Jin<sup>3,4</sup>  
Lingfeng Chen,<sup>1</sup> Dong Zou,<sup>3,4</sup> Guang Liang<sup>\*,1</sup> Patrick J. Walsh<sup>\*,2</sup> and Jie Li,<sup>\*,1,3,4</sup>

<sup>1</sup> School of Pharmaceutical Sciences, Hangzhou Medical College, Hangzhou, Zhejiang 311399, China

E-mail: lijie@zucc.edu.cn; cui liang1234@163.com

<sup>2</sup> Roy and Diana Vagelos Laboratories, Penn/Merck Laboratory for High-Throughput Experimentation, University of Pennsylvania, Department of Chemistry, 231 South 34th Street, Philadelphia, Pennsylvania 19104, USA.

E-mail: pwalsh@sas.upenn.edu

<sup>3</sup> College of Pharmaceutical Sciences, Zhejiang University, Hangzhou 310058, P. R. China

<sup>4</sup> Department of Pharmacy, School of Medicine, Zhejiang University City College, No. 48, Huzhou Road, Hangzhou 310015, P. R. China

<sup>5</sup> School of Biotechnology and Health Sciences, Wuyi University, Jiangmen, Guangdong 529020, People's Republic of China.

#### Table of Content

|                                         |            |
|-----------------------------------------|------------|
| <b>General Information</b>              | <b>S2</b>  |
| <b>Synthesis of Starting material</b>   | <b>S2</b>  |
| <b>Synthesis of <i>N</i>-aroylureas</b> | <b>S3</b>  |
| <b>Synthesis of Imides</b>              | <b>S3</b>  |
| <b>Computational details</b>            | <b>S29</b> |
| <b>References</b>                       | <b>S69</b> |
| <b>NMR Spectra</b>                      | <b>S71</b> |

## General Information

All reactions were conducted under an atmosphere of dry nitrogen with oven-dried glassware or vacuum line techniques. All anhydrous solvents were purchased from Sigma-Aldrich and directly used without further purification. Unless otherwise stated, reagents were commercially available and used as purchased without further purification. Chemicals were purchased from Sigma-Aldrich, TCI China, Acros, Alfa Aesar or J&K.

Progress of reactions was monitored by thin-layer chromatography using TLC plates and visualized by short-wave ultraviolet light. Flash chromatography was performed with Qingdao Haiyang flash silica gel (200–300 mesh). The NMR spectra were obtained using a Bruker AVANCE III 500 MHz spectrometer with TMS as the internal standard. The infrared spectra were obtained with KBr plates by using an FTIR650 FT-IR Spectrometer. High resolution mass spectrometry (HRMS) data were obtained on an Agilent Q-TOF 1290 LC/6224 MS system using electrospray ionization (ESI) in positive or negative mode. Melting points were determined on a Thermal Values analytical microscope and were uncorrected.

## Synthesis of Starting material

### General Procedure A

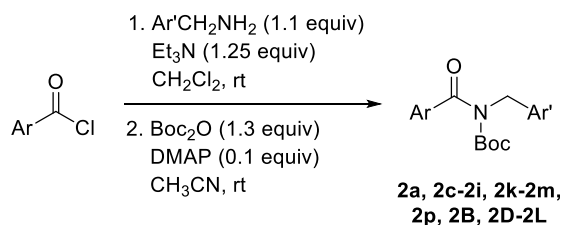

*N*-*R*-*N*-Boc arylamides **2a**, **2c-2i**, **2k-2m**, **2p**, **2b'**, **2d'-2l'** used in this study have been prepared according to the literature procedures.<sup>1</sup> Arylmethylamine (11 mmol, 1.1 equiv) and Et<sub>3</sub>N (1.730 mL, 12.5 mmol, 1.25 equiv) was added dropwise to arylformyl chloride (10 mmol, 1.0 equiv) in CH<sub>2</sub>Cl<sub>2</sub> (15 mL) successively under nitrogen atmosphere, and the reaction was left to stir at room temperature for 2 h. Reaction mixture was extracted with EtOAc (3 × 25 mL), and the combined organic extracts were washed successively with 1.0 M HCl (70 mL) and brine (70 mL). The organic layer was dried over Na<sub>2</sub>SO<sub>4</sub> and concentrated under reduced pressure. The resulting crude solid material was used in the subsequent step without further purification.

To a flask containing the crude material from the previous step was added DMAP (122.2 mg, 1 mmol, 0.1 equiv) in anhydrous CH<sub>3</sub>CN (10 mL) under nitrogen atmosphere. Boc<sub>2</sub>O (2.70 g, 13 mmol, 1.3 equiv) was added in one portion and the reaction was allowed to stir at room temperature for 16 h. The reaction

was quenched by addition of 20 mL saturated aqueous NaHCO<sub>3</sub> and extracted with EtOAc (3 × 25 mL). The combined organic extracts were dried over Na<sub>2</sub>SO<sub>4</sub>, filtered and concentrated. The crude material was loaded onto a silica gel column and purified by flash chromatography.

Compounds **1a-1n**, **1f'**, **1n'**, **2b**, **2j**, **2n**, **2o** and **2c'** were commercially available. The NMR data for other amides are given in the section below.

### Synthesis of *N*-aroylureas

#### General Procedure B

An oven-dried 10 mL vial equipped with a stir bar was charged with *N*-*R*-*N*-Boc benzamides **2** (0.1 mmol, 1.0 equiv) and KO<sup>t</sup>Bu (33.7 mg, 0.3 mmol, 3.0 equiv) under a nitrogen atmosphere. A solution of benzamide (12.1 mg, 0.1 mmol, 1.0 equiv) in 1 mL of dry DME was added to the reaction by syringe at room temperature. The colorless mixture turned to white suspension. The vial was capped, removed from the glovebox, and stirred for 12 h at 100 °C in an oil bath. After cooling to room temperature, the reaction mixture was quenched with three drops of H<sub>2</sub>O, passed through a short pad of silica gel and eluted with ethyl acetate (1 mL × 3). The combined organic solution was concentrated under reduced pressure. The crude material was loaded onto a silica gel column and purified by flash chromatography.

### Synthesis of imides

#### General Procedure C

An oven-dried 10 mL vial equipped with a stir bar was charged with *N*-*Bn*-*N*-Boc arylamides (0.1 mmol, 1.0 equiv) and LiOH (7.2 mg, 0.3 mmol, 3.0 equiv) under a nitrogen atmosphere. A solution of benzamide (12.1 mg, 0.1 mmol, 1.0 equiv) in 1 mL of dry DME was added to the reaction by syringe at room temperature. The mixture turned to colorless. The vial was capped, removed from the glovebox, and stirred for 12 h at 100 °C in an oil bath. After cooling to room temperature, the reaction mixture was quenched with three drops of H<sub>2</sub>O, passed through a short pad of silica gel and eluted with ethyl acetate (1 mL × 3). The combined organic solution was concentrated under reduced pressure. The crude material was loaded onto a silica gel column and purified by flash chromatography.

### Characterization Data for Starting Materials

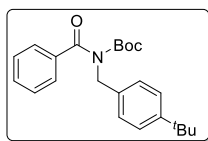

**tert-Butyl benzoyl(4-(tert-butyl)benzyl)carbamate (2a).** The reaction was performed following General Procedure A with benzoyl chloride (1.160 mL, 10 mmol), 4-tert-butylbenzylamine (1.937 mL, 11 mmol) and Boc<sub>2</sub>O (2.70 g, 13 mmol, 1.3 equiv). The crude material was purified by flash chromatography on silica gel (eluted with hexanes:EtOAc = 20:1) to give the product (2.94 g, 80% yield) as a white solid. <sup>1</sup>H NMR (500 MHz, CDCl<sub>3</sub>): δ 7.54 – 7.49 (m, 2H), 7.49 – 7.43 (m, 1H), 7.41 – 7.37 (m, 2H), 7.37 – 7.33 (m, 4H), 4.96 (s, 2H), 1.31 (s, 9H), 1.13 (s, 9H); <sup>13</sup>C{<sup>1</sup>H} NMR (125 MHz, CDCl<sub>3</sub>): δ 173.2, 153.7, 150.3, 138.0, 134.9, 131.1, 128.2, 128.0, 127.6, 125.5, 83.2, 48.7, 34.6, 31.5, 27.5; IR (thin film): 2964, 1731, 1677, 1368, 1229, 1144, 853, 725, 697 cm<sup>-1</sup>; HRMS (ESI) m/z: [M + Na]<sup>+</sup> calcd for C<sub>23</sub>H<sub>29</sub>NNaO<sub>3</sub> 390.2040; found 390.2036.

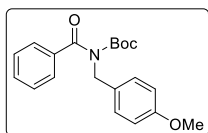

**tert-Butyl benzoyl(4-methoxybenzyl)carbamate (2c).** The reaction was performed following General Procedure A with benzoyl chloride (1.160 mL, 10 mmol), 4-Methoxybenzylamine (1.437 mL, 11 mmol) and Boc<sub>2</sub>O (2.70 g, 13 mmol, 1.3 equiv). The crude material was purified by flash chromatography on silica gel (eluted with hexanes:EtOAc = 8:1) to give the product (2.32 g, 68% yield) as a white solid. <sup>1</sup>H NMR (500 MHz, CDCl<sub>3</sub>): δ 7.50 – 7.47 (m, 2H), 7.47 – 7.43 (m, 1H), 7.42 – 7.33 (m, 4H), 6.90 – 6.82 (m, 2H), 4.92 (s, 2H), 3.79 (s, 3H), 1.12 (s, 9H); <sup>13</sup>C NMR (125 MHz, CDCl<sub>3</sub>) δ 173.2, 159.0, 153.6, 137.9, 131.1, 130.1, 129.9, 128.1, 127.5, 113.9, 83.1, 55.3, 48.4, 27.4. The NMR spectral data match the previously published data.<sup>2</sup>

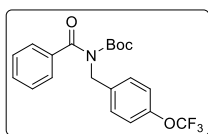

**tert-Butyl benzoyl(4-(trifluoromethoxy)benzyl)carbamate (2d).** The reaction was performed following General Procedure A with benzoyl chloride (1.160 mL, 10 mmol), [4-(trifluoromethoxy)phenyl]methanamine (1.679 mL, 11 mmol) and Boc<sub>2</sub>O (2.70 g, 13 mmol, 1.3 equiv). The crude material was purified by flash chromatography on silica gel (eluted with hexanes:EtOAc = 8:1) to give the product (2.13 g, 54% yield) as a colorless liquid. <sup>1</sup>H NMR (500 MHz, CDCl<sub>3</sub>): δ 7.54 – 7.44 (m, 5H), 7.42 – 7.36 (m, 2H), 7.35 – 7.13 (m, 2H), 4.98 (s, 2H), 1.12 (s, 9H); <sup>13</sup>C{<sup>1</sup>H} NMR (125 MHz, CDCl<sub>3</sub>): δ 173.2, 153.4, 148.7 (q, *J*<sub>C-F</sub> = 1.3 Hz), 137.6, 136.7, 131.3, 129.9, 128.2, 127.6, 120.6 (q, *J*<sub>C-F</sub> = 257.0 Hz), 121.1, 83.2, 48.2, 27.4; IR (thin film): 2980, 2934, 1732, 1674, 1368, 1344, 1256, 1159, 851, 696 cm<sup>-1</sup>; HRMS (ESI) m/z: [M + Na]<sup>+</sup> calcd for C<sub>20</sub>H<sub>20</sub>F<sub>3</sub>NNaO<sub>4</sub> 418.1237; found 418.1220.

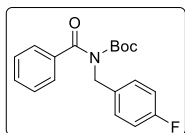

**tert-Butyl benzoyl(4-fluorobenzyl)carbamate (2e).** The reaction was performed following General Procedure A with benzoyl chloride (1.160 mL, 10 mmol), 4-fluorobenzylamine (1.250 mL, 11 mmol) and Boc<sub>2</sub>O (2.70 g, 13 mmol, 1.3 equiv).

The crude material was purified by flash chromatography on silica gel (eluted with hexanes:EtOAc = 20:1) to give the product (2.53 g, 77% yield) as a white solid. <sup>1</sup>H NMR (500 MHz, CDCl<sub>3</sub>): δ 7.51 – 7.48 (m, 2H), 7.47 – 7.41 (m, 3H), 7.40 – 7.36 (m, 2H), 7.05 – 6.98 (m, 2H), 4.95 (s, 2H), 1.12 (s, 9H); <sup>13</sup>C{<sup>1</sup>H} NMR (125 MHz, CDCl<sub>3</sub>): δ 173.2, 162.3 (d, *J*<sub>C-F</sub> = 245.5 Hz), 153.5, 137.8, 133.8 (d, *J*<sub>C-F</sub> = 3.2 Hz), 131.2, 130.3 (d, *J*<sub>C-F</sub> = 8.1 Hz), 128.2, 127.5, 115.4 (d, *J*<sub>C-F</sub> = 21.4 Hz), 83.4, 48.3, 27.4; IR (thin film): 2980, 2935, 1731, 1674, 1369, 1344, 1227, 1142, 852 cm<sup>-1</sup>; HRMS (ESI) m/z: [M + Na]<sup>+</sup> calcd for C<sub>19</sub>H<sub>20</sub>FNNaO<sub>3</sub> 352.1319; found 352.1333.

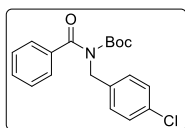

**tert-Butyl benzoyl(4-chlorobenzyl)carbamate (2f).** The reaction was performed following General Procedure A with benzoyl chloride (1.160 mL, 10 mmol), 4-chlorobenzylamine (1.335 mL, 11 mmol) and Boc<sub>2</sub>O (2.70 g, 13 mmol, 1.3 equiv).

The crude material was purified by flash chromatography on silica gel (eluted with hexanes:EtOAc = 20:1) to give the product (2.59 g, 75% yield) as a white solid. <sup>1</sup>H NMR (500 MHz, CDCl<sub>3</sub>): δ 7.52 – 7.48 (m, 2H), 7.48 – 7.44 (m, 1H), 7.41 – 7.36 (m, 4H), 7.34 – 7.27 (m, 2H), 4.94 (s, 2H), 1.12 (s, 9H); <sup>13</sup>C{<sup>1</sup>H} NMR (125 MHz, CDCl<sub>3</sub>): δ 173.1, 153.4, 137.7, 136.5, 133.4, 131.3, 129.9, 128.7, 128.2, 127.5, 83.5, 48.3, 27.4; IR (thin film): 2979, 1731, 1673, 1369, 1229, 1142, 792, 728, 697 cm<sup>-1</sup>; HRMS (ESI) m/z: [M + Na]<sup>+</sup> calcd for C<sub>19</sub>H<sub>20</sub>ClNNaO<sub>3</sub> 368.1024; found 368.1021.

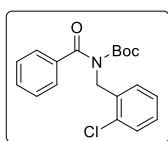

**tert-Butyl benzoyl(2-chlorobenzyl)carbamate (2g).** The reaction was performed following General Procedure A with benzoyl chloride (1.160 mL, 10 mmol), 2-chlorobenzylamine (1.331 mL, 11 mmol) and Boc<sub>2</sub>O (2.70 g, 13 mmol, 1.3 equiv).

The crude material was purified by flash chromatography on silica gel (eluted with hexanes:EtOAc = 20:1) to give the product (2.45 g, 71% yield) as a white solid. <sup>1</sup>H NMR (500 MHz, CDCl<sub>3</sub>): δ 7.57 – 7.67 (m, 2H), 7.52 – 7.47 (m, 1H), 7.44 – 7.40 (m, 2H), 7.39 – 7.35 (m, 1H), 7.35 – 7.32 (m, 1H), 7.27 – 7.23 (m, 1H), 7.22 – 7.19 (m, 1H), 5.12 (s, 2H), 1.14 (s, 9H); <sup>13</sup>C{<sup>1</sup>H} NMR (125 MHz, CDCl<sub>3</sub>): δ 173.2, 153.3, 137.4, 135.3, 133.1, 131.4, 129.6, 128.5, 128.2, 128.2, 127.7, 126.9, 83.5, 46.9, 27.5; IR (thin film): 2979, 2932, 1737, 1679, 1369, 1231, 1148, 750, 696 cm<sup>-1</sup>; HRMS (ESI) m/z: [M + Na]<sup>+</sup> calcd for C<sub>19</sub>H<sub>20</sub>ClNNaO<sub>3</sub> 368.1024; found 368.1009.

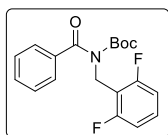

**tert-Butyl benzoyl(2,6-difluorobenzyl)carbamate (2h).** The reaction was performed following General Procedure A with benzoyl chloride (1.160 mL, 10 mmol), 2,6-difluorobenzylamine (1.315 mL, 11 mmol) and Boc<sub>2</sub>O (2.70 g, 13 mmol, 1.3 equiv).

The crude material was purified by flash chromatography on silica gel (eluted with hexanes:EtOAc = 20:1) to give the product (2.26 g, 65% yield) as a white solid. <sup>1</sup>H NMR (500 MHz, CDCl<sub>3</sub>): δ 7.55 – 7.49 (m, 2H), 7.48 – 7.42 (m, 1H), 7.40 – 7.33 (m, 2H), 7.27 – 7.17 (m, 1H), 6.92 – 6.85 (m, 2H), 5.12 (s, 2H), 1.14 (s, 9H); <sup>13</sup>C{<sup>1</sup>H} NMR (125 MHz, CDCl<sub>3</sub>): δ 172.9, 161.7 (dd,  $J_{C(Ar)-F}^1 = 249.6, 8.1$  Hz), 153.2, 137.6, 131.2, 129.2 (t,  $J_{C(Ar)-F}^3 = 10.5$  Hz), 128.1, 127.7, 113.9 (t,  $J_{C(Ar)-F}^2 = 17.8$  Hz), 111.5 (dd,  $J_{C(Ar)-F} = 20.2, 5.7$  Hz), 83.4, 37.8 (dd,  $J_{C-F}^3 = 20.2, 5.7$  Hz), 27.4; IR (thin film): 2980, 1730, 1691, 1626, 1594, 1471, 1333, 783, 697 cm<sup>-1</sup>; HRMS (ESI) m/z: [M + Na]<sup>+</sup> calcd for C<sub>19</sub>H<sub>19</sub>F<sub>2</sub>NaNO<sub>3</sub> 370.1225; found 370.1223.

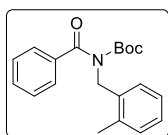

**tert-Butyl benzoyl(2-methylbenzyl)carbamate (2i).** The reaction was performed following General Procedure A with benzoyl chloride (1.160 mL, 10 mmol), 2-methylbenzylamine (1.364 mL, 11 mmol) and Boc<sub>2</sub>O (2.70 g, 13 mmol, 1.3 equiv).

The crude material was purified by flash chromatography on silica gel (eluted with hexanes:EtOAc = 20:1) to give the product (2.18 g, 67% yield) as a white solid. °C; <sup>1</sup>H NMR (500 MHz, CDCl<sub>3</sub>): δ 7.62 – 7.57 (m, 2H), 7.51 – 7.47 (m, 1H), 7.44 – 7.39 (m, 2H), 7.38 – 7.28 (m, 1H), 7.23 – 7.15 (m, 3H), 5.04 (s, 2H), 2.44 (s, 3H), 1.15 (s, 9H); <sup>13</sup>C{<sup>1</sup>H} NMR (125 MHz, CDCl<sub>3</sub>): δ 173.1, 153.6, 137.7, 135.8, 135.6, 131.2, 130.3, 128.1, 127.6, 127.1, 126.7, 126.1, 83.2, 46.4, 27.4, 19.3; IR (thin film): 2978, 1731, 1674, 1339, 1232, 1148, 741, 724, 696 cm<sup>-1</sup>; HRMS (ESI) m/z: [M + Na]<sup>+</sup> calcd for C<sub>20</sub>H<sub>23</sub>NNaO<sub>3</sub> 348.1570; found 348.1572.

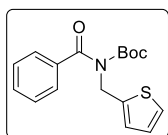

**tert-Butyl benzoyl(thiophen-2-ylmethyl)carbamate (2k).** The reaction was performed following General Procedure A with benzoyl chloride (1.160 mL, 10 mmol), 2-thiophenemethylamine (1.127 mL, 11 mmol) and Boc<sub>2</sub>O (2.70 g, 13 mmol,

1.3 equiv). The crude material was purified by flash chromatography on silica gel (eluted with hexanes:EtOAc = 10:1) to give the product (1.99 g, 63% yield) as a white solid. <sup>1</sup>H NMR (500 MHz, CDCl<sub>3</sub>): δ 7.53 – 7.42 (m, 3H), 7.41 – 7.34 (m, 2H), 7.28 – 7.17 (m, 1H), 7.18 – 7.08 (m, 1H), 7.00 – 6.90 (m, 1H), 5.14 (s, 2H), 1.17 (s, 9H); <sup>13</sup>C{<sup>1</sup>H} NMR (125 MHz, CDCl<sub>3</sub>): δ 172.9, 153.1, 139.8, 137.7, 131.2, 128.2, 127.6, 127.6, 126.6, 125.7, 83.6, 43.6, 27.5; IR (thin film): 2979, 1731, 1673, 1368, 1328, 1248, 1139, 726, 697 cm<sup>-1</sup>; HRMS (ESI) m/z: [M + Na]<sup>+</sup> calcd for C<sub>17</sub>H<sub>19</sub>NNaO<sub>3</sub>S 340.0978; found

340.0973.

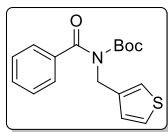

**tert-Butyl benzoyl(thiophen-3-ylmethyl)carbamate (2l).** The reaction was performed following General Procedure A with benzoyl chloride (1.160 mL, 10 mmol), 3-thiophenemethylamine (1.24 g, 11 mmol) and Boc<sub>2</sub>O (2.70 g, 13 mmol, 1.3 equiv). The crude material was purified by flash chromatography on silica gel (eluted with hexanes:EtOAc = 10:1) to give the product (1.90 g, 60% yield) as a white solid. <sup>1</sup>H NMR (500 MHz, CDCl<sub>3</sub>): δ 7.49 – 7.43 (m, 3H), 7.39 – 7.34 (m, 2H), 7.33 – 7.29 (m, 1H), 7.29 – 7.23 (m, 1H), 7.22 – 7.18 (m, 1H), 4.97 (s, 2H), 1.13 (s, 9H); <sup>13</sup>C{<sup>1</sup>H} NMR (125 MHz, CDCl<sub>3</sub>): δ 173.0, 153.4, 138.4, 137.9, 131.1, 128.2, 128.1, 127.5, 125.7, 123.7, 83.3, 44.0, 27.5; IR (thin film): 2978, 1731, 1673, 1368, 1335, 1240, 1137, 728, 696 cm<sup>-1</sup>; HRMS (ESI) m/z: [M + Na]<sup>+</sup> calcd for C<sub>17</sub>H<sub>19</sub>NNaO<sub>3</sub>S 340.0978; found 340.0959.

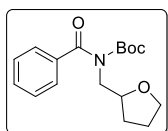

**tert-Butyl benzoyl((tetrahydrofuran-2-yl)methyl)carbamate (2m).** The reaction was performed following General Procedure A with benzoyl chloride (1.160 mL, 10 mmol), 2-tetrahydrofurfurylamine (1.147 mL, 11 mmol) and Boc<sub>2</sub>O (2.70 g, 13 mmol, 1.3 equiv). The crude material was purified by flash chromatography on silica gel (eluted with hexanes:EtOAc = 15:1) to give the product (1.56 g, 51% yield) as a colorless liquid; <sup>1</sup>H NMR (500 MHz, CDCl<sub>3</sub>): δ 7.59 – 7.52 (m, 2H), 7.46 – 7.44 (m, 1H), 7.40 – 7.29 (m, 2H), 4.31 (m, 1H), 4.05 – 3.95 (m, 1H), 3.76 – 3.66 (m, 3H), 2.10 – 1.75 (m, 3H), 1.70 – 1.60 (m, 1H), 1.08 (s, 9H); <sup>13</sup>C{<sup>1</sup>H} NMR (125 MHz, CDCl<sub>3</sub>): δ 173.5, 153.9, 138.1, 131.0, 128.1, 127.7, 82.9, 77.1, 67.7, 49.1, 29.1, 27.4, 25.6; IR (thin film): 2977, 2936, 1731, 1679, 1368, 1233, 1144, 726, 698 cm<sup>-1</sup>; HRMS (ESI) m/z: [M + Na]<sup>+</sup> calcd for C<sub>17</sub>H<sub>23</sub>NNaO<sub>4</sub> 328.1519; found 328.1504.

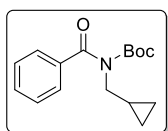

**tert-Butyl benzoyl(cyclopropylmethyl)carbamate (2p).** The reaction was performed following General Procedure A with benzoyl chloride (1.160 mL, 10 mmol), cyclopropanemethylamine (0.943 mL, 11 mmol) and Boc<sub>2</sub>O (2.70 g, 13 mmol, 1.3 equiv). The crude material was purified by flash chromatography on silica gel (eluted with hexanes:EtOAc = 30:1) to give the product (1.38 g, 50% yield) as a colorless liquid; <sup>1</sup>H NMR (500 MHz, CDCl<sub>3</sub>): δ 7.55 – 7.49 (m, 2H), 7.48 – 7.42 (m, 1H), 7.41 – 7.33 (m, 2H), 3.68 (d, *J* = 7.2 Hz, 2H), 1.32 – 1.23 (m, 1H), 1.13 (s, 9H), 0.51 – 0.46 (m, 2H), 0.38 – 0.33 (m, 2H); <sup>13</sup>C{<sup>1</sup>H} NMR (125 MHz, CDCl<sub>3</sub>): δ 173.6, 153.9, 138.3, 130.9, 128.1, 127.4, 82.8, 50.2, 27.4, 10.7, 3.6; IR (thin film): 2979, 2935, 1729, 1678, 1358, 1241, 1140, 725, 697 cm<sup>-1</sup>; HRMS (ESI) m/z: [M + Na]<sup>+</sup> calcd for C<sub>16</sub>H<sub>21</sub>NO<sub>3</sub> 298.1414;

found 298.1418.

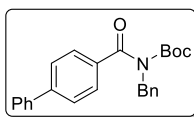

**tert-Butyl ([1,1'-biphenyl]-4-carbonyl)(benzyl)carbamate (2b')**. The reaction was performed following General Procedure A with 4-biphenylcarbonyl chloride (2.17 g, 10 mmol), benzylamine (1.202 mL, 11 mmol) and Boc<sub>2</sub>O (2.70 g, 13 mmol, 1.3 equiv). The crude material was purified by flash chromatography on silica gel (eluted with hexanes:EtOAc = 20:1) to give the product (2.90 g, 75% yield) as a white solid. <sup>1</sup>H NMR (500 MHz, CDCl<sub>3</sub>): δ 7.64 – 7.58 (m, 6H), 7.48 – 7.41 (m, 4H), 7.41 – 7.36 (m, 1H), 7.36 – 7.32 (m, 2H), 7.30 – 7.32 (m, 1H), 5.01 (s, 2H), 1.16 (s, 9H). The NMR spectral data match the previously published data.<sup>3</sup>

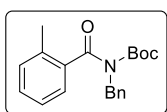

**tert-Butyl benzyl(2-methylbenzoyl)carbamate (2d')**. The reaction was performed following General Procedure A with 2-toluoyl chloride (1.305 mL, 10 mmol), benzylamine (1.202 mL, 11 mmol) and Boc<sub>2</sub>O (2.70 g, 13 mmol, 1.3 equiv). The crude material was purified by flash chromatography on silica gel (eluted with hexanes:EtOAc = 20:1) to give the product (2.05 g, 63% yield) as a white solid. <sup>1</sup>H NMR (500 MHz, CDCl<sub>3</sub>): δ 7.52 – 7.43 (m, 2H), 7.41 – 7.33 (m, 2H), 7.32 – 7.26 (m, 2H), 7.21 – 7.11 (m, 3H), 5.05 (s, 2H), 2.34 (s, 3H), 1.10 (s, 9H). The NMR spectral data match the previously published data.<sup>1</sup>

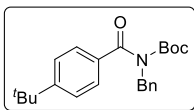

**tert-Butyl benzyl(4-(tert-butyl)benzoyl)carbamate (2e')**. The reaction was performed following General Procedure A with 4-*tert*-butylbenzoyl chloride (1.989 mL, 10 mmol), benzylamine (1.202 mL, 11 mmol) and Boc<sub>2</sub>O (2.70 g, 13 mmol, 1.3 equiv). The crude material was purified by flash chromatography on silica gel (eluted with hexanes:EtOAc = 20:1) to give the product (2.61 g, 71% yield) as a white solid. <sup>1</sup>H NMR (500 MHz, CDCl<sub>3</sub>): δ 7.49 – 7.44 (m, 2H), 7.44 – 7.42 (m, 2H), 7.41 – 7.37 (m, 2H), 7.36 – 7.28 (m, 2H), 7.28 – 7.22 (m, 1H), 4.98 (s, 2H), 1.32 (s, 9H), 1.11 (s, 9H). The NMR spectral data match the previously published data.<sup>3</sup>

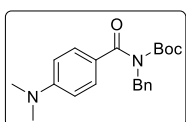

**tert-Butyl benzyl(4-(dimethylamino)benzoyl)carbamate (2f')**. The reaction was performed following General Procedure A with 4-dimethylaminobenzoylchloride (1.539 mL, 10 mmol), benzylamine (1.202 mL, 11 mmol) and Boc<sub>2</sub>O (2.70 g, 13 mmol, 1.3 equiv). The crude material was purified by flash chromatography on silica gel (eluted with hexanes:EtOAc = 8:1) to give the product (2.30 g, 65% yield) as a white solid. <sup>1</sup>H NMR (500 MHz, CDCl<sub>3</sub>): δ 7.56 – 7.49 (m, 2H), 7.44 – 7.39 (m, 2H), 7.35 – 7.27 (m, 2H), 7.26 – 7.21 (m, 1H), 6.65 – 6.58 (m, 2H), 4.94 (s, 2H), 3.01 (s, 6H), 1.22 (s, 9H). The NMR spectral data match the previously



published data.<sup>1</sup>

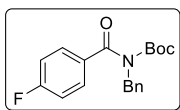

**tert-Butyl benzyl(4-fluorobenzoyl)carbamate (2g')**. The reaction was performed following General Procedure A with 4-fluorobenzoyl chloride (1.117 mL, 10 mmol), benzylamine (1.202 mL, 11 mmol) and Boc<sub>2</sub>O (2.70 g, 13 mmol, 1.3 equiv). The crude material was purified by flash chromatography on silica gel (eluted with hexanes:EtOAc = 20:1) to give the product (2.47 g, 75% yield) as a white solid. <sup>1</sup>H NMR (500 MHz, CDCl<sub>3</sub>): δ 7.58 – 7.52 (m, 2H), 7.46 – 7.39 (m, 2H), 7.37 – 7.31 (m, 2H), 7.30 – 7.26 (m, 1H), 7.11 – 7.05 (m, 2H), 4.98 (s, 2H), 1.18 (s, 9H). The NMR spectral data match the previously published data.<sup>3</sup>

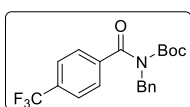

**tert-Butyl benzyl(4-(trifluoromethyl)benzoyl)carbamate (2h')**. The reaction was performed following General Procedure A with 4-(trifluoromethyl)benzoyl chloride (1.105 mL, 10 mmol), benzylamine (1.202 mL, 11 mmol) and Boc<sub>2</sub>O (2.70 g, 13 mmol, 1.3 equiv). The crude material was purified by flash chromatography on silica gel (eluted with hexanes:EtOAc = 24:1) to give the product (2.65 g, 70% yield) as a white solid. <sup>1</sup>H NMR (500 MHz, CDCl<sub>3</sub>): δ 7.54 – 7.49 (m, 2H), 7.49 – 7.43 (m, 1H), 7.41 – 7.37 (m, 2H), 7.37 – 7.33 (m, 4H), 4.96 (s, 2H), 1.31 (s, 9H), 1.13 (s, 9H). The NMR spectral data match the previously published data.<sup>1</sup>

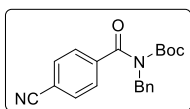

**tert-Butyl benzyl(4-cyanobenzoyl)carbamate (2i')**. The reaction was performed following General Procedure A with 4-cyanobenzoyl chloride (1.66 g, 10 mmol), benzylamine (1.202 mL, 11 mmol) and Boc<sub>2</sub>O (2.70 g, 13 mmol, 1.3 equiv). The crude material was purified by flash chromatography on silica gel (eluted with hexanes:EtOAc = 10:1) to give the product (2.18 g, 65% yield) as a white solid. <sup>1</sup>H NMR (500 MHz, CDCl<sub>3</sub>): δ 7.72 – 7.65 (m, 2H), 7.61 – 7.54 (m, 2H), 7.43 – 7.37 (m, 2H), 7.37 – 7.31 (m, 2H), 7.31 – 7.25 (m, 1H), 4.99 (s, 2H), 1.17 (s, 9H). The NMR spectral data match the previously published data.<sup>4</sup>

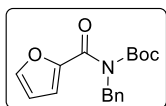

**tert-Butyl benzyl(furan-2-carbonyl)carbamate (2j')**. The reaction was performed following General Procedure A with 2-furoyl chloride (0.986 mL, 10 mmol), benzylamine (1.202 mL, 11 mmol) and Boc<sub>2</sub>O (2.70 g, 13 mmol, 1.3 equiv). The crude material was purified by flash chromatography on silica gel (eluted with hexanes:EtOAc = 24:1) to give the product (1.67 g, 56% yield) as a white solid. <sup>1</sup>H NMR (500 MHz, CDCl<sub>3</sub>): δ 7.49 (m, 1H), 7.43 – 7.36 (m, 2H), 7.34 – 7.29 (m, 2H), 7.28 – 7.20 (m, 1H), 7.14 – 7.04 (m, 1H), 6.51 (m, 1H), 4.92 (s, 2H), 1.29 (s, 9H). The NMR spectral data match the previously published data.<sup>3</sup>

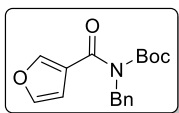

**tert-Butyl benzyl(furan-3-carbonyl)carbamate (2k')**. The reaction was performed following General Procedure A with 3-furoyl chloride (1.31 g, 10 mmol), benzylamine (1.202 mL, 11 mmol) and Boc<sub>2</sub>O (2.70 g, 13 mmol, 1.3 equiv). The crude material was purified by flash chromatography on silica gel (eluted with hexanes:EtOAc = 24:1) to give the product (1.66 g, 55% yield) as a white solid. <sup>1</sup>H NMR (500 MHz, CDCl<sub>3</sub>): δ 7.93 – 7.85 (m, 1H), 7.41 – 7.37 (m, 1H), 7.37 – 7.29 (m, 4H), 7.25 (s, 1H), 6.60 – 6.52 (m, 1H), 4.92 (s, 2H), 1.31 (s, 9H). The NMR spectral data match the previously published data.<sup>1</sup>

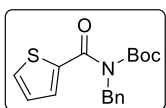

**tert-Butyl benzyl(thiophene-2-carbonyl)carbamate (2l')**. The reaction was performed following General Procedure A with 2-thiophenecarbonyl chloride (1.47 g, 10 mmol), benzylamine (1.202 mL, 11 mmol) and Boc<sub>2</sub>O (2.70 g, 13 mmol, 1.3 equiv). The crude material was purified by flash chromatography on silica gel (eluted with hexanes:EtOAc = 10:1) to give the product (1.62 g, 51% yield) as a white solid. <sup>1</sup>H NMR (500 MHz, CDCl<sub>3</sub>): δ 7.60 – 7.54 (m, 2H), 7.54 – 7.50 (m, 2H), 7.36 – 7.31 (m, 2H), 7.27 – 7.24 (m, 1H), 7.22 – 7.16 (m, 1H), 4.92 (s, 2H), 1.06 (s, 9H). The NMR spectral data match the previously published data.<sup>3</sup>

### Characterization Data for *N*-aroylureas

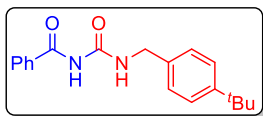

*N*-((4-(*tert*-butyl)benzyl)carbamoyl)benzamide (**3aa**). The reaction was performed following General Procedure B with benzamide **1a** (12.1 mg, 0.1 mmol), KO<sup>t</sup>Bu (33.7 mg, 0.3 mmol) and *tert*-butyl benzoyl(4-(*tert*-butyl)benzyl)carbamate **2a** (36.7 mg, 0.1 mmol) dissolved in DME (1 mL) at 100 °C for 12 h. The crude material was purified by flash chromatography on silica gel (eluted with hexanes:EtOAc = 10:1) to give the product (22.3 mg, 72% yield) as a white solid. mp: 128–130 °C; <sup>1</sup>H NMR (500 MHz, DMSO-*d*<sub>6</sub>) δ 10.77 (s, 1H), 9.04 (t, *J* = 5.9 Hz, 1H), 8.00 – 7.93 (m, 2H), 7.61 (t, *J* = 7.0 Hz, 1H), 7.54 – 7.46 (m, 2H), 7.40 – 7.32 (m, 2H), 7.26 (d, *J* = 8.4 Hz, 2H), 4.41 (d, *J* = 5.9 Hz, 2H), 1.27 (s, 9H); <sup>13</sup>C NMR (126 MHz, DMSO-*d*<sub>6</sub>) δ 168.3, 153.6, 149.4, 136.2, 132.8, 132.6, 128.5, 128.1, 127.1, 125.2, 42.4, 34.2, 31.2; IR (thin film): 3276, 2961, 1694, 1660, 1600, 1508, 1331, 1270, 850, 702 cm<sup>-1</sup>; HRMS (ESI) *m/z*: [M + Na]<sup>+</sup> calcd for C<sub>19</sub>H<sub>22</sub>N<sub>2</sub>NaO<sub>2</sub> 333.1573; found 333.1570.

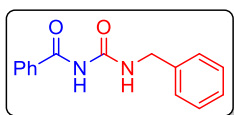

*N*-(benzylcarbamoyl)benzamide (**3ab**). The reaction was performed following General Procedure B with benzamide **1a** (12.1 mg, 0.1 mmol), KO<sup>t</sup>Bu (33.7 mg, 0.3 mmol), and *tert*-butyl benzoyl(benzyl)carbamate **2b** (31.1 mg, 0.1 mmol) dissolved in DME (1 mL) at 100 °C for 12 h. The crude material was purified by flash chromatography on silica gel (eluted with hexanes:EtOAc = 10:1) to give the product (13.2 mg, 52% yield) as a white solid. <sup>1</sup>H NMR (500 MHz, DMSO-*d*<sub>6</sub>): δ 10.75 (s, 1H), 9.05 (t, *J* = 6.0 Hz, 1H), 7.93 (dd, *J* = 8.0, 1.0 Hz, 2H), 7.60 – 7.57 (m, 1H), 7.49 – 7.45 (m, 2H), 7.32 – 7.30 (m, 4H), 7.24 – 7.21 (m, 1H), 4.42 (d, *J* = 6.0 Hz, 2H). The NMR spectral data match the previously published data.<sup>5</sup>

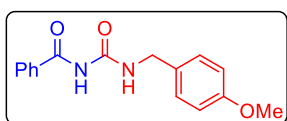

*N*-((4-methoxybenzyl)carbamoyl)benzamide (**3ac**). The reaction was performed following General Procedure B with benzamide **1a** (12.1 mg, 0.1 mmol), KO<sup>t</sup>Bu (33.7 mg, 0.3 mmol), and *tert*-butyl benzoyl(4-methoxybenzyl)carbamate **2c** (34.1 mg, 0.1 mmol) dissolved in DME (1 mL) at 100 °C for 12 h. The crude material was purified by flash chromatography on silica gel (eluted with hexanes:EtOAc = 10:1) to give the product (17.3 mg, 61% yield) as a white solid. <sup>1</sup>H NMR (500 MHz, CDCl<sub>3</sub>): δ 9.38 (s, 1H), 9.00 (t, *J* = 6.0 Hz, 1H), 7.88 – 7.87 (m, 2H), 7.52 – 7.49 (m, 1H), 7.40 – 7.38 (m, 2H), 7.21 – 7.20 (m, 2H), 6.81 – 6.79 (m, 2H), 4.43 (d, *J* = 6.0 Hz, 2H), 3.73 (s, 3H). The NMR spectral data match the previously published data.<sup>6</sup>

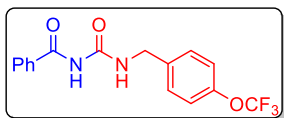

**N-((4-(trifluoromethoxy)benzyl)carbamoyl)benzamide (3ad).** The reaction was performed following General Procedure B with benzamide **1a** (12.1 mg, 0.1 mmol), KO<sup>t</sup>Bu (33.7 mg, 0.3 mmol), and *tert*-butyl benzoyl(4-(trifluoromethoxy)benzyl)carbamate **2d** (39.5 mg, 0.1 mmol) dissolved in DME (1 mL) at 100 °C for 12 h. The crude material was purified by flash chromatography on silica gel (eluted with hexanes:EtOAc = 10:1) to give the product (18.6 mg, 55% yield) as a white solid. mp: 174–176 °C; <sup>1</sup>H NMR (500 MHz, DMSO-*d*<sub>6</sub>): δ 10.77 (s, 1H), 9.12 (t, *J* = 6.0 Hz, 1H), 7.95 – 7.93 (m, 2H), 7.61 – 7.58 (m, 1H), 7.49 – 7.42 (m, 4H), 7.31 (d, *J* = 8.0 Hz, 2H), 4.44 (d, *J* = 6.0 Hz, 2H); <sup>13</sup>C{<sup>1</sup>H} NMR (125 MHz, DMSO-*d*<sub>6</sub>): δ 168.3, 153.8, 147.3, 139.0, 132.8, 132.6, 129.1, 128.5, 128.2, 121.1, 42.1, one resonance was not observed due to coincidental overlap; IR (thin film): 3296, 2944, 1697, 1666, 1508, 1307, 1274, 850, 699 cm<sup>-1</sup>; HRMS (ESI) *m/z*: [M + Na]<sup>+</sup> calcd for C<sub>16</sub>H<sub>13</sub>F<sub>3</sub>N<sub>2</sub>NaO<sub>3</sub> 361.0770; found 361.0774.

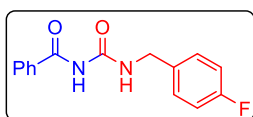

**N-((4-fluorobenzyl)carbamoyl)benzamide (3ae).** The reaction was performed following General Procedure B with benzamide **1a** (12.1 mg, 0.1 mmol), KO<sup>t</sup>Bu (33.7 mg, 0.3 mmol), and *tert*-butyl benzoyl(4-fluorobenzyl)carbamate **2e** (32.9 mg, 0.1 mmol) dissolved in DME (1 mL) at 100 °C for 12 h. The crude material was purified by flash chromatography on silica gel (eluted with hexanes:EtOAc = 10:1) to give the product (14.1 mg, 52% yield) as a white solid. mp: 115–117 °C; <sup>1</sup>H NMR (500 MHz, DMSO-*d*<sub>6</sub>): δ 10.75 (s, 1H), 9.05 (t, *J* = 6.0 Hz, 1H), 7.94 – 7.92 (m, 2H), 7.59 – 7.56 (m, 1H), 7.48 – 7.45 (m, 2H), 7.36 – 7.33 (m, 2H), 7.15 – 7.11 (m, 2H), 4.41 (d, *J* = 6.0 Hz, 2H); <sup>13</sup>C{<sup>1</sup>H} NMR (125 MHz, DMSO-*d*<sub>6</sub>): δ 168.3, 161.3 (d, *J*<sub>C(Ar)-F</sub> = 242.3 Hz), 153.7, 135.6 (d, *J*<sub>C(Ar)-F</sub> = 3.0 Hz), 132.8, 132.6, 129.4 (d, *J*<sub>C(Ar)-F</sub> = 8.1 Hz), 128.5, 128.2, 115.1 (d, *J*<sub>C(Ar)-F</sub> = 21.3 Hz), 42.1; IR (thin film): 3297, 2943, 1691, 1666, 1542, 1274, 836, 703 cm<sup>-1</sup>; HRMS (ESI) *m/z*: [M + Na]<sup>+</sup> calcd for C<sub>15</sub>H<sub>13</sub>FN<sub>2</sub>NaO<sub>2</sub> 295.0853; found 295.0846.

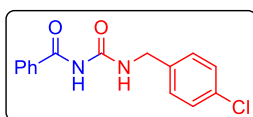

**N-((4-chlorobenzyl)carbamoyl)benzamide (3af).** The reaction was performed following General Procedure B with benzamide **1a** (12.1 mg, 0.1 mmol), KO<sup>t</sup>Bu (33.7 mg, 0.3 mmol), and *tert*-butyl benzoyl(4-chlorobenzyl)carbamate **2f** (34.5 mg, 0.1 mmol) dissolved in DME (1 mL) at 100 °C for 12 h. The crude material was purified by flash chromatography on silica gel (eluted with hexanes:EtOAc = 10:1) to give the product (15.8 mg, 55% yield) as a white solid. mp: 169–172 °C; <sup>1</sup>H NMR (500 MHz, DMSO-*d*<sub>6</sub>): δ

10.75 (s, 1H), 9.07 (t,  $J = 6.0$  Hz, 1H), 7.92 (d,  $J = 8.0$  Hz, 2H), 7.58 (t,  $J = 7.5$  Hz, 1H), 7.46 (t,  $J = 7.5$  Hz, 2H), 7.37 – 7.31 (m, 4H), 4.40 (d,  $J = 6.0$  Hz, 2H);  $^{13}\text{C}\{^1\text{H}\}$  NMR (125 MHz, DMSO- $d_6$ ):  $\delta$  168.3, 153.7, 138.5, 132.8, 132.6, 131.5, 129.2, 128.5, 128.4, 128.2, 42.1; IR (thin film): 3298, 2924, 1694, 1665, 1538, 1272, 797, 694  $\text{cm}^{-1}$ ; HRMS (ESI)  $m/z$ :  $[\text{M} + \text{Na}]^+$  calcd for  $\text{C}_{15}\text{H}_{13}\text{ClN}_2\text{NaO}_2$  311.0558; found 311.0565.

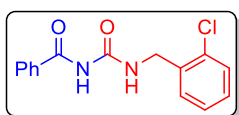

***N*-((2-chlorobenzyl)carbamoyl)benzamide (3ag).** The reaction was performed following General Procedure B with benzamide **1a** (12.1 mg, 0.1 mmol), KO<sup>t</sup>Bu (33.7 mg, 0.3 mmol), and *tert*-butyl benzoyl(2-chlorobenzyl)carbamate **2g** (34.5 mg, 0.1 mmol) dissolved in DME (1 mL) at 100 °C for 12 h. The crude material was purified by flash chromatography on silica gel (eluted with hexanes:EtOAc = 10:1) to give the product (17.6 mg, 61% yield) as a white solid. mp: 163–165 °C;  $^1\text{H}$  NMR (500 MHz, DMSO- $d_6$ ):  $\delta$  10.81 (s, 1H), 9.12 (t,  $J = 6.0$  Hz, 1H), 7.95 – 7.94 (m, 2H), 7.60 – 7.57 (m, 1H), 7.48 – 7.43 (m, 3H), 7.38 – 7.37 (m, 1H), 7.33 – 7.27 (m, 2H), 4.49 (d,  $J = 6.0$  Hz, 2H);  $^{13}\text{C}\{^1\text{H}\}$  NMR (125 MHz, DMSO- $d_6$ ):  $\delta$  168.5, 153.8, 136.2, 132.9, 132.6, 132.2, 129.3, 129.0, 128.96, 128.6, 128.3, 127.4, 40.9; IR (thin film): 3289, 2924, 1686, 1665, 1561, 1471, 1275, 756, 705  $\text{cm}^{-1}$ ; HRMS (ESI)  $m/z$ :  $[\text{M} + \text{Na}]^+$  calcd for  $\text{C}_{15}\text{H}_{13}\text{ClN}_2\text{NaO}_2$  311.0558; found 311.0560.

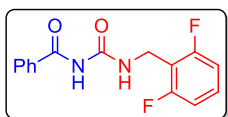

***N*-((2,6-difluorobenzyl)carbamoyl)benzamide (3ah).** The reaction was performed following General Procedure B with benzamide **1a** (12.1 mg, 0.1 mmol), KO<sup>t</sup>Bu (33.7 mg, 0.3 mmol), and *tert*-butyl benzoyl(2,6-difluorobenzyl)carbamate **2h** (34.7 mg, 0.1 mmol) dissolved in DME (1 mL) at 100 °C for 12 h. The crude material was purified by flash chromatography on silica gel (eluted with hexanes:EtOAc = 10:1) to give the product (20.0 mg, 69% yield) as a white solid. mp: 183–185 °C;  $^1\text{H}$  NMR (500 MHz, DMSO- $d_6$ ):  $\delta$  10.78 (s, 1H), 9.04 (t,  $J = 6.0$  Hz, 1H), 7.91 – 9.89 (m, 2H), 7.59 – 7.56 (m, 1H), 7.47 – 7.44 (m, 2H), 7.41 – 7.36 (m, 1H), 7.11 – 7.08 (m, 2H), 4.51 (d,  $J = 6.0$  Hz, 2H);  $^{13}\text{C}\{^1\text{H}\}$  NMR (125 MHz, DMSO- $d_6$ ):  $\delta$  168.5, 161.3 (dd,  $J^1 = 247.4$ , 8.3 Hz), 153.3, 132.9, 132.4, 130.6 (t,  $J^4 = 10.5$  Hz), 129.0, 128.6, 114.6 (t,  $J^3 = 19.3$  Hz), 112.2 (dd,  $J^2 = 19.9$ , 5.6 Hz), 31.1; IR (thin film): 3315, 2969, 1698, 1668, 1537, 1471, 1267, 781, 708  $\text{cm}^{-1}$ ; HRMS (ESI)  $m/z$ :  $[\text{M} + \text{Na}]^+$  calcd for  $\text{C}_{15}\text{H}_{12}\text{F}_2\text{N}_2\text{NaO}_2$  313.0759; found 313.0760.

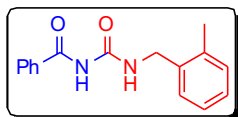

***N*-((2-methylbenzyl)carbamoyl)benzamide (3ai).** The reaction was performed following General Procedure B with benzamide **1a** (12.1 mg, 0.1 mmol), KO<sup>t</sup>Bu (33.7 mg, 0.3 mmol), and *tert*-butyl benzoyl(2-methylbenzyl)carbamate **2i** (32.5 mg, 0.1 mmol) dissolved in DME (1 mL) at 100 °C for 12 h. The crude material was purified by flash chromatography on silica gel (eluted with hexanes:EtOAc = 10:1) to give the product (20.9 mg, 78% yield) as a white solid. mp: 128–130 °C; <sup>1</sup>H NMR (500 MHz, DMSO-*d*<sub>6</sub>): δ 10.78 (s, 1H), 8.94 (t, *J* = 6.0 Hz, 1H), 7.94 – 7.93 (m, 2H), 7.60 – 7.57 (m, 1H), 7.48 – 7.45 (m, 2H), 7.24 – 7.22 (m, 1H), 7.15 – 7.14 (m, 3H), 4.40 (d, *J* = 6.0 Hz, 2H), 2.28 (s, 3H); <sup>13</sup>C{<sup>1</sup>H} NMR (125 MHz, DMSO-*d*<sub>6</sub>): δ 168.4, 153.6, 136.8, 135.5, 132.8, 132.5, 130.1, 128.5, 128.2, 127.3, 127.1, 126.0, 40.9, 18.6; IR (thin film): 3311, 2922, 1683, 1554, 1269, 743, 709 cm<sup>-1</sup>; HRMS (ESI) *m/z*: [M + Na]<sup>+</sup> calcd for C<sub>16</sub>H<sub>16</sub>N<sub>2</sub>NaO<sub>2</sub> 291.1104; found 291.1109.

***N*-((furan-2-ylmethyl)carbamoyl)benzamide (3aj).** The reaction was performed following General

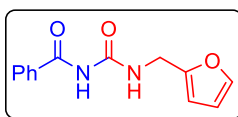

Procedure B with benzamide **1a** (12.1 mg, 0.1 mmol), KO<sup>t</sup>Bu (33.7 mg, 0.3 mmol), and *tert*-butyl benzoyl(furan-2-ylmethyl)carbamate **2i** (30.1 mg, 0.1 mmol) dissolved in DME (1 mL) at 100 °C for 12 h. The crude material was purified by flash chromatography on silica gel (eluted with hexanes:EtOAc = 10:1) to give the product (11.2 mg, 46% yield) as a white solid. mp: 133–135 °C; <sup>1</sup>H NMR (500 MHz, CDCl<sub>3</sub>): δ 9.99 (s, 1H), 9.16 (t, *J* = 5.7 Hz, 1H), 8.08 – 7.95 (m, 2H), 7.63 – 7.55 (m, 1H), 7.50 – 7.45 (m, 2H), 7.38 – 7.36 (m, 1H), 6.34 – 6.30 (m, 1H), 6.27 – 6.23 (m, 1H), 4.56 (d, *J* = 6.0 Hz, 2H); <sup>13</sup>C{<sup>1</sup>H} NMR (125 MHz, CDCl<sub>3</sub>): δ 168.3, 154.4, 151.2, 142.5, 133.3, 132.4, 129.0, 127.9, 110.5, 107.6, 37.0; IR (thin film): 3308, 2925, 1689, 1666, 1600, 1504, 1270, 700 cm<sup>-1</sup>; HRMS (ESI) *m/z*: [M + Na]<sup>+</sup> calcd for C<sub>13</sub>H<sub>12</sub>N<sub>2</sub>NaO<sub>3</sub> 267.0740; found 267.0747.

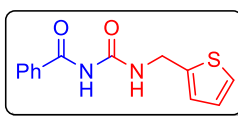

***N*-((thiophen-2-ylmethyl)carbamoyl)benzamide (3ak).** The reaction was performed following General Procedure B with benzamide **1a** (12.1 mg, 0.1 mmol), KO<sup>t</sup>Bu (33.7 mg, 0.3 mmol), and *tert*-butyl benzoyl(thiophen-2-ylmethyl)carbamate **2k** (31.7 mg, 0.1 mmol) dissolved in DME (1 mL) at 100 °C for 12 h. The crude material was purified by flash chromatography on silica gel (eluted with hexanes:EtOAc = 10:1) to give the product (13.8 mg, 53% yield) as a white solid. mp: 153–155 °C; <sup>1</sup>H NMR (500 MHz, DMSO-*d*<sub>6</sub>): δ 10.77 (s, 1H), 9.06 (t, *J* = 6.0 Hz, 1H), 7.91 (dd, *J* = 8.5, 1.0 Hz, 2H), 7.59 – 7.56 (m, 1H), 7.47 – 7.44 (m, 2H), 7.37 – 7.36 (m, 1H), 7.00 – 6.99 (m, 1H), 6.94 – 6.92 (m, 1H), 4.58 (d, *J* = 6.0 Hz, 2H); <sup>13</sup>C{<sup>1</sup>H} NMR (125 MHz, DMSO-*d*<sub>6</sub>): δ 168.3, 154.4, 151.2, 142.5, 133.3, 132.4, 129.0, 127.9, 110.5, 107.6, 37.0; IR (thin film): 3308, 2925, 1689, 1666, 1600, 1504, 1270, 700 cm<sup>-1</sup>; HRMS (ESI) *m/z*: [M + Na]<sup>+</sup> calcd for C<sub>13</sub>H<sub>12</sub>N<sub>2</sub>NaO<sub>3</sub> 267.0740; found 267.0747.

NMR (125 MHz, DMSO-*d*<sub>6</sub>):  $\delta$  168.3, 153.5, 142.1, 132.8, 132.5, 128.5, 128.2, 126.8, 125.8, 125.3, 37.8; IR (thin film): 3226, 2920, 1702, 1690, 1541, 1268, 698 cm<sup>-1</sup>; HRMS (ESI) *m/z*: [M + Na]<sup>+</sup> calcd for C<sub>13</sub>H<sub>12</sub>N<sub>2</sub>NaO<sub>2</sub>S 283.0512; found 283.0520.

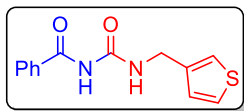

***N*-((thiophen-3-ylmethyl)carbamoyl)benzamide (3al).** The reaction was performed following General Procedure B with benzamide **1a** (12.1 mg, 0.1 mmol), KO<sup>t</sup>Bu (33.7 mg, 0.3 mmol), and *tert*-butyl benzoyl(thiophen-3-ylmethyl)carbamate **2l** (31.7 mg, 0.1 mmol) dissolved in DME (1 mL) at 100 °C for 12 h. The crude material was purified by flash chromatography on silica gel (eluted with hexanes:EtOAc = 10:1) to give the product (11.4 mg, 44% yield) as a white solid. mp: 159–162 °C; <sup>1</sup>H NMR (500 MHz, DMSO-*d*<sub>6</sub>):  $\delta$  10.75 (s, 1H), 8.99 (t, *J* = 6.0 Hz, 1H), 7.94 – 7.92 (m, 2H), 7.60 – 7.57 (m, 1H), 7.49 – 7.45 (m, 3H), 7.36 (s, 1H), 7.09 – 7.07 (m, 1H), 4.42 (d, *J* = 6.0 Hz, 2H); <sup>13</sup>C {<sup>1</sup>H} NMR (125 MHz, DMSO-*d*<sub>6</sub>):  $\delta$  168.3, 153.6, 140.0, 132.8, 132.6, 128.5, 128.2, 127.5, 126.6, 122.1, 38.3; IR (thin film): 3290, 2938, 1702, 1689, 1544, 1271, 702 cm<sup>-1</sup>; HRMS (ESI) *m/z*: [M + Na]<sup>+</sup> calcd for C<sub>13</sub>H<sub>12</sub>N<sub>2</sub>NaO<sub>2</sub>S 283.0512; found 283.0515.

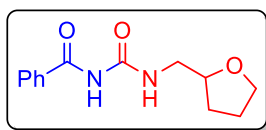

***N*-(((tetrahydrofuran-2-yl)methyl)carbamoyl)benzamide (3am).** The reaction was performed following General Procedure B with benzamide **1a** (12.1 mg, 0.1 mmol), KO<sup>t</sup>Bu (33.7 mg, 0.3 mmol), and *tert*-butyl benzoyl((tetrahydrofuran-2-yl)methyl)carbamate **2m** (30.5 mg, 0.1 mmol) dissolved in DME (1 mL) at 100 °C for 12 h. The crude material was purified by flash chromatography on silica gel (eluted with hexanes:EtOAc = 10:1) to give the product (20.6 mg, 83% yield) as a white solid. mp: 115–117 °C; <sup>1</sup>H NMR (500 MHz, DMSO-*d*<sub>6</sub>):  $\delta$  10.75 (s, 1H), 8.81 (t, *J* = 6.0 Hz, 1H), 7.97 – 7.96 (m, 2H), 7.64 – 7.61 (m, 1H), 7.53 – 7.50 (m, 2H), 3.97 – 3.93 (m, 1H), 3.82 – 3.77 (m, 1H), 3.68 – 3.63 (m, 1H), 3.43 – 3.39 (m, 1H), 3.26 – 3.24 (m, 1H), 1.97 – 1.90 (m, 1H), 1.87 – 1.79 (m, 2H), 1.58 – 1.51 (m, 1H); <sup>13</sup>C {<sup>1</sup>H} NMR (125 MHz, DMSO-*d*<sub>6</sub>):  $\delta$  168.4, 153.7, 132.8, 132.6, 128.5, 128.2, 77.0, 67.4, 43.1, 28.3, 25.4; IR (thin film): 3307, 2938, 1686, 1671, 1549, 1477, 1268, 719 cm<sup>-1</sup>; HRMS (ESI) *m/z*: [M + Na]<sup>+</sup> calcd for C<sub>13</sub>H<sub>17</sub>N<sub>2</sub>O<sub>3</sub> 271.1059; found 271.1028.

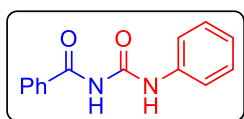

***N*-(phenylcarbamoyl)benzamide (3an).** The reaction was performed following General Procedure B with benzamide **1a** (12.1 mg, 0.1 mmol), KO<sup>t</sup>Bu (33.7 mg, 0.3 mmol), and *tert*-butyl benzoyl(phenyl)carbamate **2n** (29.7 mg, 0.1 mmol) dissolved in DME (1 mL) at 100 °C for 12 h. The crude material was purified by flash chromatography on silica gel (eluted with hexanes:EtOAc = 10:1) to give the product (13.0 mg, 54%

yield) as a white solid.  $^1\text{H}$  NMR (500 MHz,  $\text{DMSO-}d_6$ ):  $\delta$  11.02 (s, 1H), 10.82 (s, 1H), 8.01 – 7.99 (m, 2H), 7.65 – 7.62 (m, 1H), 7.58 – 7.49 (m, 4H), 7.36 – 7.32 (m, 2H), 7.11 – 7.07 (m, 1H). The NMR spectral data match the previously published data.<sup>5</sup>

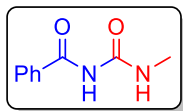

***N*-(methylcarbamoyl)benzamide (3ao).** The reaction was performed following General Procedure B with benzamide **1a** (12.1 mg, 0.1 mmol), KO<sup>t</sup>Bu (33.7 mg, 0.3 mmol), and *tert*-butyl benzoyl(methyl)carbamate **2o** (23.5 mg, 0.1 mmol) dissolved

in DME (1 mL) at 100 °C for 12 h. The crude material was purified by flash chromatography on silica gel (eluted with hexanes:EtOAc = 10:1) to give the product (9.6 mg, 54% yield) as a white solid.  $^1\text{H}$  NMR (500 MHz,  $\text{CDCl}_3$ ):  $\delta$  9.50 (s, 1H), 8.67 (s, 1H), 7.98 – 7.96 (m, 2H), 7.60 – 7.57 (m, 1H), 7.50 – 7.47 (m, 2H), 2.95 (d,  $J$  = 4.5 Hz, 3H). The NMR spectral data match the previously published data.<sup>5</sup>

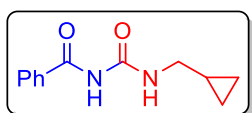

***N*-(cyclopropylmethyl)carbamoyl)benzamide (3ap).** The reaction was performed following General Procedure B with benzamide **1a** (12.1 mg, 0.1 mmol), KO<sup>t</sup>Bu (33.7 mg, 0.3 mmol), and *tert*-butyl

benzoyl(cyclopropylmethyl)carbamate **2p** (27.5 mg, 0.1 mmol) dissolved in DME (1 mL) at 100 °C for 12 h. The crude material was purified by flash chromatography on silica gel (eluted with hexanes:EtOAc = 10:1) to give the product (16.4 mg, 75% yield) as a white solid. mp: 123–126 °C;  $^1\text{H}$  NMR (500 MHz,  $\text{DMSO-}d_6$ ):  $\delta$  10.65 (s, 1H), 8.72 (t,  $J$  = 6.0 Hz, 1H), 7.92 – 7.91 (m, 2H), 7.58 – 7.56 (m, 1H), 7.48 – 7.45 (m, 2H), 3.07 (dd,  $J$  = 7.0, 6.0 Hz, 2H), 1.02 – 0.95 (m, 1H), 0.43 – 0.40 (m, 2H), 0.20 – 0.17 (m, 2H);  $^{13}\text{C}\{^1\text{H}\}$  NMR (125 MHz,  $\text{DMSO-}d_6$ ):  $\delta$  168.3, 153.5, 132.74, 132.72, 128.5, 128.1, 43.6, 11.0, 3.2; IR (thin film): 3321, 1694, 1667, 1273, 1026, 701  $\text{cm}^{-1}$ ; HRMS (ESI)  $m/z$ :  $[\text{M} + \text{Na}]^+$  calcd for  $\text{C}_{12}\text{H}_{14}\text{N}_2\text{NaO}_2$  241.0947; found 241.0948.

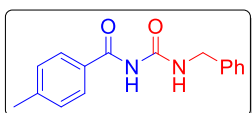

***N*-(benzylcarbamoyl)-4-methylbenzamide (3bb).** The reaction was performed following General Procedure B with 4-methylbenzamide **1b** (13.5 mg, 0.1 mmol), KO<sup>t</sup>Bu (33.7 mg, 0.3 mmol), and *tert*-butyl

benzoyl(benzyl)carbamate **2b** (31.1 mg, 0.1 mmol) dissolved in DME (1 mL) at 100 °C for 12 h. The crude material was purified by flash chromatography on silica gel (eluted with hexanes:EtOAc = 10:1) to give the product (20.1 mg, 75% yield) as a white solid.  $^1\text{H}$  NMR (500 MHz,  $\text{DMSO-}d_6$ ):  $\delta$  10.67 (s, 1H), 9.07 (t,  $J$  = 6.0 Hz, 1H), 7.86 – 7.84 (m, 2H), 7.33 – 7.26 (m, 6H), 7.24 – 7.21 (m, 1H), 4.42 (d,  $J$  = 6.0 Hz, 2H), 2.32 (s, 3H). The NMR spectral data match the previously published data.<sup>6</sup>



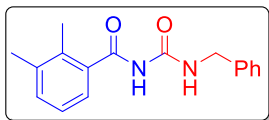

***N*-(benzylcarbamoyl)-2,3-dimethylbenzamide (3cb).** The reaction was performed following General Procedure B with 2,3-dimethylbenzamide **1c** (14.9 mg, 0.1 mmol), KO<sup>t</sup>Bu (33.7 mg, 0.3 mmol), and *tert*-butyl benzoyl(benzyl)carbamate **2b** (31.1 mg, 0.1 mmol) dissolved in DME (1 mL) at 100 °C for 12 h. The crude material was purified by flash chromatography on silica gel (eluted with hexanes:EtOAc = 10:1) to give the product (14.1 mg, 50% yield) as a white solid. mp: 164–167 °C; <sup>1</sup>H NMR (500 MHz, CDCl<sub>3</sub>): δ 8.85 (s, 1H), 8.67 (t, *J* = 6.0 Hz, 1H), 7.29 – 7.24 (m, 4H), 7.23 – 7.18 (m, 3H), 7.06 – 7.03 (m, 1H), 4.42 (d, *J* = 6.0 Hz, 2H), 2.25 (s, 3H), 2.22 (s, 3H); <sup>13</sup>C{<sup>1</sup>H} NMR (125 MHz, CDCl<sub>3</sub>): δ 171.5, 153.9, 138.5, 138.2, 135.1, 134.75, 132.8, 128.8, 127.9, 127.6, 125.7, 124.8, 43.9, 20.4, 16.5; IR (thin film): 3268, 2935, 1712, 1667, 1549, 1300, 745, 700 cm<sup>-1</sup>; HRMS (ESI) *m/z*: [M + Na]<sup>+</sup> calcd for C<sub>17</sub>H<sub>18</sub>N<sub>2</sub>NaO<sub>2</sub> 305.1260; found 305.1267.

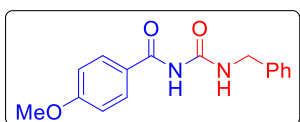

***N*-(benzylcarbamoyl)-4-methoxybenzamide (3db).** The reaction was performed following General Procedure B with 4-methoxybenzamide **1d** (15.1 mg, 0.1 mmol), KO<sup>t</sup>Bu (33.7 mg, 0.3 mmol), and *tert*-butyl benzoyl(benzyl)carbamate **2b** (31.1 mg, 0.1 mmol) dissolved in DME (1 mL) at 100 °C for 12 h. The crude material was purified by flash chromatography on silica gel (eluted with hexanes:EtOAc = 10:1) to give the product (25.0 mg, 88% yield) as a white solid. mp: 176–178 °C; <sup>1</sup>H NMR (500 MHz, DMSO-*d*<sub>6</sub>): δ 10.61 (s, 1H), 9.12 (t, *J* = 6.0 Hz, 1H), 7.99 – 7.97 (m, 2H), 7.35 – 7.30 (m, 4H), 7.26 – 7.24 (m, 1H), 7.03 – 7.01 (m, 2H), 4.43 (d, *J* = 6.0 Hz, 2H), 3.82 (s, 3H); <sup>13</sup>C{<sup>1</sup>H} NMR (125 MHz, DMSO-*d*<sub>6</sub>): δ 167.5, 162.9, 153.9, 139.3, 130.3, 128.4, 127.2, 126.9, 124.4, 113.8, 55.5, 42.7; IR (thin film): 3224, 2930, 1710, 1655, 1543, 1311, 844, 702 cm<sup>-1</sup>; HRMS (ESI) *m/z*: [M + Na]<sup>+</sup> calcd for C<sub>16</sub>H<sub>16</sub>N<sub>2</sub>NaO<sub>3</sub> 307.1053; found 307.1060.

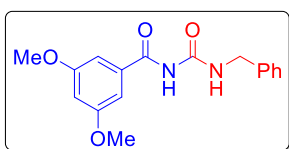

***N*-(benzylcarbamoyl)-3,5-dimethoxybenzamide (3eb).** The reaction was performed following General Procedure B with 3,5-dimethoxybenzamide **1e** (18.1 mg, 0.1 mmol), KO<sup>t</sup>Bu (33.7 mg, 0.3 mmol), and *tert*-butyl benzoyl(benzyl)carbamate **2b** (31.1 mg, 0.1 mmol) dissolved in DME (1 mL) at 100 °C for 12 h. The crude material was purified by flash chromatography on silica gel (eluted with hexanes:EtOAc = 5:1) to give the product (17.9 mg, 57% yield) as a white solid. mp: 131–132 °C; <sup>1</sup>H NMR (500 MHz, CDCl<sub>3</sub>): δ 9.80 (s, 1H), 9.09 (t, *J* = 6.0 Hz, 1H), 7.26 – 7.25 (m, 4H), 7.22 – 7.18 (m, 1H), 7.06 – 7.05 (m, 2H), 6.56 – 7.55 (m, 1H), 4.49 (d, *J* = 6.0 Hz, 2H), 3.71 (s, 6H); <sup>13</sup>C{<sup>1</sup>H} NMR (125

MHz, CDCl<sub>3</sub>):  $\delta$  168.4, 161.1, 138.1, 134.5, 128.8, 127.7, 127.6, 105.8, 105.5, 55.7, 43.9, one resonance was not observed due to coincidental overlap; IR (thin film): 3283, 2936, 1691, 1663, 1530, 1308, 768, 699 cm<sup>-1</sup>; HRMS (ESI) m/z: [M + Na]<sup>+</sup> calcd for C<sub>17</sub>H<sub>18</sub>N<sub>2</sub>NaO<sub>4</sub> 337.1159; found 337.1154.

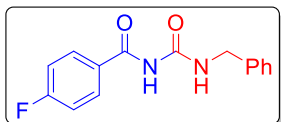

**N-(benzylcarbamoyl)-4-fluorobenzamide (3fb).** The reaction was performed following General Procedure B with 4-fluorobenzamide **1f** (13.9 mg, 0.1 mmol), KO<sup>t</sup>Bu (33.7 mg, 0.3 mmol), and *tert*-butyl benzoyl(benzyl)carbamate **2b** (31.1 mg, 0.1 mmol) dissolved in DME (1 mL) at 100 °C for 12 h. The crude material was purified by flash chromatography on silica gel (eluted with hexanes:EtOAc = 10:1) to give the product (22.0 mg, 81% yield) as a white solid. mp: 163–164 °C; <sup>1</sup>H NMR (500 MHz, DMSO-*d*<sub>6</sub>):  $\delta$  10.79 (s, 1H), 9.02 (t, *J* = 6.0 Hz, 1H), 8.03 – 8.00 (m, 2H), 7.32 – 7.28 (m, 6H), 7.24 – 7.20 (m, 1H), 4.42 (d, *J* = 6.0 Hz, 2H); <sup>13</sup>C{<sup>1</sup>H} NMR (125 MHz, DMSO-*d*<sub>6</sub>):  $\delta$  167.2, 164.8 (d, *J*<sup>1</sup> = 250.9 Hz), 153.6, 139.2, 131.1 (d, *J*<sup>3</sup> = 9.4 Hz), 129.1 (d, *J*<sup>4</sup> = 2.8 Hz), 128.5, 127.3, 127.0, 115.6 (d, *J*<sup>2</sup> = 22.0 Hz), 42.8; IR (thin film): 3291, 2925, 1689, 1659, 1545, 1475, 1238, 765, 701 cm<sup>-1</sup>; HRMS (ESI) m/z: [M + Na]<sup>+</sup> calcd for C<sub>15</sub>H<sub>13</sub>FN<sub>2</sub>NaO<sub>2</sub> 295.0853; found 295.0823.

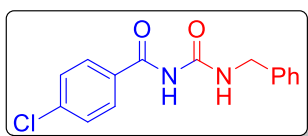

**N-(benzylcarbamoyl)-4-chlorobenzamide (3gb).** The reaction was performed following General Procedure B with 4-chlorobenzamide **1g** (15.5 mg, 0.1 mmol), KO<sup>t</sup>Bu (33.7 mg, 0.3 mmol), and *tert*-butyl benzoyl(benzyl)carbamate **2b** (31.1 mg, 0.1 mmol) dissolved in DME (1 mL) at 100 °C for 12 h. The crude material was purified by flash chromatography on silica gel (eluted with hexanes:EtOAc = 10:1) to give the product (21.3 mg, 74% yield) as a white solid. <sup>1</sup>H NMR (500 MHz, DMSO-*d*<sub>6</sub>):  $\delta$  11.00 (s, 1H), 8.94 (t, *J* = 6.0 Hz, 1H), 8.05 – 8.04 (m, 2H), 7.96 – 7.94 (m, 2H), 7.33 – 7.29 (m, 4H), 7.25 – 7.21 (m, 1H), 4.42 (d, *J* = 6.0 Hz, 2H). The NMR spectral data match the previously published data.<sup>6</sup>

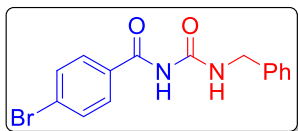

**N-(benzylcarbamoyl)-4-bromobenzamide (3hb).** The reaction was performed following General Procedure B with 4-bromobenzamide **1h** (18.9 mg, 0.1 mmol), KO<sup>t</sup>Bu (33.7 mg, 0.3 mmol), and *tert*-butyl benzoyl(benzyl)carbamate **2b** (31.1 mg, 0.1 mmol) dissolved in DME (1 mL) at 100 °C for 12 h. The crude material was purified by flash chromatography on silica gel (eluted with hexanes:EtOAc = 10:1) to give the product (18.9 mg, 57% yield) as a white solid. mp: 198–201 °C; <sup>1</sup>H NMR (500 MHz, DMSO-*d*<sub>6</sub>):  $\delta$  10.84 (s, 1H), 8.99 (t, *J* = 6.0 Hz, 1H), 7.87 – 7.86 (m, 2H), 7.70 – 7.68 (m, 2H), 7.34 – 7.29 (m, 4H), 7.25 – 7.22 (m, 1H), 4.42 (d, *J* = 6.0 Hz, 2H); <sup>13</sup>C{<sup>1</sup>H} NMR (125 MHz, DMSO-*d*<sub>6</sub>):  $\delta$  167.5, 153.6,

139.2, 131.8, 131.6, 130.3, 128.4, 127.3, 127.0, 126.7, 42.8; IR (thin film): 3286, 2933, 1692, 1661, 1547, 1270, 747, 698, 599  $\text{cm}^{-1}$ ; HRMS (ESI)  $m/z$ :  $[M + \text{Na}]^+$  calcd for  $\text{C}_{15}\text{H}_{13}\text{BrN}_2\text{NaO}_2$  355.0053; found 355.0064.

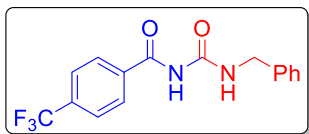

***N*-(benzylcarbamoyl)-4-(trifluoromethyl)benzamide (3ib).** The reaction was performed following General Procedure B with 4-(trifluoromethyl)benzamide **1i** (18.9 mg, 0.1 mmol), KO<sup>t</sup>Bu (33.7 mg, 0.3 mmol), and *tert*-butyl benzoyl(benzyl)carbamate **2b** (31.1 mg, 0.1 mmol) dissolved in DME (1 mL) at 100 °C for 12 h. The crude material was purified by flash chromatography on silica gel (eluted with hexanes:EtOAc = 10:1) to give the product (18.0 mg, 56% yield) as a white solid. mp: 107–110 °C; <sup>1</sup>H NMR (500 MHz, DMSO-*d*<sub>6</sub>):  $\delta$  11.01 (s, 1H), 8.99 (t,  $J$  = 6.0 Hz, 1H), 8.12 – 8.11 (m, 2H), 7.87 – 7.85 (m, 2H), 7.33 – 7.32 (m, 4H), 7.27 – 7.22 (m, 1H), 4.44 (d,  $J$  = 6.0 Hz, 2H); <sup>13</sup>C{<sup>1</sup>H} NMR (125 MHz, DMSO-*d*<sub>6</sub>):  $\delta$  167.4, 153.5, 139.2, 136.6, 132.3 (q,  $J^{\text{C(Ar)-F}}$  = 32.0 Hz), 129.2, 128.5, 127.4, 127.1, 125.5 (q,  $J^{\text{C(Ar)-F}}$  = 3.7 Hz), 123.8 (q,  $J^{\text{C-F}}$  = 272.6 Hz), 42.9; IR (thin film): 3315, 2929, 1693, 1673, 1546, 1296, 724  $\text{cm}^{-1}$ ; HRMS (ESI)  $m/z$ :  $[M + \text{Na}]^+$  calcd for  $\text{C}_{16}\text{H}_{13}\text{F}_3\text{N}_2\text{NaO}_2$  345.0821; found 345.0830.

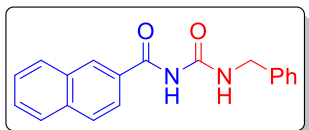

***N*-(benzylcarbamoyl)-2-naphthamide (3jb).** The reaction was performed following General Procedure B with 2-naphthamide **1j** (17.1 mg, 0.1 mmol), KO<sup>t</sup>Bu (33.7 mg, 0.3 mmol), and *tert*-butyl benzoyl(benzyl)carbamate **2b** (31.1 mg, 0.1 mmol) dissolved in DME (1 mL) at 100 °C for 12 h. The crude material was purified by flash chromatography on silica gel (eluted with hexanes:EtOAc = 10:1) to give the product (25.8 mg, 85% yield) as a white solid. mp: 162–164 °C; <sup>1</sup>H NMR (500 MHz, DMSO-*d*<sub>6</sub>):  $\delta$  10.89 (s, 1H), 9.10 (t,  $J$  = 6.0 Hz, 1H), 8.63 (s, 1H), 8.02 – 7.94 (m, 4H), 7.65 – 7.57 (m, 2H), 7.33 – 7.31 (m, 4H), 7.26 – 7.21 (m, 1H), 4.45 (d,  $J$  = 6.0 Hz, 2H); <sup>13</sup>C{<sup>1</sup>H} NMR (125 MHz, DMSO-*d*<sub>6</sub>):  $\delta$  168.5, 153.8, 139.3, 134.8, 131.9, 129.9, 129.4, 128.6, 128.5, 128.2, 127.7, 127.3, 127.10, 127.07, 124.3, 42.8, one resonance was not observed due to coincidental overlap; IR (thin film): 3294, 2928, 1686, 1664, 1560, 1293, 775, 698  $\text{cm}^{-1}$ ; HRMS (ESI)  $m/z$ :  $[M + \text{Na}]^+$  calcd for  $\text{C}_{19}\text{H}_{16}\text{N}_2\text{NaO}_2$  327.1104; found 327.1116.

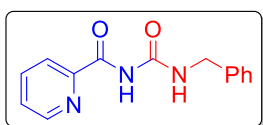

***N*-(benzylcarbamoyl)picolinamide (3kb).** The reaction was performed following General Procedure B with picolinamide **1k** (12.2 mg, 0.1 mmol), KO<sup>t</sup>Bu (33.7 mg, 0.3 mmol), and *tert*-butyl benzoyl(benzyl)carbamate **2b** (31.1 mg, 0.1 mmol) dissolved in DME (1 mL) at 100 °C for 12 h. The crude material was purified by

flash chromatography on silica gel (eluted with hexanes:EtOAc = 5:1) to give the product (12.8 mg, 50% yield) as a white solid. mp: 180–183 °C; <sup>1</sup>H NMR (500 MHz, CDCl<sub>3</sub>): δ 10.82 (s, 1H), 9.13 (t, *J* = 6.0 Hz, 1H), 8.64–8.62 (m, 2H), 7.81–7.79 (m, 2H), 7.32–7.19 (m, 5H), 4.50 (d, *J* = 6.0 Hz, 2H); <sup>13</sup>C{<sup>1</sup>H} NMR (125 MHz, CDCl<sub>3</sub>): δ 167.0, 154.9, 153.4, 150.6, 139.5, 137.7, 128.8, 128.4, 127.7, 127.2, 121.6, 43.9; IR (thin film): 3293, 3030, 2922, 1686, 1665, 1560, 1508, 1283, 760, 695 cm<sup>-1</sup>; HRMS (ESI) *m/z*: [M + Na]<sup>+</sup> calcd for C<sub>14</sub>H<sub>13</sub>N<sub>3</sub>NaO<sub>2</sub> 278.0900; found 278.0910.

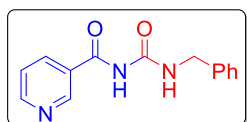

***N*-(benzylcarbamoyl)nicotinamide (31b).** The reaction was performed following General Procedure B with nicotinamide **11** (12.2 mg, 0.1 mmol), KO<sup>t</sup>Bu (33.7 mg, 0.3 mmol), and *tert*-butyl benzoyl(benzyl)carbamate **2b** (31.1 mg, 0.1 mmol) dissolved in DME (1 mL) at 100 °C for 12 h. The crude material was purified by flash chromatography on silica gel (eluted with hexanes:EtOAc = 5:1) to give the product (14.8 mg, 58% yield) as a white solid. mp: 163–165 °C; <sup>1</sup>H NMR (500 MHz, CDCl<sub>3</sub>): δ 10.80 (s, 1H), 9.19 (s, 1H), 9.14 (t, *J* = 6.0 Hz, 1H), 8.72–8.70 (m, 1H), 8.28–8.26 (m, 1H), 7.27–7.26 (m, 4H), 7.25–7.19 (m, 2H), 4.49 (d, *J* = 6.0 Hz, 2H); <sup>13</sup>C NMR (125 MHz, CDCl<sub>3</sub>): δ 168.4, 154.5, 136.8, 133.40, 133.35, 132.4, 129.03, 128.96, 128.95, 127.9, 43.3, one resonance was not observed due to coincidental overlap; IR (thin film): 3295, 3032, 2920, 1687, 1666, 1561, 1508, 1280, 860, 759, 707, 693 cm<sup>-1</sup>; HRMS (ESI) *m/z*: [M + Na]<sup>+</sup> calcd for C<sub>14</sub>H<sub>13</sub>N<sub>3</sub>NaO<sub>2</sub> 278.0900; found 278.0909.

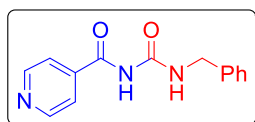

***N*-(benzylcarbamoyl)isonicotinamide (3mb).** The reaction was performed following General Procedure B with isonicotinamide **1m** (12.2 mg, 0.1 mmol), KO<sup>t</sup>Bu (33.7 mg, 0.3 mmol), and *tert*-butyl benzoyl(benzyl)carbamate **2b** (31.1 mg, 0.1 mmol) dissolved in DME (1 mL) at 100 °C for 12 h. The crude material was purified by flash chromatography on silica gel (eluted with hexanes:EtOAc = 5:1) to give the product (13.8 mg, 54% yield) as a white solid. mp: 154–156 °C; <sup>1</sup>H NMR (500 MHz, DMSO-*d*<sub>6</sub>): δ 10.03 (s, 1H), 8.74 (t, *J* = 6.0 Hz, 1H), 8.68–8.66 (m, 1H), 8.11–8.03 (m, 2H), 7.70–7.67 (m, 1H), 7.32–7.29 (m, 4H), 7.24–7.20 (m, 1H), 4.41 (d, *J* = 6.0 Hz, 2H); <sup>13</sup>C{<sup>1</sup>H} NMR (125 MHz, CDCl<sub>3</sub>): δ 168.2, 154.4, 136.6, 133.3, 133.2, 133.21, 128.9, 128.8, 127.8, 43.2; IR (thin film): 3293, 3038, 2920, 1687, 1660, 1561, 1510, 1281, 860, 760, 710, 693 cm<sup>-1</sup>; HRMS (ESI) *m/z*: [M + Na]<sup>+</sup> calcd for C<sub>14</sub>H<sub>13</sub>N<sub>3</sub>NaO<sub>2</sub> 278.0900; found 278.0895.

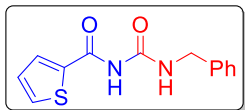

***N*-(benzylcarbamoyl)thiophene-2-carboxamide (3nb)**. The reaction was performed following General Procedure B with thiophene-2-carboxamide **1n** (12.7 mg, 0.1 mmol), KO<sup>t</sup>Bu (33.7 mg, 0.3 mmol), and *tert*-butyl benzoyl(benzyl)carbamate **2b** (31.1 mg, 0.1 mmol) dissolved in DME (1 mL) at 100 °C for 12 h. The crude material was purified by flash chromatography on silica gel (eluted with hexanes:EtOAc = 10:1) to give the product (19.5 mg, 75% yield) as a white solid. <sup>1</sup>H NMR (500 MHz, DMSO-*d*<sub>6</sub>): δ 10.85 (s, 1H), 8.89 (t, *J* = 6.0 Hz, 1H), 8.18 (dd, *J* = 4.0, 1.0 Hz, 1H), 7.94 (dd, *J* = 5.0, 1.0 Hz, 1H), 7.34 – 7.26 (m, 4H), 7.26 – 7.20 (m, 1H), 7.18 (dd, *J* = 5.0, 4.0 Hz, 1H), 4.41 (d, *J* = 6.0 Hz, 2H). The NMR spectral data match the previously published data.<sup>6</sup>

### Characterization Data for Imides

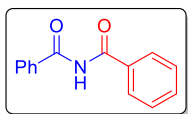

**N-benzoylbenzamide (4ab).** The reaction was performed following General Procedure C with benzamide **1a** (12.1 mg, 0.1 mmol), LiOH (7.2 mg, 0.3 mmol), and *tert*-butyl benzoyl(benzyl)carbamate **2b** (31.1 mg, 0.1 mmol) dissolved in DME (1 mL) at 100 °C. The crude material was purified by flash chromatography on silica gel (eluted with hexanes:EtOAc = 5:1) to give the product (16.7 mg, 74% yield) as a white solid. <sup>1</sup>H NMR (500 MHz, DMSO-*d*<sub>6</sub>): δ 11.32 (s, 1H), 7.90 – 7.89 (m, 4H), 7.62 – 7.60 (m, 2H), 7.51 – 7.49 (m, 4H). The NMR spectral data match the previously published data.<sup>7</sup>

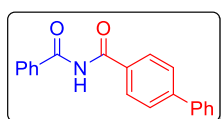

**N-benzoyl-[1,1'-biphenyl]-4-carboxamide (4ab').** The reaction was performed following General Procedure C with benzamide **1a** (12.1 mg, 0.1 mmol), LiOH (7.2 mg, 0.3 mmol), and *tert*-butyl ([1,1'-biphenyl]-4-carbonyl)(benzyl)carbamate **2b'** (38.7 mg, 0.1 mmol) dissolved in DME (1 mL) at 100 °C. The crude material was purified by flash chromatography on silica gel (eluted with hexanes:EtOAc = 5:1) to give the product (23.2 mg, 77% yield) as a white solid. <sup>1</sup>H NMR (500 MHz, DMSO-*d*<sub>6</sub>): δ 11.34 (s, 1H), 7.99 – 7.96 (m, 2H), 7.90 – 7.88 (m, 2H), 7.80 – 7.77 (m, 2H), 7.72 – 7.70 (m, 2H), 7.62 – 7.58 (m, 1H), 7.51 – 7.46 (m, 4H), 7.41 – 7.37 (m, 1H). The NMR spectral data match the previously published data.<sup>8</sup>

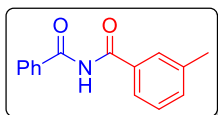

**N-benzoyl-3-methylbenzamide (4ac').** The reaction was performed following General Procedure C with benzamide **1a** (12.1 mg, 0.1 mmol), LiOH (7.2 mg, 0.3 mmol), and *tert*-butyl benzyl(3-methylbenzoyl)carbamate **2c'** (32.5 mg, 0.1 mmol) dissolved in DME (1 mL) at 100 °C. The crude material was purified by flash chromatography on silica gel (eluted with hexanes:EtOAc = 5:1) to give the product (14.1 mg, 59% yield) as a white solid. <sup>1</sup>H NMR (500 MHz, DMSO-*d*<sub>6</sub>): δ 11.25 (s, 1H), 7.89 – 7.87 (m, 2H), 7.72 (s, 1H), 7.69 – 7.68 (m, 1H), 7.62 – 7.59 (m, 1H), 7.51 – 7.48 (m, 2H), 7.42 – 7.36 (m, 2H), 2.36 (s, 3H). The NMR spectral data match the previously published data.<sup>9</sup>

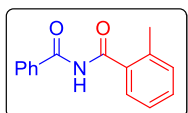

**N-benzoyl-2-methylbenzamide (4ad').** The reaction was performed following General Procedure C with benzamide **1a** (12.1 mg, 0.1 mmol), LiOH (7.2 mg, 0.3 mmol), and *tert*-butyl benzyl(2-methylbenzoyl)carbamate **2d'** (32.5 mg, 0.1 mmol) dissolved in DME (1 mL) at 100 °C. The crude material was purified by flash chromatography on silica gel (eluted with hexanes:EtOAc = 5:1) to give the product (19.8 mg, 83% yield) as a white solid. <sup>1</sup>H NMR (500 MHz, DMSO-*d*<sub>6</sub>): δ 11.42 (s, 1H), 7.91 – 7.89 (m, 2H), 7.62 – 7.59 (m, 1H), 7.51 – 7.44 (m,

3H), 7.39 – 7.35 (m, 1H), 7.28 – 7.21 (m, 2H), 2.35 (s, 3H). The NMR spectral data match the previously published data.<sup>7</sup>

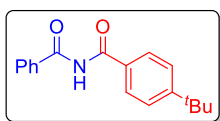

**N-benzoyl-4-(tert-butyl)benzamide (4ae')**. The reaction was performed following General Procedure C with benzamide **1a** (12.1 mg, 0.1 mmol), LiOH (7.2mg, 0.3 mmol), and *tert*-butyl benzyl(4-(*tert*-butyl)benzoyl)carbamate **2e'** (36.7 mg, 0.1 mmol) dissolved in DME (1 mL) at 100 °C. The crude material was purified by flash chromatography on silica gel (eluted with hexanes:EtOAc = 5:1) to give the product (18.0 mg, 64% yield) as a white solid. <sup>1</sup>H NMR (500 MHz, DMSO-*d*<sub>6</sub>): δ 11.22 (s, 1H), 7.88 – 7.87 (m, 2H), 7.84 – 7.82 (m, 2H), 7.61 – 7.59 (m, 1H), 7.52 – 7.48 (m, 4H), 1.29 (s, 9H). The NMR spectral data match the previously published data.<sup>7</sup>

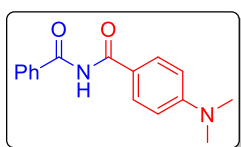

**N-benzoyl-4-(dimethylamino)benzamide (4af')**. The reaction was performed following General Procedure C with benzamide **1a** (12.1 mg, 0.1 mmol), LiOH (7.2 mg, 0.3 mmol), and *tert*-butyl benzyl(4-(dimethylamino)benzoyl)carbamate **2f'** (35.4 mg, 0.1 mmol) dissolved in DME (1 mL) at 100 °C. The crude material was purified by flash chromatography on silica gel (eluted with hexanes:EtOAc = 2:1) to give the product (17.2 mg, 64% yield) as a white solid. <sup>1</sup>H NMR (500 MHz, DMSO-*d*<sub>6</sub>): δ 11.26 (s, 1H), 8.19 – 8.13 (m, 4H), 7.94 – 7.91 (m, 1H), 7.84 – 7.81 (m, 2H), 7.06 – 7.04 (m, 2H), 3.33 (s, 6H). The NMR spectral data match the previously published data.<sup>10</sup>

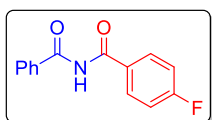

**N-benzoyl-4-fluorobenzamide (4ag')**. The reaction was performed following General Procedure C with benzamide **1a** (12.1 mg, 0.1 mmol), LiOH (7.2 mg, 0.3 mmol), and *tert*-butyl benzyl(4-fluorobenzoyl)carbamate **2g'** (32.9 mg, 0.1 mmol) dissolved in DME (1 mL) at 100 °C. The crude material was purified by flash chromatography on silica gel (eluted with hexanes:EtOAc = 5:1) to give the product (19.9 mg, 82% yield) as a white solid. <sup>1</sup>H NMR (500 MHz, DMSO-*d*<sub>6</sub>): δ 11.26 (s, 1H), 7.92 – 7.90 (m, 2H), 7.83 – 7.81 (m, 2H), 7.56 – 7.53 (m, 1H), 7.45 – 7.42 (m, 2H), 7.28 – 7.25 (m, 2H). The NMR spectral data match the previously published data.<sup>7</sup>

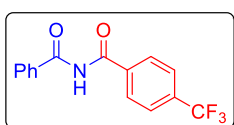

**N-benzoyl-4-(trifluoromethyl)benzamide (4ah')**. The reaction was performed following General Procedure C with benzamide **1a** (12.1 mg, 0.1 mmol), LiOH (7.2 mg, 0.3 mmol), and *tert*-butyl benzyl(4-(trifluoromethyl)benzoyl)carbamate **2h'** (37.9 mg, 0.1 mmol) dissolved in DME (1 mL) at 100 °C. The

crude material was purified by flash chromatography on silica gel (eluted with hexanes:EtOAc = 5:1) to give the product (17.0 mg, 58% yield) as a white solid.  $^1\text{H}$  NMR (500 MHz,  $\text{CDCl}_3$ ):  $\delta$  9.15 (s, 1H), 7.95–7.93 (m, 2H), 7.88–7.87 (m, 2H), 7.74–7.73 (m, 2H), 7.63–7.60 (m, 1H), 7.51–7.49 (m, 2H). The NMR spectral data match the previously published data.<sup>7</sup>

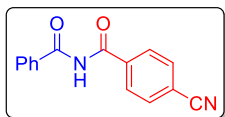

***N*-benzoyl-4-cyanobenzamide (4ai')**. The reaction was performed following General Procedure C with benzamide **1a** (12.1 mg, 0.1 mmol), LiOH (7.2 mg, 0.3 mmol), and *tert*-butyl benzyl(4-cyanobenzoyl)carbamate **2i'** (33.6 mg, 0.1 mmol) dissolved in DME (1 mL) at 100 °C. The crude material was purified by flash chromatography on silica gel (eluted with hexanes:EtOAc = 5:1) to give the product (16.5 mg, 66% yield) as a white solid.  $^1\text{H}$  NMR (500 MHz,  $\text{DMSO}-d_6$ ):  $\delta$  11.58 (s, 1H), 8.05–7.99 (m, 4H), 7.96–7.93 (m, 2H), 7.68–7.64 (m, 1H), 7.56–7.53 (m, 2H). The NMR spectral data match the previously published data.<sup>11</sup>

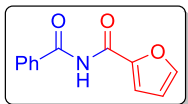

***N*-benzoylfuran-2-carboxamide (4aj')**. The reaction was performed following General Procedure C with benzamide **1a** (12.1 mg, 0.1 mmol), LiOH (7.2 mg, 0.3 mmol), and *tert*-butyl benzyl(furan-2-carbonyl)carbamate **2j'** (30.1 mg, 0.1 mmol) dissolved in DME (1 mL) at 100 °C. The crude material was purified by flash chromatography on silica gel (eluted with hexanes:EtOAc = 5:1) to give the product (11.0 mg, 51% yield) as a white solid.  $^1\text{H}$  NMR (500 MHz,  $\text{DMSO}-d_6$ ):  $\delta$  11.09 (s, 1H), 7.98–7.97 (m, 1H), 7.84–7.82 (m, 2H), 7.62–7.59 (m, 1H), 7.56 (dd,  $J$  = 3.5, 1.0 Hz, 1H), 7.51–7.48 (m, 2H), 6.70 (dd,  $J$  = 3.5, 2.0 Hz, 1H). The NMR spectral data match the previously published data.<sup>7</sup>

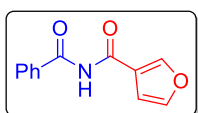

***N*-benzoylfuran-3-carboxamide (4ak')**. The reaction was performed following General Procedure C with benzamide **1a** (12.1 mg, 0.1 mmol), LiOH (7.2 mg, 0.3 mmol), and *tert*-butyl benzyl(furan-3-carbonyl)carbamate **2k'** (30.1 mg, 0.1 mmol) dissolved in DME (1 mL) at 100 °C. The crude material was purified by flash chromatography on silica gel (eluted with hexanes:EtOAc = 5:1) to give the product (10.5 mg, 49% yield) as a colorless oil.  $^1\text{H}$  NMR (500 MHz,  $\text{CDCl}_3$ ):  $\delta$  9.07 (s, 1H), 8.27 (s, 1H), 7.82–7.85 (m, 2H), 7.58–7.56 (m, 1H), 7.49–7.45 (m, 3H), 6.82 (d,  $J$  = 3.0 Hz, 1H);  $^{13}\text{C}$   $\{^1\text{H}\}$  NMR (125 MHz,  $\text{CDCl}_3$ ):  $\delta$  166.9, 162.0, 148.1, 144.0, 133.4, 133.1, 128.8, 128.2, 121.8, 109.7; IR (thin film): 3276, 1717, 1669, 1481, 1157, 759, 707  $\text{cm}^{-1}$ ; HRMS (ESI)  $m/z$ :  $[\text{M} + \text{Na}]^+$  calcd for  $\text{C}_{12}\text{H}_9\text{NNaO}_3$  238.0475; found 238.0480.



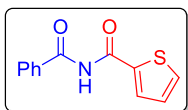

***N*-benzoylthiophene-2-carboxamide (4al')**. The reaction was performed following General Procedure C with benzamide **1a** (12.1 mg, 0.1 mmol), LiOH (7.2 mg, 0.3 mmol), and *tert*-butyl benzyl(thiophene-2-carbonyl)carbamate **2l'** (31.7 mg, 0.1 mmol) dissolved in DME (1 mL) at 100 °C. The crude material was purified by flash chromatography on silica gel (eluted with hexanes:EtOAc = 5:1) to give the product (14.3 mg, 62% yield) as a white solid. <sup>1</sup>H NMR (500 MHz, DMSO-*d*<sub>6</sub>): δ 11.27 (s, 1H), 8.13 (dd, *J* = 4.0, 1.0 Hz, 1H), 7.97 (dd, *J* = 5.0, 1.0 Hz, 1H), 7.85 – 7.84 (m, 2H), 7.63 – 7.60 (m, 1H), 7.52 – 7.50 (m, 2H), 7.22 (dd, *J* = 5.0, 4.0 Hz, 1H). The NMR spectral data match the previously published data.<sup>7</sup>

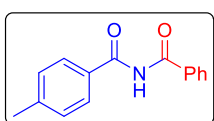

***N*-benzoyl-4-methylbenzamide (4bb)**. The reaction was performed following General Procedure C with 4-methylbenzamide **1b** (13.5 mg, 0.1 mmol), LiOH (7.2 mg, 0.3 mmol), and *tert*-butyl benzoyl(benzyl)carbamate **2b** (31.1 mg, 0.1 mmol) dissolved in DME (1 mL) at 100 °C. The crude material was purified by flash chromatography on silica gel (eluted with hexanes:EtOAc = 5:1) to give the product (20.3 mg, 85% yield) as a white solid. <sup>1</sup>H NMR (500 MHz, DMSO-*d*<sub>6</sub>): δ 11.21 (s, 1H), 7.89 – 7.87 (m, 4H), 7.61 – 7.58 (m, 1H), 7.50 – 7.47 (m, 2H), 7.30 – 7.29 (m, 2H), 2.33 (s, 3H). The NMR spectral data match the previously published data.<sup>9</sup>

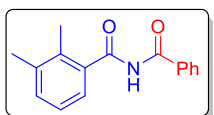

***N*-benzoyl-2,3-dimethylbenzamide (4cb)**. The reaction was performed following General Procedure C with 2,3-dimethylbenzamide **1c** (14.9 mg, 0.1 mmol), LiOH (7.2 mg, 0.3 mmol), and *tert*-butyl benzoyl(benzyl)carbamate **2b** (31.1 mg, 0.1 mmol) dissolved in DME (1 mL) at 100 °C. The crude material was purified by flash chromatography on silica gel (eluted with hexanes:EtOAc = 5:1) to give the product (15.2 mg, 60% yield) as a white solid. mp: 139–141 °C; <sup>1</sup>H NMR (500 MHz, DMSO-*d*<sub>6</sub>): δ 11.43 (s, 1H), 7.91 – 7.88 (m, 2H), 7.62 – 7.59 (m, 1H), 7.50 – 7.47 (m, 2H), 7.26 – 7.22 (m, 2H), 7.15 – 7.12 (m, 1H), 2.26 (s, 3H), 2.22 (s, 3H); <sup>13</sup>C{<sup>1</sup>H} NMR (125 MHz, DMSO-*d*<sub>6</sub>): δ 170.9, 166.6, 137.1, 137.0, 133.4, 133.2, 132.8, 131.1, 128.6, 128.4, 125.3, 124.7, 19.8, 16.1; IR (thin film): 3245, 2919, 1719, 1679, 1511, 1384, 1241, 1150, 704 cm<sup>-1</sup>; HRMS (ESI) *m/z*: [M + Na]<sup>+</sup> calcd for C<sub>16</sub>H<sub>15</sub>NNaO<sub>2</sub> 276.0995; found 276.1005.

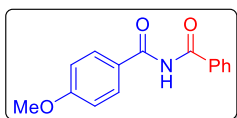

***N*-benzoyl-4-methoxybenzamide (4db)**. The reaction was performed following General Procedure C with 4-methoxybenzamide **1d** (14.9 mg, 0.1 mmol), LiOH (7.2 mg, 0.3 mmol), and *tert*-butyl benzoyl(benzyl)carbamate **2b** (31.1 mg, 0.1 mmol) dissolved in DME (1 mL) at 100 °C. The crude material was purified by flash chromatography on silica gel (eluted with hexanes:EtOAc = 5:1) to give the product (17.9 mg, 70% yield)

as a white solid.  $^1\text{H}$  NMR (500 MHz,  $\text{DMSO-}d_6$ ):  $\delta$  11.14 (s, 1H), 7.90 – 7.85 (m, 4H), 7.60 – 7.58 (m, 1H), 7.50 – 7.47 (m, 2H), 7.03 – 7.01 (m, 2H), 3.81 (s, 3H). The NMR spectral data match the previously published data.<sup>7</sup>

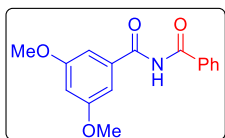

***N*-benzoyl-3,5-dimethoxybenzamide (4eb).** The reaction was performed following General Procedure C with 3,5-dimethoxybenzamide **1e** (18.1 mg, 0.1 mmol), LiOH (7.2 mg, 0.3 mmol), and *tert*-butyl benzoyl(benzyl)carbamate **2b** (31.1 mg, 0.1 mmol) dissolved in DME (1 mL) at 100 °C. The crude material was purified by flash chromatography on silica gel (eluted with hexanes:EtOAc = 5:1) to give the product (20.0 mg, 70% yield) as a white solid. mp: 130–132 °C;  $^1\text{H}$  NMR (500 MHz,  $\text{DMSO-}d_6$ ):  $\delta$  11.27 (s, 1H), 7.90 – 7.88 (m, 2H), 7.66 – 7.62 (m, 1H), 7.54 – 7.51 (m, 2H), 7.10 – 7.09 (m, 2H), 6.77 – 6.76 (m, 1H), 3.78 (s, 6H);  $^{13}\text{C}\{^1\text{H}\}$  NMR (125 MHz,  $\text{DMSO-}d_6$ ):  $\delta$  168.0, 166.9, 160.4, 135.7, 134.0, 132.6, 128.7, 128.4, 106.4, 104.6, 55.6; IR (thin film): 3256, 2939, 1713, 1674, 1597, 1499, 1206, 761, 695  $\text{cm}^{-1}$ ; HRMS (ESI)  $m/z$ :  $[\text{M} + \text{Na}]^+$  calcd for  $\text{C}_{16}\text{H}_{15}\text{NNaO}_4$  308.0893; found 308.0900.

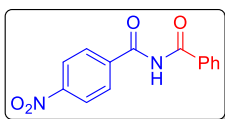

***N*-benzoyl-4-nitrobenzamide (4fb').** The reaction was performed following General Procedure C with 4-nitrobenzamide **1f'** (16.6 mg, 0.1 mmol), LiOH (7.2 mg, 0.3 mmol), and *tert*-butyl benzoyl(benzyl)carbamate **2b** (31.1 mg, 0.1 mmol) dissolved in DME (1 mL) at 100 °C. The crude material was purified by flash chromatography on silica gel (eluted with hexanes:EtOAc = 5:1) to give the product (21.1 mg, 78% yield) as a white solid.  $^1\text{H}$  NMR (500 MHz,  $\text{DMSO-}d_6$ ):  $\delta$  11.62 (s, 1H), 8.31 – 8.29 (m, 2H), 8.08 – 8.06 (m, 2H), 7.93 – 7.91 (m, 2H), 7.64 – 7.61 (m, 1H), 7.53 – 7.50 (m, 2H). The NMR spectral data match the previously published data.<sup>7</sup>

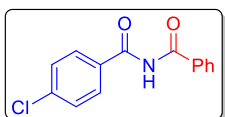

***N*-benzoyl-4-chlorobenzamide (4gb).** The reaction was performed following General Procedure C with 4-chlorobenzamide **1g** (15.5 mg, 0.1 mmol), LiOH (7.2 mg, 0.3 mmol), and *tert*-butyl benzoyl(benzyl)carbamate **2b** (31.1 mg, 0.1 mmol) dissolved in DME (1 mL) at 100 °C. The crude material was purified by flash chromatography on silica gel (eluted with hexanes:EtOAc = 5:1) to give the product (20.8 mg, 80% yield) as a white solid.  $^1\text{H}$  NMR (500 MHz,  $\text{DMSO-}d_6$ ):  $\delta$  11.37 (s, 1H), 7.90 – 7.87 (m, 4H), 7.62 – 7.59 (m, 1H), 7.57 – 7.55 (m, 2H), 7.51 – 7.48 (m, 2H). The NMR spectral data match the previously published data.<sup>7</sup>

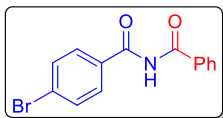

**N-benzoyl-4-bromobenzamide (4hb).** The reaction was performed following General Procedure C with 4-bromobenzamide **1h** (19.9 mg, 0.1 mmol), LiOH (7.2 mg, 0.3 mmol), and *tert*-butyl benzoyl(benzyl)carbamate **2b** (31.1 mg, 0.1 mmol) dissolved in DME (1 mL) at 100 °C. The crude material was purified by flash chromatography on silica gel (eluted with hexanes:EtOAc = 5:1) to give the product (19.6 mg, 65% yield) as a white solid. <sup>1</sup>H NMR (500 MHz, DMSO-*d*<sub>6</sub>): δ 11.37 (s, 1H), 7.89 – 7.88 (m, 2H), 7.83 – 7.81 (m, 2H), 7.72 – 7.70 (m, 2H), 7.63 – 7.60 (m, 1H), 7.51 – 7.48 (m, 2H). The NMR spectral data match the previously published data.<sup>7</sup>

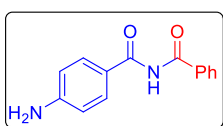

**4-Amino-N-benzoylbenzamide (4ib').** The reaction was performed following General Procedure C with 4-aminobenzamide **1i'** (13.7 mg, 0.1 mmol), LiOH (7.2 mg, 0.3 mmol), and *tert*-butyl benzoyl(benzyl)carbamate **2b** (31.1 mg, 0.1 mmol) dissolved in DME (1 mL) at 100 °C. The crude material was purified by flash chromatography on silica gel (eluted with hexanes:EtOAc = 1:1) to give the product (15.1 mg, 63% yield) as a white solid. <sup>1</sup>H NMR (500 MHz, DMSO-*d*<sub>6</sub>): δ 10.81 (s, 1H), 7.83 – 7.81 (m, 2H), 7.66 – 7.64 (m, 2H), 7.59 – 7.56 (m, 1H), 7.49 – 7.46 (m, 2H), 6.57 – 6.55 (m, 2H), 6.00 (s, 2H). The NMR spectral data match the previously published data.<sup>12</sup>

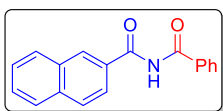

**N-benzoyl-2-naphthamide (4jb).** The reaction was performed following General Procedure C with 2-naphthamide **1j** (17.1 mg, 0.1 mmol), LiOH (7.2 mg, 0.3 mmol), and *tert*-butyl benzoyl(benzyl)carbamate **2b** (31.1 mg, 0.1 mmol) dissolved in DME (1 mL) at 100 °C. The crude material was purified by flash chromatography on silica gel (eluted with hexanes:EtOAc = 5:1) to give the product (22.6 mg, 82% yield) as a white solid. <sup>1</sup>H NMR (500 MHz, DMSO-*d*<sub>6</sub>): δ 11.45 (s, 1H), 8.58 (s, 1H), 8.07 – 8.06 (m, 1H), 8.01 – 7.97 (m, 2H), 7.94 – 7.70 (m, 3H), 7.65 – 7.57 (m, 3H), 7.52 – 7.50 (m, 2H). The NMR spectral data match the previously published data.<sup>7</sup>

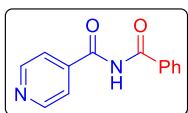

**N-benzoylisonicotinamide (4mb).** The reaction was performed following General Procedure C with isonicotinamide **1m** (12.2 mg, 0.1 mmol), LiOH (7.2 mg, 0.3 mmol), and *tert*-butyl benzoyl(benzyl)carbamate **2b** (31.1 mg, 0.1 mmol) dissolved in DME (1 mL) at 100 °C. The crude material was purified by flash chromatography on silica gel (eluted with hexanes:EtOAc = 5:1) to give the product (15.4 mg, 68% yield) as a white solid. <sup>1</sup>H NMR (500 MHz, DMSO-*d*<sub>6</sub>): δ 11.56 (s, 1H), 8.74 – 8.73 (m, 2H), 7.92 – 7.90 (m, 2H), 7.75 – 7.74 (m, 2H), 7.64 –

7.61 (m, 1H), 7.52 – 7.49 (m, 2H). The NMR spectral data match the previously published data.<sup>7</sup>

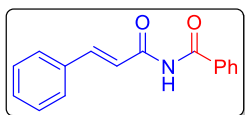

***N*-cinnamoylbenzamide (4nb')**. The reaction was performed following

General Procedure C with cinnamamide **1n'** (14.7 mg, 0.1 mmol), LiOH (7.2

mg, 0.3 mmol), and *tert*-butyl benzoyl(benzyl)carbamate **2b** (31.1 mg, 0.1

mmol) dissolved in DME (1 mL) at 100 °C. The crude material was purified by flash chromatography

on silica gel (eluted with hexanes:EtOAc = 5:1) to give the product (13.0 mg, 52% yield) as a white solid.

<sup>1</sup>H NMR (500 MHz, DMSO-*d*<sub>6</sub>): δ 11.12 (s, 1H), 7.93 – 7.91 (m, 2H), 7.71 – 7.60 (m, 4H), 7.52 – 7.50

(m, 2H), 7.45 – 7.41 (m, 3H), 7.32 – 7.29 (m, 1H). The NMR spectral data match the previously published

data.<sup>7</sup>

## Computational details

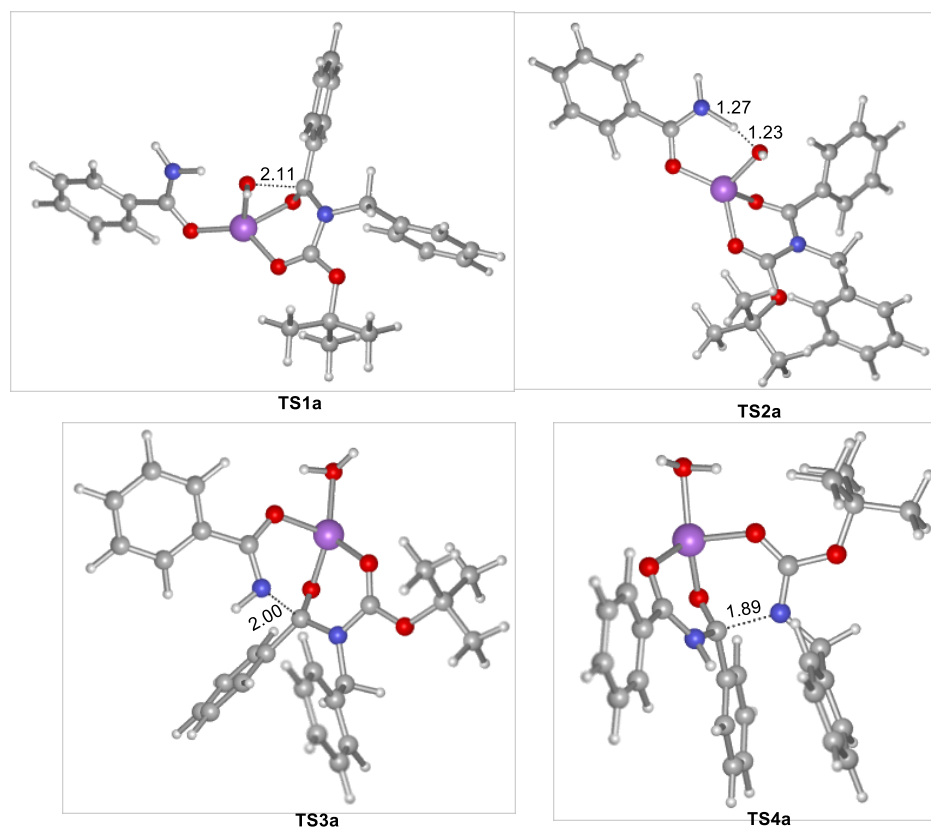

**Supplementary Figure 1.** Optimized 3D structures of the transition states shown in Figure 1. Bond lengths are shown in Å.

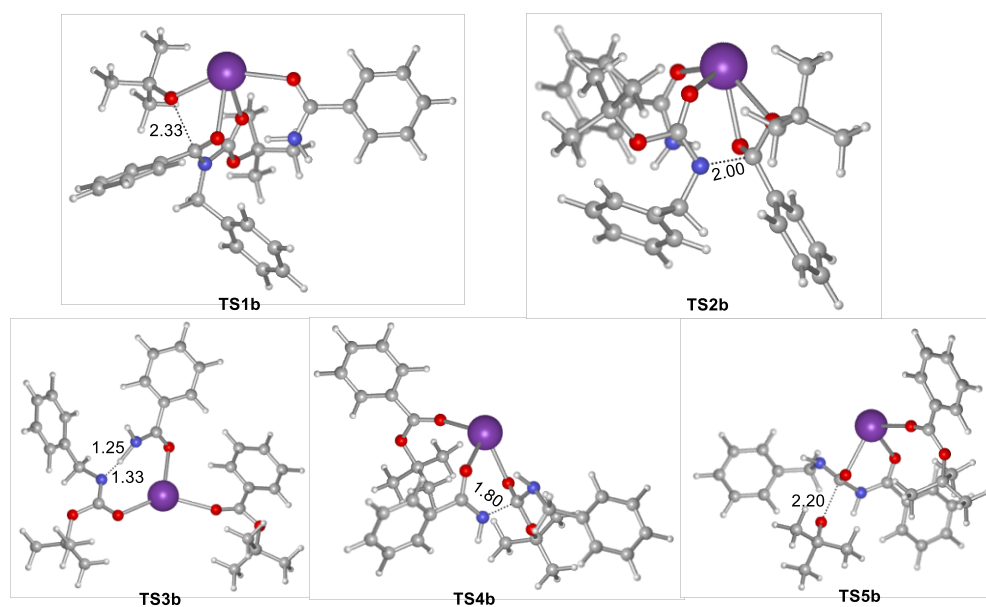

**Supplementary Figure 2.** Optimized 3D structures of the transition states shown in Figure 2. Bond lengths are shown in Å.

## Computational methods

The B3LYP<sup>12</sup> density functional method was employed to carry out all the calculations. The 6-31G(d)<sup>13</sup> basis set was used for all atoms. Vibrational frequency analyses at the same level of the theory were performed on all the optimized geometries to characterize them as local minima (no imaginary frequency) or transition states (one imaginary frequency). In addition, intrinsic reaction coordinate (IRC) calculations were used to verify that the transition state connect with appropriate reactant and product.<sup>14</sup> The gas-phase Gibbs energies for all species were obtained at 298.15 K and 1 atm at their respective optimized structures. Solution phase single-point energies were calculated based on the optimized structures with the M06-2X<sup>Error! Reference source not found.</sup> method, SMD solvation model,<sup>15</sup> and 6-311++G(d,p) basis set. The Gibbs energy was determined by adding the single-point energy and the gas-phase thermal correction to the Gibbs energy obtained from the vibrational frequency analyses. All calculations were carried out with the Gaussian 09 suite of programs.<sup>17</sup> The 3D structures of the optimized intermediates or transition states were demonstrated using the software of CYLView.<sup>19</sup>

## Cartesian Coordinates and Energies

### 1a

| Center Number                                 | Atomic Number | Atomic Type | Coordinates (Angstroms)     |           |           |
|-----------------------------------------------|---------------|-------------|-----------------------------|-----------|-----------|
|                                               |               |             | X                           | Y         | Z         |
| 1                                             | 6             | 0           | -1.718340                   | -0.136625 | -0.034129 |
| 2                                             | 6             | 0           | -0.220321                   | -0.022361 | -0.018635 |
| 3                                             | 6             | 0           | 0.515173                    | -1.207918 | 0.109591  |
| 4                                             | 6             | 0           | 0.460485                    | 1.196958  | -0.143684 |
| 5                                             | 6             | 0           | 1.907128                    | -1.173802 | 0.137667  |
| 6                                             | 1             | 0           | -0.028317                   | -2.144033 | 0.184587  |
| 7                                             | 6             | 0           | 1.854874                    | 1.229660  | -0.123076 |
| 8                                             | 1             | 0           | -0.091870                   | 2.120597  | -0.294005 |
| 9                                             | 6             | 0           | 2.579945                    | 0.045673  | 0.024005  |
| 10                                            | 1             | 0           | 2.469052                    | -2.097628 | 0.245087  |
| 11                                            | 1             | 0           | 2.374463                    | 2.177980  | -0.230328 |
| 12                                            | 1             | 0           | 3.666232                    | 0.072497  | 0.042219  |
| 13                                            | 7             | 0           | -2.420739                   | 1.023584  | 0.207602  |
| 14                                            | 1             | 0           | -3.417687                   | 0.900293  | 0.328241  |
| 15                                            | 1             | 0           | -1.996623                   | 1.768531  | 0.741496  |
| 16                                            | 8             | 0           | -2.287968                   | -1.194104 | -0.272619 |
| Zero-point correction=                        |               |             | 0.128082 (Hartree/Particle) |           |           |
| Thermal correction to Energy=                 |               |             | 0.135541                    |           |           |
| Thermal correction to Enthalpy=               |               |             | 0.136485                    |           |           |
| Thermal correction to Gibbs Free Energy=      |               |             | 0.095884                    |           |           |
| Sum of electronic and zero-point Energies=    |               |             | -400.822970                 |           |           |
| Sum of electronic and thermal Energies=       |               |             | -400.815511                 |           |           |
| Sum of electronic and thermal Enthalpies=     |               |             | -400.814567                 |           |           |
| Sum of electronic and thermal Free Energies=  |               |             | -400.855167                 |           |           |
| M06-2X /6-311++G (d, p)/SMD// B3LYP /6-31G(d) |               |             | energy=-400.905998          |           |           |

### 2a

| Center Number | Atomic Number | Atomic Type | Coordinates (Angstroms) |   |   |
|---------------|---------------|-------------|-------------------------|---|---|
|               |               |             | X                       | Y | Z |

|    |   |   |           |           |           |
|----|---|---|-----------|-----------|-----------|
| 1  | 8 | 0 | 1.405831  | -0.492329 | 2.119963  |
| 2  | 6 | 0 | 1.507079  | -0.440271 | 0.911467  |
| 3  | 6 | 0 | 2.839164  | -0.326572 | 0.238985  |
| 4  | 7 | 0 | 0.361405  | -0.487158 | 0.050143  |
| 5  | 6 | 0 | 3.899791  | 0.227625  | 0.970857  |
| 6  | 6 | 0 | 3.076975  | -0.827273 | -1.049437 |
| 7  | 6 | 0 | -0.679385 | -1.372158 | 0.375065  |
| 8  | 6 | 0 | 0.157353  | 0.591321  | -0.931985 |
| 9  | 6 | 0 | 5.173101  | 0.302160  | 0.413316  |
| 10 | 1 | 0 | 3.705353  | 0.589121  | 1.975435  |
| 11 | 6 | 0 | 4.356324  | -0.764759 | -1.600271 |
| 12 | 1 | 0 | 2.265052  | -1.285826 | -1.605865 |
| 13 | 8 | 0 | -0.575516 | -2.276801 | 1.174482  |
| 14 | 8 | 0 | -1.758719 | -1.089667 | -0.382108 |
| 15 | 1 | 0 | 1.150007  | 0.970761  | -1.191619 |
| 16 | 1 | 0 | -0.270900 | 0.165112  | -1.842511 |
| 17 | 6 | 0 | -0.709650 | 1.745148  | -0.444915 |
| 18 | 6 | 0 | 5.403090  | -0.193748 | -0.873261 |
| 19 | 1 | 0 | 5.988274  | 0.741345  | 0.981563  |
| 20 | 1 | 0 | 4.537298  | -1.165267 | -2.593876 |
| 21 | 6 | 0 | -3.007689 | -1.865001 | -0.246273 |
| 22 | 6 | 0 | -1.345256 | 2.558696  | -1.390909 |
| 23 | 6 | 0 | -0.854039 | 2.048101  | 0.913682  |
| 24 | 1 | 0 | 6.398473  | -0.140489 | -1.306123 |
| 25 | 6 | 0 | -3.558852 | -1.707559 | 1.174225  |
| 26 | 6 | 0 | -2.762339 | -3.329671 | -0.621793 |
| 27 | 6 | 0 | -3.925249 | -1.185302 | -1.265605 |
| 28 | 6 | 0 | -2.104242 | 3.658736  | -0.991664 |
| 29 | 1 | 0 | -1.248204 | 2.327448  | -2.450055 |
| 30 | 6 | 0 | -1.618474 | 3.146364  | 1.313996  |
| 31 | 1 | 0 | -0.379402 | 1.422065  | 1.663682  |
| 32 | 1 | 0 | -4.541776 | -2.187409 | 1.240124  |
| 33 | 1 | 0 | -2.894287 | -2.166429 | 1.907931  |
| 34 | 1 | 0 | -3.679337 | -0.646586 | 1.418074  |
| 35 | 1 | 0 | -2.096068 | -3.814010 | 0.093281  |
| 36 | 1 | 0 | -3.717266 | -3.867032 | -0.635617 |
| 37 | 1 | 0 | -2.320834 | -3.397966 | -1.622343 |
| 38 | 1 | 0 | -4.914357 | -1.655024 | -1.251455 |
| 39 | 1 | 0 | -4.039444 | -0.122146 | -1.032316 |
| 40 | 1 | 0 | -3.514866 | -1.275142 | -2.276969 |
| 41 | 6 | 0 | -2.243588 | 3.956437  | 0.365453  |
| 42 | 1 | 0 | -2.592418 | 4.277972  | -1.739863 |
| 43 | 1 | 0 | -1.724501 | 3.366367  | 2.373124  |
| 44 | 1 | 0 | -2.838074 | 4.809989  | 0.680106  |

-----  
Zero-point correction= 0.364918 (Hartree/Particle)  
Thermal correction to Energy= 0.386512  
Thermal correction to Enthalpy= 0.387456  
Thermal correction to Gibbs Free Energy= 0.312301  
Sum of electronic and zero-point Energies= -1016.760523  
Sum of electronic and thermal Energies= -1016.738929  
Sum of electronic and thermal Enthalpies= -1016.737985  
Sum of electronic and thermal Free Energies= -1016.813140  
M06-2X /6-311++G (d, p)/SMD// B3LYP /6-31G(d) energy=-1016.992929

#### 4aa

| Center<br>Number | Atomic<br>Number | Atomic<br>Type | Coordinates (Angstroms) |           |           |
|------------------|------------------|----------------|-------------------------|-----------|-----------|
|                  |                  |                | X                       | Y         | Z         |
| 1                | 8                | 0              | 1.409386                | 2.322082  | -0.326326 |
| 2                | 6                | 0              | 1.257970                | 1.126831  | -0.178823 |
| 3                | 6                | 0              | 2.425293                | 0.185724  | -0.042391 |
| 4                | 6                | 0              | 2.367403                | -1.183266 | -0.341683 |
| 5                | 6                | 0              | 3.641302                | 0.742279  | 0.378790  |
| 6                | 6                | 0              | 3.501736                | -1.983701 | -0.204329 |

|    |   |   |           |           |           |
|----|---|---|-----------|-----------|-----------|
| 7  | 1 | 0 | 1.453252  | -1.630372 | -0.724183 |
| 8  | 6 | 0 | 4.769925  | -0.059351 | 0.525966  |
| 9  | 1 | 0 | 3.676479  | 1.807156  | 0.583589  |
| 10 | 6 | 0 | 4.701998  | -1.425037 | 0.237235  |
| 11 | 1 | 0 | 3.449077  | -3.040638 | -0.450265 |
| 12 | 1 | 0 | 5.704628  | 0.380082  | 0.862981  |
| 13 | 1 | 0 | 5.583861  | -2.050137 | 0.347966  |
| 14 | 6 | 0 | -1.257964 | 1.126831  | -0.178468 |
| 15 | 6 | 0 | -2.425281 | 0.185694  | -0.042222 |
| 16 | 6 | 0 | -3.641433 | 0.742308  | 0.378469  |
| 17 | 6 | 0 | -2.367266 | -1.183374 | -0.341142 |
| 18 | 6 | 0 | -4.770077 | -0.059317 | 0.525520  |
| 19 | 1 | 0 | -3.676686 | 1.807231  | 0.583006  |
| 20 | 6 | 0 | -3.501606 | -1.983812 | -0.203895 |
| 21 | 1 | 0 | -1.453006 | -1.630581 | -0.723264 |
| 22 | 6 | 0 | -4.702022 | -1.425074 | 0.237170  |
| 23 | 1 | 0 | -5.704892 | 0.380180  | 0.862141  |
| 24 | 1 | 0 | -3.448834 | -3.040815 | -0.449520 |
| 25 | 1 | 0 | -5.583892 | -2.050180 | 0.347808  |
| 26 | 7 | 0 | 0.000011  | 0.504962  | -0.102319 |
| 27 | 1 | 0 | 0.000076  | -0.460205 | 0.194821  |
| 28 | 8 | 0 | -1.409387 | 2.322059  | -0.326177 |

-----  
Zero-point correction= 0.219118 (Hartree/Particle)  
Thermal correction to Energy= 0.232951  
Thermal correction to Enthalpy= 0.233895  
Thermal correction to Gibbs Free Energy= 0.175829  
Sum of electronic and zero-point Energies= -745.116563  
Sum of electronic and thermal Energies= -745.102730  
Sum of electronic and thermal Enthalpies= -745.101786  
Sum of electronic and thermal Free Energies= -745.159852  
M06-2X /6-311++G (d, p)/SMD// B3LYP /6-31G(d) energy=-745.246653

### INT1a

| Center<br>Number | Atomic<br>Number | Atomic<br>Type | Coordinates (Angstroms) |           |           |
|------------------|------------------|----------------|-------------------------|-----------|-----------|
|                  |                  |                | X                       | Y         | Z         |
| 1                | 8                | 0              | -4.177876               | -0.257696 | -0.164735 |
| 2                | 3                | 0              | -3.371476               | 1.187568  | 0.292663  |
| 3                | 1                | 0              | -4.872792               | -0.795196 | 0.232895  |
| 4                | 6                | 0              | -0.961512               | 0.087043  | 0.041659  |
| 5                | 6                | 0              | 0.535294                | 0.004212  | 0.021012  |
| 6                | 6                | 0              | 1.264189                | 1.188804  | -0.149029 |
| 7                | 6                | 0              | 1.224815                | -1.206577 | 0.178993  |
| 8                | 6                | 0              | 2.656568                | 1.160263  | -0.186376 |
| 9                | 1                | 0              | 0.720637                | 2.121779  | -0.252067 |
| 10               | 6                | 0              | 2.618445                | -1.233138 | 0.151650  |
| 11               | 1                | 0              | 0.678442                | -2.128826 | 0.358097  |
| 12               | 6                | 0              | 3.336727                | -0.050722 | -0.037697 |
| 13               | 1                | 0              | 3.212367                | 2.083051  | -0.328612 |
| 14               | 1                | 0              | 3.143047                | -2.175147 | 0.285547  |
| 15               | 1                | 0              | 4.422944                | -0.072522 | -0.061929 |
| 16               | 7                | 0              | -1.679464               | -1.000737 | -0.244089 |
| 17               | 1                | 0              | -1.216398               | -1.825427 | -0.597205 |
| 18               | 8                | 0              | -1.509811               | 1.187589  | 0.329105  |
| 19               | 1                | 0              | -2.763220               | -0.903712 | -0.242319 |

-----  
Zero-point correction= 0.142152 (Hartree/Particle)  
Thermal correction to Energy= 0.152859  
Thermal correction to Enthalpy= 0.153804  
Thermal correction to Gibbs Free Energy= 0.105572  
Sum of electronic and zero-point Energies= -484.240100  
Sum of electronic and thermal Energies= -484.229392  
Sum of electronic and thermal Enthalpies= -484.228448  
Sum of electronic and thermal Free Energies= -484.276679  
M06-2X /6-311++G (d, p)/SMD// B3LYP /6-31G(d) energy=-484.336324



## INT2a

| Center<br>Number | Atomic<br>Number | Atomic<br>Type | Coordinates (Angstroms) |           |           | Z |
|------------------|------------------|----------------|-------------------------|-----------|-----------|---|
|                  |                  |                | X                       | Y         |           |   |
| 1                | 8                | 0              | 1.431691                | 0.545807  | -1.913639 |   |
| 2                | 8                | 0              | 0.325487                | 0.644388  | 0.857450  |   |
| 3                | 6                | 0              | -0.690084               | 0.907226  | 0.232570  |   |
| 4                | 6                | 0              | -1.064011               | 2.338084  | -0.045963 |   |
| 5                | 7                | 0              | -1.543169               | -0.101560 | -0.269749 |   |
| 6                | 6                | 0              | -2.004068               | 3.030143  | 0.725976  |   |
| 7                | 6                | 0              | -0.345675               | 2.993168  | -1.057969 |   |
| 8                | 6                | 0              | -1.115481               | -1.443352 | -0.273424 |   |
| 9                | 6                | 0              | -2.851754               | 0.238154  | -0.862288 |   |
| 10               | 6                | 0              | -2.233207               | 4.385007  | 0.480596  |   |
| 11               | 1                | 0              | -2.550490               | 2.520663  | 1.514290  |   |
| 12               | 6                | 0              | -0.594380               | 4.345013  | -1.298166 |   |
| 13               | 1                | 0              | 0.389129                | 2.416956  | -1.624634 |   |
| 14               | 8                | 0              | 0.042987                | -1.803803 | -0.147631 |   |
| 15               | 8                | 0              | -2.157023               | -2.259469 | -0.451973 |   |
| 16               | 1                | 0              | -2.739672               | 1.210143  | -1.345778 |   |
| 17               | 1                | 0              | -3.048835               | -0.490114 | -1.651295 |   |
| 18               | 6                | 0              | -4.024484               | 0.277451  | 0.105349  |   |
| 19               | 6                | 0              | -1.532769               | 5.041876  | -0.532755 |   |
| 20               | 1                | 0              | -2.958249               | 4.925119  | 1.083469  |   |
| 21               | 1                | 0              | -0.044894               | 4.858364  | -2.083143 |   |
| 22               | 6                | 0              | -1.988621               | -3.733472 | -0.567080 |   |
| 23               | 6                | 0              | -5.231351               | 0.832958  | -0.340813 |   |
| 24               | 6                | 0              | -3.957578               | -0.228539 | 1.406591  |   |
| 25               | 1                | 0              | -1.715343               | 6.096592  | -0.722179 |   |
| 26               | 6                | 0              | -1.422478               | -4.288633 | 0.742073  |   |
| 27               | 6                | 0              | -1.113689               | -4.064473 | -1.778596 |   |
| 28               | 6                | 0              | -3.428820               | -4.201166 | -0.784427 |   |
| 29               | 6                | 0              | -6.347956               | 0.876756  | 0.492125  |   |
| 30               | 1                | 0              | -5.295530               | 1.238116  | -1.348865 |   |
| 31               | 6                | 0              | -5.074039               | -0.179352 | 2.245691  |   |
| 32               | 1                | 0              | -3.031660               | -0.661336 | 1.772241  |   |
| 33               | 1                | 0              | -1.419361               | -5.383240 | 0.696678  |   |
| 34               | 1                | 0              | -0.401879               | -3.944014 | 0.914752  |   |
| 35               | 1                | 0              | -2.049279               | -3.986848 | 1.588073  |   |
| 36               | 1                | 0              | -0.084364               | -3.732996 | -1.634393 |   |
| 37               | 1                | 0              | -1.112078               | -5.148954 | -1.934186 |   |
| 38               | 1                | 0              | -1.516983               | -3.594595 | -2.682295 |   |
| 39               | 1                | 0              | -3.455863               | -5.292554 | -0.865580 |   |
| 40               | 1                | 0              | -4.064882               | -3.897918 | 0.052852  |   |
| 41               | 1                | 0              | -3.842410               | -3.776098 | -1.704649 |   |
| 42               | 6                | 0              | -6.272585               | 0.370096  | 1.791797  |   |
| 43               | 1                | 0              | -7.274812               | 1.312928  | 0.129043  |   |
| 44               | 1                | 0              | -5.002715               | -0.573382 | 3.256071  |   |
| 45               | 1                | 0              | -7.140180               | 0.407572  | 2.444859  |   |
| 46               | 3                | 0              | 1.533506                | -0.479793 | -0.376426 |   |
| 47               | 1                | 0              | 1.393396                | 0.076279  | -2.760678 |   |
| 48               | 6                | 0              | 4.239422                | -0.042757 | -0.343561 |   |
| 49               | 6                | 0              | 5.635827                | -0.079153 | 0.212272  |   |
| 50               | 6                | 0              | 5.812327                | -0.506604 | 1.534632  |   |
| 51               | 6                | 0              | 6.758817                | 0.281654  | -0.544880 |   |
| 52               | 6                | 0              | 7.086000                | -0.547913 | 2.098016  |   |
| 53               | 1                | 0              | 4.936266                | -0.800917 | 2.102912  |   |
| 54               | 6                | 0              | 8.035069                | 0.229501  | 0.015343  |   |
| 55               | 1                | 0              | 6.642645                | 0.573446  | -1.585379 |   |
| 56               | 6                | 0              | 8.200292                | -0.179048 | 1.340209  |   |
| 57               | 1                | 0              | 7.211439                | -0.870888 | 3.128158  |   |
| 58               | 1                | 0              | 8.899964                | 0.501076  | -0.584131 |   |
| 59               | 1                | 0              | 9.194419                | -0.216364 | 1.778109  |   |
| 60               | 7                | 0              | 3.972996                | 0.777669  | -1.366556 |   |
| 61               | 1                | 0              | 4.657390                | 1.468404  | -1.638826 |   |

|    |   |   |          |           |           |
|----|---|---|----------|-----------|-----------|
| 62 | 8 | 0 | 3.360687 | -0.783017 | 0.161133  |
| 63 | 1 | 0 | 2.936564 | 0.804171  | -1.714723 |

-----

|                                              |                             |
|----------------------------------------------|-----------------------------|
| Zero-point correction=                       | 0.508536 (Hartree/Particle) |
| Thermal correction to Energy=                | 0.542225                    |
| Thermal correction to Enthalpy=              | 0.543169                    |
| Thermal correction to Gibbs Free Energy=     | 0.438158                    |
| Sum of electronic and zero-point Energies=   | -1501.036682                |
| Sum of electronic and thermal Energies=      | -1501.002994                |
| Sum of electronic and thermal Enthalpies=    | -1501.002050                |
| Sum of electronic and thermal Free Energies= | -1501.107061                |

M06-2X /6-311++G (d, p)/SMD// B3LYP /6-31G(d) energy=-1501.360375

### INT3a

-----

| Center<br>Number | Atomic<br>Number | Atomic<br>Type | Coordinates (Angstroms) |           |           |
|------------------|------------------|----------------|-------------------------|-----------|-----------|
|                  |                  |                | X                       | Y         | Z         |
| 1                | 8                | 0              | 1.675365                | 0.879249  | -2.089646 |
| 2                | 8                | 0              | 0.285408                | 0.939423  | 0.554286  |
| 3                | 6                | 0              | -0.828608               | 1.097298  | 0.078243  |
| 4                | 6                | 0              | -1.363127               | 2.492731  | -0.082946 |
| 5                | 7                | 0              | -1.607294               | 0.011898  | -0.380102 |
| 6                | 6                | 0              | -2.466621               | 2.991980  | 0.620515  |
| 7                | 6                | 0              | -0.607553               | 3.342779  | -0.906172 |
| 8                | 6                | 0              | -1.034896               | -1.278732 | -0.460049 |
| 9                | 6                | 0              | -2.998994               | 0.194342  | -0.838569 |
| 10               | 6                | 0              | -2.818598               | 4.336121  | 0.491352  |
| 11               | 1                | 0              | -3.040201               | 2.343459  | 1.275430  |
| 12               | 6                | 0              | -0.981715               | 4.678321  | -1.044424 |
| 13               | 1                | 0              | 0.255529                | 2.941486  | -1.431408 |
| 14               | 8                | 0              | 0.161376                | -1.510342 | -0.428483 |
| 15               | 8                | 0              | -1.990088               | -2.195085 | -0.600213 |
| 16               | 1                | 0              | -3.073320               | 1.210511  | -1.230136 |
| 17               | 1                | 0              | -3.156643               | -0.483328 | -1.679825 |
| 18               | 6                | 0              | -4.076692               | -0.035304 | 0.210617  |
| 19               | 6                | 0              | -2.082768               | 5.177641  | -0.344563 |
| 20               | 1                | 0              | -3.667135               | 4.724106  | 1.047972  |
| 21               | 1                | 0              | -0.403665               | 5.332414  | -1.691156 |
| 22               | 6                | 0              | -1.674513               | -3.645986 | -0.748103 |
| 23               | 6                | 0              | -5.412222               | 0.169774  | -0.162087 |
| 24               | 6                | 0              | -3.796784               | -0.434286 | 1.520463  |
| 25               | 1                | 0              | -2.363188               | 6.222650  | -0.445551 |
| 26               | 6                | 0              | -0.978597               | -4.147189 | 0.519144  |
| 27               | 6                | 0              | -0.841389               | -3.870414 | -2.011794 |
| 28               | 6                | 0              | -3.069115               | -4.257673 | -0.889339 |
| 29               | 6                | 0              | -6.445016               | -0.020189 | 0.754025  |
| 30               | 1                | 0              | -5.645024               | 0.482729  | -1.178222 |
| 31               | 6                | 0              | -4.831254               | -0.621919 | 2.441598  |
| 32               | 1                | 0              | -2.769102               | -0.600570 | 1.829397  |
| 33               | 1                | 0              | -0.863836               | -5.234901 | 0.458048  |
| 34               | 1                | 0              | 0.010125                | -3.701549 | 0.639431  |
| 35               | 1                | 0              | -1.584255               | -3.920559 | 1.403072  |
| 36               | 1                | 0              | 0.159140                | -3.445901 | -1.916628 |
| 37               | 1                | 0              | -0.745740               | -4.947089 | -2.189597 |
| 38               | 1                | 0              | -1.337995               | -3.428697 | -2.882723 |
| 39               | 1                | 0              | -2.987858               | -5.345580 | -0.979005 |
| 40               | 1                | 0              | -3.684003               | -4.024461 | -0.014780 |
| 41               | 1                | 0              | -3.575264               | -3.874517 | -1.781246 |
| 42               | 6                | 0              | -6.157124               | -0.417003 | 2.062434  |
| 43               | 1                | 0              | -7.474566               | 0.144177  | 0.447519  |
| 44               | 1                | 0              | -4.595059               | -0.930178 | 3.456518  |
| 45               | 1                | 0              | -6.960622               | -0.563557 | 2.778842  |
| 46               | 3                | 0              | 1.640102                | -0.171405 | -0.414554 |
| 47               | 1                | 0              | 1.717804                | 0.321656  | -2.882196 |
| 48               | 6                | 0              | 4.324173                | 0.170777  | -0.367099 |
| 49               | 6                | 0              | 5.682378                | -0.014071 | 0.275960  |

|    |   |   |          |           |           |
|----|---|---|----------|-----------|-----------|
| 50 | 6 | 0 | 5.749338 | -0.519586 | 1.581022  |
| 51 | 6 | 0 | 6.878460 | 0.286115  | -0.390131 |
| 52 | 6 | 0 | 6.978425 | -0.694090 | 2.215231  |
| 53 | 1 | 0 | 4.819191 | -0.771335 | 2.079431  |
| 54 | 6 | 0 | 8.110943 | 0.100367  | 0.236855  |
| 55 | 1 | 0 | 6.848632 | 0.643312  | -1.416471 |
| 56 | 6 | 0 | 8.164508 | -0.384584 | 1.545039  |
| 57 | 1 | 0 | 7.012878 | -1.076514 | 3.232663  |
| 58 | 1 | 0 | 9.029515 | 0.328751  | -0.298338 |
| 59 | 1 | 0 | 9.124176 | -0.526432 | 2.036013  |
| 60 | 7 | 0 | 4.145714 | 1.040729  | -1.340872 |
| 61 | 1 | 0 | 4.970009 | 1.599026  | -1.542265 |
| 62 | 8 | 0 | 3.375473 | -0.555018 | 0.089527  |
| 63 | 1 | 0 | 2.695141 | 1.077601  | -1.881412 |

-----  
Zero-point correction= 0.508635 (Hartree/Particle)  
Thermal correction to Energy= 0.542385  
Thermal correction to Enthalpy= 0.543329  
Thermal correction to Gibbs Free Energy= 0.437847  
Sum of electronic and zero-point Energies= -1501.036211  
Sum of electronic and thermal Energies= -1501.002462  
Sum of electronic and thermal Enthalpies= -1501.001518  
Sum of electronic and thermal Free Energies= -1501.107000  
M06-2X /6-311++G (d, p)/SMD// B3LYP /6-31G(d) energy=-1501.363695

#### INT4a

| Center<br>Number | Atomic<br>Number | Atomic<br>Type | Coordinates (Angstroms) |           |           |
|------------------|------------------|----------------|-------------------------|-----------|-----------|
|                  |                  |                | X                       | Y         | Z         |
| 1                | 8                | 0              | 2.122296                | -2.121601 | -3.410737 |
| 2                | 8                | 0              | 0.186705                | 0.643339  | -2.444760 |
| 3                | 6                | 0              | -0.457150               | 1.185934  | -1.551970 |
| 4                | 6                | 0              | -0.164360               | 2.619863  | -1.222517 |
| 5                | 7                | 0              | -1.521535               | 0.531702  | -0.900823 |
| 6                | 6                | 0              | 0.072613                | 3.080337  | 0.080588  |
| 7                | 6                | 0              | -0.009728               | 3.496543  | -2.306138 |
| 8                | 6                | 0              | -1.756019               | -0.839486 | -1.134948 |
| 9                | 6                | 0              | -2.496654               | 1.255104  | -0.052528 |
| 10               | 6                | 0              | 0.433643                | 4.410390  | 0.291588  |
| 11               | 1                | 0              | 0.003535                | 2.394795  | 0.917040  |
| 12               | 6                | 0              | 0.333345                | 4.829094  | -2.087043 |
| 13               | 1                | 0              | -0.156476               | 3.124075  | -3.315054 |
| 14               | 8                | 0              | -0.969033               | -1.607245 | -1.666890 |
| 15               | 8                | 0              | -2.963541               | -1.178606 | -0.692862 |
| 16               | 1                | 0              | -2.271690               | 2.316800  | -0.153109 |
| 17               | 1                | 0              | -3.492199               | 1.099793  | -0.474748 |
| 18               | 6                | 0              | -2.491012               | 0.845413  | 1.410782  |
| 19               | 6                | 0              | 0.555446                | 5.288473  | -0.787379 |
| 20               | 1                | 0              | 0.627171                | 4.758379  | 1.302414  |
| 21               | 1                | 0              | 0.438084                | 5.504638  | -2.931358 |
| 22               | 6                | 0              | -3.409942               | -2.597061 | -0.615763 |
| 23               | 6                | 0              | -3.642668               | 1.082583  | 2.172569  |
| 24               | 6                | 0              | -1.370849               | 0.268810  | 2.022852  |
| 25               | 1                | 0              | 0.832473                | 6.325247  | -0.616400 |
| 26               | 6                | 0              | -2.457153               | -3.381252 | 0.289207  |
| 27               | 6                | 0              | -3.517265               | -3.183130 | -2.025011 |
| 28               | 6                | 0              | -4.790227               | -2.457955 | 0.029417  |
| 29               | 6                | 0              | -3.677684               | 0.758971  | 3.528801  |
| 30               | 1                | 0              | -4.520066               | 1.521979  | 1.701287  |
| 31               | 6                | 0              | -1.413832               | -0.060163 | 3.381508  |
| 32               | 1                | 0              | -0.461737               | 0.073620  | 1.450887  |
| 33               | 1                | 0              | -2.867145               | -4.382982 | 0.458595  |
| 34               | 1                | 0              | -1.467066               | -3.482898 | -0.158503 |
| 35               | 1                | 0              | -2.356597               | -2.882304 | 1.258346  |
| 36               | 1                | 0              | -2.536890               | -3.281526 | -2.492854 |
| 37               | 1                | 0              | -3.979984               | -4.174670 | -1.967344 |

|    |   |   |           |           |           |
|----|---|---|-----------|-----------|-----------|
| 38 | 1 | 0 | -4.150561 | -2.550498 | -2.656288 |
| 39 | 1 | 0 | -5.237625 | -3.448056 | 0.163382  |
| 40 | 1 | 0 | -4.712387 | -1.973971 | 1.007608  |
| 41 | 1 | 0 | -5.456170 | -1.861439 | -0.602798 |
| 42 | 6 | 0 | -2.560301 | 0.183310  | 4.138235  |
| 43 | 1 | 0 | -4.578750 | 0.949316  | 4.106208  |
| 44 | 1 | 0 | -0.539275 | -0.509863 | 3.844535  |
| 45 | 1 | 0 | -2.586466 | -0.075299 | 5.193535  |
| 46 | 3 | 0 | 0.861185  | -1.171083 | -2.156416 |
| 47 | 1 | 0 | 1.944136  | -3.067971 | -3.521590 |
| 48 | 6 | 0 | 2.508431  | -0.760726 | 0.075101  |
| 49 | 6 | 0 | 3.915324  | -0.921602 | 0.614163  |
| 50 | 6 | 0 | 4.548623  | -2.169581 | 0.532153  |
| 51 | 6 | 0 | 4.616915  | 0.146266  | 1.191560  |
| 52 | 6 | 0 | 5.833925  | -2.353773 | 1.040278  |
| 53 | 1 | 0 | 4.011450  | -2.991118 | 0.069427  |
| 54 | 6 | 0 | 5.909405  | -0.029823 | 1.686014  |
| 55 | 1 | 0 | 4.155648  | 1.129979  | 1.231108  |
| 56 | 6 | 0 | 6.520359  | -1.283530 | 1.618635  |
| 57 | 1 | 0 | 6.303992  | -3.332680 | 0.981409  |
| 58 | 1 | 0 | 6.442090  | 0.813755  | 2.118362  |
| 59 | 1 | 0 | 7.525969  | -1.423560 | 2.007264  |
| 60 | 7 | 0 | 1.669323  | 0.106404  | 0.575986  |
| 61 | 1 | 0 | 2.106522  | 0.590563  | 1.362060  |
| 62 | 8 | 0 | 2.191669  | -1.553171 | -0.898076 |
| 63 | 1 | 0 | 2.618079  | -2.057365 | -2.554615 |

-----  
Zero-point correction= 0.510034 (Hartree/Particle)  
Thermal correction to Energy= 0.543935  
Thermal correction to Enthalpy= 0.544879  
Thermal correction to Gibbs Free Energy= 0.440407  
Sum of electronic and zero-point Energies= -1501.027340  
Sum of electronic and thermal Energies= -1500.993439  
Sum of electronic and thermal Enthalpies= -1500.992495  
Sum of electronic and thermal Free Energies= -1501.096967  
M06-2X /6-311++G (d, p)/SMD// B3LYP /6-31G(d) energy=-1501.359387

### INT5a

-----

| Center<br>Number | Atomic<br>Number | Atomic<br>Type | Coordinates (Angstroms) |           |           |
|------------------|------------------|----------------|-------------------------|-----------|-----------|
|                  |                  |                | X                       | Y         | Z         |
| 1                | 8                | 0              | 1.814770                | -3.868904 | -2.510080 |
| 2                | 8                | 0              | 0.600659                | -0.376056 | -2.430439 |
| 3                | 6                | 0              | 0.361893                | 0.304758  | -1.363047 |
| 4                | 6                | 0              | 0.404753                | 1.847312  | -1.563158 |
| 5                | 7                | 0              | -1.020090               | -0.089749 | -0.692060 |
| 6                | 6                | 0              | 0.289574                | 2.782368  | -0.523216 |
| 7                | 6                | 0              | 0.649754                | 2.310537  | -2.858592 |
| 8                | 6                | 0              | -1.219975               | -1.416355 | -0.475354 |
| 9                | 6                | 0              | -2.183352               | 0.802634  | -0.741112 |
| 10               | 6                | 0              | 0.418637                | 4.148848  | -0.776367 |
| 11               | 1                | 0              | 0.058918                | 2.460553  | 0.489917  |
| 12               | 6                | 0              | 0.776478                | 3.677084  | -3.114058 |
| 13               | 1                | 0              | 0.748063                | 1.572913  | -3.647236 |
| 14               | 8                | 0              | -0.368904               | -2.304774 | -0.635821 |
| 15               | 8                | 0              | -2.472869               | -1.676718 | -0.034282 |
| 16               | 1                | 0              | -1.961925               | 1.591169  | -1.463117 |
| 17               | 1                | 0              | -3.036810               | 0.246187  | -1.139672 |
| 18               | 6                | 0              | -2.592767               | 1.436703  | 0.582644  |
| 19               | 6                | 0              | 0.664878                | 4.601214  | -2.074290 |
| 20               | 1                | 0              | 0.319700                | 4.858620  | 0.041000  |
| 21               | 1                | 0              | 0.968202                | 4.019340  | -4.128030 |
| 22               | 6                | 0              | -2.945868               | -3.040306 | 0.250316  |
| 23               | 6                | 0              | -3.538300               | 2.471168  | 0.567820  |
| 24               | 6                | 0              | -2.083956               | 1.015033  | 1.814597  |
| 25               | 1                | 0              | 0.766924                | 5.665214  | -2.271826 |

|    |   |   |           |           |           |
|----|---|---|-----------|-----------|-----------|
| 26 | 6 | 0 | -2.134678 | -3.653889 | 1.396701  |
| 27 | 6 | 0 | -2.905467 | -3.894771 | -1.021220 |
| 28 | 6 | 0 | -4.393404 | -2.796380 | 0.687917  |
| 29 | 6 | 0 | -3.967400 | 3.067053  | 1.752844  |
| 30 | 1 | 0 | -3.939863 | 2.815048  | -0.383674 |
| 31 | 6 | 0 | -2.507686 | 1.613401  | 3.004319  |
| 32 | 1 | 0 | -1.349181 | 0.216197  | 1.840487  |
| 33 | 1 | 0 | -2.574090 | -4.616248 | 1.683004  |
| 34 | 1 | 0 | -1.095738 | -3.812987 | 1.104961  |
| 35 | 1 | 0 | -2.159133 | -2.996115 | 2.272304  |
| 36 | 1 | 0 | -1.879749 | -4.070556 | -1.348077 |
| 37 | 1 | 0 | -3.385733 | -4.861030 | -0.829553 |
| 38 | 1 | 0 | -3.452156 | -3.398607 | -1.830461 |
| 39 | 1 | 0 | -4.870656 | -3.744963 | 0.955861  |
| 40 | 1 | 0 | -4.425341 | -2.130878 | 1.556137  |
| 41 | 1 | 0 | -4.969729 | -2.334690 | -0.120379 |
| 42 | 6 | 0 | -3.452022 | 2.639572  | 2.979035  |
| 43 | 1 | 0 | -4.700097 | 3.869432  | 1.719104  |
| 44 | 1 | 0 | -2.098723 | 1.272954  | 3.952516  |
| 45 | 1 | 0 | -3.782436 | 3.104368  | 3.904183  |
| 46 | 3 | 0 | 1.002573  | -2.110287 | -1.998520 |
| 47 | 1 | 0 | 1.382182  | -4.540243 | -1.958896 |
| 48 | 6 | 0 | 2.442526  | -0.767497 | -0.183905 |
| 49 | 6 | 0 | 3.492355  | -0.462766 | 0.850457  |
| 50 | 6 | 0 | 4.206264  | -1.531242 | 1.408533  |
| 51 | 6 | 0 | 3.800819  | 0.846893  | 1.245229  |
| 52 | 6 | 0 | 5.191282  | -1.298305 | 2.365495  |
| 53 | 1 | 0 | 3.975930  | -2.539609 | 1.080644  |
| 54 | 6 | 0 | 4.796465  | 1.080115  | 2.194100  |
| 55 | 1 | 0 | 3.291694  | 1.690300  | 0.785413  |
| 56 | 6 | 0 | 5.487924  | 0.008459  | 2.761461  |
| 57 | 1 | 0 | 5.731149  | -2.134901 | 2.800894  |
| 58 | 1 | 0 | 5.037639  | 2.099514  | 2.482687  |
| 59 | 1 | 0 | 6.260735  | 0.190984  | 3.503360  |
| 60 | 7 | 0 | 1.385145  | 0.064608  | -0.213205 |
| 61 | 1 | 0 | 1.388827  | 0.783879  | 0.496666  |
| 62 | 8 | 0 | 2.583996  | -1.767467 | -0.919572 |
| 63 | 1 | 0 | 2.574732  | -3.567494 | -1.977148 |

-----  
Zero-point correction= 0.510539 (Hartree/Particle)  
Thermal correction to Energy= 0.543756  
Thermal correction to Enthalpy= 0.544700  
Thermal correction to Gibbs Free Energy= 0.442746  
Sum of electronic and zero-point Energies= -1501.023052  
Sum of electronic and thermal Energies= -1500.989836  
Sum of electronic and thermal Enthalpies= -1500.988892  
Sum of electronic and thermal Free Energies= -1501.090845  
M06-2X /6-311++G (d, p)/SMD// B3LYP /6-31G(d) energy=-1501.362811

### INT6a

| Center<br>Number | Atomic<br>Number | Atomic<br>Type | Coordinates (Angstroms) |           |           |
|------------------|------------------|----------------|-------------------------|-----------|-----------|
|                  |                  |                | X                       | Y         | Z         |
| 1                | 8                | 0              | -2.657686               | -2.884919 | -2.696910 |
| 2                | 8                | 0              | -0.481427               | 0.053802  | -2.626661 |
| 3                | 6                | 0              | 0.406418                | 0.535539  | -1.927292 |
| 4                | 6                | 0              | 0.579439                | 2.010278  | -1.802357 |
| 5                | 7                | 0              | -1.104169               | 0.017637  | 0.615478  |
| 6                | 6                | 0              | 1.792535                | 2.619583  | -1.450287 |
| 7                | 6                | 0              | -0.533871               | 2.811762  | -2.097983 |
| 8                | 6                | 0              | -2.270381               | -0.517536 | 0.386387  |
| 9                | 6                | 0              | -1.011052               | 0.985181  | 1.697545  |
| 10               | 6                | 0              | 1.887204                | 4.008617  | -1.387097 |
| 11               | 1                | 0              | 2.677580                | 2.025174  | -1.244055 |
| 12               | 6                | 0              | -0.438412               | 4.197667  | -2.025603 |
| 13               | 1                | 0              | -1.464221               | 2.327801  | -2.373522 |

|    |   |   |           |           |           |
|----|---|---|-----------|-----------|-----------|
| 14 | 8 | 0 | -2.501091 | -1.363765 | -0.550051 |
| 15 | 8 | 0 | -3.309722 | -0.123101 | 1.209704  |
| 16 | 1 | 0 | -1.559569 | 1.914958  | 1.470155  |
| 17 | 1 | 0 | -1.472838 | 0.604087  | 2.624685  |
| 18 | 6 | 0 | 0.432178  | 1.344706  | 2.007142  |
| 19 | 6 | 0 | 0.772624  | 4.798944  | -1.670980 |
| 20 | 1 | 0 | 2.832031  | 4.471490  | -1.117945 |
| 21 | 1 | 0 | -1.307825 | 4.810742  | -2.245199 |
| 22 | 6 | 0 | -4.663436 | -0.641493 | 1.114303  |
| 23 | 6 | 0 | 0.809032  | 2.667787  | 2.266001  |
| 24 | 6 | 0 | 1.419775  | 0.350450  | 2.084288  |
| 25 | 1 | 0 | 0.847348  | 5.881729  | -1.617806 |
| 26 | 6 | 0 | -4.690305 | -2.154687 | 1.371102  |
| 27 | 6 | 0 | -5.297144 | -0.266184 | -0.232596 |
| 28 | 6 | 0 | -5.386557 | 0.091255  | 2.252339  |
| 29 | 6 | 0 | 2.128136  | 2.994629  | 2.590817  |
| 30 | 1 | 0 | 0.059281  | 3.453745  | 2.204750  |
| 31 | 6 | 0 | 2.741638  | 0.670626  | 2.403235  |
| 32 | 1 | 0 | 1.132031  | -0.679770 | 1.893835  |
| 33 | 1 | 0 | -5.725544 | -2.514402 | 1.406627  |
| 34 | 1 | 0 | -4.153423 | -2.693466 | 0.589450  |
| 35 | 1 | 0 | -4.217792 | -2.379805 | 2.333923  |
| 36 | 1 | 0 | -4.769591 | -0.741933 | -1.060081 |
| 37 | 1 | 0 | -6.349501 | -0.573837 | -0.255141 |
| 38 | 1 | 0 | -5.257094 | 0.819723  | -0.375135 |
| 39 | 1 | 0 | -6.439670 | -0.208500 | 2.295632  |
| 40 | 1 | 0 | -4.918257 | -0.139417 | 3.214913  |
| 41 | 1 | 0 | -5.338771 | 1.174565  | 2.100355  |
| 42 | 6 | 0 | 3.102083  | 1.997550  | 2.657534  |
| 43 | 1 | 0 | 2.394916  | 4.030604  | 2.786687  |
| 44 | 1 | 0 | 3.488216  | -0.117918 | 2.463112  |
| 45 | 1 | 0 | 4.129218  | 2.248773  | 2.910606  |
| 46 | 3 | 0 | -1.311043 | -1.583888 | -1.983535 |
| 47 | 1 | 0 | -3.085655 | -2.612720 | -1.856769 |
| 48 | 6 | 0 | 1.363747  | -1.638705 | -1.210074 |
| 49 | 6 | 0 | 2.537434  | -2.245747 | -0.517172 |
| 50 | 6 | 0 | 2.372287  | -3.515847 | 0.055343  |
| 51 | 6 | 0 | 3.789240  | -1.615520 | -0.452846 |
| 52 | 6 | 0 | 3.436987  | -4.134906 | 0.703661  |
| 53 | 1 | 0 | 1.402000  | -3.996334 | -0.010469 |
| 54 | 6 | 0 | 4.857531  | -2.245197 | 0.184582  |
| 55 | 1 | 0 | 3.942343  | -0.651087 | -0.928013 |
| 56 | 6 | 0 | 4.680768  | -3.500831 | 0.769436  |
| 57 | 1 | 0 | 3.299045  | -5.112136 | 1.157303  |
| 58 | 1 | 0 | 5.827973  | -1.758447 | 0.218729  |
| 59 | 1 | 0 | 5.512817  | -3.987314 | 1.271020  |
| 60 | 7 | 0 | 1.362995  | -0.250201 | -1.277557 |
| 61 | 1 | 0 | 1.876554  | 0.212820  | -0.534724 |
| 62 | 8 | 0 | 0.475590  | -2.342569 | -1.687506 |
| 63 | 1 | 0 | -2.352960 | -3.792597 | -2.542939 |

-----  
Zero-point correction= 0.508826 (Hartree/Particle)  
Thermal correction to Energy= 0.543184  
Thermal correction to Enthalpy= 0.544128  
Thermal correction to Gibbs Free Energy= 0.438364  
Sum of electronic and zero-point Energies= -1501.032726  
Sum of electronic and thermal Energies= -1500.998368  
Sum of electronic and thermal Enthalpies= -1500.997424  
Sum of electronic and thermal Free Energies= -1501.103188  
M06-2X /6-311++G (d, p)/SMD// B3LYP /6-31G(d) energy=-1501.364132

#### INT7a

-----

| Center<br>Number | Atomic<br>Number | Atomic<br>Type | Coordinates (Angstroms) |          |          |
|------------------|------------------|----------------|-------------------------|----------|----------|
|                  |                  |                | X                       | Y        | Z        |
| 1                | 8                | 0              | -0.532102               | 3.593988 | 0.149241 |

|    |   |   |           |           |           |
|----|---|---|-----------|-----------|-----------|
| 2  | 7 | 0 | 0.090767  | 1.264562  | -0.963047 |
| 3  | 6 | 0 | 1.164099  | 0.872502  | -0.263780 |
| 4  | 6 | 0 | -0.839739 | 0.353808  | -1.619152 |
| 5  | 8 | 0 | 1.818829  | 1.653180  | 0.471787  |
| 6  | 8 | 0 | 1.489106  | -0.418448 | -0.436997 |
| 7  | 1 | 0 | -1.309800 | 0.921841  | -2.432227 |
| 8  | 1 | 0 | -0.282341 | -0.463962 | -2.081651 |
| 9  | 6 | 0 | -1.916635 | -0.200294 | -0.695409 |
| 10 | 6 | 0 | 2.643982  | -1.047509 | 0.227456  |
| 11 | 6 | 0 | -2.355676 | -1.520614 | -0.839785 |
| 12 | 6 | 0 | -2.510132 | 0.612381  | 0.281915  |
| 13 | 6 | 0 | 2.463865  | -1.008128 | 1.748361  |
| 14 | 6 | 0 | 3.943869  | -0.377995 | -0.229592 |
| 15 | 6 | 0 | 2.567403  | -2.488196 | -0.286225 |
| 16 | 6 | 0 | -3.373285 | -2.027232 | -0.028706 |
| 17 | 1 | 0 | -1.895779 | -2.159773 | -1.591100 |
| 18 | 6 | 0 | -3.524222 | 0.103414  | 1.094436  |
| 19 | 1 | 0 | -2.168954 | 1.638695  | 0.410046  |
| 20 | 1 | 0 | 3.255374  | -1.596724 | 2.225856  |
| 21 | 1 | 0 | 2.511312  | 0.014210  | 2.126033  |
| 22 | 1 | 0 | 1.498970  | -1.444754 | 2.027562  |
| 23 | 1 | 0 | 4.000736  | 0.653974  | 0.119668  |
| 24 | 1 | 0 | 4.801292  | -0.932914 | 0.167714  |
| 25 | 1 | 0 | 4.011514  | -0.386128 | -1.322978 |
| 26 | 1 | 0 | 3.381777  | -3.083041 | 0.140273  |
| 27 | 1 | 0 | 1.615162  | -2.947776 | -0.003049 |
| 28 | 1 | 0 | 2.653348  | -2.514614 | -1.377366 |
| 29 | 6 | 0 | -3.960565 | -1.214994 | 0.941928  |
| 30 | 1 | 0 | -3.700579 | -3.056732 | -0.151200 |
| 31 | 1 | 0 | -3.976217 | 0.741173  | 1.850080  |
| 32 | 1 | 0 | -4.750314 | -1.607043 | 1.577687  |
| 33 | 3 | 0 | 0.994548  | 3.281383  | 0.847215  |
| 34 | 1 | 0 | -0.255022 | 2.238241  | -0.703438 |
| 35 | 1 | 0 | -1.033946 | 4.316622  | -0.243158 |

-----

Zero-point correction= 0.289111 (Hartree/Particle)  
Thermal correction to Energy= 0.307673  
Thermal correction to Enthalpy= 0.308617  
Thermal correction to Gibbs Free Energy= 0.241600  
Sum of electronic and zero-point Energies= -755.890060  
Sum of electronic and thermal Energies= -755.871498  
Sum of electronic and thermal Enthalpies= -755.870553  
Sum of electronic and thermal Free Energies= -755.937571  
M06-2X /6-311++G (d, p)/SMD// B3LYP /6-31G(d) energy=-756.085059

### TS1a

-----

| Center<br>Number | Atomic<br>Number | Atomic<br>Type | Coordinates (Angstroms) |           |           |
|------------------|------------------|----------------|-------------------------|-----------|-----------|
|                  |                  |                | X                       | Y         | Z         |
| 1                | 8                | 0              | 1.043097                | 0.550179  | -1.380812 |
| 2                | 8                | 0              | 0.122153                | 0.629392  | 1.053311  |
| 3                | 6                | 0              | -0.461234               | 1.014650  | 0.031156  |
| 4                | 6                | 0              | -0.517080               | 2.477806  | -0.313111 |
| 5                | 7                | 0              | -1.532855               | 0.182926  | -0.533278 |
| 6                | 6                | 0              | -0.355900               | 3.389890  | 0.735035  |
| 7                | 6                | 0              | -0.701603               | 2.957253  | -1.617723 |
| 8                | 6                | 0              | -1.365116               | -1.189010 | -0.549666 |
| 9                | 6                | 0              | -2.891520               | 0.735477  | -0.701487 |
| 10               | 6                | 0              | -0.392917               | 4.763598  | 0.487457  |
| 11               | 1                | 0              | -0.194803               | 3.008808  | 1.738017  |
| 12               | 6                | 0              | -0.738680               | 4.326547  | -1.863811 |
| 13               | 1                | 0              | -0.782689               | 2.249357  | -2.435388 |
| 14               | 8                | 0              | -0.314191               | -1.775566 | -0.296597 |
| 15               | 8                | 0              | -2.496052               | -1.804493 | -0.924364 |
| 16               | 1                | 0              | -2.778771               | 1.813234  | -0.828220 |
| 17               | 1                | 0              | -3.316864               | 0.347938  | -1.630361 |

|    |   |   |           |           |           |
|----|---|---|-----------|-----------|-----------|
| 18 | 6 | 0 | -3.842562 | 0.460026  | 0.454371  |
| 19 | 6 | 0 | -0.587390 | 5.234874  | -0.810345 |
| 20 | 1 | 0 | -0.268399 | 5.463203  | 1.309719  |
| 21 | 1 | 0 | -0.873280 | 4.688810  | -2.879679 |
| 22 | 6 | 0 | -2.620052 | -3.278654 | -0.946835 |
| 23 | 6 | 0 | -5.217310 | 0.381851  | 0.200447  |
| 24 | 6 | 0 | -3.390282 | 0.333148  | 1.773335  |
| 25 | 1 | 0 | -0.614642 | 6.303819  | -1.005314 |
| 26 | 6 | 0 | -2.384849 | -3.841323 | 0.457755  |
| 27 | 6 | 0 | -1.666308 | -3.871413 | -1.988195 |
| 28 | 6 | 0 | -4.078536 | -3.468831 | -1.371695 |
| 29 | 6 | 0 | -6.126138 | 0.186346  | 1.240803  |
| 30 | 1 | 0 | -5.579654 | 0.471453  | -0.821846 |
| 31 | 6 | 0 | -4.299286 | 0.130897  | 2.814221  |
| 32 | 1 | 0 | -2.326361 | 0.381299  | 1.988084  |
| 33 | 1 | 0 | -2.611793 | -4.913349 | 0.460942  |
| 34 | 1 | 0 | -1.349716 | -3.702902 | 0.773449  |
| 35 | 1 | 0 | -3.045643 | -3.349715 | 1.179416  |
| 36 | 1 | 0 | -0.624068 | -3.741027 | -1.693916 |
| 37 | 1 | 0 | -1.869370 | -4.942713 | -2.097807 |
| 38 | 1 | 0 | -1.823400 | -3.396374 | -2.962953 |
| 39 | 1 | 0 | -4.320127 | -4.535994 | -1.411792 |
| 40 | 1 | 0 | -4.752919 | -2.982843 | -0.659920 |
| 41 | 1 | 0 | -4.252425 | -3.038086 | -2.363368 |
| 42 | 6 | 0 | -5.668532 | 0.058953  | 2.553671  |
| 43 | 1 | 0 | -7.189773 | 0.126099  | 1.024561  |
| 44 | 1 | 0 | -3.932660 | 0.030501  | 3.832555  |
| 45 | 1 | 0 | -6.373237 | -0.098399 | 3.365899  |
| 46 | 3 | 0 | 1.271566  | -0.686856 | 0.048329  |
| 47 | 1 | 0 | 0.715655  | 0.104764  | -2.178223 |
| 48 | 6 | 0 | 4.011847  | -0.367205 | -0.169487 |
| 49 | 6 | 0 | 5.443707  | -0.540550 | 0.243676  |
| 50 | 6 | 0 | 5.706717  | -1.094468 | 1.503413  |
| 51 | 6 | 0 | 6.516338  | -0.183639 | -0.585678 |
| 52 | 6 | 0 | 7.019730  | -1.265308 | 1.936654  |
| 53 | 1 | 0 | 4.867738  | -1.382466 | 2.127961  |
| 54 | 6 | 0 | 7.830376  | -0.364274 | -0.155375 |
| 55 | 1 | 0 | 6.330039  | 0.203678  | -1.583893 |
| 56 | 6 | 0 | 8.084189  | -0.899253 | 1.109120  |
| 57 | 1 | 0 | 7.214077  | -1.686616 | 2.919254  |
| 58 | 1 | 0 | 8.654903  | -0.094621 | -0.809726 |
| 59 | 1 | 0 | 9.108406  | -1.037041 | 1.445451  |
| 60 | 7 | 0 | 3.726890  | 0.550323  | -1.107729 |
| 61 | 1 | 0 | 4.422519  | 1.229319  | -1.377902 |
| 62 | 8 | 0 | 3.124694  | -1.076398 | 0.355746  |
| 63 | 1 | 0 | 2.711052  | 0.698448  | -1.347448 |

-----  
Zero-point correction= 0.509168 (Hartree/Particle)  
Thermal correction to Energy= 0.541894  
Thermal correction to Enthalpy= 0.542838  
Thermal correction to Gibbs Free Energy= 0.441024  
Sum of electronic and zero-point Energies= -1501.030063  
Sum of electronic and thermal Energies= -1500.997337  
Sum of electronic and thermal Enthalpies= -1500.996393  
Sum of electronic and thermal Free Energies= -1501.098207  
M06-2X /6-311++G (d, p)/SMD// B3LYP /6-31G(d) energy=-1501.352516

### TS2a

| Center Number | Atomic Number | Atomic Type | Coordinates (Angstroms) |           |           |
|---------------|---------------|-------------|-------------------------|-----------|-----------|
|               |               |             | X                       | Y         | Z         |
| 1             | 8             | 0           | 1.604756                | 0.669623  | -1.941485 |
| 2             | 8             | 0           | 0.303790                | 0.775909  | 0.752640  |
| 3             | 6             | 0           | -0.744412               | 1.015754  | 0.174095  |
| 4             | 6             | 0           | -1.152325               | 2.442323  | -0.073460 |
| 5             | 7             | 0           | -1.577388               | -0.011344 | -0.322912 |



|    |   |   |           |           |           |
|----|---|---|-----------|-----------|-----------|
| 6  | 6 | 0 | -2.164758 | 3.085376  | 0.648724  |
| 7  | 6 | 0 | -0.378585 | 3.154190  | -1.003192 |
| 8  | 6 | 0 | -1.108726 | -1.342244 | -0.355078 |
| 9  | 6 | 0 | -2.926946 | 0.279832  | -0.843293 |
| 10 | 6 | 0 | -2.408833 | 4.442771  | 0.434774  |
| 11 | 1 | 0 | -2.754533 | 2.536376  | 1.376971  |
| 12 | 6 | 0 | -0.644559 | 4.506289  | -1.218699 |
| 13 | 1 | 0 | 0.411676  | 2.630312  | -1.539397 |
| 14 | 8 | 0 | 0.062390  | -1.667368 | -0.255663 |
| 15 | 8 | 0 | -2.126437 | -2.183080 | -0.534941 |
| 16 | 1 | 0 | -2.898212 | 1.294432  | -1.244913 |
| 17 | 1 | 0 | -3.107106 | -0.391862 | -1.684757 |
| 18 | 6 | 0 | -4.060521 | 0.156115  | 0.163955  |
| 19 | 6 | 0 | -1.653888 | 5.152333  | -0.500889 |
| 20 | 1 | 0 | -3.188346 | 4.943942  | 1.002051  |
| 21 | 1 | 0 | -0.052447 | 5.058880  | -1.943205 |
| 22 | 6 | 0 | -1.919644 | -3.653543 | -0.660976 |
| 23 | 6 | 0 | -5.363324 | 0.433884  | -0.271834 |
| 24 | 6 | 0 | -3.861078 | -0.212812 | 1.497048  |
| 25 | 1 | 0 | -1.849046 | 6.208587  | -0.666477 |
| 26 | 6 | 0 | -1.325022 | -4.198631 | 0.639397  |
| 27 | 6 | 0 | -1.048844 | -3.952679 | -1.883408 |
| 28 | 6 | 0 | -3.349365 | -4.156745 | -0.866008 |
| 29 | 6 | 0 | -6.442523 | 0.345820  | 0.605392  |
| 30 | 1 | 0 | -5.533570 | 0.723693  | -1.307072 |
| 31 | 6 | 0 | -4.941976 | -0.299071 | 2.379134  |
| 32 | 1 | 0 | -2.860181 | -0.436801 | 1.854029  |
| 33 | 1 | 0 | -1.295281 | -5.292562 | 0.589097  |
| 34 | 1 | 0 | -0.310895 | -3.830619 | 0.802319  |
| 35 | 1 | 0 | -1.949835 | -3.915921 | 1.493321  |
| 36 | 1 | 0 | -0.025810 | -3.599466 | -1.745935 |
| 37 | 1 | 0 | -1.023547 | -5.035413 | -2.048328 |
| 38 | 1 | 0 | -1.471989 | -3.485426 | -2.779410 |
| 39 | 1 | 0 | -3.348444 | -5.247874 | -0.954094 |
| 40 | 1 | 0 | -3.983737 | -3.875421 | -0.019972 |
| 41 | 1 | 0 | -3.783555 | -3.737084 | -1.779204 |
| 42 | 6 | 0 | -6.234761 | -0.021098 | 1.937550  |
| 43 | 1 | 0 | -7.445651 | 0.565822  | 0.249908  |
| 44 | 1 | 0 | -4.768078 | -0.586143 | 3.412739  |
| 45 | 1 | 0 | -7.074506 | -0.088712 | 2.623618  |
| 46 | 3 | 0 | 1.581637  | -0.368130 | -0.333759 |
| 47 | 1 | 0 | 1.564789  | 0.159148  | -2.765037 |
| 48 | 6 | 0 | 4.263130  | -0.013269 | -0.332625 |
| 49 | 6 | 0 | 5.654498  | -0.111455 | 0.242880  |
| 50 | 6 | 0 | 5.802197  | -0.531721 | 1.571174  |
| 51 | 6 | 0 | 6.801734  | 0.188079  | -0.504248 |
| 52 | 6 | 0 | 7.067212  | -0.624014 | 2.148793  |
| 53 | 1 | 0 | 4.908304  | -0.781665 | 2.132885  |
| 54 | 6 | 0 | 8.069608  | 0.084086  | 0.068228  |
| 55 | 1 | 0 | 6.707569  | 0.477111  | -1.547889 |
| 56 | 6 | 0 | 8.205087  | -0.315800 | 1.399100  |
| 57 | 1 | 0 | 7.167395  | -0.940501 | 3.184050  |
| 58 | 1 | 0 | 8.951360  | 0.309585  | -0.526293 |
| 59 | 1 | 0 | 9.192497  | -0.393324 | 1.847241  |
| 60 | 7 | 0 | 4.018189  | 0.800185  | -1.351425 |
| 61 | 1 | 0 | 4.777291  | 1.407338  | -1.635949 |
| 62 | 8 | 0 | 3.356043  | -0.726004 | 0.193500  |
| 63 | 1 | 0 | 2.808750  | 0.830829  | -1.750262 |

-----  
Zero-point correction= 0.505173 (Hartree/Particle)  
Thermal correction to Energy= 0.538515  
Thermal correction to Enthalpy= 0.539459  
Thermal correction to Gibbs Free Energy= 0.434769  
Sum of electronic and zero-point Energies= -1501.038464  
Sum of electronic and thermal Energies= -1501.005123  
Sum of electronic and thermal Enthalpies= -1501.004179  
Sum of electronic and thermal Free Energies= -1501.108868

## TS3a

| Center<br>Number | Atomic<br>Number | Atomic<br>Type | Coordinates (Angstroms) |           |           |
|------------------|------------------|----------------|-------------------------|-----------|-----------|
|                  |                  |                | X                       | Y         | Z         |
| 1                | 8                | 0              | 1.444397                | -4.085024 | -2.236226 |
| 2                | 8                | 0              | 0.499981                | -0.622094 | -2.365377 |
| 3                | 6                | 0              | 0.190809                | 0.238538  | -1.511961 |
| 4                | 6                | 0              | 0.733245                | 1.651395  | -1.716656 |
| 5                | 7                | 0              | -1.174254               | 0.147708  | -0.937264 |
| 6                | 6                | 0              | 0.750471                | 2.663440  | -0.742731 |
| 7                | 6                | 0              | 1.299467                | 1.917200  | -2.969565 |
| 8                | 6                | 0              | -1.701505               | -1.099260 | -0.694033 |
| 9                | 6                | 0              | -2.047388               | 1.318217  | -0.761470 |
| 10               | 6                | 0              | 1.317120                | 3.906854  | -1.020656 |
| 11               | 1                | 0              | 0.312892                | 2.492132  | 0.236297  |
| 12               | 6                | 0              | 1.863060                | 3.162925  | -3.248132 |
| 13               | 1                | 0              | 1.299062                | 1.126831  | -3.711456 |
| 14               | 8                | 0              | -1.094701               | -2.167869 | -0.783584 |
| 15               | 8                | 0              | -2.992175               | -1.014823 | -0.326591 |
| 16               | 1                | 0              | -1.594904               | 2.144794  | -1.310304 |
| 17               | 1                | 0              | -3.003337               | 1.109339  | -1.248990 |
| 18               | 6                | 0              | -2.306992               | 1.738104  | 0.679409  |
| 19               | 6                | 0              | 1.875715                | 4.162321  | -2.275334 |
| 20               | 1                | 0              | 1.321120                | 4.676652  | -0.253408 |
| 21               | 1                | 0              | 2.296416                | 3.349126  | -4.227327 |
| 22               | 6                | 0              | -3.775416               | -2.196238 | 0.086525  |
| 23               | 6                | 0              | -3.288139               | 2.707786  | 0.926280  |
| 24               | 6                | 0              | -1.597150               | 1.207425  | 1.762045  |
| 25               | 1                | 0              | 2.317642                | 5.131808  | -2.489638 |
| 26               | 6                | 0              | -3.143167               | -2.832860 | 1.327966  |
| 27               | 6                | 0              | -3.908730               | -3.178378 | -1.081374 |
| 28               | 6                | 0              | -5.133045               | -1.576361 | 0.429542  |
| 29               | 6                | 0              | -3.552883               | 3.142195  | 2.224331  |
| 30               | 1                | 0              | -3.851982               | 3.124967  | 0.093774  |
| 31               | 6                | 0              | -1.863154               | 1.641448  | 3.064142  |
| 32               | 1                | 0              | -0.833060               | 0.455049  | 1.584555  |
| 33               | 1                | 0              | -3.801719               | -3.622112 | 1.707691  |
| 34               | 1                | 0              | -2.169180               | -3.268609 | 1.100320  |
| 35               | 1                | 0              | -3.019955               | -2.082446 | 2.116008  |
| 36               | 1                | 0              | -2.947351               | -3.624673 | -1.338398 |
| 37               | 1                | 0              | -4.606733               | -3.977303 | -0.806584 |
| 38               | 1                | 0              | -4.308667               | -2.667923 | -1.964272 |
| 39               | 1                | 0              | -5.823145               | -2.354033 | 0.773025  |
| 40               | 1                | 0              | -5.026305               | -0.828500 | 1.221191  |
| 41               | 1                | 0              | -5.569714               | -1.090219 | -0.449001 |
| 42               | 6                | 0              | -2.839628               | 2.608731  | 3.300783  |
| 43               | 1                | 0              | -4.318266               | 3.894762  | 2.396047  |
| 44               | 1                | 0              | -1.302799               | 1.218536  | 3.894168  |
| 45               | 1                | 0              | -3.045654               | 2.944242  | 4.313691  |
| 46               | 3                | 0              | 0.589006                | -2.359329 | -1.660791 |
| 47               | 1                | 0              | 1.041458                | -4.863677 | -1.822091 |
| 48               | 6                | 0              | 2.179354                | -1.126021 | 0.171768  |
| 49               | 6                | 0              | 3.433644                | -0.931091 | 0.989918  |
| 50               | 6                | 0              | 4.035266                | -2.051171 | 1.579278  |
| 51               | 6                | 0              | 4.028871                | 0.326447  | 1.162270  |
| 52               | 6                | 0              | 5.190756                | -1.915110 | 2.346186  |
| 53               | 1                | 0              | 3.580435                | -3.024369 | 1.426069  |
| 54               | 6                | 0              | 5.194292                | 0.461811  | 1.916978  |
| 55               | 1                | 0              | 3.599842                | 1.201300  | 0.679992  |
| 56               | 6                | 0              | 5.774164                | -0.657252 | 2.517299  |
| 57               | 1                | 0              | 5.640072                | -2.790640 | 2.807998  |
| 58               | 1                | 0              | 5.652781                | 1.440722  | 2.030455  |
| 59               | 1                | 0              | 6.679309                | -0.550904 | 3.109575  |
| 60               | 7                | 0              | 1.273801                | -0.157525 | 0.120175  |

|    |   |   |          |           |           |
|----|---|---|----------|-----------|-----------|
| 61 | 1 | 0 | 1.563021 | 0.676082  | 0.622769  |
| 62 | 8 | 0 | 2.028027 | -2.242898 | -0.410114 |
| 63 | 1 | 0 | 2.116435 | -3.779139 | -1.591869 |

-----  
Zero-point correction= 0.509761 (Hartree/Particle)  
Thermal correction to Energy= 0.542577  
Thermal correction to Enthalpy= 0.543521  
Thermal correction to Gibbs Free Energy= 0.442887  
Sum of electronic and zero-point Energies= -1501.017385  
Sum of electronic and thermal Energies= -1500.984568  
Sum of electronic and thermal Enthalpies= -1500.983624  
Sum of electronic and thermal Free Energies= -1501.084258  
M06-2X /6-311++G (d, p)/SMD// B3LYP /6-31G(d) energy=-1501.352099

**TS4a**

-----

| Center<br>Number | Atomic<br>Number | Atomic<br>Type | Coordinates (Angstroms) |           |           |
|------------------|------------------|----------------|-------------------------|-----------|-----------|
|                  |                  |                | X                       | Y         | Z         |
| 1                | 8                | 0              | -2.319302               | -3.066813 | -2.895950 |
| 2                | 8                | 0              | -0.455692               | 0.148267  | -2.660147 |
| 3                | 6                | 0              | 0.130273                | 0.585705  | -1.635966 |
| 4                | 6                | 0              | 0.632122                | 2.029222  | -1.718235 |
| 5                | 7                | 0              | -1.108860               | 0.710288  | -0.211007 |
| 6                | 6                | 0              | 1.759048                | 2.530060  | -1.057072 |
| 7                | 6                | 0              | -0.085154               | 2.885737  | -2.565289 |
| 8                | 6                | 0              | -2.036537               | -0.240584 | -0.122746 |
| 9                | 6                | 0              | -1.102003               | 1.840069  | 0.708331  |
| 10               | 6                | 0              | 2.157156                | 3.858193  | -1.233260 |
| 11               | 1                | 0              | 2.350884                | 1.903700  | -0.397532 |
| 12               | 6                | 0              | 0.304979                | 4.211591  | -2.735478 |
| 13               | 1                | 0              | -0.943132               | 2.483792  | -3.092722 |
| 14               | 8                | 0              | -2.084415               | -1.269671 | -0.842696 |
| 15               | 8                | 0              | -2.962491               | -0.033283 | 0.863389  |
| 16               | 1                | 0              | -0.878769               | 2.748596  | 0.140639  |
| 17               | 1                | 0              | -2.102987               | 1.974676  | 1.130680  |
| 18               | 6                | 0              | -0.097144               | 1.721959  | 1.850029  |
| 19               | 6                | 0              | 1.430531                | 4.704220  | -2.069186 |
| 20               | 1                | 0              | 3.038920                | 4.225789  | -0.715057 |
| 21               | 1                | 0              | -0.264573               | 4.860432  | -3.395861 |
| 22               | 6                | 0              | -4.126397               | -0.895717 | 1.067945  |
| 23               | 6                | 0              | 0.482666                | 2.878012  | 2.390458  |
| 24               | 6                | 0              | 0.246145                | 0.483209  | 2.406689  |
| 25               | 1                | 0              | 1.740578                | 5.736907  | -2.205789 |
| 26               | 6                | 0              | -3.690742               | -2.308450 | 1.477490  |
| 27               | 6                | 0              | -5.024242               | -0.890862 | -0.175098 |
| 28               | 6                | 0              | -4.842091               | -0.209990 | 2.237942  |
| 29               | 6                | 0              | 1.373090                | 2.801856  | 3.461801  |
| 30               | 1                | 0              | 0.237195                | 3.846977  | 1.960900  |
| 31               | 6                | 0              | 1.143356                | 0.401929  | 3.474701  |
| 32               | 1                | 0              | -0.194940               | -0.422657 | 2.001110  |
| 33               | 1                | 0              | -4.569066               | -2.900433 | 1.759419  |
| 34               | 1                | 0              | -3.168083               | -2.815484 | 0.665811  |
| 35               | 1                | 0              | -3.022161               | -2.259391 | 2.343990  |
| 36               | 1                | 0              | -4.519546               | -1.335682 | -1.033796 |
| 37               | 1                | 0              | -5.942143               | -1.454991 | 0.025672  |
| 38               | 1                | 0              | -5.305668               | 0.135607  | -0.433928 |
| 39               | 1                | 0              | -5.749814               | -0.762177 | 2.504213  |
| 40               | 1                | 0              | -4.189719               | -0.168048 | 3.116094  |
| 41               | 1                | 0              | -5.124413               | 0.813368  | 1.970307  |
| 42               | 6                | 0              | 1.709068                | 1.560987  | 4.007841  |
| 43               | 1                | 0              | 1.811851                | 3.711384  | 3.864773  |
| 44               | 1                | 0              | 1.397693                | -0.569647 | 3.891152  |
| 45               | 1                | 0              | 2.407143                | 1.498635  | 4.838557  |
| 46               | 3                | 0              | -1.070035               | -1.577709 | -2.463512 |
| 47               | 1                | 0              | -2.717147               | -2.839282 | -2.033944 |
| 48               | 6                | 0              | 1.318737                | -1.625348 | -1.207771 |

|    |   |   |           |           |           |
|----|---|---|-----------|-----------|-----------|
| 49 | 6 | 0 | 2.472184  | -2.232657 | -0.460113 |
| 50 | 6 | 0 | 2.420995  | -3.604017 | -0.175222 |
| 51 | 6 | 0 | 3.596994  | -1.492878 | -0.067518 |
| 52 | 6 | 0 | 3.462549  | -4.219702 | 0.514299  |
| 53 | 1 | 0 | 1.556240  | -4.171063 | -0.503009 |
| 54 | 6 | 0 | 4.643806  | -2.112641 | 0.614449  |
| 55 | 1 | 0 | 3.676644  | -0.440919 | -0.326648 |
| 56 | 6 | 0 | 4.575571  | -3.474657 | 0.912488  |
| 57 | 1 | 0 | 3.409107  | -5.281381 | 0.739323  |
| 58 | 1 | 0 | 5.516111  | -1.533384 | 0.904024  |
| 59 | 1 | 0 | 5.390837  | -3.956103 | 1.445815  |
| 60 | 7 | 0 | 1.113477  | -0.300113 | -0.984871 |
| 61 | 1 | 0 | 1.544439  | 0.070161  | -0.148447 |
| 62 | 8 | 0 | 0.629294  | -2.338690 | -1.956485 |
| 63 | 1 | 0 | -1.796602 | -3.867449 | -2.727995 |

-----  
Zero-point correction= 0.509134 (Hartree/Particle)  
Thermal correction to Energy= 0.542356  
Thermal correction to Enthalpy= 0.543300  
Thermal correction to Gibbs Free Energy= 0.439608  
Sum of electronic and zero-point Energies= -1501.020739  
Sum of electronic and thermal Energies= -1500.987516  
Sum of electronic and thermal Enthalpies= -1500.986572  
Sum of electronic and thermal Free Energies= -1501.090264  
M06-2X /6-311++G (d, p)/SMD// B3LYP /6-31G(d) energy=-1501.355762

#### Li<sup>+</sup>\_1a2a

-----

| Center<br>Number | Atomic<br>Number | Atomic<br>Type | Coordinates (Angstroms) |           |           |
|------------------|------------------|----------------|-------------------------|-----------|-----------|
|                  |                  |                | X                       | Y         | Z         |
| 1                | 6                | 0              | -3.910268               | -0.206138 | 0.196709  |
| 2                | 6                | 0              | -5.373981               | -0.011307 | 0.359118  |
| 3                | 6                | 0              | -5.823810               | 1.226111  | 0.843726  |
| 4                | 6                | 0              | -6.308366               | -1.009698 | 0.038300  |
| 5                | 6                | 0              | -7.185111               | 1.452726  | 1.026775  |
| 6                | 1                | 0              | -5.096122               | 1.995239  | 1.078550  |
| 7                | 6                | 0              | -7.669855               | -0.775737 | 0.214008  |
| 8                | 1                | 0              | -5.987431               | -1.956247 | -0.388402 |
| 9                | 6                | 0              | -8.109026               | 0.452576  | 0.714324  |
| 10               | 1                | 0              | -7.526607               | 2.409084  | 1.411189  |
| 11               | 1                | 0              | -8.387933               | -1.547181 | -0.046904 |
| 12               | 1                | 0              | -9.171211               | 0.631758  | 0.853237  |
| 13               | 7                | 0              | -3.430255               | -1.465495 | 0.141244  |
| 14               | 1                | 0              | -4.010531               | -2.264964 | 0.345171  |
| 15               | 8                | 0              | -3.135216               | 0.774227  | 0.112988  |
| 16               | 1                | 0              | -2.429707               | -1.604195 | 0.048265  |
| 17               | 8                | 0              | -0.327362               | -0.644605 | -0.070232 |
| 18               | 6                | 0              | 0.805375                | -0.841830 | -0.529403 |
| 19               | 6                | 0              | 1.173256                | -2.209084 | -0.982190 |
| 20               | 7                | 0              | 1.752834                | 0.185019  | -0.660265 |
| 21               | 6                | 0              | 0.788997                | -3.301782 | -0.189435 |
| 22               | 6                | 0              | 1.775611                | -2.429940 | -2.231989 |
| 23               | 6                | 0              | 1.338776                | 1.530798  | -0.721075 |
| 24               | 6                | 0              | 3.214623                | -0.142897 | -0.478043 |
| 25               | 6                | 0              | 1.038590                | -4.600148 | -0.626770 |
| 26               | 1                | 0              | 0.319350                | -3.124473 | 0.773143  |
| 27               | 6                | 0              | 1.995954                | -3.731866 | -2.676256 |
| 28               | 1                | 0              | 2.040767                | -1.588618 | -2.866407 |
| 29               | 8                | 0              | 0.158007                | 1.876900  | -0.779053 |
| 30               | 8                | 0              | 2.363312                | 2.355223  | -0.753677 |
| 31               | 1                | 0              | 3.442247                | -1.002051 | -1.103884 |
| 32               | 1                | 0              | 3.766714                | 0.708067  | -0.868649 |
| 33               | 6                | 0              | 3.573032                | -0.433497 | 0.964774  |
| 34               | 6                | 0              | 1.638619                | -4.816214 | -1.870374 |
| 35               | 1                | 0              | 0.762506                | -5.443507 | -0.001119 |
| 36               | 1                | 0              | 2.444101                | -3.900262 | -3.650660 |

|    |   |   |           |           |           |
|----|---|---|-----------|-----------|-----------|
| 37 | 6 | 0 | 2.218517  | 3.851151  | -0.938650 |
| 38 | 6 | 0 | 3.549929  | 0.578382  | 1.936288  |
| 39 | 6 | 0 | 3.951705  | -1.727591 | 1.342360  |
| 40 | 1 | 0 | 1.823699  | -5.829616 | -2.214048 |
| 41 | 6 | 0 | 1.442653  | 4.436268  | 0.240119  |
| 42 | 6 | 0 | 1.562029  | 4.123413  | -2.290812 |
| 43 | 6 | 0 | 3.677426  | 4.303487  | -0.925217 |
| 44 | 6 | 0 | 3.889118  | 0.296655  | 3.258634  |
| 45 | 1 | 0 | 3.280822  | 1.592790  | 1.654788  |
| 46 | 6 | 0 | 4.299248  | -2.008471 | 2.665344  |
| 47 | 1 | 0 | 3.984717  | -2.518799 | 0.597649  |
| 48 | 1 | 0 | 1.473753  | 5.528716  | 0.172689  |
| 49 | 1 | 0 | 0.396876  | 4.124923  | 0.236770  |
| 50 | 1 | 0 | 1.902463  | 4.148473  | 1.191335  |
| 51 | 1 | 0 | 0.522665  | 3.791399  | -2.315022 |
| 52 | 1 | 0 | 1.580871  | 5.201603  | -2.480276 |
| 53 | 1 | 0 | 2.116935  | 3.632679  | -3.097017 |
| 54 | 1 | 0 | 3.722998  | 5.388487  | -1.059468 |
| 55 | 1 | 0 | 4.158646  | 4.055504  | 0.025833  |
| 56 | 1 | 0 | 4.241428  | 3.834371  | -1.737122 |
| 57 | 6 | 0 | 4.264486  | -0.998191 | 3.626121  |
| 58 | 1 | 0 | 3.872405  | 1.089538  | 4.000983  |
| 59 | 1 | 0 | 4.599149  | -3.015108 | 2.942042  |
| 60 | 1 | 0 | 4.535548  | -1.214747 | 4.655326  |
| 61 | 3 | 0 | -1.337417 | 0.967819  | -0.134459 |

-----  
Zero-point correction= 0.497994 (Hartree/Particle)  
Thermal correction to Energy= 0.529988  
Thermal correction to Enthalpy= 0.530932  
Thermal correction to Gibbs Free Energy= 0.428487  
Sum of electronic and zero-point Energies= -1425.059462  
Sum of electronic and thermal Energies= -1425.027468  
Sum of electronic and thermal Enthalpies= -1425.026524  
Sum of electronic and thermal Free Energies= -1425.128969  
M06-2X /6-311++G (d, p)/SMD// B3LYP /6-31G(d) energy=-1425.380697

### OH<sub>-</sub>anion

| Center<br>Number | Atomic<br>Number | Atomic<br>Type | Coordinates (Angstroms) |          |           |
|------------------|------------------|----------------|-------------------------|----------|-----------|
|                  |                  |                | X                       | Y        | Z         |
| 1                | 8                | 0              | 0.000000                | 0.000000 | 0.109707  |
| 2                | 1                | 0              | 0.000000                | 0.000000 | -0.877653 |

-----  
Zero-point correction= 0.007784 (Hartree/Particle)  
Thermal correction to Energy= 0.010145  
Thermal correction to Enthalpy= 0.011089  
Thermal correction to Gibbs Free Energy= -0.008512  
Sum of electronic and zero-point Energies= -75.712989  
Sum of electronic and thermal Energies= -75.710629  
Sum of electronic and thermal Enthalpies= -75.709685  
Sum of electronic and thermal Free Energies= -75.729285  
M06-2X /6-311++G (d, p)/SMD// B3LYP /6-31G(d) energy=-75.849228

### LiOH<sub>-</sub>1a

| Center<br>Number | Atomic<br>Number | Atomic<br>Type | Coordinates (Angstroms) |           |           |
|------------------|------------------|----------------|-------------------------|-----------|-----------|
|                  |                  |                | X                       | Y         | Z         |
| 1                | 8                | 0              | -4.177876               | -0.257696 | -0.164735 |
| 2                | 3                | 0              | -3.371476               | 1.187568  | 0.292663  |
| 3                | 1                | 0              | -4.872792               | -0.795196 | 0.232895  |
| 4                | 6                | 0              | -0.961512               | 0.087043  | 0.041659  |
| 5                | 6                | 0              | 0.535294                | 0.004212  | 0.021012  |
| 6                | 6                | 0              | 1.264189                | 1.188804  | -0.149029 |
| 7                | 6                | 0              | 1.224815                | -1.206577 | 0.178993  |
| 8                | 6                | 0              | 2.656568                | 1.160263  | -0.186376 |

|    |   |   |           |           |           |
|----|---|---|-----------|-----------|-----------|
| 9  | 1 | 0 | 0.720637  | 2.121779  | -0.252067 |
| 10 | 6 | 0 | 2.618445  | -1.233138 | 0.151650  |
| 11 | 1 | 0 | 0.678442  | -2.128826 | 0.358097  |
| 12 | 6 | 0 | 3.336727  | -0.050722 | -0.037697 |
| 13 | 1 | 0 | 3.212367  | 2.083051  | -0.328612 |
| 14 | 1 | 0 | 3.143047  | -2.175147 | 0.285547  |
| 15 | 1 | 0 | 4.422944  | -0.072522 | -0.061929 |
| 16 | 7 | 0 | -1.679464 | -1.000737 | -0.244089 |
| 17 | 1 | 0 | -1.216398 | -1.825427 | -0.597205 |
| 18 | 8 | 0 | -1.509811 | 1.187589  | 0.329105  |
| 19 | 1 | 0 | -2.763220 | -0.903712 | -0.242319 |

-----  
Zero-point correction= 0.142152 (Hartree/Particle)  
Thermal correction to Energy= 0.152859  
Thermal correction to Enthalpy= 0.153804  
Thermal correction to Gibbs Free Energy= 0.105572  
Sum of electronic and zero-point Energies= -484.240100  
Sum of electronic and thermal Energies= -484.229392  
Sum of electronic and thermal Enthalpies= -484.228448  
Sum of electronic and thermal Free Energies= -484.276679  
M06-2X /6-311++G (d, p)/SMD// B3LYP /6-31G(d) energy=-484.336324

**LiOH\_2a**

| Center Number | Atomic Number | Atomic Type | Coordinates (Angstroms) |           |           |
|---------------|---------------|-------------|-------------------------|-----------|-----------|
|               |               |             | X                       | Y         | Z         |
| 1             | 8             | 0           | 1.203437                | -3.927637 | -0.509294 |
| 2             | 8             | 0           | 0.988715                | -1.858736 | 1.629615  |
| 3             | 6             | 0           | 1.105973                | -1.045741 | 0.721211  |
| 4             | 6             | 0           | 2.471272                | -0.608419 | 0.276896  |
| 5             | 7             | 0           | -0.024697               | -0.543304 | 0.035401  |
| 6             | 6             | 0           | 2.996271                | 0.662985  | 0.537537  |
| 7             | 6             | 0           | 3.253683                | -1.602891 | -0.334035 |
| 8             | 6             | 0           | -1.279898               | -1.158449 | 0.211805  |
| 9             | 6             | 0           | 0.098939                | 0.551355  | -0.947056 |
| 10            | 6             | 0           | 4.314656                | 0.947788  | 0.179070  |
| 11            | 1             | 0           | 2.389563                | 1.421615  | 1.023589  |
| 12            | 6             | 0           | 4.563381                | -1.293097 | -0.701930 |
| 13            | 1             | 0           | 2.800907                | -2.586124 | -0.512944 |
| 14            | 8             | 0           | -1.445759               | -2.274931 | 0.683313  |
| 15            | 8             | 0           | -2.250843               | -0.364511 | -0.233221 |
| 16            | 1             | 0           | 1.096313                | 0.471605  | -1.383469 |
| 17            | 1             | 0           | -0.616228               | 0.354541  | -1.748033 |
| 18            | 6             | 0           | -0.115445               | 1.953412  | -0.397950 |
| 19            | 6             | 0           | 5.095826                | -0.027119 | -0.444627 |
| 20            | 1             | 0           | 4.728844                | 1.930147  | 0.389285  |
| 21            | 1             | 0           | 5.174856                | -2.051260 | -1.184340 |
| 22            | 6             | 0           | -3.675572               | -0.798955 | -0.265801 |
| 23            | 6             | 0           | 0.075619                | 3.037927  | -1.265083 |
| 24            | 6             | 0           | -0.490758               | 2.206774  | 0.924156  |
| 25            | 1             | 0           | 6.121187                | 0.199529  | -0.725866 |
| 26            | 6             | 0           | -4.167748               | -1.040628 | 1.163034  |
| 27            | 6             | 0           | -3.821720               | -2.030527 | -1.162358 |
| 28            | 6             | 0           | -4.363464               | 0.419025  | -0.884563 |
| 29            | 6             | 0           | -0.105193               | 4.346296  | -0.820768 |
| 30            | 1             | 0           | 0.372224                | 2.855457  | -2.296217 |
| 31            | 6             | 0           | -0.668209               | 3.518592  | 1.372830  |
| 32            | 1             | 0           | -0.645200               | 1.380147  | 1.611059  |
| 33            | 1             | 0           | -5.245171               | -1.237566 | 1.143209  |
| 34            | 1             | 0           | -3.666626               | -1.894822 | 1.620799  |
| 35            | 1             | 0           | -3.997010               | -0.153149 | 1.781572  |
| 36            | 1             | 0           | -3.326445               | -2.903068 | -0.733868 |
| 37            | 1             | 0           | -4.885887               | -2.259163 | -1.286063 |
| 38            | 1             | 0           | -3.400621               | -1.835383 | -2.154406 |
| 39            | 1             | 0           | -5.441975               | 0.242516  | -0.947941 |
| 40            | 1             | 0           | -4.191231               | 1.311980  | -0.276018 |

|    |   |   |           |           |           |
|----|---|---|-----------|-----------|-----------|
| 41 | 1 | 0 | -3.984784 | 0.609692  | -1.893739 |
| 42 | 6 | 0 | -0.477859 | 4.591628  | 0.503376  |
| 43 | 1 | 0 | 0.049097  | 5.174888  | -1.506810 |
| 44 | 1 | 0 | -0.956768 | 3.697364  | 2.405252  |
| 45 | 1 | 0 | -0.615998 | 5.611089  | 0.852820  |
| 46 | 3 | 0 | 0.160284  | -3.440483 | 0.740774  |
| 47 | 1 | 0 | 1.110070  | -4.588675 | -1.205747 |

-----  
Zero-point correction= 0.379456 (Hartree/Particle)  
Thermal correction to Energy= 0.404662  
Thermal correction to Enthalpy= 0.405606  
Thermal correction to Gibbs Free Energy= 0.322734  
Sum of electronic and zero-point Energies= -1100.165738  
Sum of electronic and thermal Energies= -1100.140532  
Sum of electronic and thermal Enthalpies= -1100.139588  
Sum of electronic and thermal Free Energies= -1100.222460  
M06-2X /6-311++G (d, p)/SMD// B3LYP /6-31G(d) energy=-1100.415180

### INT1b

-----

| Center<br>Number | Atomic<br>Number | Atomic<br>Type | Coordinates (Angstroms) |           |           |
|------------------|------------------|----------------|-------------------------|-----------|-----------|
|                  |                  |                | X                       | Y         | Z         |
| 1                | 8                | 0              | 2.399750                | 0.106745  | 0.028202  |
| 2                | 6                | 0              | -1.060981               | 0.342009  | -0.026298 |
| 3                | 6                | 0              | -2.514461               | -0.055036 | -0.010145 |
| 4                | 6                | 0              | -3.457089               | 0.903916  | 0.383023  |
| 5                | 6                | 0              | -2.959347               | -1.328558 | -0.391649 |
| 6                | 6                | 0              | -4.813532               | 0.588530  | 0.423351  |
| 7                | 1                | 0              | -3.103128               | 1.893042  | 0.654075  |
| 8                | 6                | 0              | -4.318301               | -1.641785 | -0.363022 |
| 9                | 1                | 0              | -2.249570               | -2.072180 | -0.744563 |
| 10               | 6                | 0              | -5.247806               | -0.686251 | 0.051583  |
| 11               | 1                | 0              | -5.534120               | 1.337565  | 0.741227  |
| 12               | 1                | 0              | -4.650951               | -2.629469 | -0.670950 |
| 13               | 1                | 0              | -6.306264               | -0.931594 | 0.077589  |
| 14               | 7                | 0              | -0.141183               | -0.624133 | 0.076291  |
| 15               | 1                | 0              | -0.445615               | -1.568194 | 0.267289  |
| 16               | 8                | 0              | -0.762582               | 1.554842  | -0.131277 |
| 17               | 1                | 0              | 0.927957                | -0.404519 | 0.066948  |
| 18               | 6                | 0              | 3.406314                | -0.847739 | 0.089187  |
| 19               | 6                | 0              | 3.304215                | -1.817279 | -1.114122 |
| 20               | 1                | 0              | 4.095472                | -2.579259 | -1.115538 |
| 21               | 1                | 0              | 2.336037                | -2.333822 | -1.103464 |
| 22               | 1                | 0              | 3.367725                | -1.251638 | -2.052012 |
| 23               | 6                | 0              | 3.302610                | -1.657249 | 1.405425  |
| 24               | 1                | 0              | 2.339228                | -2.180769 | 1.454856  |
| 25               | 1                | 0              | 4.099389                | -2.406328 | 1.509488  |
| 26               | 1                | 0              | 3.354192                | -0.975653 | 2.263284  |
| 27               | 6                | 0              | 4.786262                | -0.148647 | 0.046367  |
| 28               | 1                | 0              | 4.879036                | 0.433154  | -0.880606 |
| 29               | 1                | 0              | 4.879254                | 0.542606  | 0.894526  |
| 30               | 1                | 0              | 5.626457                | -0.854776 | 0.089235  |
| 31               | 19               | 0              | 1.668870                | 2.376137  | -0.217001 |

-----  
Zero-point correction= 0.252294 (Hartree/Particle)  
Thermal correction to Energy= 0.269531  
Thermal correction to Enthalpy= 0.270475  
Thermal correction to Gibbs Free Energy= 0.203666  
Sum of electronic and zero-point Energies= -1233.735397  
Sum of electronic and thermal Energies= -1233.718161  
Sum of electronic and thermal Enthalpies= -1233.717217  
Sum of electronic and thermal Free Energies= -1233.784026  
M06-2X /6-311++G (d, p)/SMD// B3LYP /6-31G(d) energy=-1233.925844

### INT2b

| Center<br>Number | Atomic<br>Number | Atomic<br>Type | Coordinates (Angstroms) |           |           | Z |
|------------------|------------------|----------------|-------------------------|-----------|-----------|---|
|                  |                  |                | X                       | Y         |           |   |
| 1                | 8                | 0              | 1.129594                | 1.798424  | 1.790136  |   |
| 2                | 8                | 0              | -0.507348               | 0.569945  | -1.746677 |   |
| 3                | 6                | 0              | 0.670428                | 0.712582  | -1.422398 |   |
| 4                | 6                | 0              | 1.420608                | 1.913503  | -1.918335 |   |
| 5                | 7                | 0              | 1.332422                | -0.187030 | -0.575542 |   |
| 6                | 6                | 0              | 1.416403                | 2.199442  | -3.289856 |   |
| 7                | 6                | 0              | 1.979479                | 2.818003  | -1.000201 |   |
| 8                | 6                | 0              | 0.589324                | -0.988044 | 0.317754  |   |
| 9                | 6                | 0              | 2.808129                | -0.219511 | -0.472744 |   |
| 10               | 6                | 0              | 2.014604                | 3.369264  | -3.754227 |   |
| 11               | 1                | 0              | 0.948515                | 1.505931  | -3.983026 |   |
| 12               | 6                | 0              | 2.549235                | 3.999671  | -1.477986 |   |
| 13               | 1                | 0              | 1.908554                | 2.590096  | 0.073368  |   |
| 14               | 8                | 0              | -0.620931               | -0.923498 | 0.462122  |   |
| 15               | 8                | 0              | 1.403865                | -1.818799 | 0.964460  |   |
| 16               | 1                | 0              | 3.177850                | 0.655943  | -1.005280 |   |
| 17               | 1                | 0              | 3.074117                | -0.090075 | 0.576766  |   |
| 18               | 6                | 0              | 3.441818                | -1.465186 | -1.064697 |   |
| 19               | 6                | 0              | 2.580649                | 4.270625  | -2.847960 |   |
| 20               | 1                | 0              | 2.030566                | 3.583027  | -4.819532 |   |
| 21               | 1                | 0              | 2.968791                | 4.712056  | -0.772071 |   |
| 22               | 6                | 0              | 0.899306                | -2.823459 | 1.930131  |   |
| 23               | 6                | 0              | 4.572646                | -2.019346 | -0.453737 |   |
| 24               | 6                | 0              | 2.968787                | -2.040611 | -2.249858 |   |
| 25               | 1                | 0              | 3.037986                | 5.187472  | -3.211380 |   |
| 26               | 6                | 0              | 0.044868                | -3.847953 | 1.178614  |   |
| 27               | 6                | 0              | 0.140010                | -2.144902 | 3.072967  |   |
| 28               | 6                | 0              | 2.196348                | -3.455641 | 2.439987  |   |
| 29               | 6                | 0              | 5.219201                | -3.122044 | -1.014261 |   |
| 30               | 1                | 0              | 4.946947                | -1.584779 | 0.470357  |   |
| 31               | 6                | 0              | 3.608287                | -3.147941 | -2.808726 |   |
| 32               | 1                | 0              | 2.088922                | -1.627348 | -2.736493 |   |
| 33               | 1                | 0              | -0.246144               | -4.652659 | 1.862897  |   |
| 34               | 1                | 0              | -0.861971               | -3.387951 | 0.780049  |   |
| 35               | 1                | 0              | 0.614714                | -4.289554 | 0.354144  |   |
| 36               | 1                | 0              | -0.831953               | -1.774535 | 2.744664  |   |
| 37               | 1                | 0              | -0.014469               | -2.870662 | 3.879680  |   |
| 38               | 1                | 0              | 0.720893                | -1.306492 | 3.468657  |   |
| 39               | 1                | 0              | 1.964706                | -4.270772 | 3.133437  |   |
| 40               | 1                | 0              | 2.783580                | -3.856959 | 1.608616  |   |
| 41               | 1                | 0              | 2.804720                | -2.714155 | 2.967662  |   |
| 42               | 6                | 0              | 4.737208                | -3.692157 | -2.193833 |   |
| 43               | 1                | 0              | 6.095567                | -3.539161 | -0.524843 |   |
| 44               | 1                | 0              | 3.224867                | -3.584200 | -3.727633 |   |
| 45               | 1                | 0              | 5.236246                | -4.553692 | -2.629369 |   |
| 46               | 6                | 0              | 1.708864                | 2.225612  | 2.964016  |   |
| 47               | 6                | 0              | 2.978653                | 1.390925  | 3.288771  |   |
| 48               | 1                | 0              | 2.714505                | 0.327588  | 3.355878  |   |
| 49               | 1                | 0              | 3.709731                | 1.503399  | 2.477895  |   |
| 50               | 1                | 0              | 3.465647                | 1.684928  | 4.229574  |   |
| 51               | 6                | 0              | 2.125372                | 3.719594  | 2.872523  |   |
| 52               | 1                | 0              | 2.858394                | 3.855359  | 2.066915  |   |
| 53               | 1                | 0              | 1.247223                | 4.333832  | 2.631860  |   |
| 54               | 1                | 0              | 2.568936                | 4.105406  | 3.801600  |   |
| 55               | 6                | 0              | 0.721696                | 2.081017  | 4.158512  |   |
| 56               | 1                | 0              | -0.165514               | 2.710466  | 3.989654  |   |
| 57               | 1                | 0              | 0.386812                | 1.038415  | 4.240267  |   |
| 58               | 1                | 0              | 1.153405                | 2.375775  | 5.125578  |   |
| 59               | 19               | 0              | -1.267414               | 1.681793  | 1.105465  |   |
| 60               | 6                | 0              | -4.090257               | 0.100211  | -0.498263 |   |
| 61               | 6                | 0              | -5.543507               | -0.274832 | -0.564792 |   |
| 62               | 6                | 0              | -6.338521               | -0.017438 | 0.559698  |   |
| 63               | 6                | 0              | -6.131751               | -0.844756 | -1.702881 |   |
| 64               | 6                | 0              | -7.691474               | -0.348643 | 0.557400  |   |



|    |   |   |           |           |           |
|----|---|---|-----------|-----------|-----------|
| 65 | 1 | 0 | -5.875608 | 0.443237  | 1.426118  |
| 66 | 6 | 0 | -7.488725 | -1.166746 | -1.708480 |
| 67 | 1 | 0 | -5.543448 | -1.004941 | -2.602512 |
| 68 | 6 | 0 | -8.269174 | -0.925770 | -0.576253 |
| 69 | 1 | 0 | -8.297421 | -0.153833 | 1.438056  |
| 70 | 1 | 0 | -7.937443 | -1.597803 | -2.599225 |
| 71 | 1 | 0 | -9.325801 | -1.179574 | -0.580307 |
| 72 | 7 | 0 | -3.251460 | -0.543018 | -1.341144 |
| 73 | 1 | 0 | -3.553076 | -1.366855 | -1.837988 |
| 74 | 8 | 0 | -3.698422 | 0.969863  | 0.294350  |
| 75 | 1 | 0 | -2.250352 | -0.350961 | -1.301510 |

-----  
Zero-point correction= 0.618786 (Hartree/Particle)  
Thermal correction to Energy= 0.660053  
Thermal correction to Enthalpy= 0.660997  
Thermal correction to Gibbs Free Energy= 0.536477  
Sum of electronic and zero-point Energies= -2250.508602  
Sum of electronic and thermal Energies= -2250.467334  
Sum of electronic and thermal Enthalpies= -2250.466390  
Sum of electronic and thermal Free Energies= -2250.590910  
M06-2X /6-311++G (d, p)/SMD// B3LYP /6-31G(d) energy=-2250.930873

### INT3b

| Center<br>Number | Atomic<br>Number | Atomic<br>Type | Coordinates (Angstroms) |           |           |
|------------------|------------------|----------------|-------------------------|-----------|-----------|
|                  |                  |                | X                       | Y         | Z         |
| 1                | 8                | 0              | -2.409351               | -1.336964 | -0.902948 |
| 2                | 8                | 0              | -0.842760               | 0.169637  | -1.493097 |
| 3                | 6                | 0              | -1.852537               | 0.058027  | -0.680562 |
| 4                | 6                | 0              | -2.996002               | 1.068931  | -0.984822 |
| 5                | 7                | 0              | -1.409941               | 0.150664  | 0.809672  |
| 6                | 6                | 0              | -2.956811               | 1.678349  | -2.244841 |
| 7                | 6                | 0              | -4.072549               | 1.381888  | -0.141105 |
| 8                | 6                | 0              | -0.571649               | -0.820810 | 1.290391  |
| 9                | 6                | 0              | -1.404659               | 1.461330  | 1.499324  |
| 10               | 6                | 0              | -3.958758               | 2.558524  | -2.655902 |
| 11               | 1                | 0              | -2.115018               | 1.445092  | -2.886989 |
| 12               | 6                | 0              | -5.070957               | 2.272585  | -0.541087 |
| 13               | 1                | 0              | -4.140707               | 0.938061  | 0.846727  |
| 14               | 8                | 0              | -0.220998               | -1.844289 | 0.702065  |
| 15               | 8                | 0              | -0.177455               | -0.541641 | 2.564479  |
| 16               | 1                | 0              | -2.228345               | 2.039835  | 1.087978  |
| 17               | 1                | 0              | -1.626188               | 1.292663  | 2.555241  |
| 18               | 6                | 0              | -0.140793               | 2.303531  | 1.378950  |
| 19               | 6                | 0              | -5.021852               | 2.862406  | -1.805038 |
| 20               | 1                | 0              | -3.903441               | 3.013588  | -3.642091 |
| 21               | 1                | 0              | -5.887760               | 2.503164  | 0.138629  |
| 22               | 6                | 0              | 0.749019                | -1.418339 | 3.293530  |
| 23               | 6                | 0              | 0.594738                | 2.645223  | 2.520272  |
| 24               | 6                | 0              | 0.260677                | 2.830931  | 0.142369  |
| 25               | 1                | 0              | -5.799672               | 3.554006  | -2.118545 |
| 26               | 6                | 0              | 2.100775                | -1.484829 | 2.573698  |
| 27               | 6                | 0              | 0.128103                | -2.805082 | 3.501360  |
| 28               | 6                | 0              | 0.897120                | -0.700412 | 4.639375  |
| 29               | 6                | 0              | 1.710752                | 3.481117  | 2.436079  |
| 30               | 1                | 0              | 0.284487                | 2.255170  | 3.485915  |
| 31               | 6                | 0              | 1.375951                | 3.667233  | 0.054080  |
| 32               | 1                | 0              | -0.290160               | 2.561838  | -0.753683 |
| 33               | 1                | 0              | 2.826609                | -2.013272 | 3.202638  |
| 34               | 1                | 0              | 2.016226                | -2.006791 | 1.619917  |
| 35               | 1                | 0              | 2.480515                | -0.474460 | 2.389021  |
| 36               | 1                | 0              | 0.019393                | -3.333849 | 2.554012  |
| 37               | 1                | 0              | 0.766317                | -3.397187 | 4.167493  |
| 38               | 1                | 0              | -0.857784               | -2.712995 | 3.970944  |
| 39               | 1                | 0              | 1.553863                | -1.274266 | 5.301820  |
| 40               | 1                | 0              | 1.330558                | 0.294845  | 4.501496  |

|    |    |   |           |           |           |
|----|----|---|-----------|-----------|-----------|
| 41 | 1  | 0 | -0.076786 | -0.590777 | 5.127891  |
| 42 | 6  | 0 | 2.106793  | 3.994623  | 1.200483  |
| 43 | 1  | 0 | 2.266943  | 3.733105  | 3.335586  |
| 44 | 1  | 0 | 1.664400  | 4.076555  | -0.911548 |
| 45 | 1  | 0 | 2.969718  | 4.652159  | 1.131563  |
| 46 | 6  | 0 | -3.523067 | -2.071981 | -0.342942 |
| 47 | 6  | 0 | -3.688764 | -1.947979 | 1.180372  |
| 48 | 1  | 0 | -2.787280 | -2.284288 | 1.699097  |
| 49 | 1  | 0 | -3.906517 | -0.928144 | 1.499036  |
| 50 | 1  | 0 | -4.523040 | -2.582717 | 1.502805  |
| 51 | 6  | 0 | -4.833458 | -1.729349 | -1.076236 |
| 52 | 1  | 0 | -5.192108 | -0.727150 | -0.838605 |
| 53 | 1  | 0 | -4.675497 | -1.783047 | -2.158860 |
| 54 | 1  | 0 | -5.619306 | -2.445582 | -0.805359 |
| 55 | 6  | 0 | -3.157239 | -3.536796 | -0.660226 |
| 56 | 1  | 0 | -3.050352 | -3.678033 | -1.743627 |
| 57 | 1  | 0 | -2.218358 | -3.806587 | -0.163771 |
| 58 | 1  | 0 | -3.937523 | -4.223634 | -0.312595 |
| 59 | 19 | 0 | -0.163367 | -2.299030 | -1.912700 |
| 60 | 6  | 0 | 2.777326  | -0.534167 | -1.671372 |
| 61 | 6  | 0 | 4.260531  | -0.304408 | -1.551519 |
| 62 | 6  | 0 | 5.105186  | -1.409895 | -1.717410 |
| 63 | 6  | 0 | 4.827322  | 0.953803  | -1.302624 |
| 64 | 6  | 0 | 6.487060  | -1.267247 | -1.615183 |
| 65 | 1  | 0 | 4.653709  | -2.373512 | -1.928072 |
| 66 | 6  | 0 | 6.211191  | 1.098241  | -1.206988 |
| 67 | 1  | 0 | 4.198142  | 1.834435  | -1.206911 |
| 68 | 6  | 0 | 7.043757  | -0.012193 | -1.358039 |
| 69 | 1  | 0 | 7.131138  | -2.133838 | -1.738885 |
| 70 | 1  | 0 | 6.639017  | 2.079626  | -1.020717 |
| 71 | 1  | 0 | 8.121921  | 0.101583  | -1.281683 |
| 72 | 7  | 0 | 1.958634  | 0.414692  | -1.183763 |
| 73 | 1  | 0 | 2.312628  | 1.191486  | -0.645936 |
| 74 | 8  | 0 | 2.352092  | -1.575576 | -2.206744 |
| 75 | 1  | 0 | 0.927912  | 0.318141  | -1.236368 |

-----  
Zero-point correction= 0.621947 (Hartree/Particle)  
Thermal correction to Energy= 0.661051  
Thermal correction to Enthalpy= 0.661995  
Thermal correction to Gibbs Free Energy= 0.547565  
Sum of electronic and zero-point Energies= -2250.505112  
Sum of electronic and thermal Energies= -2250.466009  
Sum of electronic and thermal Enthalpies= -2250.465065  
Sum of electronic and thermal Free Energies= -2250.579495  
M06-2X /6-311++G (d, p)/SMD// B3LYP /6-31G(d) energy=-2250.944486

#### INT4b

| Center Number | Atomic Number | Atomic Type | Coordinates (Angstroms) |           |           |
|---------------|---------------|-------------|-------------------------|-----------|-----------|
|               |               |             | X                       | Y         | Z         |
| 1             | 8             | 0           | -5.063583               | -1.855757 | 0.499717  |
| 2             | 8             | 0           | -2.959671               | -1.356782 | -0.185535 |
| 3             | 6             | 0           | -4.077881               | -1.007310 | 0.178590  |
| 4             | 6             | 0           | -4.495202               | 0.417576  | 0.313786  |
| 5             | 7             | 0           | 2.075894                | -1.116239 | 0.469858  |
| 6             | 6             | 0           | -3.571358               | 1.424033  | -0.007281 |
| 7             | 6             | 0           | -5.781683               | 0.768650  | 0.754191  |
| 8             | 6             | 0           | 2.506958                | -2.007406 | -0.418923 |
| 9             | 6             | 0           | 2.767381                | -0.976949 | 1.752199  |
| 10            | 6             | 0           | -3.933619               | 2.764260  | 0.112746  |
| 11            | 1             | 0           | -2.573781               | 1.170400  | -0.349730 |
| 12            | 6             | 0           | -6.136342               | 2.110024  | 0.872436  |
| 13            | 1             | 0           | -6.493664               | -0.010220 | 1.001288  |
| 14            | 8             | 0           | 1.916288                | -2.256358 | -1.501206 |
| 15            | 8             | 0           | 3.677608                | -2.679770 | -0.094508 |
| 16            | 1             | 0           | 2.009463                | -0.870031 | 2.541865  |

|    |    |   |           |           |           |
|----|----|---|-----------|-----------|-----------|
| 17 | 1  | 0 | 3.355223  | -1.871614 | 1.993773  |
| 18 | 6  | 0 | 3.679001  | 0.243392  | 1.820815  |
| 19 | 6  | 0 | -5.213481 | 3.109466  | 0.552117  |
| 20 | 1  | 0 | -3.210789 | 3.535256  | -0.138658 |
| 21 | 1  | 0 | -7.132573 | 2.376431  | 1.214578  |
| 22 | 6  | 0 | 4.180508  | -3.790899 | -0.890485 |
| 23 | 6  | 0 | 4.764859  | 0.375170  | 0.940140  |
| 24 | 6  | 0 | 3.435173  | 1.279761  | 2.729996  |
| 25 | 1  | 0 | -5.492823 | 4.155717  | 0.645633  |
| 26 | 6  | 0 | 4.593434  | -3.312120 | -2.288698 |
| 27 | 6  | 0 | 3.146355  | -4.923375 | -0.956515 |
| 28 | 6  | 0 | 5.412680  | -4.246211 | -0.099094 |
| 29 | 6  | 0 | 5.576493  | 1.509153  | 0.969206  |
| 30 | 1  | 0 | 4.963405  | -0.423373 | 0.230976  |
| 31 | 6  | 0 | 4.245844  | 2.418792  | 2.764745  |
| 32 | 1  | 0 | 2.594362  | 1.196405  | 3.416070  |
| 33 | 1  | 0 | 5.056717  | -4.134758 | -2.847136 |
| 34 | 1  | 0 | 3.724756  | -2.946632 | -2.837229 |
| 35 | 1  | 0 | 5.327403  | -2.501739 | -2.208134 |
| 36 | 1  | 0 | 2.262107  | -4.601229 | -1.508295 |
| 37 | 1  | 0 | 3.579619  | -5.799885 | -1.453125 |
| 38 | 1  | 0 | 2.846615  | -5.219482 | 0.055745  |
| 39 | 1  | 0 | 5.901360  | -5.088838 | -0.601206 |
| 40 | 1  | 0 | 6.136198  | -3.428792 | -0.010983 |
| 41 | 1  | 0 | 5.128452  | -4.560863 | 0.910799  |
| 42 | 6  | 0 | 5.318867  | 2.539138  | 1.880403  |
| 43 | 1  | 0 | 6.414952  | 1.590669  | 0.281316  |
| 44 | 1  | 0 | 4.037603  | 3.209812  | 3.481661  |
| 45 | 1  | 0 | 5.952677  | 3.422159  | 1.903066  |
| 46 | 6  | 0 | -4.907253 | -3.325620 | 0.465376  |
| 47 | 6  | 0 | -6.289759 | -3.812681 | 0.906794  |
| 48 | 1  | 0 | -6.528286 | -3.442584 | 1.908934  |
| 49 | 1  | 0 | -7.062611 | -3.462725 | 0.215007  |
| 50 | 1  | 0 | -6.312567 | -4.907090 | 0.926921  |
| 51 | 6  | 0 | -4.603399 | -3.788050 | -0.963105 |
| 52 | 1  | 0 | -5.356736 | -3.401344 | -1.657788 |
| 53 | 1  | 0 | -3.617811 | -3.455569 | -1.292571 |
| 54 | 1  | 0 | -4.633530 | -4.882417 | -1.004881 |
| 55 | 6  | 0 | -3.834549 | -3.759616 | 1.468861  |
| 56 | 1  | 0 | -2.844691 | -3.406360 | 1.175547  |
| 57 | 1  | 0 | -4.065902 | -3.372383 | 2.466897  |
| 58 | 1  | 0 | -3.811093 | -4.853406 | 1.526276  |
| 59 | 19 | 0 | -0.378673 | -1.199577 | -0.879986 |
| 60 | 6  | 0 | 0.595427  | 2.153173  | -0.840037 |
| 61 | 6  | 0 | 0.497896  | 3.648482  | -0.969406 |
| 62 | 6  | 0 | -0.460917 | 4.170151  | -1.848482 |
| 63 | 6  | 0 | 1.300227  | 4.529646  | -0.230865 |
| 64 | 6  | 0 | -0.600632 | 5.547662  | -2.004910 |
| 65 | 1  | 0 | -1.083757 | 3.476180  | -2.403459 |
| 66 | 6  | 0 | 1.153438  | 5.908855  | -0.381426 |
| 67 | 1  | 0 | 2.020450  | 4.146873  | 0.487558  |
| 68 | 6  | 0 | 0.207758  | 6.420397  | -1.271920 |
| 69 | 1  | 0 | -1.338421 | 5.941757  | -2.698843 |
| 70 | 1  | 0 | 1.774287  | 6.583505  | 0.201796  |
| 71 | 1  | 0 | 0.097802  | 7.495094  | -1.390678 |
| 72 | 7  | 0 | 1.754110  | 1.637882  | -0.405997 |
| 73 | 1  | 0 | 2.551367  | 2.223708  | -0.205696 |
| 74 | 8  | 0 | -0.382278 | 1.437466  | -1.142484 |
| 75 | 1  | 0 | 1.844732  | 0.622158  | -0.179967 |

-----  
Zero-point correction= 0.619987 (Hartree/Particle)  
Thermal correction to Energy= 0.661047  
Thermal correction to Enthalpy= 0.661991  
Thermal correction to Gibbs Free Energy= 0.535526  
Sum of electronic and zero-point Energies= -2250.551905  
Sum of electronic and thermal Energies= -2250.510845  
Sum of electronic and thermal Enthalpies= -2250.509901

Sum of electronic and thermal Free Energies= -2250.636366  
M06-2X /6-311++G (d, p)/SMD// B3LYP /6-31G(d) energy=-2250.963451

**INT5b**

| Center<br>Number | Atomic<br>Number | Atomic<br>Type | Coordinates (Angstroms) |           |           |
|------------------|------------------|----------------|-------------------------|-----------|-----------|
|                  |                  |                | X                       | Y         | Z         |
| 1                | 8                | 0              | 5.383926                | -1.464770 | 0.991871  |
| 2                | 8                | 0              | 3.172258                | -1.135444 | 0.611268  |
| 3                | 6                | 0              | 4.348754                | -0.891203 | 0.362054  |
| 4                | 6                | 0              | 4.790742                | 0.075680  | -0.681880 |
| 5                | 7                | 0              | -2.990653               | -0.437544 | -0.578744 |
| 6                | 6                | 0              | 3.835565                | 0.920518  | -1.268457 |
| 7                | 6                | 0              | 6.130853                | 0.142858  | -1.097191 |
| 8                | 6                | 0              | -2.762462               | -1.758392 | -0.698750 |
| 9                | 6                | 0              | -4.221238               | 0.267624  | -0.916489 |
| 10               | 6                | 0              | 4.221423                | 1.814068  | -2.266258 |
| 11               | 1                | 0              | 2.797882                | 0.909259  | -0.947528 |
| 12               | 6                | 0              | 6.506768                | 1.036087  | -2.097087 |
| 13               | 1                | 0              | 6.866447                | -0.508346 | -0.638964 |
| 14               | 8                | 0              | -1.674843               | -2.291649 | -0.435062 |
| 15               | 8                | 0              | -3.852116               | -2.441394 | -1.135933 |
| 16               | 1                | 0              | -3.946978               | 1.159507  | -1.492184 |
| 17               | 1                | 0              | -4.815042               | -0.375259 | -1.570188 |
| 18               | 6                | 0              | -5.037008               | 0.686865  | 0.296499  |
| 19               | 6                | 0              | 5.552540                | 1.871841  | -2.684308 |
| 20               | 1                | 0              | 3.471532                | 2.460434  | -2.712928 |
| 21               | 1                | 0              | 7.543515                | 1.080233  | -2.419379 |
| 22               | 6                | 0              | -3.795524               | -3.875585 | -1.447346 |
| 23               | 6                | 0              | -5.523274               | -0.272297 | 1.195773  |
| 24               | 6                | 0              | -5.322488               | 2.035405  | 0.532738  |
| 25               | 1                | 0              | 5.848339                | 2.567653  | -3.465273 |
| 26               | 6                | 0              | -3.494061               | -4.682507 | -0.179567 |
| 27               | 6                | 0              | -2.775284               | -4.137796 | -2.560933 |
| 28               | 6                | 0              | -5.216284               | -4.163356 | -1.942592 |
| 29               | 6                | 0              | -6.276053               | 0.110665  | 2.304373  |
| 30               | 1                | 0              | -5.307668               | -1.322784 | 1.018480  |
| 31               | 6                | 0              | -6.078487               | 2.423238  | 1.642331  |
| 32               | 1                | 0              | -4.950776               | 2.789487  | -0.158247 |
| 33               | 1                | 0              | -3.569550               | -5.754046 | -0.397498 |
| 34               | 1                | 0              | -2.491838               | -4.465084 | 0.191687  |
| 35               | 1                | 0              | -4.221469               | -4.443997 | 0.604380  |
| 36               | 1                | 0              | -1.760891               | -3.922213 | -2.222058 |
| 37               | 1                | 0              | -2.829410               | -5.187694 | -2.870572 |
| 38               | 1                | 0              | -2.996935               | -3.514391 | -3.434266 |
| 39               | 1                | 0              | -5.315224               | -5.220570 | -2.210625 |
| 40               | 1                | 0              | -5.951027               | -3.933210 | -1.164191 |
| 41               | 1                | 0              | -5.448902               | -3.558850 | -2.825297 |
| 42               | 6                | 0              | -6.556313               | 1.461392  | 2.531653  |
| 43               | 1                | 0              | -6.647741               | -0.644744 | 2.992271  |
| 44               | 1                | 0              | -6.289251               | 3.476163  | 1.811389  |
| 45               | 1                | 0              | -7.142804               | 1.759567  | 3.396747  |
| 46               | 6                | 0              | 5.218212                | -2.473677 | 2.058402  |
| 47               | 6                | 0              | 6.666962                | -2.803207 | 2.427433  |
| 48               | 1                | 0              | 7.205786                | -3.204603 | 1.563036  |
| 49               | 1                | 0              | 7.190491                | -1.907373 | 2.775969  |
| 50               | 1                | 0              | 6.688824                | -3.551080 | 3.226840  |
| 51               | 6                | 0              | 4.483132                | -1.855681 | 3.252008  |
| 52               | 1                | 0              | 4.992743                | -0.944418 | 3.582493  |
| 53               | 1                | 0              | 3.449978                | -1.609447 | 3.002153  |
| 54               | 1                | 0              | 4.482191                | -2.566029 | 4.086183  |
| 55               | 6                | 0              | 4.507203                | -3.712307 | 1.503746  |
| 56               | 1                | 0              | 3.471311                | -3.493883 | 1.239647  |
| 57               | 1                | 0              | 5.028115                | -4.085486 | 0.615410  |
| 58               | 1                | 0              | 4.514994                | -4.505458 | 2.259565  |
| 59               | 19               | 0              | 0.555310                | -0.930843 | 0.058603  |

|    |   |   |           |          |           |
|----|---|---|-----------|----------|-----------|
| 60 | 6 | 0 | -0.159430 | 1.993069 | -0.178047 |
| 61 | 6 | 0 | -0.126710 | 3.508046 | -0.058894 |
| 62 | 6 | 0 | 1.045400  | 4.194457 | -0.402536 |
| 63 | 6 | 0 | -1.238340 | 4.251757 | 0.361360  |
| 64 | 6 | 0 | 1.116786  | 5.582884 | -0.300807 |
| 65 | 1 | 0 | 1.896101  | 3.616420 | -0.747995 |
| 66 | 6 | 0 | -1.176558 | 5.643100 | 0.449136  |
| 67 | 1 | 0 | -2.167832 | 3.740503 | 0.600450  |
| 68 | 6 | 0 | 0.004407  | 6.313228 | 0.124829  |
| 69 | 1 | 0 | 2.039165  | 6.098351 | -0.558332 |
| 70 | 1 | 0 | -2.052010 | 6.204363 | 0.767013  |
| 71 | 1 | 0 | 0.055633  | 7.396809 | 0.197272  |
| 72 | 7 | 0 | -0.985242 | 1.274401 | 0.580007  |
| 73 | 1 | 0 | -1.476393 | 1.864691 | 1.249620  |
| 74 | 8 | 0 | 0.636169  | 1.464418 | -1.015923 |
| 75 | 1 | 0 | -2.219502 | 0.133628 | -0.164330 |

-----  
Zero-point correction= 0.620541 (Hartree/Particle)  
Thermal correction to Energy= 0.661576  
Thermal correction to Enthalpy= 0.662520  
Thermal correction to Gibbs Free Energy= 0.535383  
Sum of electronic and zero-point Energies= -2250.553745  
Sum of electronic and thermal Energies= -2250.512710  
Sum of electronic and thermal Enthalpies= -2250.511766  
Sum of electronic and thermal Free Energies= -2250.638903  
M06-2X /6-311++G (d, p)/SMD// B3LYP /6-31G(d) energy=-2250.964822

#### INT6b

| Center<br>Number | Atomic<br>Number | Atomic<br>Type | Coordinates (Angstroms) |           |           |
|------------------|------------------|----------------|-------------------------|-----------|-----------|
|                  |                  |                | X                       | Y         | Z         |
| 1                | 8                | 0              | -4.109928               | -1.346399 | 1.143774  |
| 2                | 8                | 0              | -2.936357               | -1.527230 | -0.791608 |
| 3                | 6                | 0              | -3.974788               | -1.296504 | -0.178978 |
| 4                | 6                | 0              | -5.251348               | -0.927936 | -0.862512 |
| 5                | 7                | 0              | 2.670404                | 0.053631  | -1.379402 |
| 6                | 6                | 0              | -5.279759               | -0.918370 | -2.263945 |
| 7                | 6                | 0              | -6.408656               | -0.592117 | -0.144782 |
| 8                | 6                | 0              | 1.975833                | -0.191037 | -0.091371 |
| 9                | 6                | 0              | 3.822032                | 0.965109  | -1.363760 |
| 10               | 6                | 0              | -6.447660               | -0.577332 | -2.940811 |
| 11               | 1                | 0              | -4.380293               | -1.185226 | -2.808683 |
| 12               | 6                | 0              | -7.575192               | -0.248291 | -0.824861 |
| 13               | 1                | 0              | -6.385425               | -0.600276 | 0.938696  |
| 14               | 8                | 0              | 1.060682                | -1.092090 | -0.158466 |
| 15               | 8                | 0              | 2.996923                | -0.288498 | 0.918151  |
| 16               | 1                | 0              | 3.793599                | 1.533710  | -2.305279 |
| 17               | 1                | 0              | 3.752529                | 1.709700  | -0.557534 |
| 18               | 6                | 0              | 5.172466                | 0.272807  | -1.288205 |
| 19               | 6                | 0              | -7.597145               | -0.240502 | -2.221511 |
| 20               | 1                | 0              | -6.463313               | -0.573535 | -4.027119 |
| 21               | 1                | 0              | -8.468357               | 0.013934  | -0.264824 |
| 22               | 6                | 0              | 3.180290                | -1.490109 | 1.701795  |
| 23               | 6                | 0              | 6.246109                | 0.885575  | -0.631969 |
| 24               | 6                | 0              | 5.395998                | -0.949399 | -1.933884 |
| 25               | 1                | 0              | -8.508681               | 0.027369  | -2.748936 |
| 26               | 6                | 0              | 3.417810                | -2.725097 | 0.819073  |
| 27               | 6                | 0              | 1.989946                | -1.708821 | 2.651020  |
| 28               | 6                | 0              | 4.445596                | -1.178275 | 2.513499  |
| 29               | 6                | 0              | 7.513172                | 0.298163  | -0.621385 |
| 30               | 1                | 0              | 6.086572                | 1.831626  | -0.117937 |
| 31               | 6                | 0              | 6.659559                | -1.541562 | -1.924939 |
| 32               | 1                | 0              | 4.558066                | -1.434833 | -2.425187 |
| 33               | 1                | 0              | 3.629211                | -3.599084 | 1.448668  |
| 34               | 1                | 0              | 2.537777                | -2.926172 | 0.206521  |
| 35               | 1                | 0              | 4.275411                | -2.559242 | 0.160222  |

|    |    |   |           |           |           |
|----|----|---|-----------|-----------|-----------|
| 36 | 1  | 0 | 1.086071  | -1.907781 | 2.074236  |
| 37 | 1  | 0 | 2.188070  | -2.551770 | 3.325458  |
| 38 | 1  | 0 | 1.828435  | -0.814093 | 3.265686  |
| 39 | 1  | 0 | 4.696437  | -2.017882 | 3.172423  |
| 40 | 1  | 0 | 5.291094  | -0.990858 | 1.844499  |
| 41 | 1  | 0 | 4.294282  | -0.286234 | 3.132134  |
| 42 | 6  | 0 | 7.725255  | -0.919553 | -1.269729 |
| 43 | 1  | 0 | 8.332150  | 0.788959  | -0.100666 |
| 44 | 1  | 0 | 6.813139  | -2.493048 | -2.429242 |
| 45 | 1  | 0 | 8.709214  | -1.381866 | -1.260507 |
| 46 | 6  | 0 | -3.001581 | -1.677706 | 2.080931  |
| 47 | 6  | 0 | -3.705542 | -1.588232 | 3.437480  |
| 48 | 1  | 0 | -4.073464 | -0.572766 | 3.617380  |
| 49 | 1  | 0 | -4.554101 | -2.278643 | 3.482462  |
| 50 | 1  | 0 | -3.004781 | -1.847882 | 4.237209  |
| 51 | 6  | 0 | -2.510660 | -3.101772 | 1.812809  |
| 52 | 1  | 0 | -3.340163 | -3.814878 | 1.874261  |
| 53 | 1  | 0 | -2.041910 | -3.183027 | 0.831013  |
| 54 | 1  | 0 | -1.767630 | -3.374467 | 2.569798  |
| 55 | 6  | 0 | -1.885250 | -0.634839 | 1.979483  |
| 56 | 1  | 0 | -1.235874 | -0.777327 | 1.113858  |
| 57 | 1  | 0 | -2.307148 | 0.376084  | 1.958413  |
| 58 | 1  | 0 | -1.249813 | -0.713413 | 2.868462  |
| 59 | 19 | 0 | -0.648615 | -0.998480 | -1.953230 |
| 60 | 6  | 0 | 0.382692  | 1.848359  | -0.316154 |
| 61 | 6  | 0 | -0.231362 | 3.070731  | 0.318286  |
| 62 | 6  | 0 | -0.851631 | 4.006025  | -0.521039 |
| 63 | 6  | 0 | -0.228620 | 3.298353  | 1.702007  |
| 64 | 6  | 0 | -1.435099 | 5.155749  | 0.007211  |
| 65 | 1  | 0 | -0.863507 | 3.810033  | -1.588132 |
| 66 | 6  | 0 | -0.821177 | 4.444385  | 2.232569  |
| 67 | 1  | 0 | 0.213880  | 2.568572  | 2.374857  |
| 68 | 6  | 0 | -1.420783 | 5.379008  | 1.386228  |
| 69 | 1  | 0 | -1.902858 | 5.878646  | -0.656251 |
| 70 | 1  | 0 | -0.818272 | 4.604513  | 3.307560  |
| 71 | 1  | 0 | -1.878647 | 6.273842  | 1.799675  |
| 72 | 7  | 0 | 1.348942  | 1.215782  | 0.349469  |
| 73 | 1  | 0 | 1.682417  | 1.582048  | 1.230284  |
| 74 | 8  | 0 | -0.023122 | 1.480040  | -1.449324 |
| 75 | 1  | 0 | 1.955539  | 0.463053  | -1.978147 |

-----  
Zero-point correction= 0.620606 (Hartree/Particle)  
Thermal correction to Energy= 0.660731  
Thermal correction to Enthalpy= 0.661676  
Thermal correction to Gibbs Free Energy= 0.537804  
Sum of electronic and zero-point Energies= -2250.501427  
Sum of electronic and thermal Energies= -2250.461301  
Sum of electronic and thermal Enthalpies= -2250.460357  
Sum of electronic and thermal Free Energies= -2250.584228  
M06-2X /6-311++G (d, p)/SMD// B3LYP /6-31G(d) energy=-2250.930379

### INT7b

| Center<br>Number | Atomic<br>Number | Atomic<br>Type | Coordinates (Angstroms) |           |           |
|------------------|------------------|----------------|-------------------------|-----------|-----------|
|                  |                  |                | X                       | Y         | Z         |
| 1                | 8                | 0              | -4.798139               | 0.631838  | 0.855059  |
| 2                | 8                | 0              | -3.638374               | -1.135487 | 0.024523  |
| 3                | 6                | 0              | -4.693445               | -0.588513 | 0.334400  |
| 4                | 6                | 0              | -6.023824               | -1.245056 | 0.163582  |
| 5                | 7                | 0              | 3.164640                | -1.881780 | -0.723340 |
| 6                | 6                | 0              | -6.063440               | -2.552536 | -0.340506 |
| 7                | 6                | 0              | -7.222032               | -0.592517 | 0.489659  |
| 8                | 6                | 0              | 1.947059                | -1.277266 | -0.555037 |
| 9                | 6                | 0              | 4.322573                | -1.352476 | -1.435225 |
| 10               | 6                | 0              | -7.282818               | -3.200658 | -0.517509 |
| 11               | 1                | 0              | -5.130620               | -3.048575 | -0.586828 |

|    |    |   |           |           |           |
|----|----|---|-----------|-----------|-----------|
| 12 | 6  | 0 | -8.440878 | -1.243421 | 0.310369  |
| 13 | 1  | 0 | -7.190534 | 0.418370  | 0.879176  |
| 14 | 8  | 0 | 1.026345  | -1.949330 | -0.027176 |
| 15 | 8  | 0 | 3.489166  | 1.189830  | 1.305590  |
| 16 | 1  | 0 | 4.352535  | -1.744944 | -2.462908 |
| 17 | 1  | 0 | 4.173625  | -0.272696 | -1.505088 |
| 18 | 6  | 0 | 5.622298  | -1.686598 | -0.729555 |
| 19 | 6  | 0 | -8.473749 | -2.546153 | -0.192693 |
| 20 | 1  | 0 | -7.306378 | -4.214326 | -0.907592 |
| 21 | 1  | 0 | -9.366335 | -0.733886 | 0.563249  |
| 22 | 6  | 0 | 2.792280  | 1.204167  | 2.558908  |
| 23 | 6  | 0 | 6.503072  | -2.631214 | -1.267115 |
| 24 | 6  | 0 | 5.952798  | -1.058873 | 0.481181  |
| 25 | 1  | 0 | -9.425963 | -3.051022 | -0.331056 |
| 26 | 6  | 0 | 2.492285  | -0.234823 | 3.012869  |
| 27 | 6  | 0 | 1.487916  | 2.008472  | 2.423222  |
| 28 | 6  | 0 | 3.745603  | 1.892299  | 3.541124  |
| 29 | 6  | 0 | 7.695737  | -2.950847 | -0.612738 |
| 30 | 1  | 0 | 6.255884  | -3.118038 | -2.208864 |
| 31 | 6  | 0 | 7.143409  | -1.377080 | 1.133410  |
| 32 | 1  | 0 | 5.275534  | -0.316003 | 0.898206  |
| 33 | 1  | 0 | 1.994354  | -0.246541 | 3.990978  |
| 34 | 1  | 0 | 1.842216  | -0.745500 | 2.292942  |
| 35 | 1  | 0 | 3.422615  | -0.807396 | 3.095319  |
| 36 | 1  | 0 | 0.823086  | 1.537429  | 1.689694  |
| 37 | 1  | 0 | 0.956505  | 2.066097  | 3.381677  |
| 38 | 1  | 0 | 1.700559  | 3.027063  | 2.081715  |
| 39 | 1  | 0 | 3.301878  | 1.959560  | 4.541031  |
| 40 | 1  | 0 | 4.683605  | 1.331329  | 3.615346  |
| 41 | 1  | 0 | 3.981648  | 2.904025  | 3.194155  |
| 42 | 6  | 0 | 8.017454  | -2.324033 | 0.590735  |
| 43 | 1  | 0 | 8.370502  | -3.686008 | -1.044353 |
| 44 | 1  | 0 | 7.394466  | -0.879670 | 2.067133  |
| 45 | 1  | 0 | 8.945332  | -2.567779 | 1.102200  |
| 46 | 6  | 0 | -3.635308 | 1.520928  | 1.124852  |
| 47 | 6  | 0 | -4.313103 | 2.764820  | 1.704316  |
| 48 | 1  | 0 | -4.991876 | 3.214089  | 0.972269  |
| 49 | 1  | 0 | -4.886270 | 2.513200  | 2.602486  |
| 50 | 1  | 0 | -3.555450 | 3.507543  | 1.973238  |
| 51 | 6  | 0 | -2.720235 | 0.869477  | 2.163944  |
| 52 | 1  | 0 | -3.280659 | 0.629048  | 3.074014  |
| 53 | 1  | 0 | -2.262273 | -0.044329 | 1.782237  |
| 54 | 1  | 0 | -1.918930 | 1.566739  | 2.429685  |
| 55 | 6  | 0 | -2.917229 | 1.858683  | -0.183209 |
| 56 | 1  | 0 | -2.358412 | 1.017023  | -0.594681 |
| 57 | 1  | 0 | -3.637598 | 2.204830  | -0.932418 |
| 58 | 1  | 0 | -2.203638 | 2.669644  | -0.006029 |
| 59 | 19 | 0 | -1.334051 | -1.999089 | -0.882536 |
| 60 | 6  | 0 | 0.841889  | 0.566387  | -1.527845 |
| 61 | 6  | 0 | 0.882397  | 2.056903  | -1.786350 |
| 62 | 6  | 0 | -0.119445 | 2.616663  | -2.592928 |
| 63 | 6  | 0 | 1.878295  | 2.897738  | -1.267385 |
| 64 | 6  | 0 | -0.133423 | 3.982365  | -2.872431 |
| 65 | 1  | 0 | -0.877211 | 1.954482  | -2.997930 |
| 66 | 6  | 0 | 1.859705  | 4.265946  | -1.541247 |
| 67 | 1  | 0 | 2.658633  | 2.487194  | -0.637649 |
| 68 | 6  | 0 | 0.857288  | 4.813557  | -2.344718 |
| 69 | 1  | 0 | -0.914207 | 4.398191  | -3.505142 |
| 70 | 1  | 0 | 2.635789  | 4.905348  | -1.127735 |
| 71 | 1  | 0 | 0.850315  | 5.879234  | -2.560881 |
| 72 | 7  | 0 | 1.908939  | 0.055245  | -0.897908 |
| 73 | 1  | 0 | 2.903169  | 0.813800  | 0.607229  |
| 74 | 8  | 0 | -0.155052 | -0.069663 | -1.972693 |
| 75 | 1  | 0 | 3.205686  | -2.834636 | -0.386826 |

-----  
Zero-point correction= 0.620655 (Hartree/Particle)  
Thermal correction to Energy= 0.661765

Thermal correction to Enthalpy= 0.662709  
 Thermal correction to Gibbs Free Energy= 0.537358  
 Sum of electronic and zero-point Energies= -2250.548314  
 Sum of electronic and thermal Energies= -2250.507204  
 Sum of electronic and thermal Enthalpies= -2250.506260  
 Sum of electronic and thermal Free Energies= -2250.631611  
 M06-2X /6-311++G (d, p)/SMD// B3LYP /6-31G(d) energy=-2250.970043

**INT8b**

| Center Number | Atomic Number | Atomic Type | Coordinates (Angstroms) |           |           |
|---------------|---------------|-------------|-------------------------|-----------|-----------|
|               |               |             | X                       | Y         | Z         |
| 1             | 8             | 0           | -2.918891               | 0.167085  | 0.234208  |
| 2             | 8             | 0           | -1.065965               | -0.991633 | -0.361438 |
| 3             | 6             | 0           | -1.624277               | 0.073024  | -0.105352 |
| 4             | 6             | 0           | -0.953918               | 1.400494  | -0.141992 |
| 5             | 6             | 0           | 0.450182                | 1.467355  | -0.175617 |
| 6             | 6             | 0           | -1.714828               | 2.583268  | -0.159242 |
| 7             | 6             | 0           | 1.069547                | 2.716590  | -0.231492 |
| 8             | 1             | 0           | 1.092121                | 0.581395  | -0.127034 |
| 9             | 6             | 0           | -1.082757               | 3.820877  | -0.224417 |
| 10            | 1             | 0           | -2.796770               | 2.523202  | -0.128115 |
| 11            | 8             | 0           | 2.753903                | -0.810984 | -0.155332 |
| 12            | 6             | 0           | 0.313024                | 3.888881  | -0.261119 |
| 13            | 1             | 0           | 2.154529                | 2.762231  | -0.249094 |
| 14            | 1             | 0           | -1.676368               | 4.730807  | -0.245520 |
| 15            | 6             | 0           | 3.979697                | -0.496135 | 0.381661  |
| 16            | 1             | 0           | 0.807877                | 4.855712  | -0.309030 |
| 17            | 6             | 0           | 3.813206                | 0.131106  | 1.791382  |
| 18            | 6             | 0           | 4.731598                | 0.511982  | -0.527772 |
| 19            | 6             | 0           | 4.855880                | -1.771581 | 0.518362  |
| 20            | 1             | 0           | 4.770763                | 0.382633  | 2.269486  |
| 21            | 1             | 0           | 3.213134                | 1.047134  | 1.724766  |
| 22            | 1             | 0           | 3.276109                | -0.570236 | 2.442778  |
| 23            | 1             | 0           | 4.137048                | 1.427722  | -0.639072 |
| 24            | 1             | 0           | 5.721967                | 0.791853  | -0.141063 |
| 25            | 1             | 0           | 4.861103                | 0.079064  | -1.528070 |
| 26            | 1             | 0           | 5.850941                | -1.577357 | 0.943639  |
| 27            | 1             | 0           | 4.345716                | -2.499371 | 1.163966  |
| 28            | 1             | 0           | 4.992433                | -2.231683 | -0.469984 |
| 29            | 6             | 0           | -3.816980               | -1.000681 | 0.320874  |
| 30            | 6             | 0           | -5.149107               | -0.362208 | 0.723481  |
| 31            | 1             | 0           | -5.050704               | 0.167307  | 1.676264  |
| 32            | 1             | 0           | -5.481440               | 0.352546  | -0.036265 |
| 33            | 1             | 0           | -5.918111               | -1.133970 | 0.832809  |
| 34            | 6             | 0           | -3.935874               | -1.677722 | -1.048549 |
| 35            | 1             | 0           | -4.228949               | -0.947815 | -1.810840 |
| 36            | 1             | 0           | -2.994214               | -2.140666 | -1.347943 |
| 37            | 1             | 0           | -4.709213               | -2.452754 | -1.006210 |
| 38            | 6             | 0           | -3.325833               | -1.957867 | 1.411770  |
| 39            | 1             | 0           | -2.371652               | -2.413453 | 1.142522  |
| 40            | 1             | 0           | -3.205283               | -1.424241 | 2.360376  |
| 41            | 1             | 0           | -4.065563               | -2.752487 | 1.560139  |
| 42            | 19            | 0           | 1.129725                | -2.233559 | -1.023678 |

Zero-point correction= 0.352855 (Hartree/Particle)  
 Thermal correction to Energy= 0.375958  
 Thermal correction to Enthalpy= 0.376902  
 Thermal correction to Gibbs Free Energy= 0.296402  
 Sum of electronic and zero-point Energies= -1410.737328  
 Sum of electronic and thermal Energies= -1410.714225  
 Sum of electronic and thermal Enthalpies= -1410.713281  
 Sum of electronic and thermal Free Energies= -1410.793782  
 M06-2X /6-311++G (d, p)/SMD// B3LYP /6-31G(d) energy=-1410.990227

**3aa**



| Center Number | Atomic Number | Atomic Type | Coordinates (Angstroms) |           |           | Z |
|---------------|---------------|-------------|-------------------------|-----------|-----------|---|
|               |               |             | X                       | Y         |           |   |
| 1             | 7             | 0           | 1.983504                | 2.249985  | 0.096512  |   |
| 2             | 6             | 0           | 0.640938                | 2.548990  | -0.118465 |   |
| 3             | 6             | 0           | 2.485584                | 1.201629  | 0.983156  |   |
| 4             | 8             | 0           | 0.271991                | 3.658719  | -0.439852 |   |
| 5             | 1             | 0           | 3.501164                | 1.501562  | 1.267556  |   |
| 6             | 1             | 0           | 1.903567                | 1.162422  | 1.914661  |   |
| 7             | 6             | 0           | 2.537979                | -0.190572 | 0.365387  |   |
| 8             | 6             | 0           | 2.419178                | -1.318692 | 1.189173  |   |
| 9             | 6             | 0           | 2.745239                | -0.374498 | -1.007470 |   |
| 10            | 6             | 0           | 2.517971                | -2.604543 | 0.654999  |   |
| 11            | 1             | 0           | 2.253794                | -1.188501 | 2.257019  |   |
| 12            | 6             | 0           | 2.837205                | -1.660362 | -1.543550 |   |
| 13            | 1             | 0           | 2.824470                | 0.496531  | -1.651513 |   |
| 14            | 6             | 0           | 2.726928                | -2.778222 | -0.714767 |   |
| 15            | 1             | 0           | 2.426065                | -3.468803 | 1.307407  |   |
| 16            | 1             | 0           | 2.994788                | -1.787664 | -2.611167 |   |
| 17            | 1             | 0           | 2.797889                | -3.778173 | -1.133708 |   |
| 18            | 6             | 0           | -1.596073               | 1.441651  | 0.033693  |   |
| 19            | 6             | 0           | -2.247882               | 0.082062  | 0.050510  |   |
| 20            | 6             | 0           | -3.604965               | 0.038799  | -0.300838 |   |
| 21            | 6             | 0           | -1.599396               | -1.108385 | 0.410888  |   |
| 22            | 6             | 0           | -4.294433               | -1.170349 | -0.314348 |   |
| 23            | 1             | 0           | -4.096620               | 0.970688  | -0.558946 |   |
| 24            | 6             | 0           | -2.293810               | -2.318495 | 0.404363  |   |
| 25            | 1             | 0           | -0.559816               | -1.112571 | 0.727617  |   |
| 26            | 6             | 0           | -3.639479               | -2.353619 | 0.036787  |   |
| 27            | 1             | 0           | -5.343411               | -1.191046 | -0.596867 |   |
| 28            | 1             | 0           | -1.781516               | -3.232668 | 0.691343  |   |
| 29            | 1             | 0           | -4.177086               | -3.298042 | 0.029242  |   |
| 30            | 7             | 0           | -0.196257               | 1.424592  | 0.031070  |   |
| 31            | 1             | 0           | 0.253979                | 0.521968  | -0.049291 |   |
| 32            | 8             | 0           | -2.253939               | 2.463221  | 0.026910  |   |
| 33            | 1             | 0           | 2.537681                | 3.094376  | 0.039996  |   |

Zero-point correction= 0.265265 (Hartree/Particle)  
 Thermal correction to Energy= 0.281558  
 Thermal correction to Enthalpy= 0.282502  
 Thermal correction to Gibbs Free Energy= 0.218213  
 Sum of electronic and zero-point Energies= -839.741889  
 Sum of electronic and thermal Energies= -839.725595  
 Sum of electronic and thermal Enthalpies= -839.724651  
 Sum of electronic and thermal Free Energies= -839.788940  
 M06-2X /6-311++G (d, p)/SMD// B3LYP /6-31G(d) energy=-839.915187

**TS1b**

| Center Number | Atomic Number | Atomic Type | Coordinates (Angstroms) |           |           | Z |
|---------------|---------------|-------------|-------------------------|-----------|-----------|---|
|               |               |             | X                       | Y         |           |   |
| 1             | 8             | 0           | -2.279036               | -2.071346 | 0.348711  |   |
| 2             | 8             | 0           | -0.563089               | -0.815589 | -1.362981 |   |
| 3             | 6             | 0           | -1.549774               | -0.239294 | -0.886321 |   |
| 4             | 6             | 0           | -2.828084               | -0.184897 | -1.665611 |   |
| 5             | 7             | 0           | -1.369748               | 0.724025  | 0.174648  |   |
| 6             | 6             | 0           | -2.753585               | -0.499338 | -3.029310 |   |
| 7             | 6             | 0           | -4.069069               | 0.183955  | -1.124815 |   |
| 8             | 6             | 0           | -0.466338               | 0.455579  | 1.197422  |   |
| 9             | 6             | 0           | -1.856741               | 2.112671  | 0.008058  |   |
| 10            | 6             | 0           | -3.891907               | -0.450081 | -3.834457 |   |
| 11            | 1             | 0           | -1.793594               | -0.787166 | -3.444184 |   |
| 12            | 6             | 0           | -5.202798               | 0.241577  | -1.929267 |   |
| 13            | 1             | 0           | -4.147355               | 0.394257  | -0.064493 |   |
| 14            | 8             | 0           | 0.216223                | -0.550467 | 1.306043  |   |

|    |    |   |           |           |           |
|----|----|---|-----------|-----------|-----------|
| 15 | 8  | 0 | -0.459291 | 1.479246  | 2.076387  |
| 16 | 1  | 0 | -2.637945 | 2.084887  | -0.751298 |
| 17 | 1  | 0 | -2.318086 | 2.447535  | 0.938783  |
| 18 | 6  | 0 | -0.778137 | 3.092411  | -0.427546 |
| 19 | 6  | 0 | -5.119490 | -0.075834 | -3.289154 |
| 20 | 1  | 0 | -3.816488 | -0.700416 | -4.889457 |
| 21 | 1  | 0 | -6.158142 | 0.520013  | -1.492395 |
| 22 | 6  | 0 | 0.482476  | 1.520929  | 3.210706  |
| 23 | 6  | 0 | -0.664234 | 4.339353  | 0.196290  |
| 24 | 6  | 0 | 0.080374  | 2.792781  | -1.494835 |
| 25 | 1  | 0 | -6.007358 | -0.033707 | -3.914513 |
| 26 | 6  | 0 | 1.924195  | 1.533845  | 2.691566  |
| 27 | 6  | 0 | 0.213640  | 0.359326  | 4.172482  |
| 28 | 6  | 0 | 0.136742  | 2.858169  | 3.872019  |
| 29 | 6  | 0 | 0.285635  | 5.269751  | -0.231285 |
| 30 | 1  | 0 | -1.324053 | 4.582451  | 1.025999  |
| 31 | 6  | 0 | 1.032847  | 3.719187  | -1.921461 |
| 32 | 1  | 0 | 0.001376  | 1.830928  | -1.994359 |
| 33 | 1  | 0 | 2.612670  | 1.680613  | 3.531356  |
| 34 | 1  | 0 | 2.175725  | 0.595385  | 2.194597  |
| 35 | 1  | 0 | 2.065525  | 2.360332  | 1.986708  |
| 36 | 1  | 0 | 0.467847  | -0.599084 | 3.718618  |
| 37 | 1  | 0 | 0.814506  | 0.492149  | 5.079529  |
| 38 | 1  | 0 | -0.842119 | 0.342016  | 4.462823  |
| 39 | 1  | 0 | 0.779325  | 3.021983  | 4.743388  |
| 40 | 1  | 0 | 0.284195  | 3.684354  | 3.169505  |
| 41 | 1  | 0 | -0.906224 | 2.865993  | 4.205243  |
| 42 | 6  | 0 | 1.139564  | 4.961147  | -1.290710 |
| 43 | 1  | 0 | 0.360130  | 6.233028  | 0.266743  |
| 44 | 1  | 0 | 1.685014  | 3.475577  | -2.756803 |
| 45 | 1  | 0 | 1.879965  | 5.682992  | -1.624942 |
| 46 | 6  | 0 | -3.172875 | -2.422671 | 1.344238  |
| 47 | 6  | 0 | -3.422447 | -1.268411 | 2.351473  |
| 48 | 1  | 0 | -2.472986 | -0.953374 | 2.800420  |
| 49 | 1  | 0 | -3.860124 | -0.397726 | 1.850639  |
| 50 | 1  | 0 | -4.103400 | -1.562518 | 3.161700  |
| 51 | 6  | 0 | -4.529880 | -2.879269 | 0.747044  |
| 52 | 1  | 0 | -4.988135 | -2.067797 | 0.172914  |
| 53 | 1  | 0 | -4.360486 | -3.714565 | 0.056571  |
| 54 | 1  | 0 | -5.245977 | -3.204196 | 1.515569  |
| 55 | 6  | 0 | -2.589031 | -3.616953 | 2.156948  |
| 56 | 1  | 0 | -2.408655 | -4.469442 | 1.486637  |
| 57 | 1  | 0 | -1.635973 | -3.325152 | 2.621612  |
| 58 | 1  | 0 | -3.256669 | -3.961861 | 2.958858  |
| 59 | 19 | 0 | 0.039817  | -2.959403 | 0.095535  |
| 60 | 6  | 0 | 3.104276  | -1.475690 | -0.928519 |
| 61 | 6  | 0 | 4.595952  | -1.296292 | -0.917052 |
| 62 | 6  | 0 | 5.360195  | -2.220706 | -0.193004 |
| 63 | 6  | 0 | 5.245902  | -0.265097 | -1.610119 |
| 64 | 6  | 0 | 6.747002  | -2.101969 | -0.140307 |
| 65 | 1  | 0 | 4.845598  | -3.025854 | 0.320830  |
| 66 | 6  | 0 | 6.635154  | -0.151687 | -1.564560 |
| 67 | 1  | 0 | 4.675126  | 0.432196  | -2.217470 |
| 68 | 6  | 0 | 7.387463  | -1.065737 | -0.824491 |
| 69 | 1  | 0 | 7.330028  | -2.819183 | 0.431041  |
| 70 | 1  | 0 | 7.129985  | 0.645000  | -2.113260 |
| 71 | 1  | 0 | 8.469792  | -0.975394 | -0.787554 |
| 72 | 7  | 0 | 2.354557  | -0.394339 | -1.250704 |
| 73 | 1  | 0 | 2.754186  | 0.531810  | -1.228930 |
| 74 | 8  | 0 | 2.598338  | -2.576454 | -0.665995 |
| 75 | 1  | 0 | 1.335270  | -0.468858 | -1.193056 |

-----  
Zero-point correction= 0.619157 (Hartree/Particle)  
Thermal correction to Energy= 0.658931  
Thermal correction to Enthalpy= 0.659875  
Thermal correction to Gibbs Free Energy= 0.542402  
Sum of electronic and zero-point Energies= -2250.498774

Sum of electronic and thermal Energies= -2250.459000  
 Sum of electronic and thermal Enthalpies= -2250.458056  
 Sum of electronic and thermal Free Energies= -2250.575529  
 M06-2X /6-311++G (d, p)/SMD// B3LYP /6-31G(d) energy=-2250.925645

**TS2b**

| Center<br>Number | Atomic<br>Number | Atomic<br>Type | Coordinates (Angstroms) |           |           |
|------------------|------------------|----------------|-------------------------|-----------|-----------|
|                  |                  |                | X                       | Y         | Z         |
| 1                | 8                | 0              | 2.419407                | 0.149478  | -1.657410 |
| 2                | 8                | 0              | 0.689853                | -1.098776 | -1.148223 |
| 3                | 6                | 0              | 1.813827                | -0.726371 | -0.730038 |
| 4                | 6                | 0              | 2.713205                | -1.785847 | -0.097441 |
| 5                | 7                | 0              | 1.411551                | 0.453706  | 0.838024  |
| 6                | 6                | 0              | 2.506368                | -3.097525 | -0.548067 |
| 7                | 6                | 0              | 3.717359                | -1.560157 | 0.851876  |
| 8                | 6                | 0              | 0.956985                | 1.689870  | 0.619573  |
| 9                | 6                | 0              | 1.175515                | -0.169469 | 2.146816  |
| 10               | 6                | 0              | 3.296913                | -4.149236 | -0.082955 |
| 11               | 1                | 0              | 1.712620                | -3.275509 | -1.265290 |
| 12               | 6                | 0              | 4.503675                | -2.611176 | 1.326222  |
| 13               | 1                | 0              | 3.868499                | -0.561447 | 1.242011  |
| 14               | 8                | 0              | 0.918162                | 2.278451  | -0.483323 |
| 15               | 8                | 0              | 0.518626                | 2.341315  | 1.763950  |
| 16               | 1                | 0              | 1.954259                | -0.917015 | 2.308124  |
| 17               | 1                | 0              | 1.286404                | 0.580388  | 2.936345  |
| 18               | 6                | 0              | -0.168702               | -0.873279 | 2.319085  |
| 19               | 6                | 0              | 4.301683                | -3.910023 | 0.855481  |
| 20               | 1                | 0              | 3.123657                | -5.156902 | -0.452402 |
| 21               | 1                | 0              | 5.271189                | -2.413302 | 2.070141  |
| 22               | 6                | 0              | 0.126567                | 3.746617  | 1.758843  |
| 23               | 6                | 0              | -1.325198               | -0.166910 | 2.683507  |
| 24               | 6                | 0              | -0.265412               | -2.263152 | 2.161819  |
| 25               | 1                | 0              | 4.915809                | -4.727688 | 1.223724  |
| 26               | 6                | 0              | -1.130853               | 3.963359  | 0.905806  |
| 27               | 6                | 0              | 1.289582                | 4.637506  | 1.302171  |
| 28               | 6                | 0              | -0.187227               | 4.013905  | 3.236631  |
| 29               | 6                | 0              | -2.538688               | -0.827091 | 2.883282  |
| 30               | 1                | 0              | -1.262986               | 0.908086  | 2.816221  |
| 31               | 6                | 0              | -1.476126               | -2.930687 | 2.363013  |
| 32               | 1                | 0              | 0.618800                | -2.829058 | 1.881227  |
| 33               | 1                | 0              | -1.503620               | 4.985739  | 1.041857  |
| 34               | 1                | 0              | -0.914053               | 3.803552  | -0.150895 |
| 35               | 1                | 0              | -1.921650               | 3.269705  | 1.212948  |
| 36               | 1                | 0              | 1.524204                | 4.461216  | 0.251845  |
| 37               | 1                | 0              | 1.026144                | 5.693266  | 1.437806  |
| 38               | 1                | 0              | 2.181882                | 4.430517  | 1.903892  |
| 39               | 1                | 0              | -0.478671               | 5.060074  | 3.381251  |
| 40               | 1                | 0              | -1.008980               | 3.377701  | 3.582756  |
| 41               | 1                | 0              | 0.689870                | 3.808539  | 3.859034  |
| 42               | 6                | 0              | -2.620254               | -2.214386 | 2.726170  |
| 43               | 1                | 0              | -3.420451               | -0.260667 | 3.173281  |
| 44               | 1                | 0              | -1.523071               | -4.010671 | 2.244547  |
| 45               | 1                | 0              | -3.560719               | -2.731724 | 2.900194  |
| 46               | 6                | 0              | 3.761477                | 0.705063  | -1.816308 |
| 47               | 6                | 0              | 4.198235                | 1.591488  | -0.644294 |
| 48               | 1                | 0              | 3.424584                | 2.330855  | -0.428750 |
| 49               | 1                | 0              | 4.400279                | 1.020150  | 0.261190  |
| 50               | 1                | 0              | 5.122660                | 2.114204  | -0.918447 |
| 51               | 6                | 0              | 4.790434                | -0.388306 | -2.140958 |
| 52               | 1                | 0              | 5.021436                | -1.015935 | -1.279483 |
| 53               | 1                | 0              | 4.419588                | -1.031735 | -2.946240 |
| 54               | 1                | 0              | 5.723645                | 0.078521  | -2.477882 |
| 55               | 6                | 0              | 3.574271                | 1.598767  | -3.056203 |
| 56               | 1                | 0              | 3.226320                | 1.004878  | -3.909784 |
| 57               | 1                | 0              | 2.846738                | 2.389530  | -2.842394 |

|    |    |   |           |           |           |
|----|----|---|-----------|-----------|-----------|
| 58 | 1  | 0 | 4.520388  | 2.073993  | -3.336869 |
| 59 | 19 | 0 | 0.012620  | 1.035982  | -2.570826 |
| 60 | 6  | 0 | -2.916325 | -0.564858 | -1.496469 |
| 61 | 6  | 0 | -4.402168 | -0.624655 | -1.273373 |
| 62 | 6  | 0 | -5.185059 | 0.416175  | -1.789657 |
| 63 | 6  | 0 | -5.029978 | -1.679558 | -0.595863 |
| 64 | 6  | 0 | -6.566767 | 0.416406  | -1.612602 |
| 65 | 1  | 0 | -4.688446 | 1.216062  | -2.328675 |
| 66 | 6  | 0 | -6.414250 | -1.683454 | -0.425788 |
| 67 | 1  | 0 | -4.445617 | -2.515422 | -0.222648 |
| 68 | 6  | 0 | -7.184719 | -0.633333 | -0.928599 |
| 69 | 1  | 0 | -7.163257 | 1.233104  | -2.010411 |
| 70 | 1  | 0 | -6.891523 | -2.510446 | 0.093058  |
| 71 | 1  | 0 | -8.263141 | -0.636503 | -0.793706 |
| 72 | 7  | 0 | -2.140750 | -1.321756 | -0.696518 |
| 73 | 1  | 0 | -2.499935 | -1.695758 | 0.171614  |
| 74 | 8  | 0 | -2.450409 | 0.154223  | -2.400381 |
| 75 | 1  | 0 | -1.119578 | -1.273235 | -0.781013 |

-----  
Zero-point correction= 0.620798 (Hartree/Particle)  
Thermal correction to Energy= 0.659898  
Thermal correction to Enthalpy= 0.660842  
Thermal correction to Gibbs Free Energy= 0.546187  
Sum of electronic and zero-point Energies= -2250.499230  
Sum of electronic and thermal Energies= -2250.460131  
Sum of electronic and thermal Enthalpies= -2250.459187  
Sum of electronic and thermal Free Energies= -2250.573842  
M06-2X /6-311++G (d, p)/SMD// B3LYP /6-31G(d) energy=-2250.929742

### TS3b

| Center<br>Number | Atomic<br>Number | Atomic<br>Type | Coordinates (Angstroms) |           |           | Z |
|------------------|------------------|----------------|-------------------------|-----------|-----------|---|
|                  |                  |                | X                       | Y         |           |   |
| 1                | 8                | 0              | 5.359874                | -1.494073 | 0.426088  |   |
| 2                | 8                | 0              | 3.139032                | -1.124584 | 0.154232  |   |
| 3                | 6                | 0              | 4.308019                | -0.784951 | -0.002710 |   |
| 4                | 6                | 0              | 4.717859                | 0.468187  | -0.697635 |   |
| 5                | 7                | 0              | -2.541157               | -0.735688 | -0.669603 |   |
| 6                | 6                | 0              | 3.723677                | 1.376275  | -1.094207 |   |
| 7                | 6                | 0              | 6.066707                | 0.750269  | -0.968298 |   |
| 8                | 6                | 0              | -2.514509               | -1.998259 | -0.236057 |   |
| 9                | 6                | 0              | -3.634590               | -0.213096 | -1.486989 |   |
| 10               | 6                | 0              | 4.079560                | 2.548560  | -1.758561 |   |
| 11               | 1                | 0              | 2.677378                | 1.187264  | -0.877779 |   |
| 12               | 6                | 0              | 6.413996                | 1.923084  | -1.634162 |   |
| 13               | 1                | 0              | 6.832459                | 0.048571  | -0.658353 |   |
| 14               | 8                | 0              | -1.576805               | -2.480500 | 0.438070  |   |
| 15               | 8                | 0              | -3.602118               | -2.759092 | -0.597441 |   |
| 16               | 1                | 0              | -3.196757               | 0.440945  | -2.252459 |   |
| 17               | 1                | 0              | -4.141651               | -1.030106 | -2.010538 |   |
| 18               | 6                | 0              | -4.652456               | 0.596079  | -0.693233 |   |
| 19               | 6                | 0              | 5.421525                | 2.823224  | -2.031348 |   |
| 20               | 1                | 0              | 3.301347                | 3.243382  | -2.060885 |   |
| 21               | 1                | 0              | 7.458718                | 2.134920  | -1.844297 |   |
| 22               | 6                | 0              | -3.660987               | -4.198111 | -0.350240 |   |
| 23               | 6                | 0              | -5.409469               | -0.002541 | 0.324962  |   |
| 24               | 6                | 0              | -4.847211               | 1.957566  | -0.954405 |   |
| 25               | 1                | 0              | 5.695061                | 3.737366  | -2.551797 |   |
| 26               | 6                | 0              | -3.675342               | -4.486408 | 1.156156  |   |
| 27               | 6                | 0              | -2.505651               | -4.914317 | -1.062006 |   |
| 28               | 6                | 0              | -4.999872               | -4.594222 | -0.982907 |   |
| 29               | 6                | 0              | -6.335158               | 0.740346  | 1.056704  |   |
| 30               | 1                | 0              | -5.267675               | -1.058792 | 0.535272  |   |
| 31               | 6                | 0              | -5.774968               | 2.706277  | -0.223948 |   |
| 32               | 1                | 0              | -4.265454               | 2.437173  | -1.739175 |   |
| 33               | 1                | 0              | -3.825284               | -5.558776 | 1.329347  |   |

|    |    |   |           |           |           |
|----|----|---|-----------|-----------|-----------|
| 34 | 1  | 0 | -2.736877 | -4.175170 | 1.616137  |
| 35 | 1  | 0 | -4.499606 | -3.947132 | 1.636679  |
| 36 | 1  | 0 | -1.547332 | -4.633662 | -0.622429 |
| 37 | 1  | 0 | -2.631123 | -6.000126 | -0.976982 |
| 38 | 1  | 0 | -2.499156 | -4.655665 | -2.127185 |
| 39 | 1  | 0 | -5.174151 | -5.669224 | -0.863510 |
| 40 | 1  | 0 | -5.825404 | -4.054748 | -0.507024 |
| 41 | 1  | 0 | -5.007368 | -4.357785 | -2.052142 |
| 42 | 6  | 0 | -6.521590 | 2.099076  | 0.785837  |
| 43 | 1  | 0 | -6.916035 | 0.258285  | 1.839530  |
| 44 | 1  | 0 | -5.912646 | 3.761899  | -0.445935 |
| 45 | 1  | 0 | -7.244045 | 2.677062  | 1.356541  |
| 46 | 6  | 0 | 5.228503  | -2.785689 | 1.134767  |
| 47 | 6  | 0 | 6.687924  | -3.165023 | 1.398483  |
| 48 | 1  | 0 | 7.239560  | -3.262504 | 0.457941  |
| 49 | 1  | 0 | 7.180887  | -2.404124 | 2.011908  |
| 50 | 1  | 0 | 6.735960  | -4.121769 | 1.928708  |
| 51 | 6  | 0 | 4.475835  | -2.584657 | 2.453674  |
| 52 | 1  | 0 | 4.950256  | -1.795618 | 3.046840  |
| 53 | 1  | 0 | 3.431798  | -2.317584 | 2.283422  |
| 54 | 1  | 0 | 4.508020  | -3.512365 | 3.035469  |
| 55 | 6  | 0 | 4.557827  | -3.816744 | 0.221988  |
| 56 | 1  | 0 | 3.517485  | -3.556648 | 0.020223  |
| 57 | 1  | 0 | 5.095081  | -3.891546 | -0.729542 |
| 58 | 1  | 0 | 4.583179  | -4.800031 | 0.704337  |
| 59 | 19 | 0 | 0.488081  | -0.978233 | -0.056603 |
| 60 | 6  | 0 | -0.464599 | 2.004088  | 0.096614  |
| 61 | 6  | 0 | -0.425784 | 3.457382  | 0.507006  |
| 62 | 6  | 0 | 0.809842  | 4.117696  | 0.533647  |
| 63 | 6  | 0 | -1.585247 | 4.173972  | 0.835143  |
| 64 | 6  | 0 | 0.890325  | 5.457644  | 0.907604  |
| 65 | 1  | 0 | 1.701463  | 3.562290  | 0.261056  |
| 66 | 6  | 0 | -1.507510 | 5.520316  | 1.193739  |
| 67 | 1  | 0 | -2.557167 | 3.689901  | 0.779253  |
| 68 | 6  | 0 | -0.269328 | 6.163380  | 1.238352  |
| 69 | 1  | 0 | 1.856902  | 5.954392  | 0.938106  |
| 70 | 1  | 0 | -2.415249 | 6.067770  | 1.434110  |
| 71 | 1  | 0 | -0.208707 | 7.210533  | 1.523614  |
| 72 | 7  | 0 | -1.419938 | 1.210874  | 0.600988  |
| 73 | 1  | 0 | -2.055407 | 1.661932  | 1.250676  |
| 74 | 8  | 0 | 0.422160  | 1.574425  | -0.685764 |
| 75 | 1  | 0 | -1.905469 | 0.224002  | -0.002648 |

-----  
Zero-point correction= 0.615522 (Hartree/Particle)  
Thermal correction to Energy= 0.656206  
Thermal correction to Enthalpy= 0.657150  
Thermal correction to Gibbs Free Energy= 0.531586  
Sum of electronic and zero-point Energies= -2250.547853  
Sum of electronic and thermal Energies= -2250.507170  
Sum of electronic and thermal Enthalpies= -2250.506226  
Sum of electronic and thermal Free Energies= -2250.631790  
M06-2X /6-311++G (d, p)/SMD// B3LYP /6-31G(d) energy=-2250.957096

#### TS4b

| Center Number | Atomic Number | Atomic Type | Coordinates (Angstroms) |           |           |
|---------------|---------------|-------------|-------------------------|-----------|-----------|
|               |               |             | X                       | Y         | Z         |
| 1             | 8             | 0           | -4.148091               | -1.172736 | 1.285261  |
| 2             | 8             | 0           | -2.865426               | -1.712382 | -0.508470 |
| 3             | 6             | 0           | -3.937947               | -1.378903 | -0.012874 |
| 4             | 6             | 0           | -5.172511               | -1.164048 | -0.825779 |
| 5             | 7             | 0           | 2.644614                | -0.085856 | -1.409864 |
| 6             | 6             | 0           | -5.122840               | -1.438106 | -2.199708 |
| 7             | 6             | 0           | -6.366272               | -0.697649 | -0.255931 |
| 8             | 6             | 0           | 2.120251                | -0.237714 | -0.057099 |
| 9             | 6             | 0           | 3.836399                | 0.749218  | -1.591958 |

|    |    |   |           |           |           |
|----|----|---|-----------|-----------|-----------|
| 10 | 6  | 0 | -6.249393 | -1.247842 | -2.995318 |
| 11 | 1  | 0 | -4.196536 | -1.805714 | -2.628523 |
| 12 | 6  | 0 | -7.491113 | -0.504922 | -1.055351 |
| 13 | 1  | 0 | -6.403777 | -0.486857 | 0.806470  |
| 14 | 8  | 0 | 1.210194  | -1.103166 | 0.104353  |
| 15 | 8  | 0 | 3.196118  | -0.138159 | 0.833709  |
| 16 | 1  | 0 | 3.781485  | 1.147300  | -2.615651 |
| 17 | 1  | 0 | 3.837188  | 1.621404  | -0.921760 |
| 18 | 6  | 0 | 5.152883  | 0.003803  | -1.450820 |
| 19 | 6  | 0 | -7.435150 | -0.779232 | -2.423868 |
| 20 | 1  | 0 | -6.204646 | -1.463995 | -4.059065 |
| 21 | 1  | 0 | -8.412588 | -0.140210 | -0.610422 |
| 22 | 6  | 0 | 3.294362  | -0.967017 | 2.020191  |
| 23 | 6  | 0 | 6.302308  | 0.684364  | -1.032279 |
| 24 | 6  | 0 | 5.266015  | -1.348992 | -1.792430 |
| 25 | 1  | 0 | -8.314377 | -0.628622 | -3.044405 |
| 26 | 6  | 0 | 3.416450  | -2.450467 | 1.640653  |
| 27 | 6  | 0 | 2.113703  | -0.724233 | 2.972610  |
| 28 | 6  | 0 | 4.599590  | -0.480894 | 2.663707  |
| 29 | 6  | 0 | 7.536157  | 0.034964  | -0.958562 |
| 30 | 1  | 0 | 6.228691  | 1.734157  | -0.754245 |
| 31 | 6  | 0 | 6.496423  | -2.003459 | -1.716695 |
| 32 | 1  | 0 | 4.371592  | -1.881815 | -2.100259 |
| 33 | 1  | 0 | 3.610037  | -3.054473 | 2.536097  |
| 34 | 1  | 0 | 2.499897  | -2.798862 | 1.162531  |
| 35 | 1  | 0 | 4.250048  | -2.588102 | 0.944083  |
| 36 | 1  | 0 | 1.179216  | -1.031727 | 2.501914  |
| 37 | 1  | 0 | 2.257109  | -1.290309 | 3.901481  |
| 38 | 1  | 0 | 2.046432  | 0.339047  | 3.234025  |
| 39 | 1  | 0 | 4.806887  | -1.041814 | 3.582441  |
| 40 | 1  | 0 | 5.438223  | -0.614135 | 1.973501  |
| 41 | 1  | 0 | 4.530705  | 0.583271  | 2.915398  |
| 42 | 6  | 0 | 7.638188  | -1.314466 | -1.301027 |
| 43 | 1  | 0 | 8.415583  | 0.581790  | -0.626463 |
| 44 | 1  | 0 | 6.564188  | -3.056236 | -1.981926 |
| 45 | 1  | 0 | 8.596151  | -1.824950 | -1.240304 |
| 46 | 6  | 0 | -3.096464 | -1.319026 | 2.327326  |
| 47 | 6  | 0 | -3.865208 | -0.956686 | 3.600443  |
| 48 | 1  | 0 | -4.220993 | 0.077829  | 3.557474  |
| 49 | 1  | 0 | -4.728406 | -1.616668 | 3.733724  |
| 50 | 1  | 0 | -3.211235 | -1.060896 | 4.471968  |
| 51 | 6  | 0 | -2.620683 | -2.772881 | 2.370683  |
| 52 | 1  | 0 | -3.466679 | -3.451114 | 2.527190  |
| 53 | 1  | 0 | -2.105952 | -3.051676 | 1.449727  |
| 54 | 1  | 0 | -1.922875 | -2.899302 | 3.205402  |
| 55 | 6  | 0 | -1.955383 | -0.327623 | 2.084126  |
| 56 | 1  | 0 | -1.279758 | -0.636931 | 1.285553  |
| 57 | 1  | 0 | -2.350761 | 0.667977  | 1.856050  |
| 58 | 1  | 0 | -1.357335 | -0.248243 | 2.998612  |
| 59 | 19 | 0 | -0.563943 | -1.225818 | -1.672335 |
| 60 | 6  | 0 | 0.370876  | 1.847162  | -0.488346 |
| 61 | 6  | 0 | -0.338176 | 3.103225  | -0.035915 |
| 62 | 6  | 0 | -1.005809 | 3.875600  | -0.995881 |
| 63 | 6  | 0 | -0.374467 | 3.512419  | 1.304559  |
| 64 | 6  | 0 | -1.671928 | 5.043882  | -0.629911 |
| 65 | 1  | 0 | -0.987986 | 3.538835  | -2.027233 |
| 66 | 6  | 0 | -1.050676 | 4.675400  | 1.674743  |
| 67 | 1  | 0 | 0.108667  | 2.908332  | 2.068178  |
| 68 | 6  | 0 | -1.696324 | 5.447902  | 0.707355  |
| 69 | 1  | 0 | -2.174777 | 5.640028  | -1.387366 |
| 70 | 1  | 0 | -1.076491 | 4.975816  | 2.719188  |
| 71 | 1  | 0 | -2.219225 | 6.356523  | 0.994689  |
| 72 | 7  | 0 | 1.378094  | 1.376122  | 0.228915  |
| 73 | 1  | 0 | 1.679715  | 1.901136  | 1.041187  |
| 74 | 8  | 0 | -0.024121 | 1.294743  | -1.560758 |
| 75 | 1  | 0 | 1.879584  | 0.328820  | -1.940894 |

Zero-point correction= 0.620071 (Hartree/Particle)  
 Thermal correction to Energy= 0.659742  
 Thermal correction to Enthalpy= 0.660686  
 Thermal correction to Gibbs Free Energy= 0.539355  
 Sum of electronic and zero-point Energies= -2250.501053  
 Sum of electronic and thermal Energies= -2250.461382  
 Sum of electronic and thermal Enthalpies= -2250.460438  
 Sum of electronic and thermal Free Energies= -2250.581770  
 M06-2X /6-311++G (d, p)/SMD// B3LYP /6-31G(d) energy=-2250.926226

**TS5b**

| Center<br>Number | Atomic<br>Number | Atomic<br>Type | Coordinates (Angstroms) |           |           |
|------------------|------------------|----------------|-------------------------|-----------|-----------|
|                  |                  |                | X                       | Y         | Z         |
| 1                | 8                | 0              | -4.562131               | 0.381954  | 0.811399  |
| 2                | 8                | 0              | -3.285444               | -0.928023 | -0.534494 |
| 3                | 6                | 0              | -4.342472               | -0.675737 | 0.037770  |
| 4                | 6                | 0              | -5.547546               | -1.552670 | -0.073016 |
| 5                | 7                | 0              | 2.452668                | -1.319107 | -0.829002 |
| 6                | 6                | 0              | -5.472432               | -2.694036 | -0.883233 |
| 7                | 6                | 0              | -6.739265               | -1.266371 | 0.609216  |
| 8                | 6                | 0              | 1.674705                | -0.459935 | -0.063055 |
| 9                | 6                | 0              | 3.746564                | -0.925503 | -1.426258 |
| 10               | 6                | 0              | -6.571520               | -3.538985 | -1.011411 |
| 11               | 1                | 0              | -4.546227               | -2.905199 | -1.407146 |
| 12               | 6                | 0              | -7.837359               | -2.114221 | 0.479931  |
| 13               | 1                | 0              | -6.796311               | -0.384048 | 1.235870  |
| 14               | 8                | 0              | 0.670304                | -0.902949 | 0.521741  |
| 15               | 8                | 0              | 3.191321                | 0.253436  | 1.355953  |
| 16               | 1                | 0              | 3.638848                | -0.881869 | -2.517607 |
| 17               | 1                | 0              | 3.993453                | 0.075277  | -1.070730 |
| 18               | 6                | 0              | 4.853832                | -1.889986 | -1.058466 |
| 19               | 6                | 0              | -7.756006               | -3.250115 | -0.328961 |
| 20               | 1                | 0              | -6.506357               | -4.421765 | -1.641316 |
| 21               | 1                | 0              | -8.757714               | -1.889040 | 1.011286  |
| 22               | 6                | 0              | 2.962117                | 0.251837  | 2.732279  |
| 23               | 6                | 0              | 5.370861                | -2.790119 | -1.996567 |
| 24               | 6                | 0              | 5.366440                | -1.888407 | 0.248020  |
| 25               | 1                | 0              | -8.614126               | -3.909435 | -0.427471 |
| 26               | 6                | 0              | 2.746835                | -1.192819 | 3.245682  |
| 27               | 6                | 0              | 1.717405                | 1.101188  | 3.096992  |
| 28               | 6                | 0              | 4.198769                | 0.861099  | 3.433701  |
| 29               | 6                | 0              | 6.388085                | -3.679981 | -1.641398 |
| 30               | 1                | 0              | 4.981941                | -2.790059 | -3.013446 |
| 31               | 6                | 0              | 6.381081                | -2.777372 | 0.600574  |
| 32               | 1                | 0              | 4.943348                | -1.177619 | 0.956905  |
| 33               | 1                | 0              | 2.585026                | -1.228303 | 4.331937  |
| 34               | 1                | 0              | 1.876228                | -1.637943 | 2.752549  |
| 35               | 1                | 0              | 3.623878                | -1.809383 | 3.013683  |
| 36               | 1                | 0              | 0.833294                | 0.700228  | 2.591087  |
| 37               | 1                | 0              | 1.524564                | 1.115809  | 4.178663  |
| 38               | 1                | 0              | 1.861839                | 2.139891  | 2.769077  |
| 39               | 1                | 0              | 4.077854                | 0.914204  | 4.524833  |
| 40               | 1                | 0              | 5.091608                | 0.262648  | 3.216043  |
| 41               | 1                | 0              | 4.377448                | 1.875385  | 3.056078  |
| 42               | 6                | 0              | 6.894062                | -3.674957 | -0.341144 |
| 43               | 1                | 0              | 6.784638                | -4.372749 | -2.379634 |
| 44               | 1                | 0              | 6.777678                | -2.767652 | 1.612947  |
| 45               | 1                | 0              | 7.686775                | -4.365096 | -0.062788 |
| 46               | 6                | 0              | -3.543892               | 1.427183  | 1.117898  |
| 47               | 6                | 0              | -4.340771               | 2.379980  | 2.012783  |
| 48               | 1                | 0              | -5.208416               | 2.781105  | 1.478807  |
| 49               | 1                | 0              | -4.692823               | 1.864647  | 2.912228  |
| 50               | 1                | 0              | -3.706213               | 3.216746  | 2.320936  |
| 51               | 6                | 0              | -2.375795               | 0.809434  | 1.887986  |
| 52               | 1                | 0              | -2.744791               | 0.224866  | 2.737736  |

|    |    |   |           |           |           |
|----|----|---|-----------|-----------|-----------|
| 53 | 1  | 0 | -1.742527 | 0.175059  | 1.266494  |
| 54 | 1  | 0 | -1.743403 | 1.611557  | 2.282786  |
| 55 | 6  | 0 | -3.109844 | 2.128819  | -0.170756 |
| 56 | 1  | 0 | -2.479262 | 1.497451  | -0.797836 |
| 57 | 1  | 0 | -3.986282 | 2.450282  | -0.744604 |
| 58 | 1  | 0 | -2.529339 | 3.021392  | 0.086660  |
| 59 | 19 | 0 | -0.902581 | -1.418219 | -1.434244 |
| 60 | 6  | 0 | 0.854129  | 1.574663  | -1.188800 |
| 61 | 6  | 0 | 0.957135  | 3.072551  | -1.257113 |
| 62 | 6  | 0 | 0.164424  | 3.734433  | -2.205178 |
| 63 | 6  | 0 | 1.793041  | 3.827802  | -0.420557 |
| 64 | 6  | 0 | 0.209314  | 5.121786  | -2.322791 |
| 65 | 1  | 0 | -0.479576 | 3.137581  | -2.842041 |
| 66 | 6  | 0 | 1.833859  | 5.216719  | -0.537086 |
| 67 | 1  | 0 | 2.408821  | 3.347359  | 0.333801  |
| 68 | 6  | 0 | 1.045467  | 5.867122  | -1.488468 |
| 69 | 1  | 0 | -0.406468 | 5.622058  | -3.065685 |
| 70 | 1  | 0 | 2.482441  | 5.791020  | 0.118734  |
| 71 | 1  | 0 | 1.082022  | 6.949702  | -1.577907 |
| 72 | 7  | 0 | 1.774298  | 0.936189  | -0.445726 |
| 73 | 1  | 0 | 2.452582  | 1.349123  | 0.220043  |
| 74 | 8  | 0 | -0.037711 | 0.978223  | -1.832041 |
| 75 | 1  | 0 | 2.477767  | -2.238184 | -0.399159 |

-----  
Zero-point correction= 0.618699 (Hartree/Particle)  
Thermal correction to Energy= 0.658888  
Thermal correction to Enthalpy= 0.659832  
Thermal correction to Gibbs Free Energy= 0.536269  
Sum of electronic and zero-point Energies= -2250.492603  
Sum of electronic and thermal Energies= -2250.452414  
Sum of electronic and thermal Enthalpies= -2250.451470  
Sum of electronic and thermal Free Energies= -2250.575033  
M06-2X /6-311++G (d, p)/SMD// B3LYP /6-31G(d) energy=-2250.907865

### K<sup>+</sup>\_1a2a

| Center<br>Number | Atomic<br>Number | Atomic<br>Type | Coordinates (Angstroms) |           |           |
|------------------|------------------|----------------|-------------------------|-----------|-----------|
|                  |                  |                | X                       | Y         | Z         |
| 1                | 6                | 0              | -2.665090               | -0.789454 | -1.081781 |
| 2                | 6                | 0              | -4.105444               | -0.914694 | -0.710899 |
| 3                | 6                | 0              | -5.016464               | -0.029742 | -1.304866 |
| 4                | 6                | 0              | -4.575803               | -1.887874 | 0.184366  |
| 5                | 6                | 0              | -6.371335               | -0.100187 | -0.991590 |
| 6                | 1                | 0              | -4.645178               | 0.707298  | -2.008922 |
| 7                | 6                | 0              | -5.933547               | -1.962723 | 0.489415  |
| 8                | 1                | 0              | -3.894810               | -2.615570 | 0.617136  |
| 9                | 6                | 0              | -6.831840               | -1.065628 | -0.092847 |
| 10               | 1                | 0              | -7.069632               | 0.593631  | -1.450512 |
| 11               | 1                | 0              | -6.292006               | -2.726673 | 1.173072  |
| 12               | 1                | 0              | -7.889600               | -1.124767 | 0.146998  |
| 13               | 7                | 0              | -1.749016               | -1.339329 | -0.249455 |
| 14               | 1                | 0              | -1.973782               | -1.624691 | 0.693074  |
| 15               | 8                | 0              | -2.313688               | -0.206738 | -2.124164 |
| 16               | 1                | 0              | -0.768592               | -1.232563 | -0.484935 |
| 17               | 8                | 0              | 1.189616                | -0.832528 | -1.481632 |
| 18               | 6                | 0              | 2.089792                | -0.543204 | -0.693802 |
| 19               | 6                | 0              | 3.370529                | -1.287717 | -0.683045 |
| 20               | 7                | 0              | 1.943661                | 0.523538  | 0.234757  |
| 21               | 6                | 0              | 3.374893                | -2.615307 | -1.145406 |
| 22               | 6                | 0              | 4.581711                | -0.676257 | -0.313402 |
| 23               | 6                | 0              | 1.299262                | 1.695759  | -0.182791 |
| 24               | 6                | 0              | 2.174505                | 0.230259  | 1.685909  |
| 25               | 6                | 0              | 4.568564                | -3.327043 | -1.212058 |
| 26               | 1                | 0              | 2.437440                | -3.074537 | -1.442219 |
| 27               | 6                | 0              | 5.775658                | -1.387364 | -0.399604 |
| 28               | 1                | 0              | 4.588364                | 0.359732  | 0.012068  |



|    |    |   |           |           |           |
|----|----|---|-----------|-----------|-----------|
| 29 | 8  | 0 | 1.024961  | 1.927110  | -1.355048 |
| 30 | 8  | 0 | 1.098790  | 2.520854  | 0.839952  |
| 31 | 1  | 0 | 3.087035  | -0.361792 | 1.753125  |
| 32 | 1  | 0 | 2.351322  | 1.182380  | 2.181962  |
| 33 | 6  | 0 | 1.016655  | -0.524166 | 2.312986  |
| 34 | 6  | 0 | 5.769020  | -2.713854 | -0.840278 |
| 35 | 1  | 0 | 4.566771  | -4.356707 | -1.556518 |
| 36 | 1  | 0 | 6.711050  | -0.908099 | -0.127436 |
| 37 | 6  | 0 | 0.599649  | 3.922541  | 0.656553  |
| 38 | 6  | 0 | -0.071299 | 0.156610  | 2.876170  |
| 39 | 6  | 0 | 1.015657  | -1.926474 | 2.320348  |
| 40 | 1  | 0 | 6.700912  | -3.268648 | -0.898478 |
| 41 | 6  | 0 | -0.817999 | 3.890888  | 0.084593  |
| 42 | 6  | 0 | 1.582154  | 4.701546  | -0.218795 |
| 43 | 6  | 0 | 0.602546  | 4.454057  | 2.090131  |
| 44 | 6  | 0 | -1.141744 | -0.549248 | 3.427525  |
| 45 | 1  | 0 | -0.074253 | 1.242060  | 2.888728  |
| 46 | 6  | 0 | -0.054841 | -2.635461 | 2.869034  |
| 47 | 1  | 0 | 1.863185  | -2.469074 | 1.907522  |
| 48 | 1  | 0 | -1.233949 | 4.903752  | 0.101837  |
| 49 | 1  | 0 | -0.826835 | 3.533023  | -0.946130 |
| 50 | 1  | 0 | -1.466088 | 3.250002  | 0.691414  |
| 51 | 1  | 0 | 1.601425  | 4.322257  | -1.241941 |
| 52 | 1  | 0 | 1.280212  | 5.753704  | -0.245828 |
| 53 | 1  | 0 | 2.592820  | 4.653463  | 0.199869  |
| 54 | 1  | 0 | 0.267644  | 5.495750  | 2.096364  |
| 55 | 1  | 0 | -0.074130 | 3.875400  | 2.727108  |
| 56 | 1  | 0 | 1.607965  | 4.415425  | 2.520478  |
| 57 | 6  | 0 | -1.138025 | -1.947226 | 3.422471  |
| 58 | 1  | 0 | -1.972280 | -0.009143 | 3.873435  |
| 59 | 1  | 0 | -0.034929 | -3.721582 | 2.879822  |
| 60 | 1  | 0 | -1.962974 | -2.496351 | 3.868045  |
| 61 | 19 | 0 | -0.180001 | 0.586055  | -3.271007 |

-----  
Zero-point correction= 0.495601 (Hartree/Particle)  
Thermal correction to Energy= 0.528654  
Thermal correction to Enthalpy= 0.529598  
Thermal correction to Gibbs Free Energy= 0.424938  
Sum of electronic and zero-point Energies= -2017.416728  
Sum of electronic and thermal Energies= -2017.383675  
Sum of electronic and thermal Enthalpies= -2017.382731  
Sum of electronic and thermal Free Energies= -2017.487391  
M06-2X /6-311++G (d, p)/SMD// B3LYP /6-31G(d) energy=-2017.769996

#### O'Bu<sub>-</sub>anion

| Center<br>Number | Atomic<br>Number | Atomic<br>Type | Coordinates (Angstroms) |           |           |
|------------------|------------------|----------------|-------------------------|-----------|-----------|
|                  |                  |                | X                       | Y         | Z         |
| 1                | 8                | 0              | 0.000422                | -0.002049 | 1.483797  |
| 2                | 6                | 0              | 0.000088                | -0.000220 | 0.159522  |
| 3                | 6                | 0              | -1.140961               | -0.915601 | -0.437425 |
| 4                | 1                | 0              | -2.108285               | -0.559600 | -0.055183 |
| 5                | 1                | 0              | -1.197333               | -0.956303 | -1.541619 |
| 6                | 1                | 0              | -0.999755               | -1.938835 | -0.061005 |
| 7                | 6                | 0              | 1.363912                | -0.529076 | -0.437557 |
| 8                | 1                | 0              | 1.429995                | -0.550669 | -1.541754 |
| 9                | 1                | 0              | 2.179007                | 0.101762  | -0.055160 |
| 10               | 1                | 0              | 1.537531                | -1.547374 | -0.061317 |
| 11               | 6                | 0              | -0.223323               | 1.446477  | -0.435238 |
| 12               | 1                | 0              | -0.233950               | 1.515860  | -1.539352 |
| 13               | 1                | 0              | -1.178731               | 1.835876  | -0.055455 |
| 14               | 1                | 0              | 0.569846                | 2.106199  | -0.055348 |

-----  
Zero-point correction= 0.120309 (Hartree/Particle)  
Thermal correction to Energy= 0.126797  
Thermal correction to Enthalpy= 0.127742

Thermal correction to Gibbs Free Energy= 0.091523  
 Sum of electronic and zero-point Energies= -232.918967  
 Sum of electronic and thermal Energies= -232.912478  
 Sum of electronic and thermal Enthalpies= -232.911534  
 Sum of electronic and thermal Free Energies= -232.947753  
 M06-2X /6-311++G (d, p)/SMD// B3LYP /6-31G(d) energy=-233.069240

**KO<sup>t</sup>Bu\_1a**

| Center Number | Atomic Number | Atomic Type | Coordinates (Angstroms) |           |           |
|---------------|---------------|-------------|-------------------------|-----------|-----------|
|               |               |             | X                       | Y         | Z         |
| 1             | 8             | 0           | 2.399750                | 0.106745  | 0.028202  |
| 2             | 6             | 0           | -1.060981               | 0.342009  | -0.026298 |
| 3             | 6             | 0           | -2.514461               | -0.055036 | -0.010145 |
| 4             | 6             | 0           | -3.457089               | 0.903916  | 0.383023  |
| 5             | 6             | 0           | -2.959347               | -1.328558 | -0.391649 |
| 6             | 6             | 0           | -4.813532               | 0.588530  | 0.423351  |
| 7             | 1             | 0           | -3.103128               | 1.893042  | 0.654075  |
| 8             | 6             | 0           | -4.318301               | -1.641785 | -0.363022 |
| 9             | 1             | 0           | -2.249570               | -2.072180 | -0.744563 |
| 10            | 6             | 0           | -5.247806               | -0.686251 | 0.051583  |
| 11            | 1             | 0           | -5.534120               | 1.337565  | 0.741227  |
| 12            | 1             | 0           | -4.650951               | -2.629469 | -0.670950 |
| 13            | 1             | 0           | -6.306264               | -0.931594 | 0.077589  |
| 14            | 7             | 0           | -0.141183               | -0.624133 | 0.076291  |
| 15            | 1             | 0           | -0.445615               | -1.568194 | 0.267289  |
| 16            | 8             | 0           | -0.762582               | 1.554842  | -0.131277 |
| 17            | 1             | 0           | 0.927957                | -0.404519 | 0.066948  |
| 18            | 6             | 0           | 3.406314                | -0.847739 | 0.089187  |
| 19            | 6             | 0           | 3.304215                | -1.817279 | -1.114122 |
| 20            | 1             | 0           | 4.095472                | -2.579259 | -1.115538 |
| 21            | 1             | 0           | 2.336037                | -2.333822 | -1.103464 |
| 22            | 1             | 0           | 3.367725                | -1.251638 | -2.052012 |
| 23            | 6             | 0           | 3.302610                | -1.657249 | 1.405425  |
| 24            | 1             | 0           | 2.339228                | -2.180769 | 1.454856  |
| 25            | 1             | 0           | 4.099389                | -2.406328 | 1.509488  |
| 26            | 1             | 0           | 3.354192                | -0.975653 | 2.263284  |
| 27            | 6             | 0           | 4.786262                | -0.148647 | 0.046367  |
| 28            | 1             | 0           | 4.879036                | 0.433154  | -0.880606 |
| 29            | 1             | 0           | 4.879254                | 0.542606  | 0.894526  |
| 30            | 1             | 0           | 5.626457                | -0.854776 | 0.089235  |
| 31            | 19            | 0           | 1.668870                | 2.376137  | -0.217001 |

Zero-point correction= 0.252294 (Hartree/Particle)  
 Thermal correction to Energy= 0.269531  
 Thermal correction to Enthalpy= 0.270475  
 Thermal correction to Gibbs Free Energy= 0.203666  
 Sum of electronic and zero-point Energies= -1233.735397  
 Sum of electronic and thermal Energies= -1233.718161  
 Sum of electronic and thermal Enthalpies= -1233.717217  
 Sum of electronic and thermal Free Energies= -1233.784026  
 M06-2X /6-311++G (d, p)/SMD// B3LYP /6-31G(d) energy=-1233.925844

**KO<sup>t</sup>Bu\_2a**

| Center Number | Atomic Number | Atomic Type | Coordinates (Angstroms) |           |           |
|---------------|---------------|-------------|-------------------------|-----------|-----------|
|               |               |             | X                       | Y         | Z         |
| 1             | 8             | 0           | -3.132037               | -0.132476 | 0.162645  |
| 2             | 8             | 0           | -0.721769               | 0.487672  | -2.323316 |
| 3             | 6             | 0           | -0.276803               | 0.838165  | -1.239292 |
| 4             | 6             | 0           | -0.459199               | 2.259386  | -0.773899 |
| 5             | 7             | 0           | 0.423160                | -0.042793 | -0.391368 |
| 6             | 6             | 0           | 0.493534                | 3.244255  | -1.059503 |
| 7             | 6             | 0           | -1.671254               | 2.589980  | -0.148837 |
| 8             | 6             | 0           | 0.431627                | -1.430497 | -0.645854 |

|    |    |   |           |           |           |
|----|----|---|-----------|-----------|-----------|
| 9  | 6  | 0 | 1.083486  | 0.461697  | 0.828898  |
| 10 | 6  | 0 | 0.238567  | 4.570960  | -0.709077 |
| 11 | 1  | 0 | 1.427463  | 2.980404  | -1.548202 |
| 12 | 6  | 0 | -1.908642 | 3.921780  | 0.196638  |
| 13 | 1  | 0 | -2.391969 | 1.786500  | 0.053517  |
| 14 | 8  | 0 | -0.314000 | -2.007952 | -1.417241 |
| 15 | 8  | 0 | 1.378040  | -2.014507 | 0.097804  |
| 16 | 1  | 0 | 0.527014  | 1.345117  | 1.144921  |
| 17 | 1  | 0 | 0.951427  | -0.287784 | 1.610702  |
| 18 | 6  | 0 | 2.556580  | 0.806925  | 0.679921  |
| 19 | 6  | 0 | -0.961062 | 4.910365  | -0.080030 |
| 20 | 1  | 0 | 0.977037  | 5.337200  | -0.929495 |
| 21 | 1  | 0 | -2.843864 | 4.186476  | 0.683888  |
| 22 | 6  | 0 | 1.591299  | -3.481803 | 0.092299  |
| 23 | 6  | 0 | 3.234853  | 1.300849  | 1.802726  |
| 24 | 6  | 0 | 3.259467  | 0.665238  | -0.519600 |
| 25 | 1  | 0 | -1.156431 | 5.944618  | 0.192066  |
| 26 | 6  | 0 | 2.024776  | -3.932930 | -1.305048 |
| 27 | 6  | 0 | 0.329226  | -4.197381 | 0.581152  |
| 28 | 6  | 0 | 2.734676  | -3.642092 | 1.096700  |
| 29 | 6  | 0 | 4.583164  | 1.644830  | 1.728450  |
| 30 | 1  | 0 | 2.699962  | 1.418924  | 2.743188  |
| 31 | 6  | 0 | 4.611510  | 1.011107  | -0.597170 |
| 32 | 1  | 0 | 2.754018  | 0.280029  | -1.400272 |
| 33 | 1  | 0 | 2.295017  | -4.994257 | -1.275324 |
| 34 | 1  | 0 | 1.223895  | -3.796566 | -2.033415 |
| 35 | 1  | 0 | 2.904020  | -3.367858 | -1.632359 |
| 36 | 1  | 0 | -0.489457 | -4.101240 | -0.133699 |
| 37 | 1  | 0 | 0.549176  | -5.261853 | 0.719145  |
| 38 | 1  | 0 | 0.005752  | -3.790074 | 1.544813  |
| 39 | 1  | 0 | 3.017665  | -4.696962 | 1.172969  |
| 40 | 1  | 0 | 3.609996  | -3.066979 | 0.779795  |
| 41 | 1  | 0 | 2.432308  | -3.292579 | 2.088977  |
| 42 | 6  | 0 | 5.278139  | 1.501231  | 0.524815  |
| 43 | 1  | 0 | 5.091383  | 2.027245  | 2.609755  |
| 44 | 1  | 0 | 5.141544  | 0.894714  | -1.539005 |
| 45 | 1  | 0 | 6.329173  | 1.770246  | 0.464137  |
| 46 | 6  | 0 | -3.626573 | -0.457244 | 1.403858  |
| 47 | 6  | 0 | -4.262477 | -1.876721 | 1.389823  |
| 48 | 1  | 0 | -4.668794 | -2.188198 | 2.362846  |
| 49 | 1  | 0 | -5.082461 | -1.905365 | 0.658407  |
| 50 | 1  | 0 | -3.508376 | -2.617593 | 1.087292  |
| 51 | 6  | 0 | -4.718502 | 0.553879  | 1.845746  |
| 52 | 1  | 0 | -5.523339 | 0.570977  | 1.100073  |
| 53 | 1  | 0 | -5.158961 | 0.318855  | 2.825461  |
| 54 | 1  | 0 | -4.292296 | 1.563648  | 1.897708  |
| 55 | 6  | 0 | -2.490173 | -0.450035 | 2.463895  |
| 56 | 1  | 0 | -1.711044 | -1.166848 | 2.169842  |
| 57 | 1  | 0 | -2.031792 | 0.545930  | 2.508053  |
| 58 | 1  | 0 | -2.833311 | -0.712988 | 3.474854  |
| 59 | 19 | 0 | -2.807688 | -1.103039 | -2.008413 |

-----

Zero-point correction= 0.489502 (Hartree/Particle)  
Thermal correction to Energy= 0.521293  
Thermal correction to Enthalpy= 0.522237  
Thermal correction to Gibbs Free Energy= 0.421307  
Sum of electronic and zero-point Energies= -1849.659369  
Sum of electronic and thermal Energies= -1849.627577  
Sum of electronic and thermal Enthalpies= -1849.626633  
Sum of electronic and thermal Free Energies= -1849.727563  
M06-2X /6-311++G (d, p)/SMD// B3LYP /6-31G(d) energy=-1850.004292

## References

1. Weires, N. A., Baker, E. L. & Garg, N. K. *Nat. Chem.* **8**, 75-79 (2016).
2. Hara, O., Ito, M. & Hamada, Y. *Tetrahedron Lett.* **39**, 5537-5540 (1998).
3. Yang, F., Zou, D., Chen, S., Wang, H., Zhao, Y., Zhao, L., Li, L., Li J. & Walsh, P. J. *Adv. Synth. Catal.* **362**, 3423-3430 (2020).
4. Ye, D., Liu, Z., Chen, H., Sessler, J. L. & Lei, C. *Org. Lett.* **21**, 6888-6892 (2019).
5. Liptrot, D., Alcaraz, L. & Roberts, B. *Adv. Synth. Catal.* **352**, 2183-2188 (2010).
6. Haecker, H. G., Meusel, M., Aschfalk, M., Gutschow, M. *ACS Comb. Sci.* **13**, 59-64 (2011).
7. Kataoka, K., Wachi, K., Jin, X., Suzuki, K., Sasano, Y., Iwabuchi, Y., Hasegawa, J., Mizuno, N., Yamaguchi, K. *Chem. Sci.* **9**, 4756-4768 (2018).
8. Li, J., Yao, J. Q., Chen, L. F., Zou, D., Walsh, P. J., Liang, G. *Org. Chem. Front.* **8**, 6344-6349 (2021).
9. Yu, H., Chen, Y. & Zhang, Y. *Chinese J. Chem.* **33**, 531-534 (2015).
10. Veverkova, E. & Toma, S. *Chemical Papers.* **59**, 8-10 (2005).
11. Xu, L., Zhang, S. H. & Trudell, M. L. *Chem. Commun.* **14**, 1668-1669 (2004).
12. Shneshil, M. K. & Saleem, A. J. *Biochemical and Cellular Archives.* **18**, 643-647 (2018).
13. (a) Lee, C., Yang, W. & Parr, R. G. *Phys. Rev. B*, **37**, 785 (1988). (b) Becke, A. D. *J. Chem. Phys.* **98**, 5648 (1993).
14. Hariharan, P. C. & Pople, J. A. *Theor. Chim. Acta* **28**, 213 (1973).
15. (a) Fukui, K. *J. Phys. Chem.*, **74**, 4161 (1970); (b) Fukui, K. *Acc. Chem. Res.* **14**, 363 (1981).
16. (a) Zhao, Y. & Truhlar, D. G. *Theor. Chim. Acta*, **120**, 215 (2008). (b) Zhao, Y. & Truhlar, D. G. *J. Chem. Phys.* **125**, 194101 (2006).
17. Marenich, A. V., Cramer, C. J. & D. G. Truhlar, *J. Phys. Chem. B* **113**, 6378 (2009).
18. Frisch, M. J., Trucks, G. W., Schlegel, H. B., Scuseria, G. E., Robb, M. A., Cheeseman, J. R., Scalmani, G., Barone, V., Mennucci, B., Petersson, G. A., Nakatsuji, H., Caricato, M., Li, X., Hratchian, H. P., Izmaylov, A. F., Bloino, J., Zheng, G., Sonnenberg, J. L., Hada, M., Ehara, M., Toyota, K., Fukuda, R., Hasegawa, J., Ishida, M., Nakajima, T., Honda, Y., Kitao, O., Nakai, H., Vreven, T., Montgomery, J. A., Peralta, J. E., Ogliaro, F., Bearpark, M., Heyd, J. J., Brothers, E., Kudin, K. N., Staroverov, V. N., Kobayashi, R., Normand, J., Raghavachari, K., Rendell, A., Burant, J. C., Iyengar, S. S., Tomasi, J., Cossi, M., Rega, N., Millam, N. J., Klene, M., Knox, J. E., Cross,

J. B., Bakken, V., Adamo, C., Jaramillo, J., Gomperts, R., Stratmann, R. E., Yazyev, O., Austin, A. J., Cammi, R., Pomelli, C., Ochterski, J. W., Martin, R. L., Morokuma, K., Zakrzewski, V. G., Voth, G. A., Salvador, P., Dannenberg, J. J., Dapprich, S., Daniels, A. D., Farkas, O., Foresman, J. B., Ortiz, J. V., Cioslowski, J. & Fox, D. J. Gaussian 09, Revision C.01, Gaussian, Inc., Wallingford, CT, 2010.

19. Legault, C. Y. CYLview, 1.0b, Université de Sherbrooke, Sherbrooke, Quebec, Canada, 2009, <http://www.Cylview.org>.

## NMR Spectra

### Supplementary Figure 3. $^1\text{H}$ NMR Spectrum of 2a (500 MHz, $\text{CDCl}_3$ )

JM-2203211

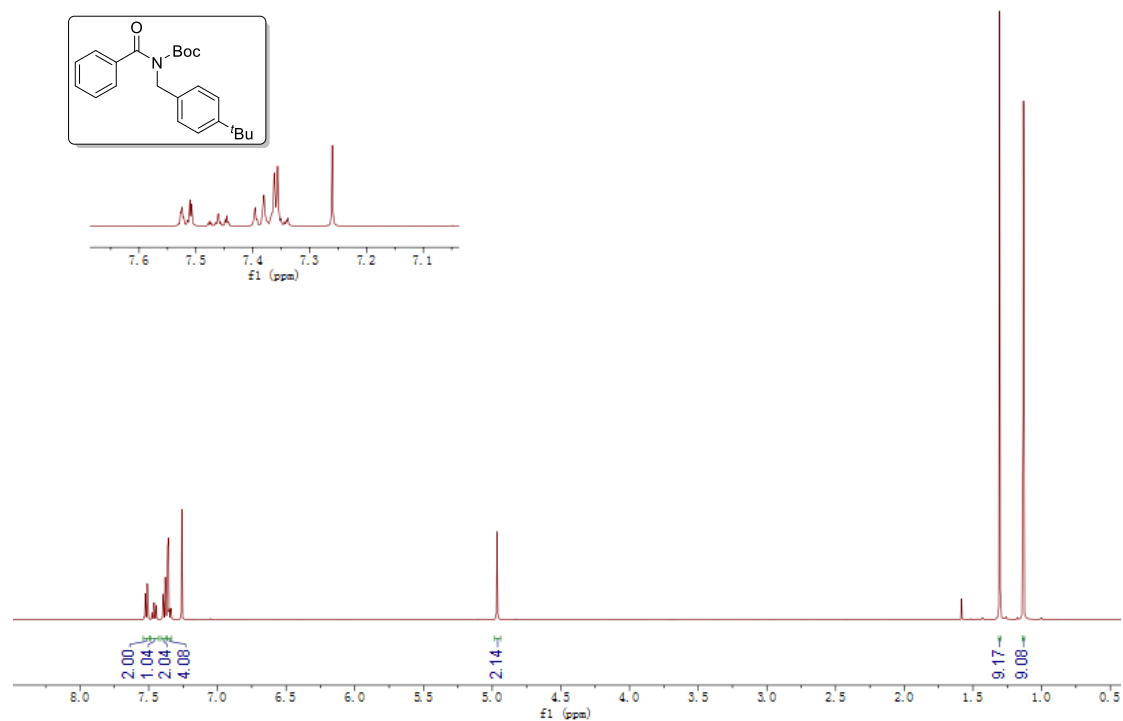

### Supplementary Figure 4. $^{13}\text{C}$ NMR Spectrum of 2a (125 MHz, $\text{CDCl}_3$ )

JM-2203211

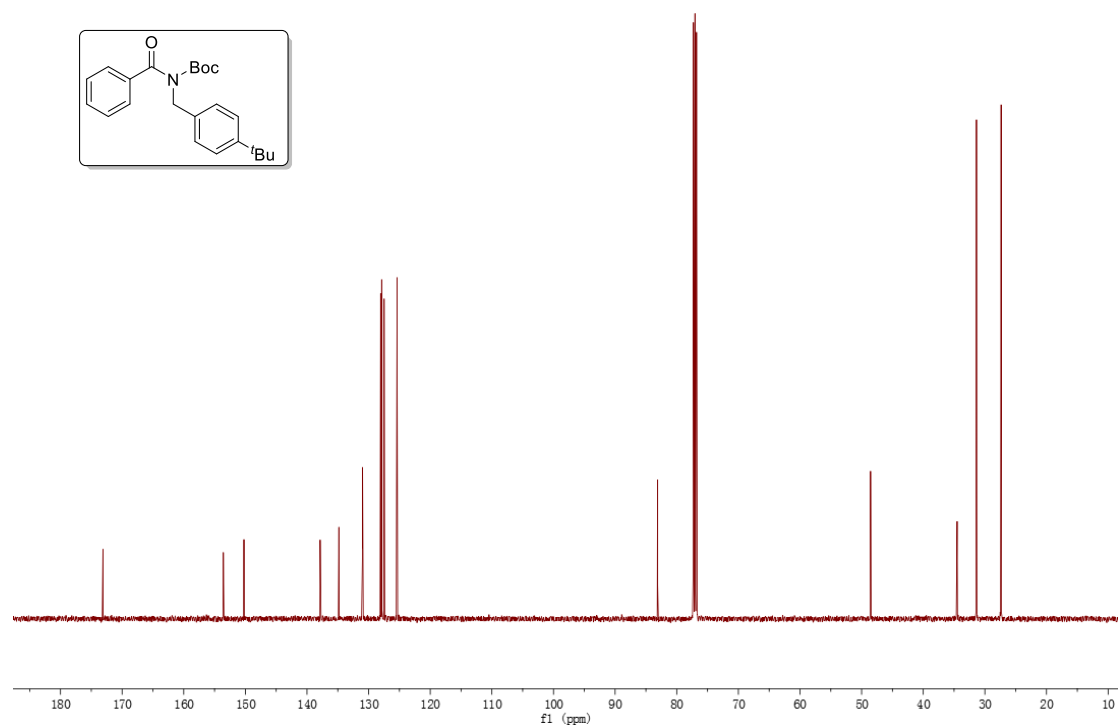

Supplementary Figure 5.  $^1\text{H}$  NMR Spectrum of 2c (500 MHz,  $\text{CDCl}_3$ )

M-220224

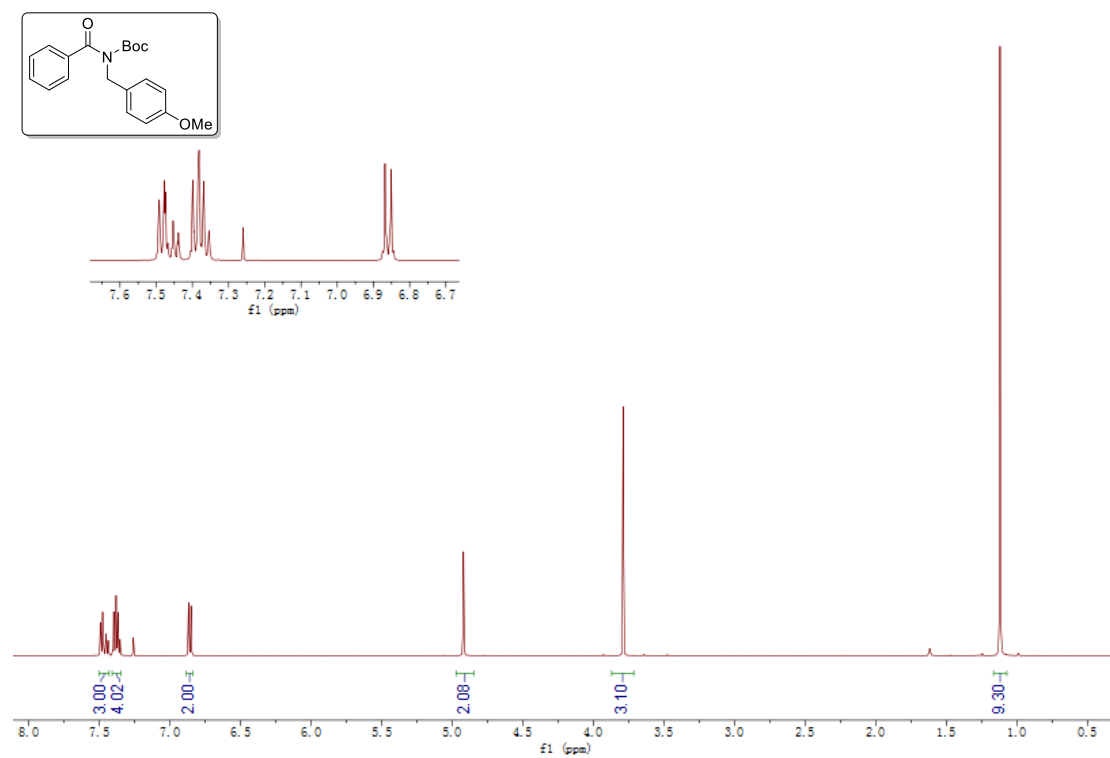

Supplementary Figure 6.  $^{13}\text{C}$  NMR Spectrum of 2c (125 MHz,  $\text{CDCl}_3$ )

SJ-2C

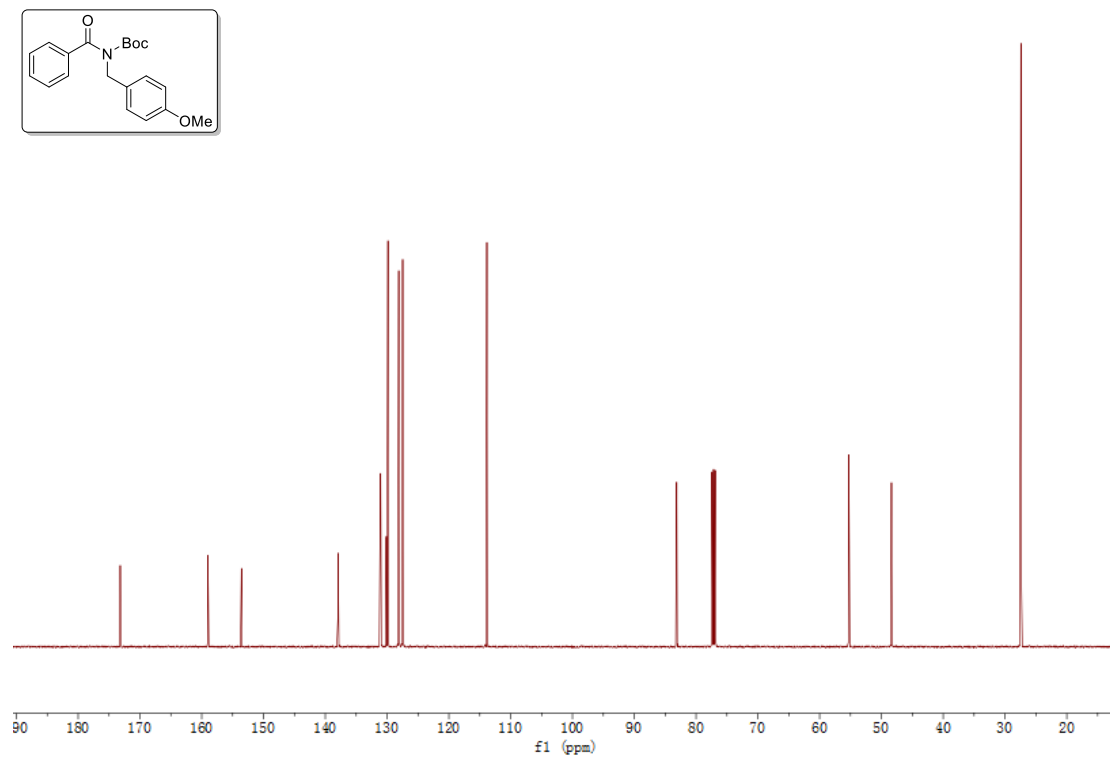

### Supplementary Figure 7. <sup>1</sup>H NMR Spectrum of 2d (500 MHz, CDCl<sub>3</sub>)

SJ-2d.3.fid

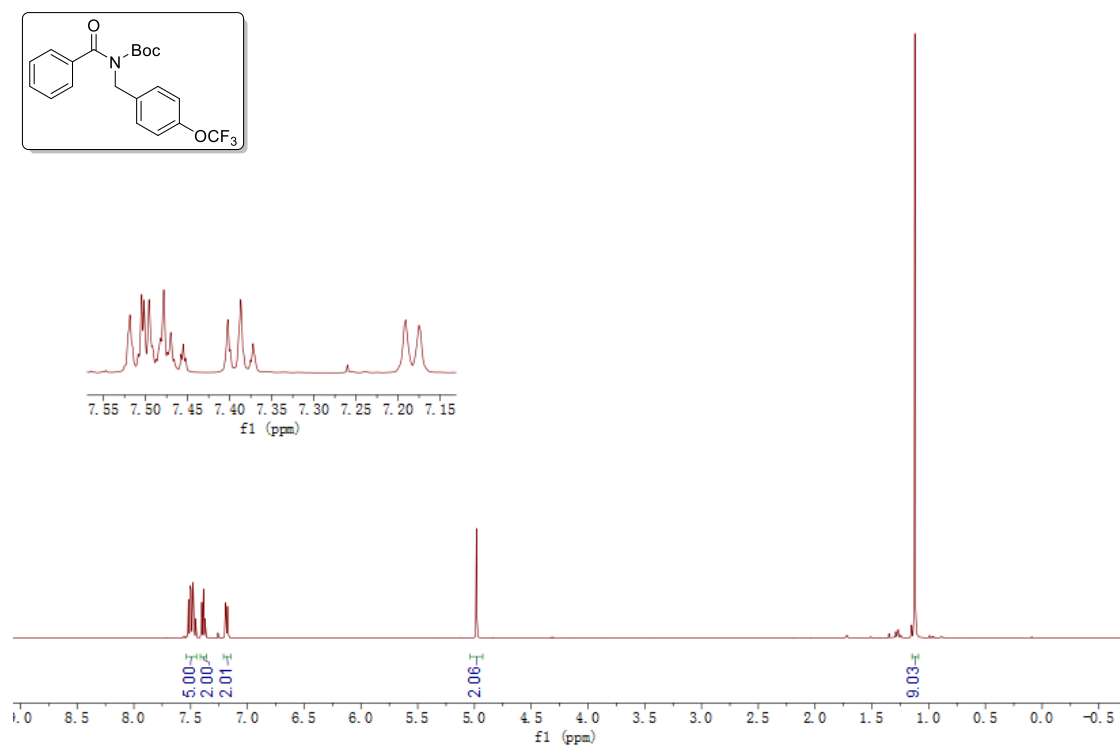

### Supplementary Figure 8. <sup>13</sup>C NMR Spectrum of 2d (125 MHz, CDCl<sub>3</sub>)

SJ-2d.2.fid

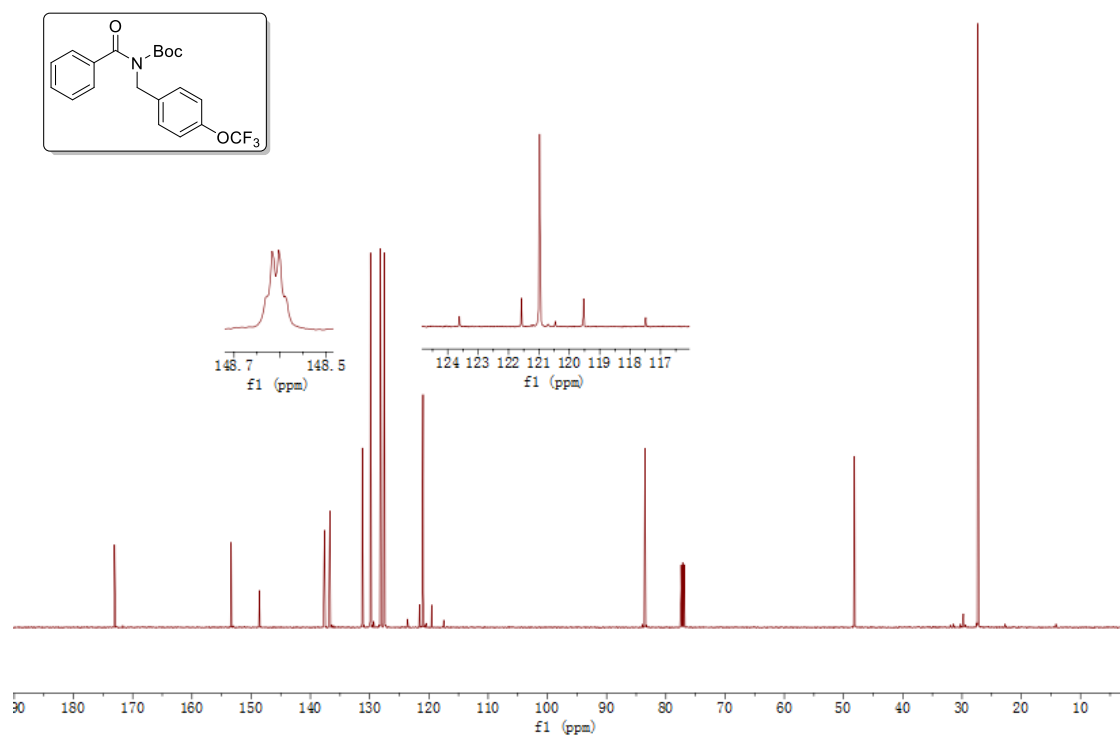



### Supplementary Figure 9. $^1\text{H}$ NMR Spectrum of 2e (500 MHz, $\text{CDCl}_3$ )

JM-2203221

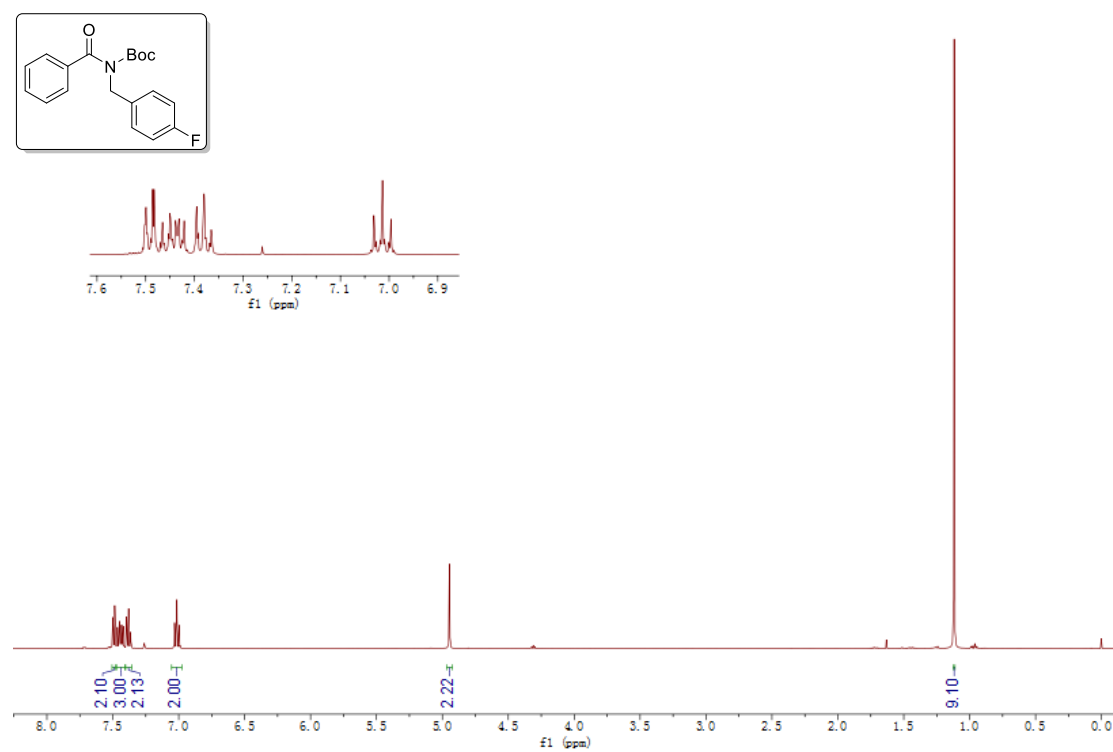

### Supplementary Figure 10. $^{13}\text{C}$ NMR Spectrum of 2e (125 MHz, $\text{CDCl}_3$ )

JM-2203221

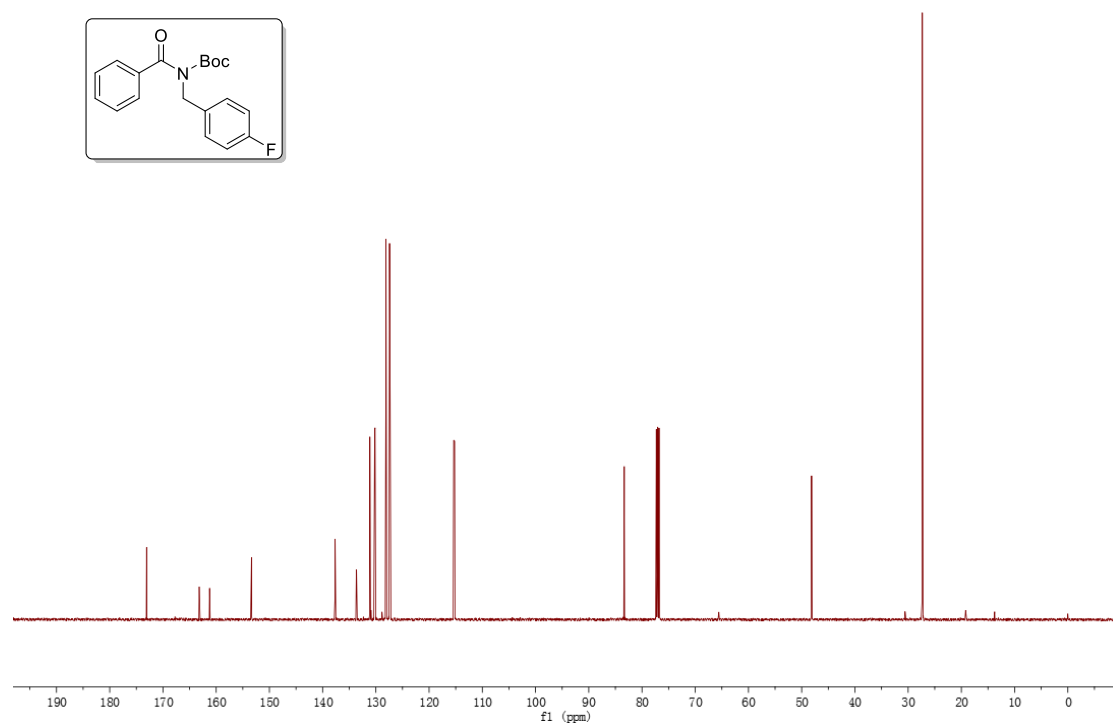

Supplementary Figure 11.  $^1\text{H}$  NMR Spectrum of 2f (500 MHz,  $\text{CDCl}_3$ )

JM-2203222

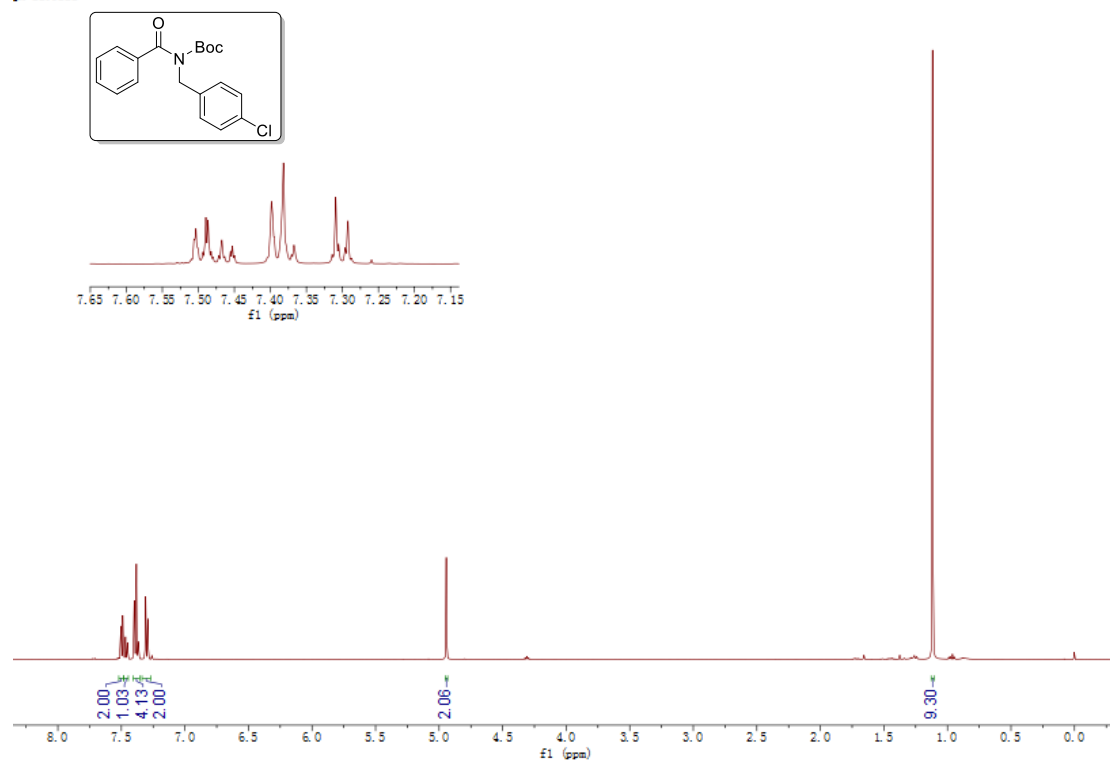

Supplementary Figure 12.  $^{13}\text{C}$  NMR Spectrum of 2f (125 MHz,  $\text{CDCl}_3$ )

JM-2203222

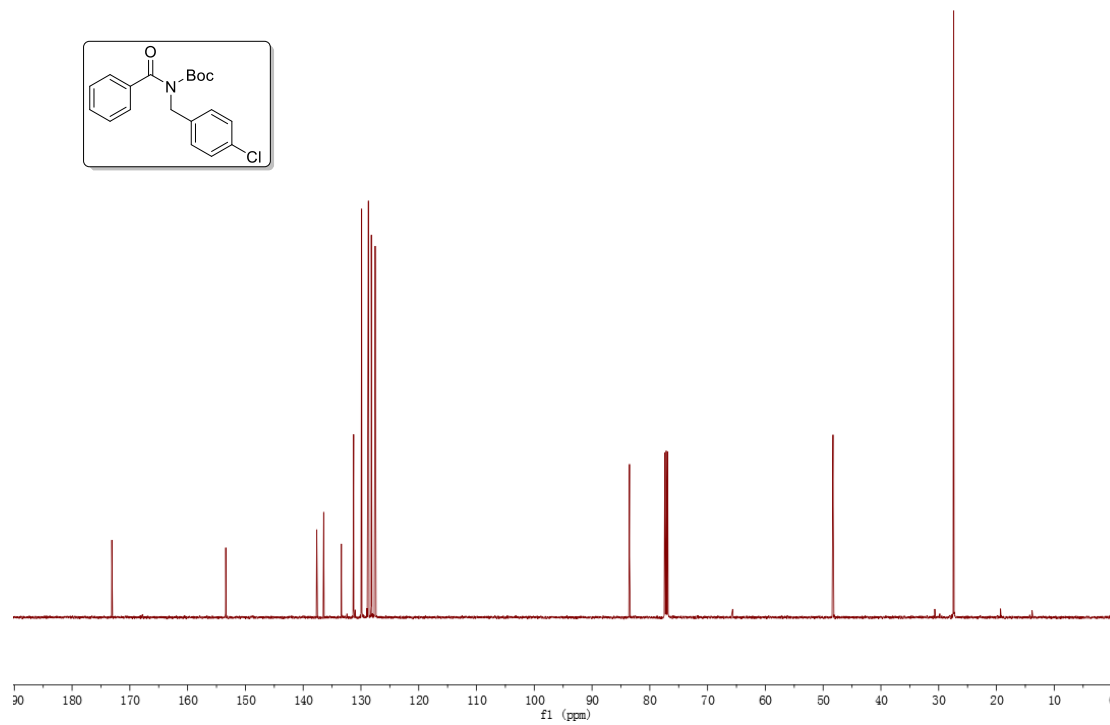

Supplementary Figure 13. <sup>1</sup>H NMR Spectrum of 2g (500 MHz, CDCl<sub>3</sub>)

JM-2203213

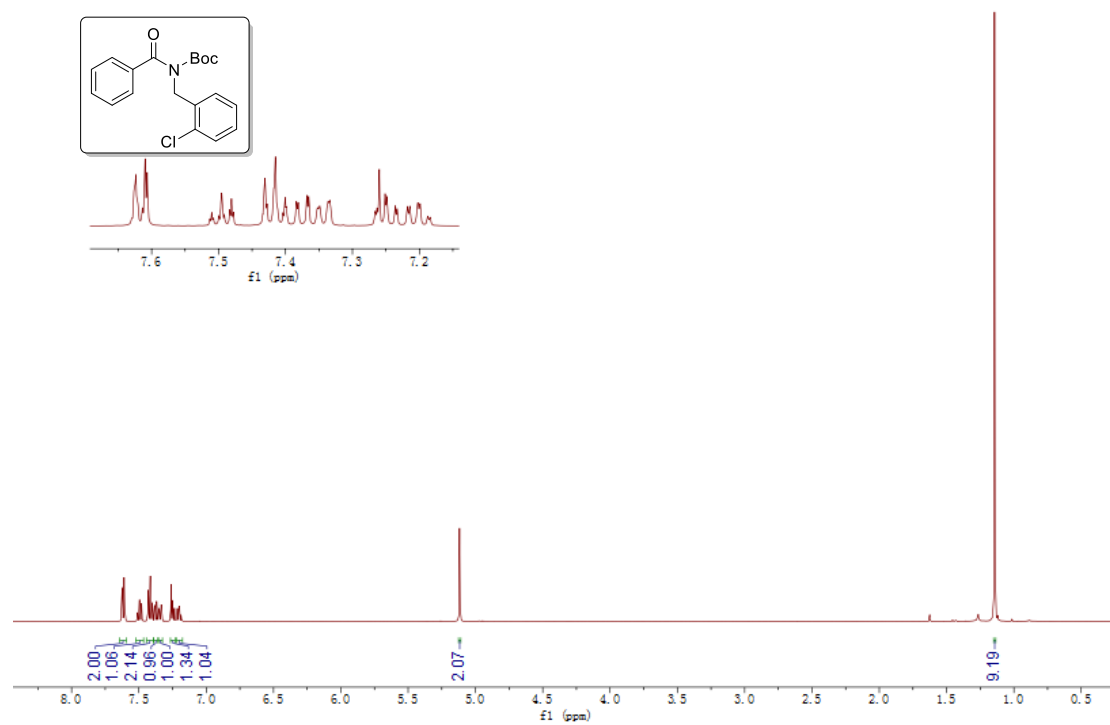

Supplementary Figure 14. <sup>13</sup>C NMR Spectrum of 2g (125 MHz, CDCl<sub>3</sub>)

JM-2203213

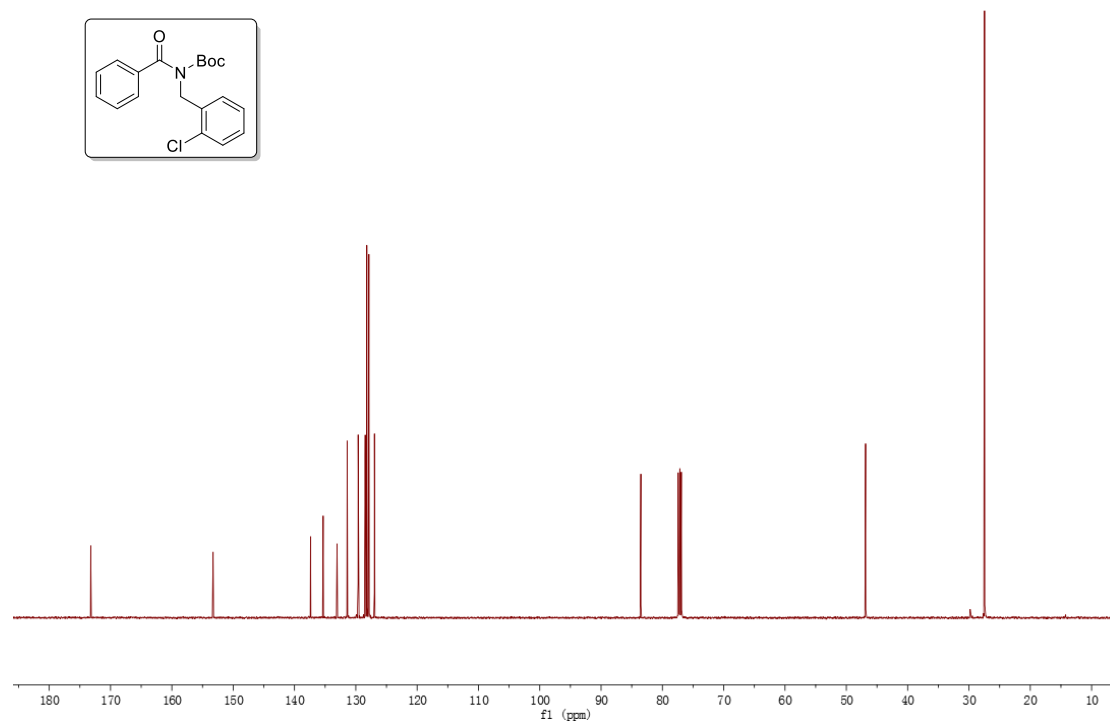

Supplementary Figure 15. <sup>1</sup>H NMR Spectrum of 2h (500 MHz, CDCl<sub>3</sub>)

JM-2203223

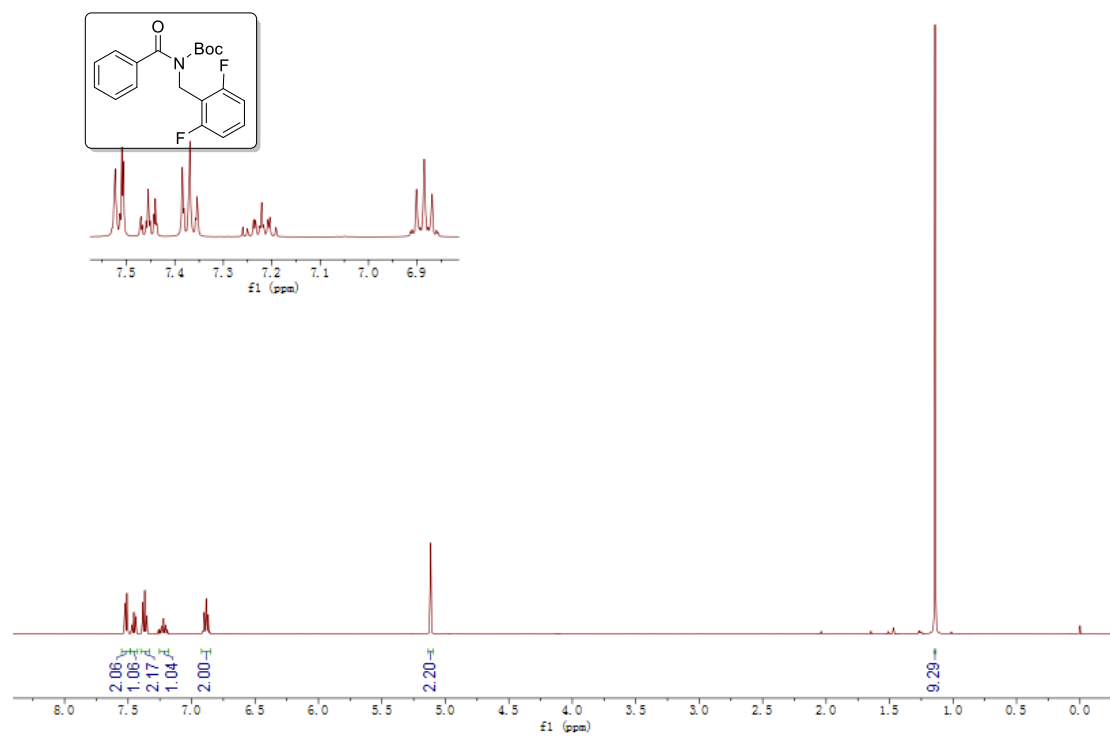

Supplementary Figure 16. <sup>13</sup>C NMR Spectrum of 2h (125 MHz, CDCl<sub>3</sub>)

JM-2203223

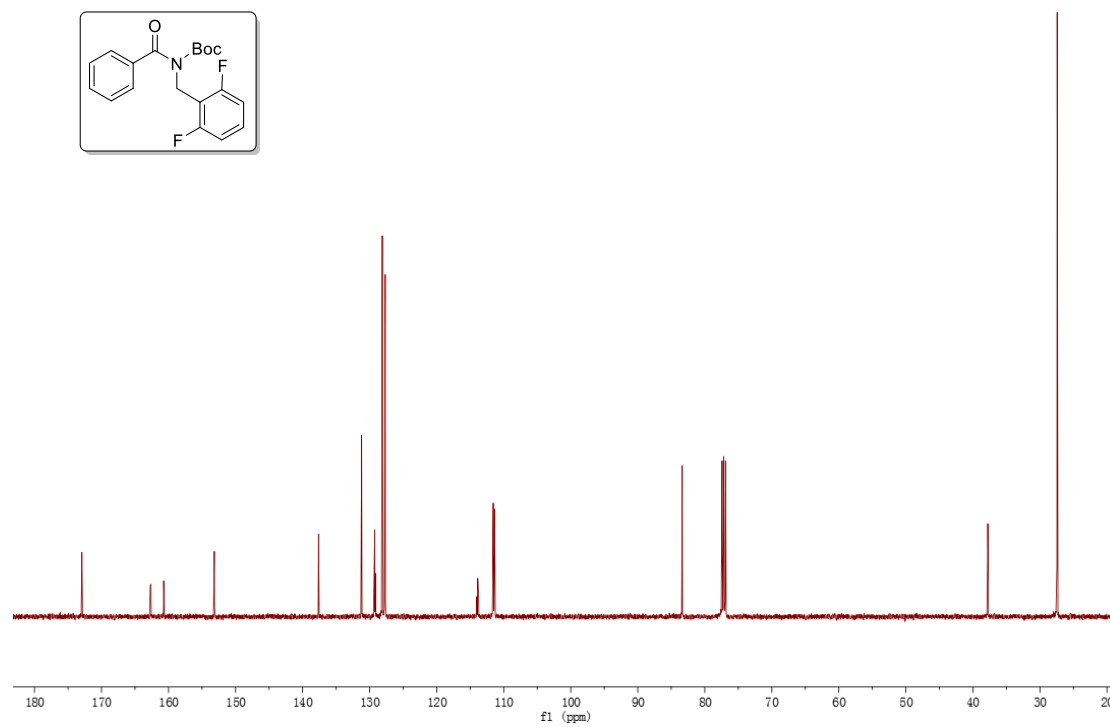

Supplementary Figure 17. <sup>1</sup>H NMR Spectrum of 2i (500 MHz, CDCl<sub>3</sub>)

JM-2203234

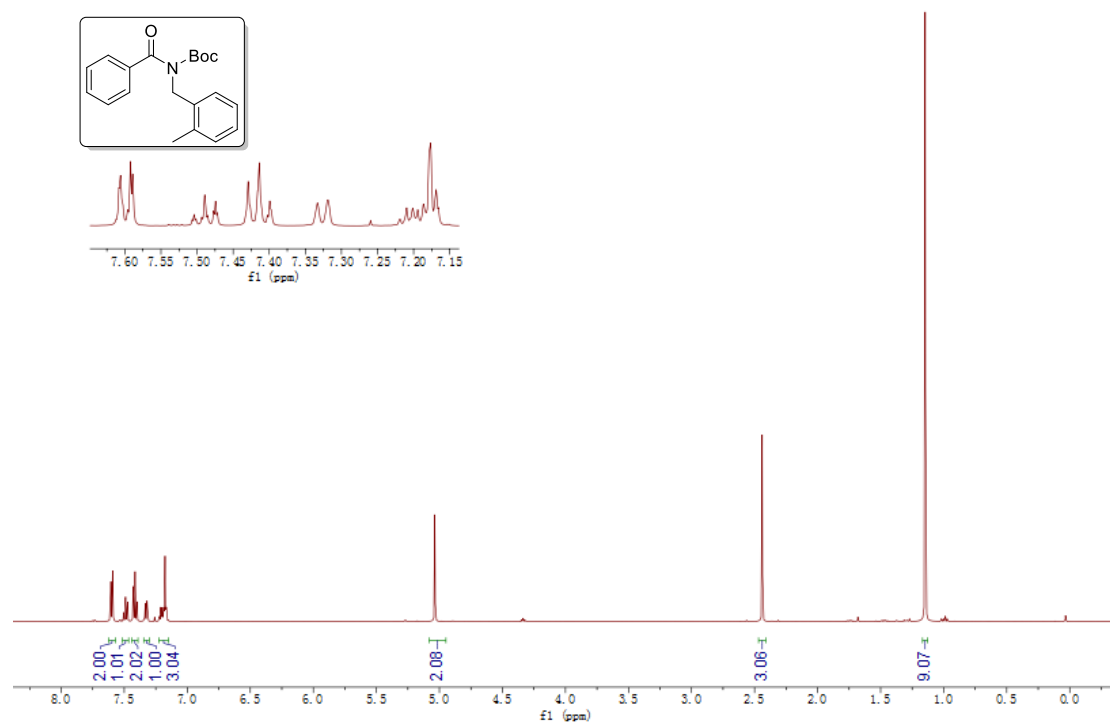

Supplementary Figure 18. <sup>13</sup>C NMR Spectrum of 2i (125 MHz, CDCl<sub>3</sub>)

JM-2203234

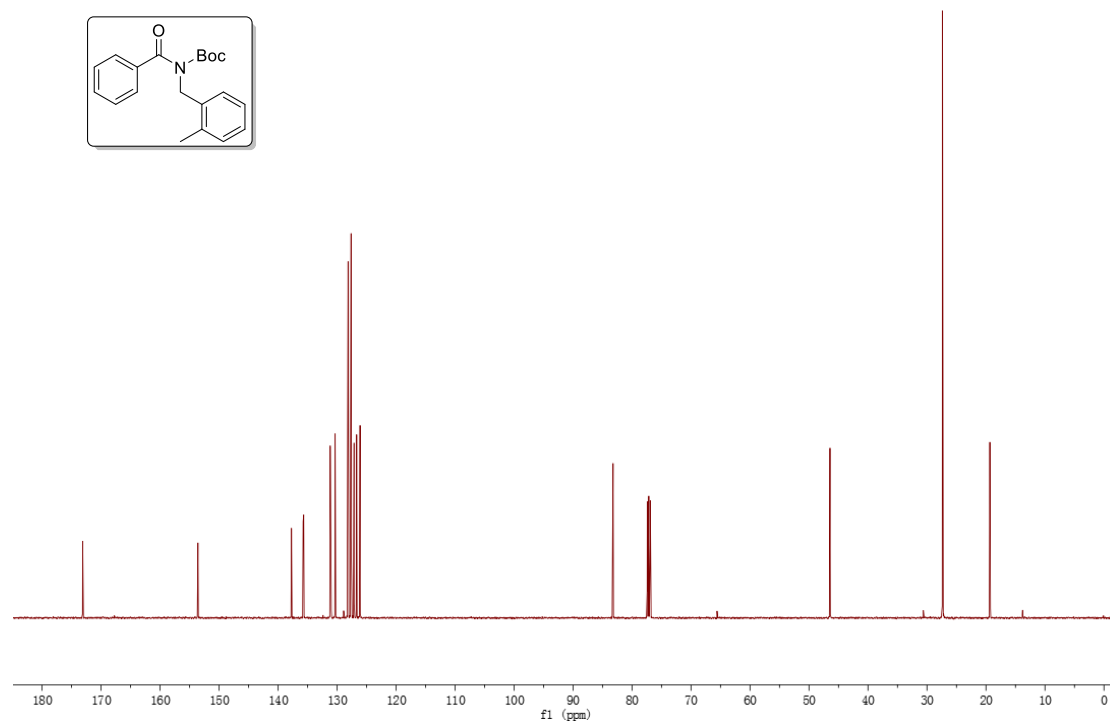

Supplementary Figure 19.  $^1\text{H}$  NMR Spectrum of 2k (500 MHz,  $\text{CDCl}_3$ )

JM-220331

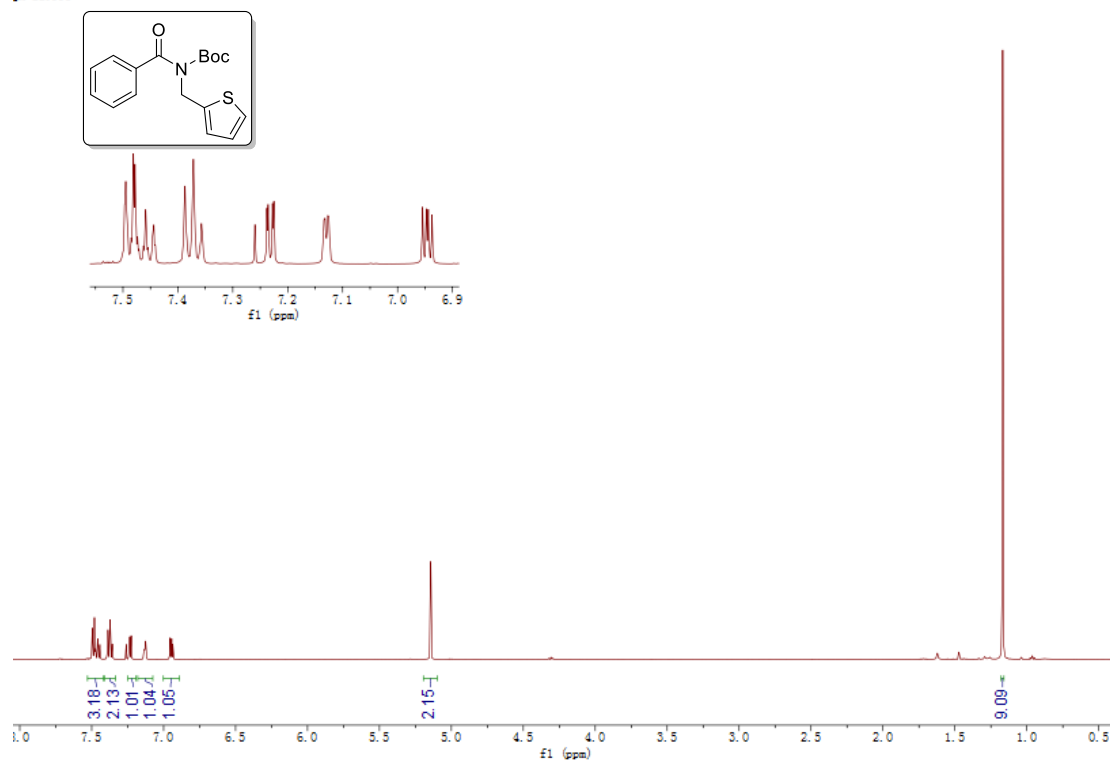

Supplementary Figure 20.  $^{13}\text{C}$  NMR Spectrum of 2k (125 MHz,  $\text{CDCl}_3$ )

JM-220331

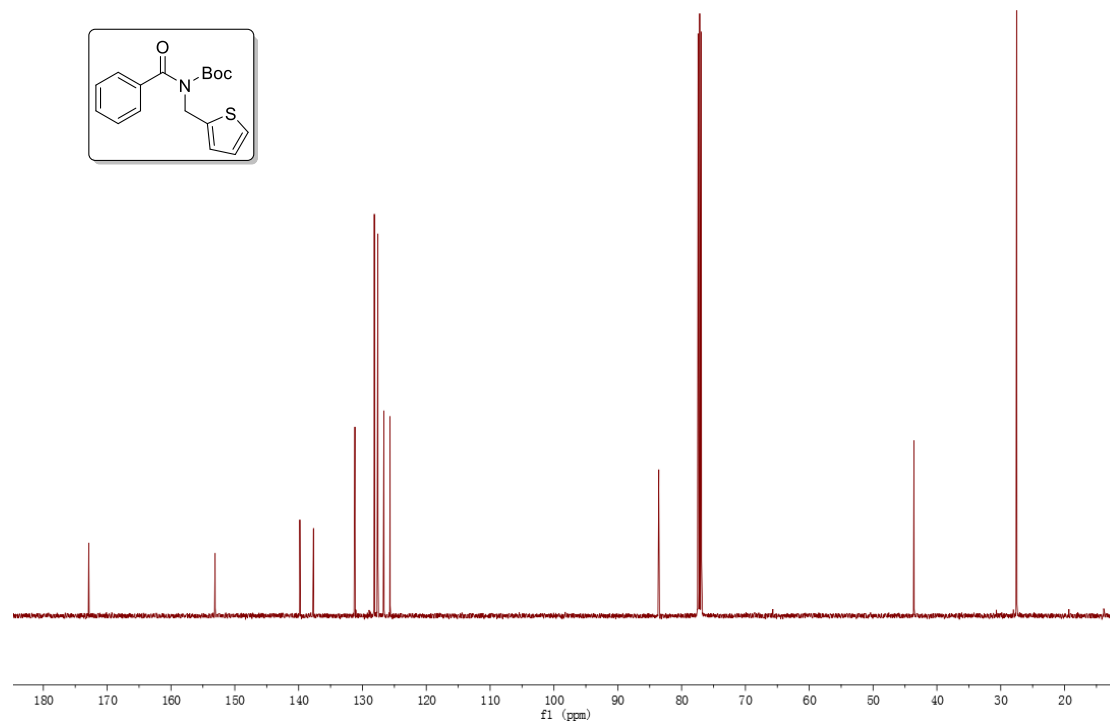

Supplementary Figure 21. <sup>1</sup>H NMR Spectrum of 2l (500 MHz, CDCl<sub>3</sub>)

JM-2203235

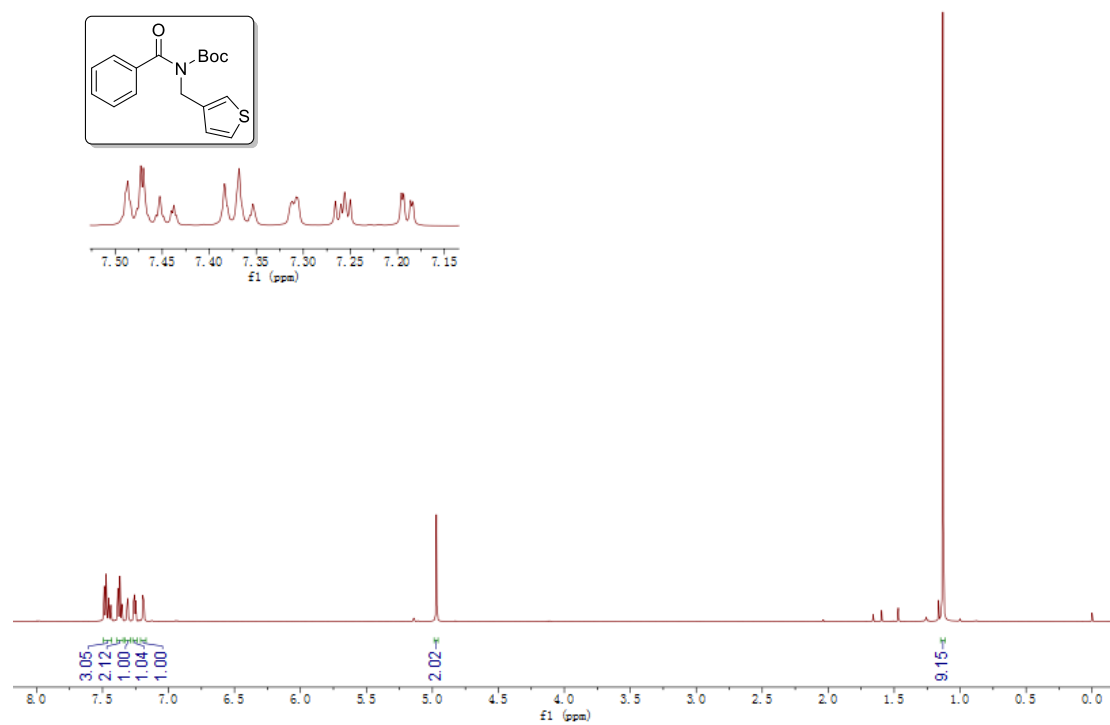

Supplementary Figure 22. <sup>13</sup>C NMR Spectrum of 2l (125 MHz, CDCl<sub>3</sub>)

JM-2203235

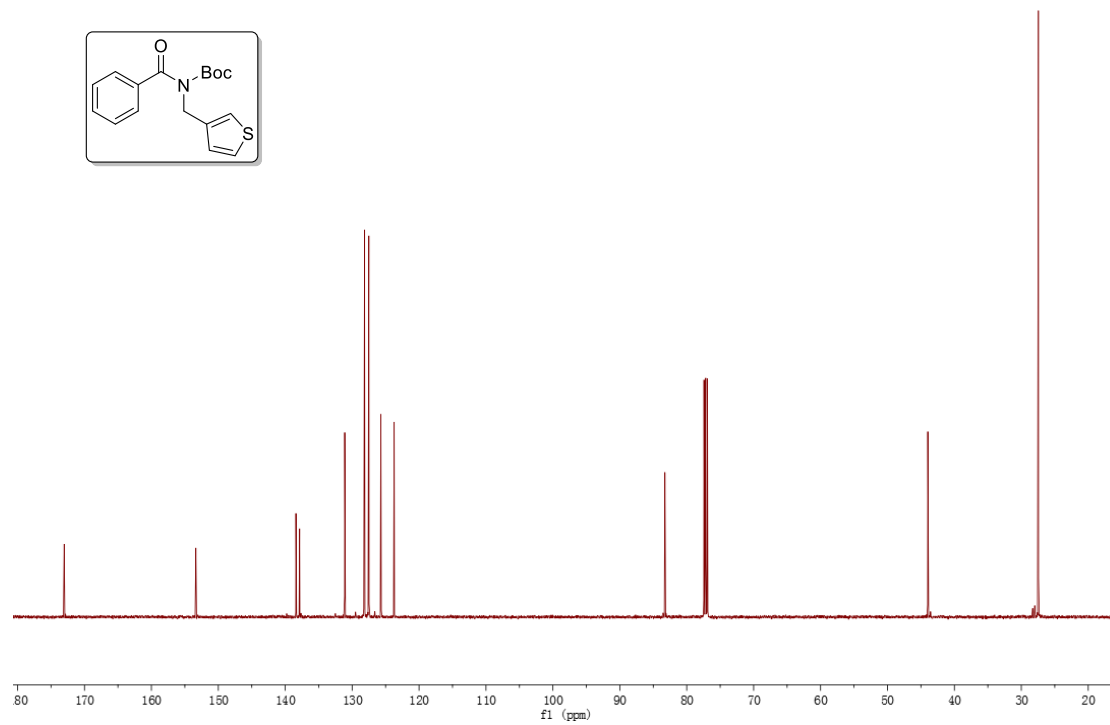

Supplementary Figure 23.  $^1\text{H}$  NMR Spectrum of 2m (500 MHz,  $\text{CDCl}_3$ )

SJ-2m

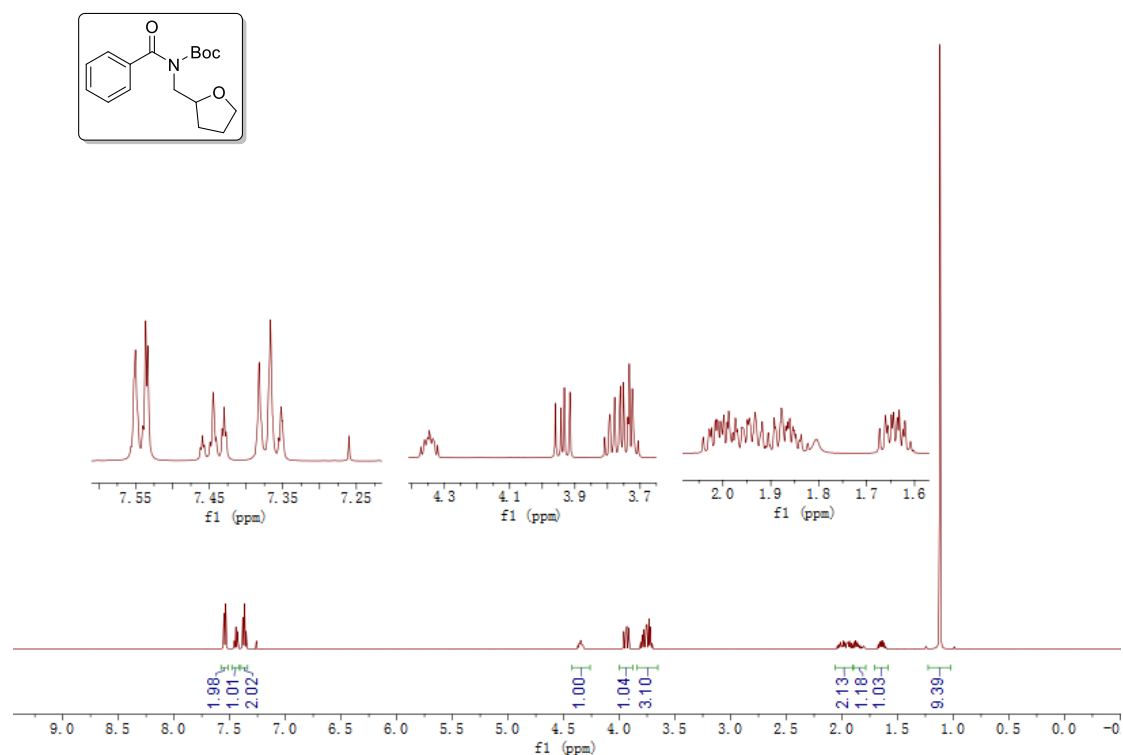

Supplementary Figure 24.  $^{13}\text{C}$  NMR Spectrum of 2m (125 MHz,  $\text{CDCl}_3$ )

SJ-2m 2. fid

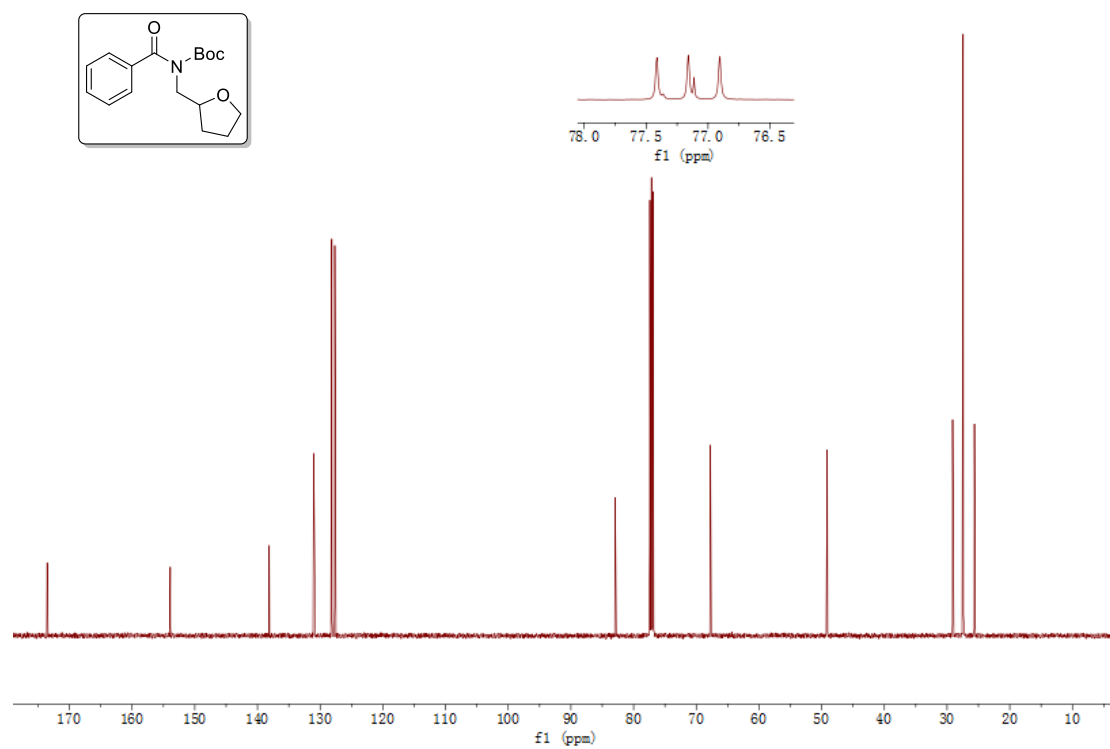



Supplementary Figure 25.  $^1\text{H}$  NMR Spectrum of 2p (500 MHz,  $\text{CDCl}_3$ )

JM-2204211.1.fid

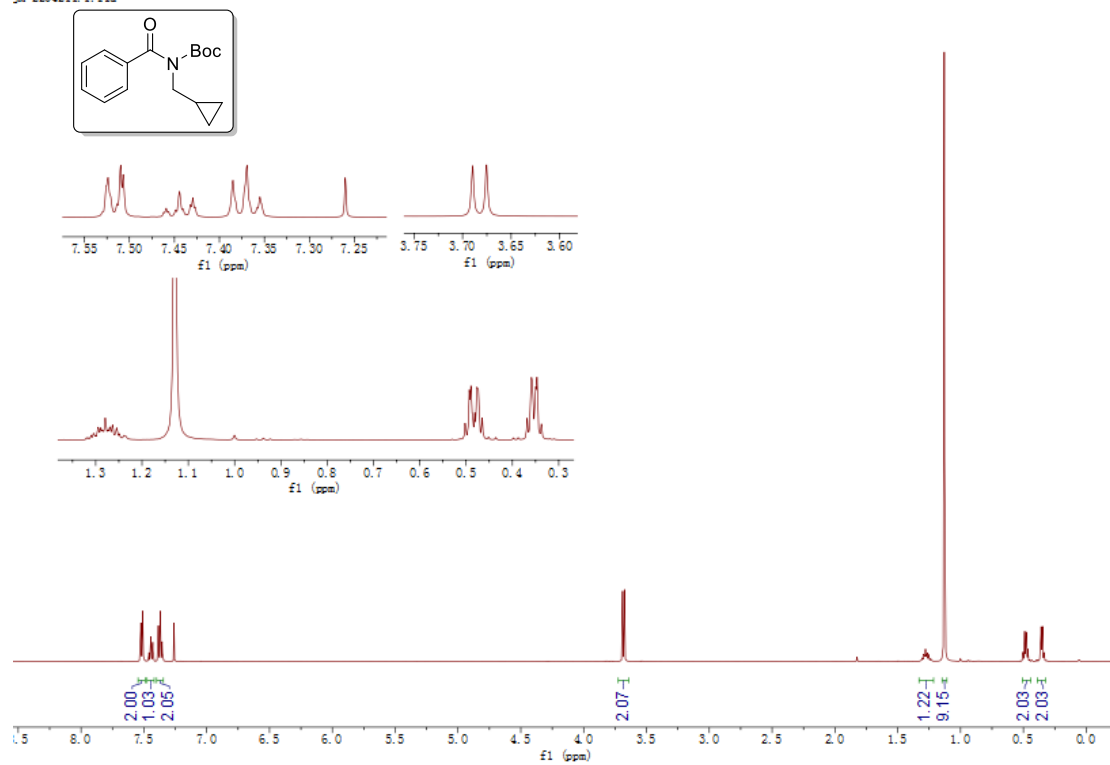

Supplementary Figure 26.  $^{13}\text{C}$  NMR Spectrum of 2p (125 MHz,  $\text{CDCl}_3$ )

JM-2203224

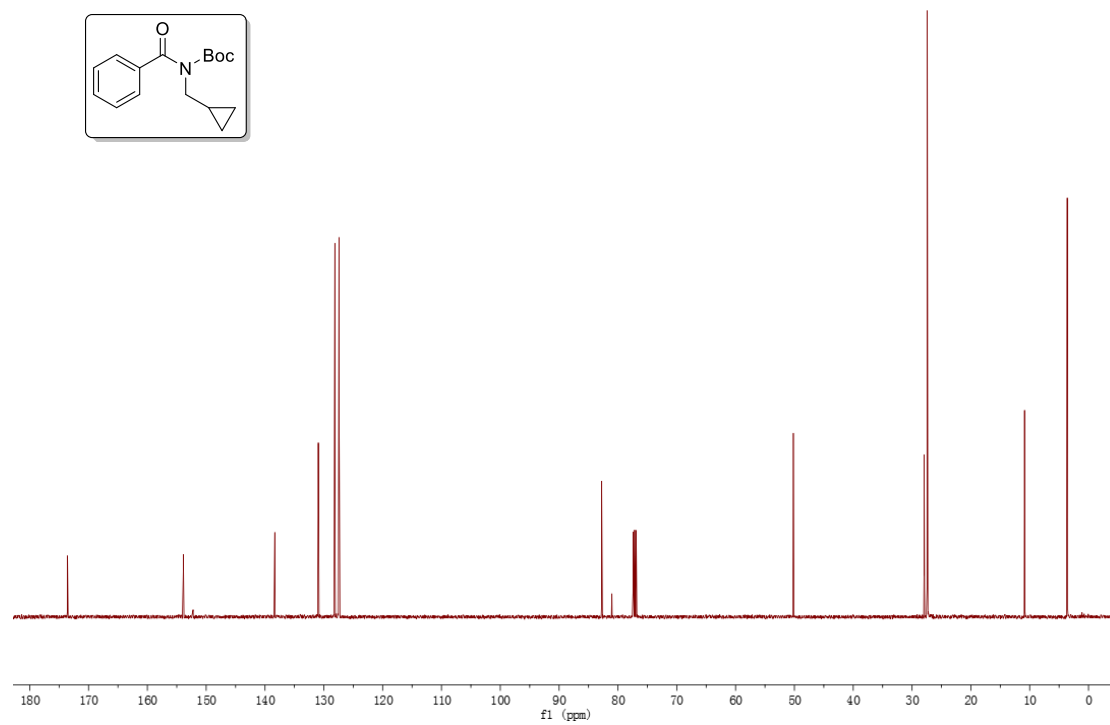

Supplementary Figure 27. <sup>1</sup>H NMR Spectrum of 2b' (500 MHz, CDCl<sub>3</sub>)

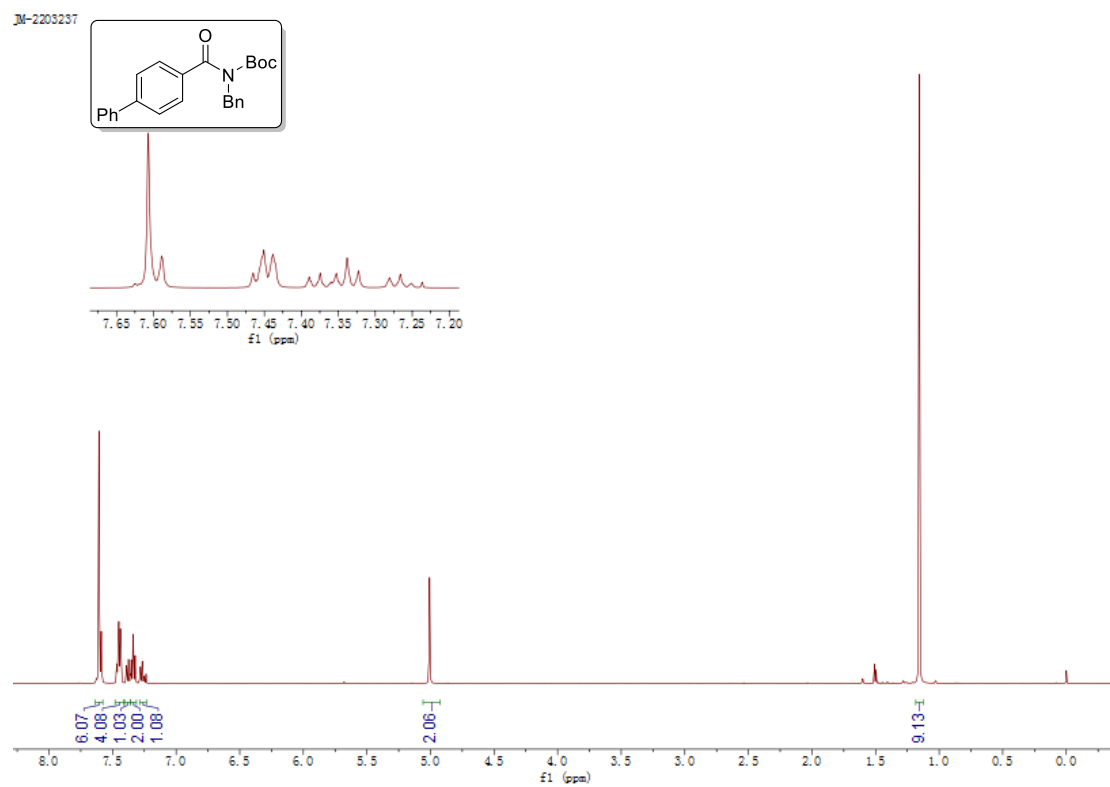

Supplementary Figure 28. <sup>1</sup>H NMR Spectrum of 2d' (500 MHz, CDCl<sub>3</sub>)

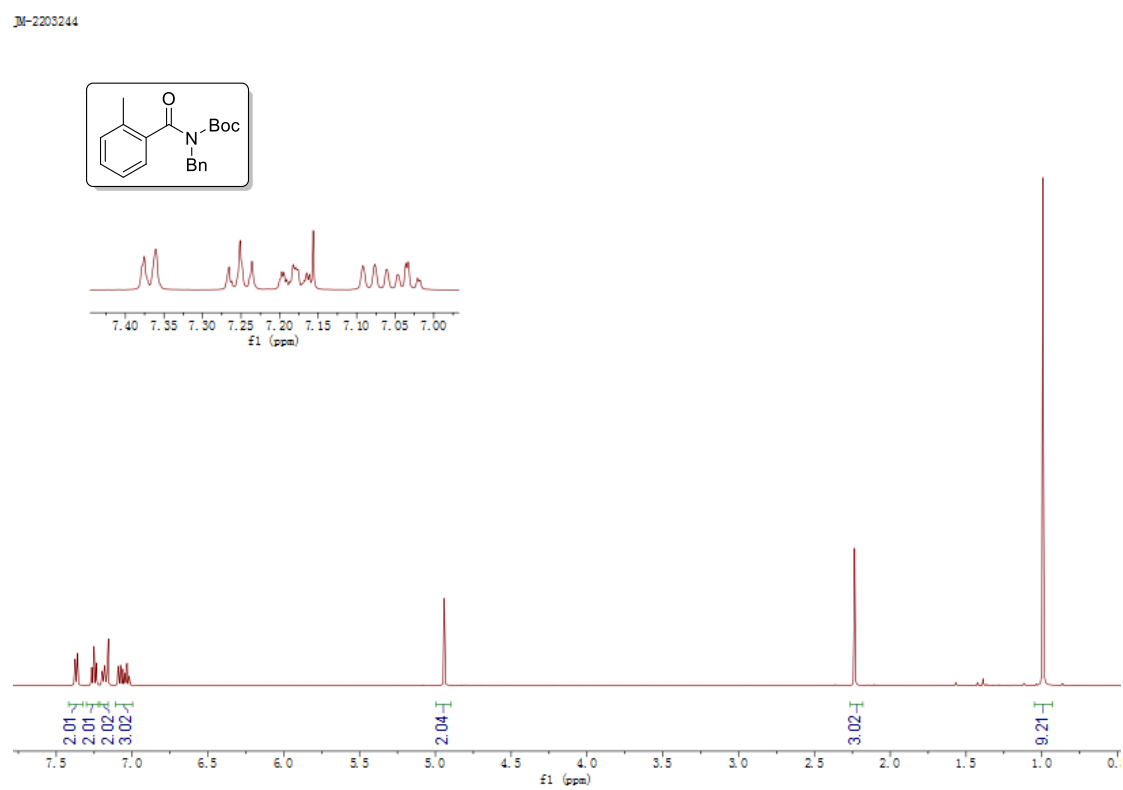

Supplementary Figure 29. <sup>1</sup>H NMR Spectrum of 2e' (500 MHz, CDCl<sub>3</sub>)

M-2203238

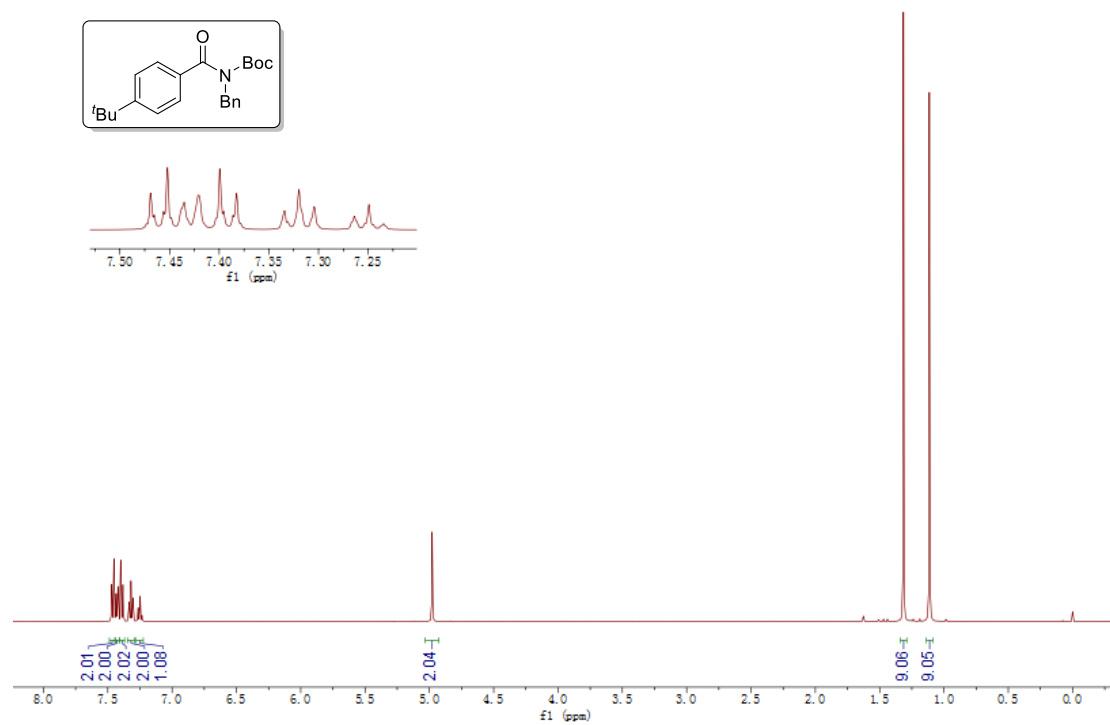

Supplementary Figure 30. <sup>1</sup>H NMR Spectrum of 2f' (500 MHz, CDCl<sub>3</sub>)

M-2203242

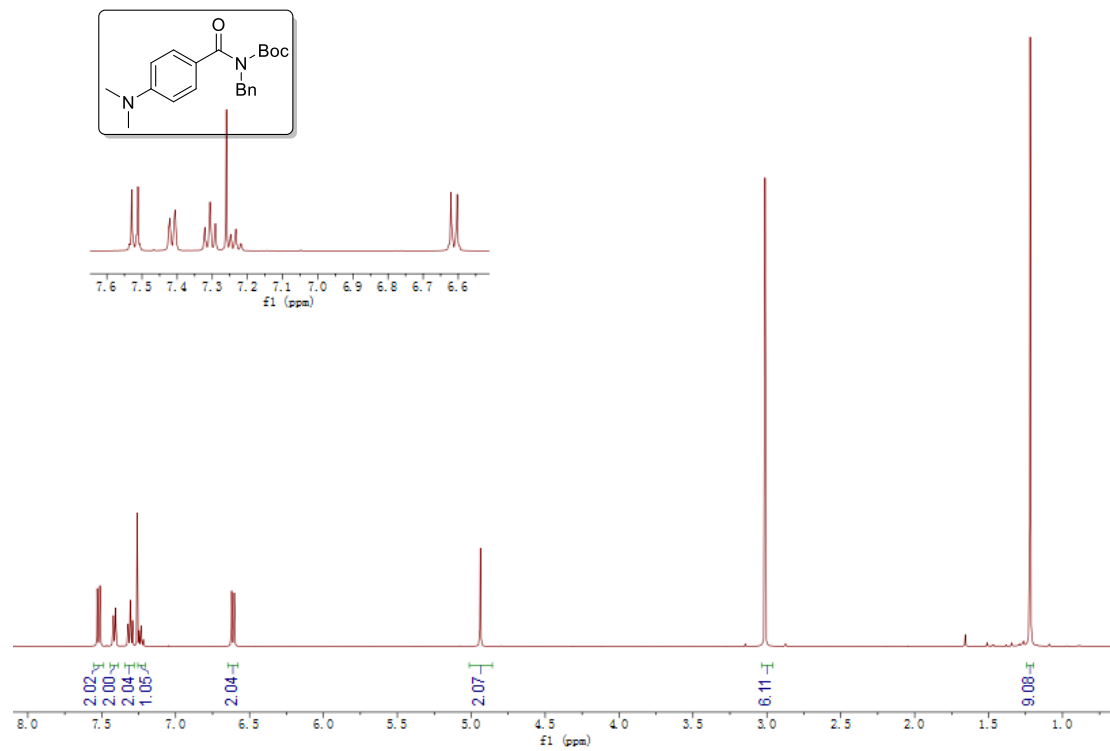

Supplementary Figure 31. <sup>1</sup>H NMR Spectrum of 2g' (500 MHz, CDCl<sub>3</sub>)

M-2203243

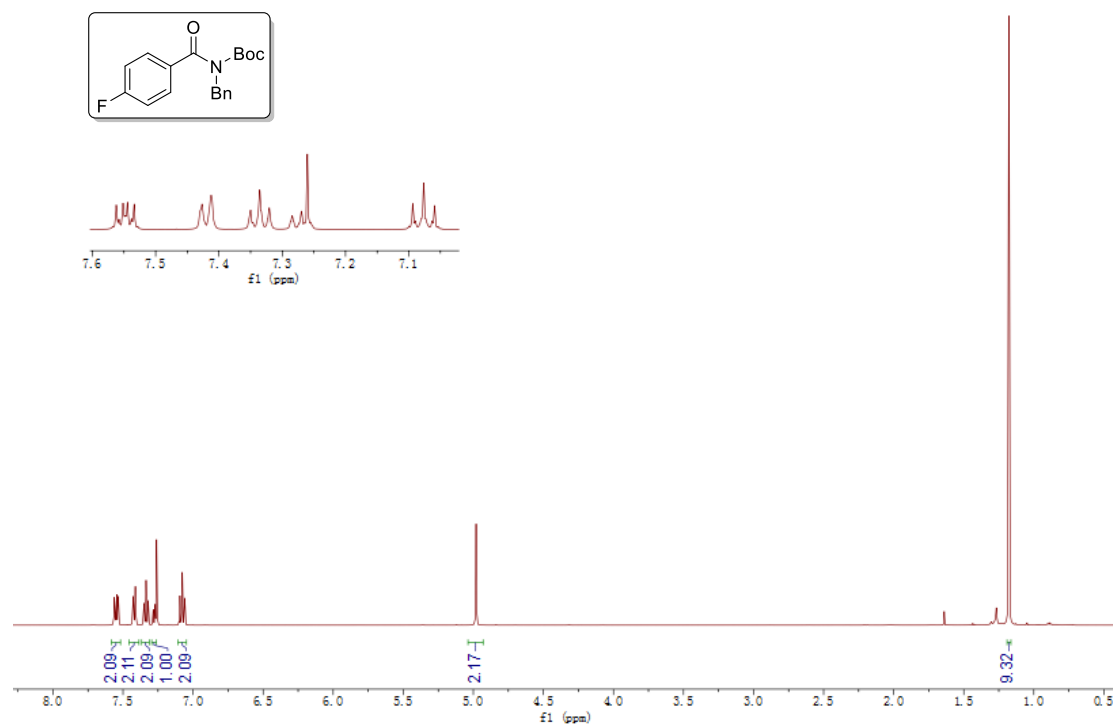

Supplementary Figure 32. <sup>1</sup>H NMR Spectrum of 2h' (500 MHz, CDCl<sub>3</sub>)

M-2203214

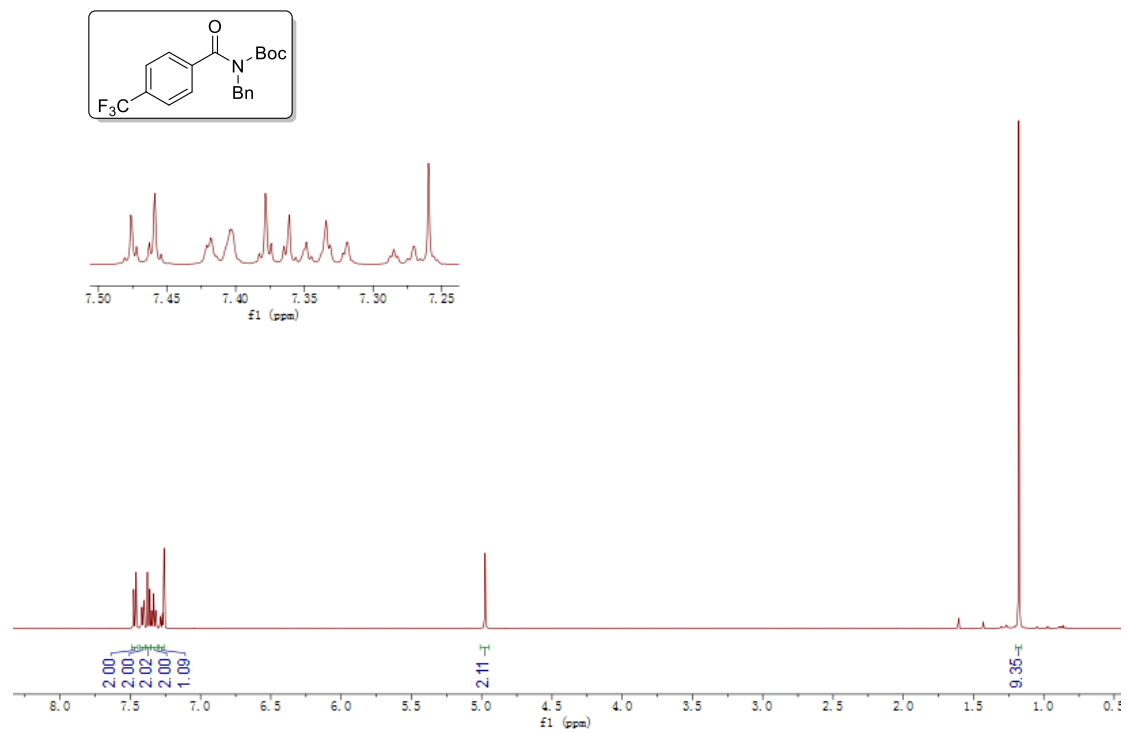

Supplementary Figure 33. <sup>1</sup>H NMR Spectrum of 2i' (500 MHz, CDCl<sub>3</sub>)

M-2203225

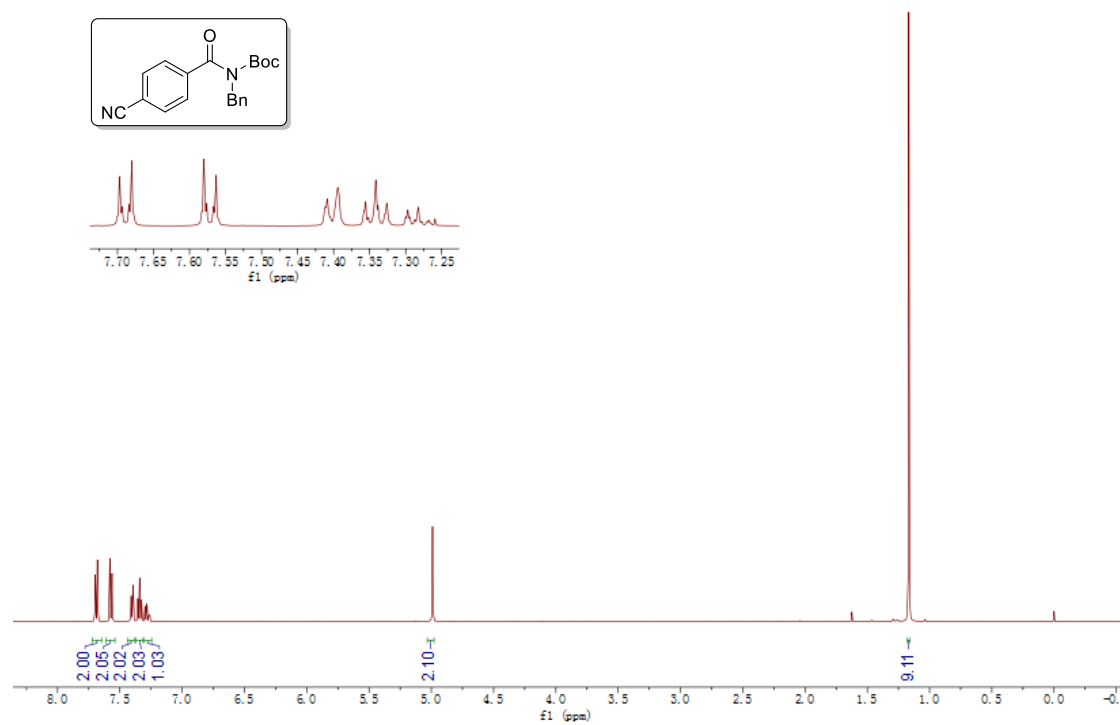

Supplementary Figure 34. <sup>1</sup>H NMR Spectrum of 2j' (500 MHz, CDCl<sub>3</sub>)

M-2203215

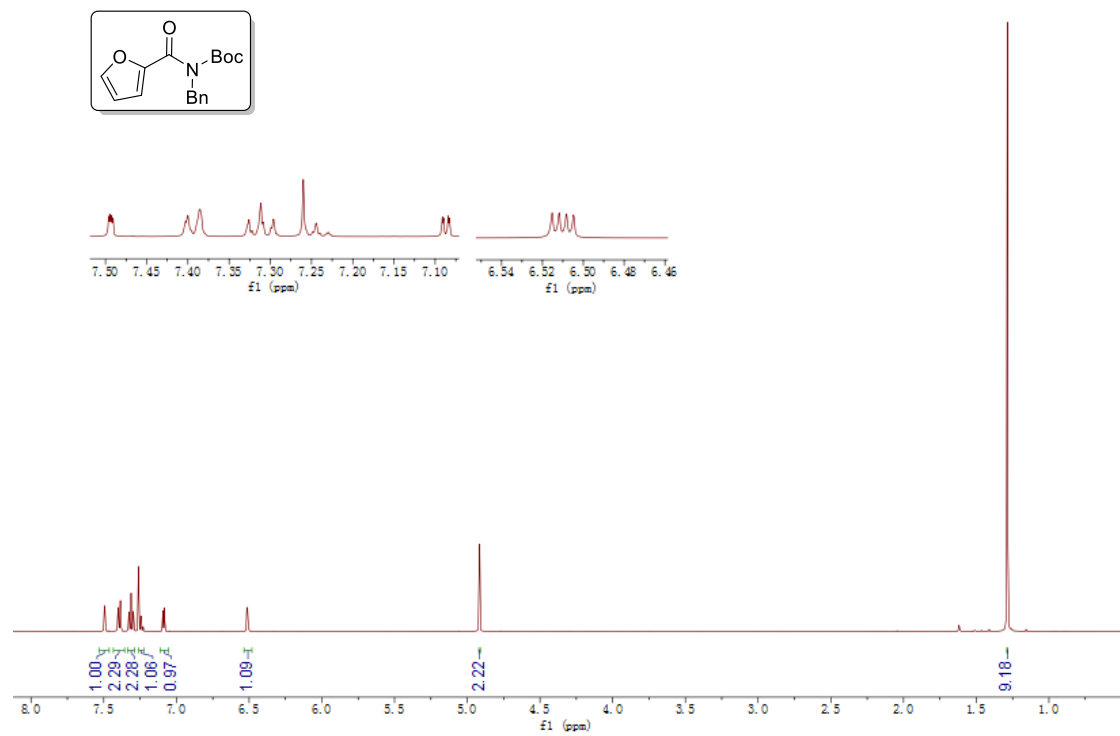

Supplementary Figure 35.  $^1\text{H}$  NMR Spectrum of 2k' (500 MHz,  $\text{CDCl}_3$ )

M-2203285

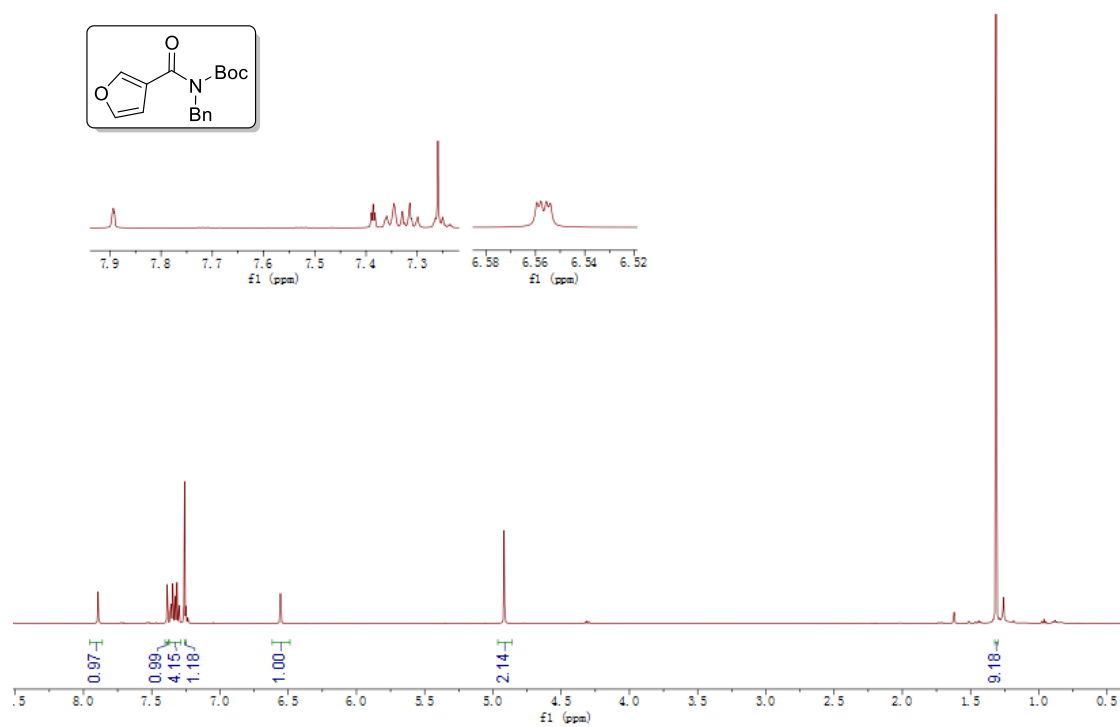

Supplementary Figure 36.  $^1\text{H}$  NMR Spectrum of 2l' (500 MHz,  $\text{CDCl}_3$ )

M-2203216

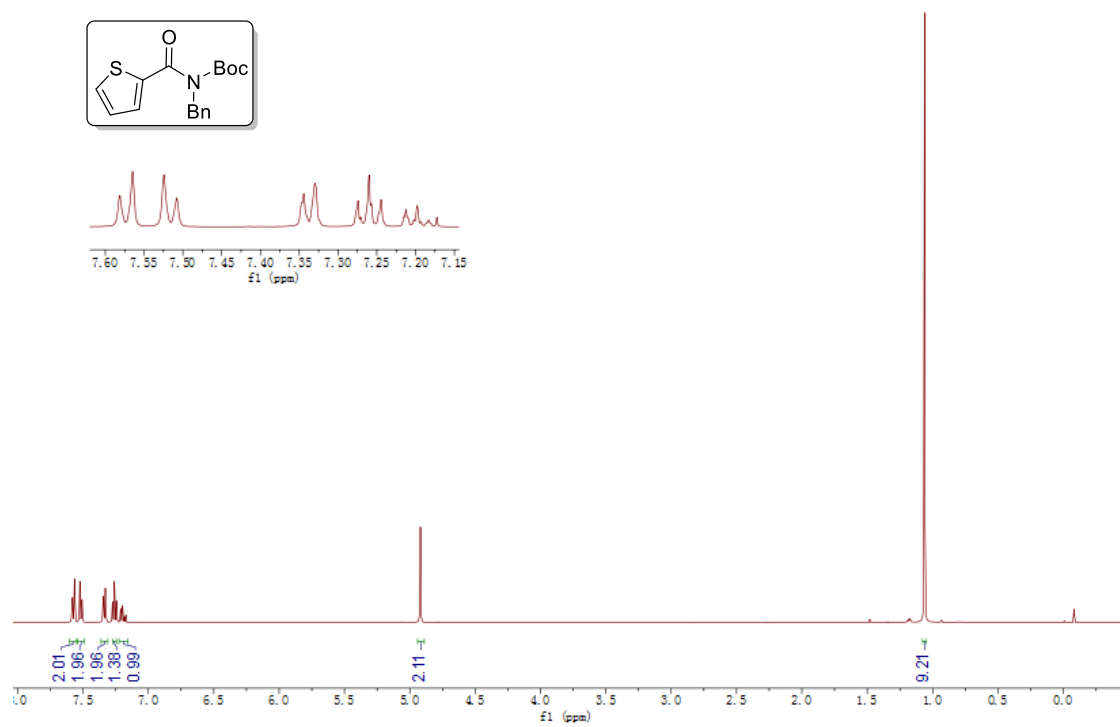

Supplementary Figure 37. <sup>1</sup>H NMR Spectrum of 3aa (500 MHz, DMSO-d<sub>6</sub>)

JM-2207281

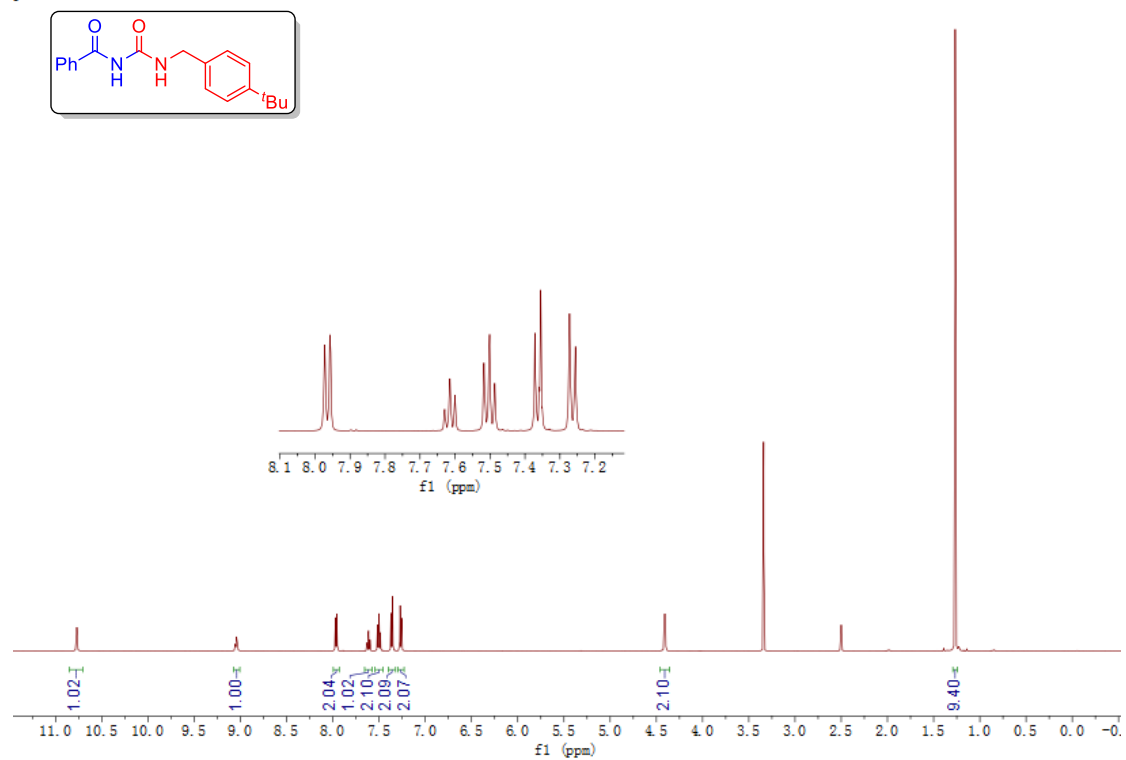

Supplementary Figure 38. <sup>13</sup>C NMR Spectrum of 3aa (125 MHz, DMSO-d<sub>6</sub>)

JM-2207281

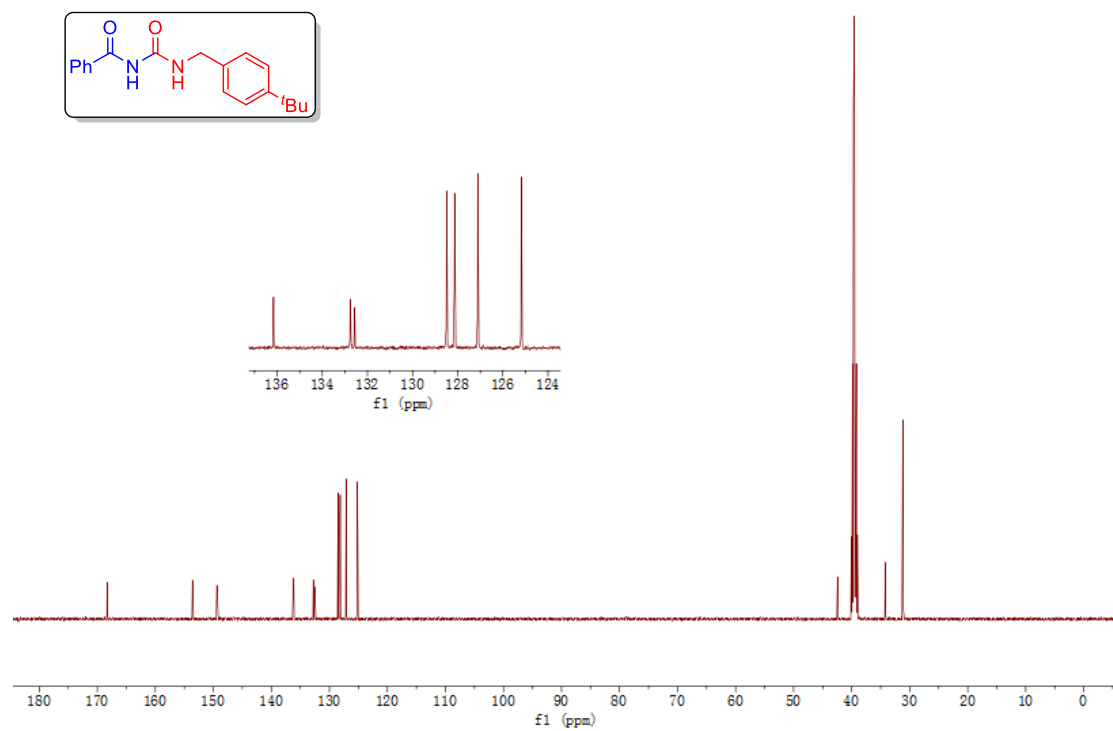

Supplementary Figure 39. <sup>1</sup>H NMR Spectrum of 3ab (500 MHz, DMSO-d<sub>6</sub>)

JM-A92

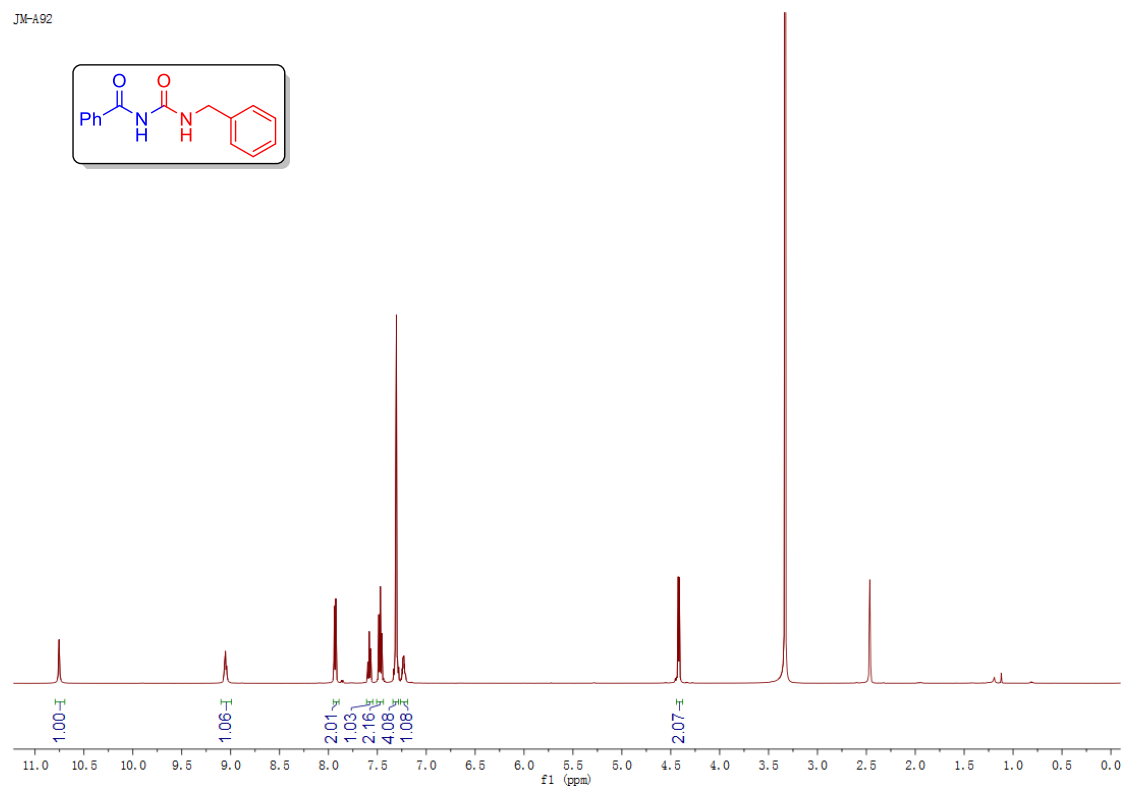

Supplementary Figure 40. <sup>1</sup>H NMR Spectrum of 3ac (500 MHz, CDCl<sub>3</sub>)

JM-A28

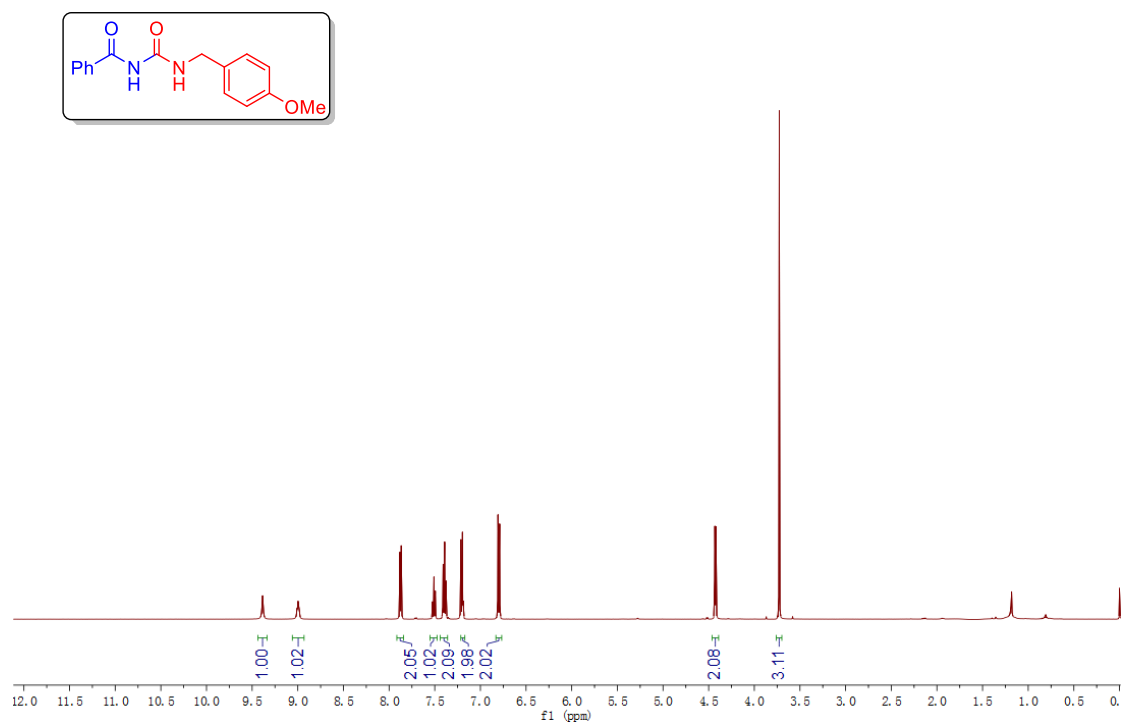



Supplementary Figure 41.  $^1\text{H}$  NMR Spectrum of 3ad (500 MHz,  $\text{DMSO-}d_6$ )

JM-A89

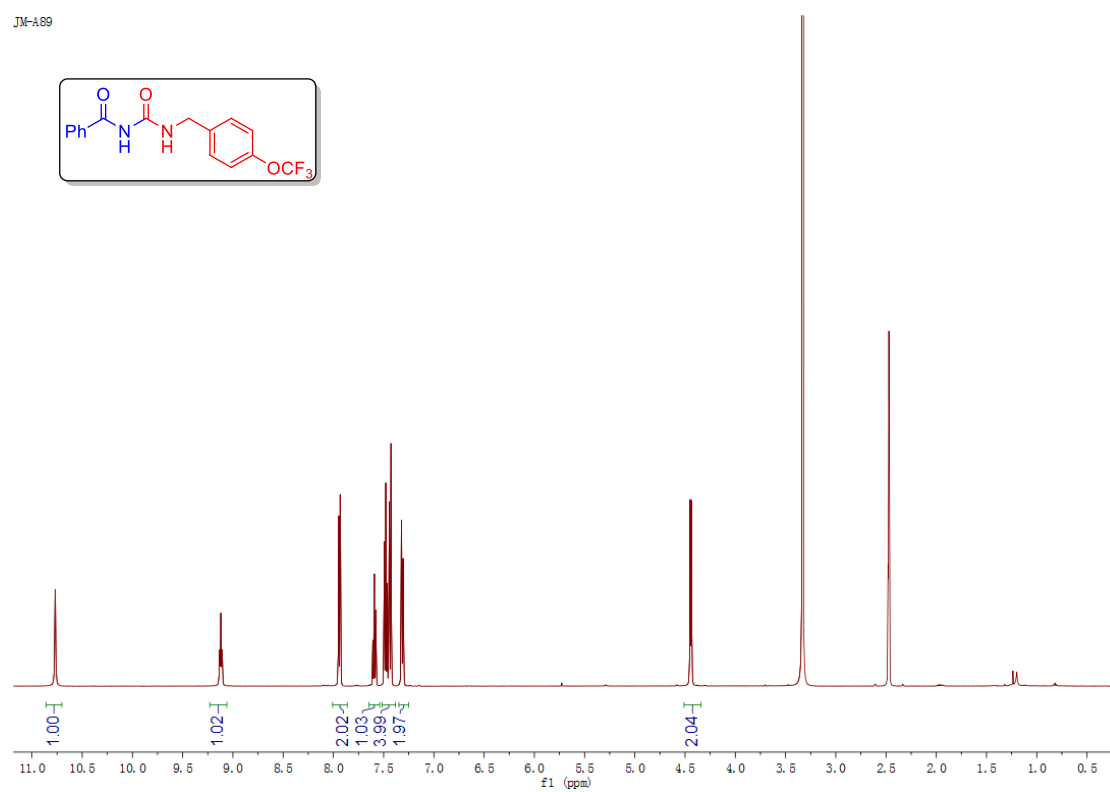

Supplementary Figure 42.  $^{13}\text{C}$  NMR Spectrum of 3ad (125 MHz,  $\text{DMSO-}d_6$ )

JM-A89

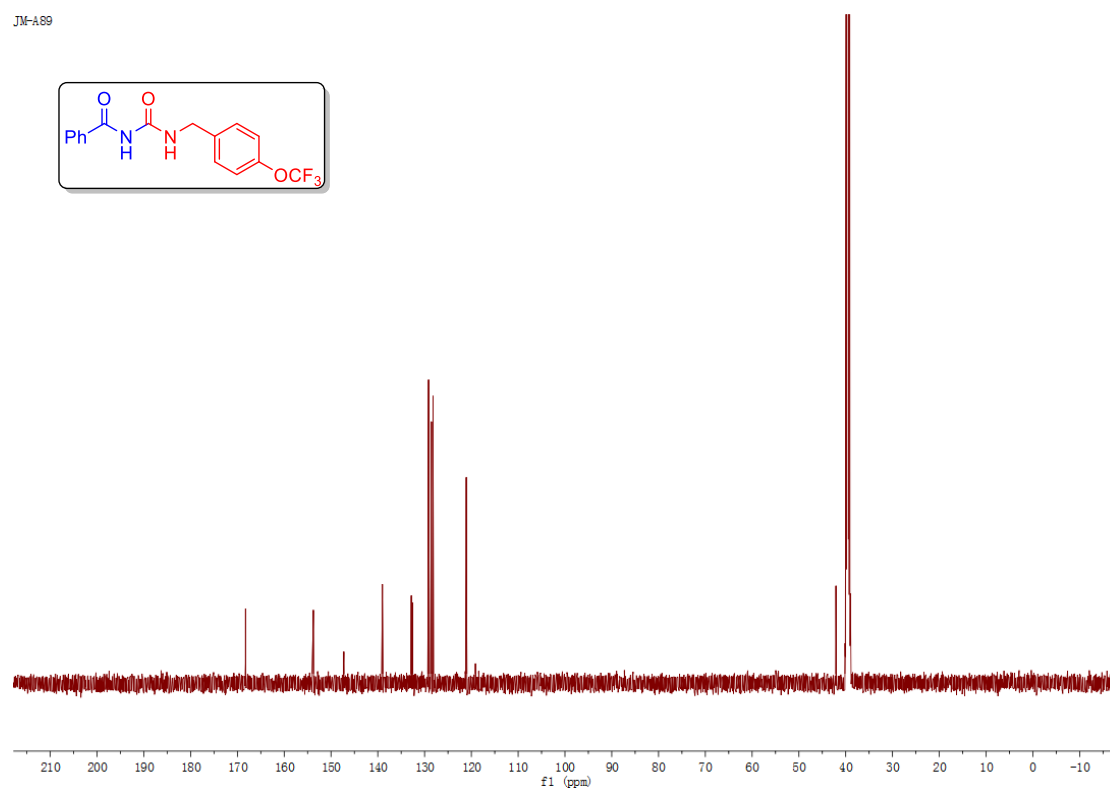

Supplementary Figure 43. <sup>1</sup>H NMR Spectrum of 3ae (500MHz, DMSO-*d*<sub>6</sub>)

JM-A133.1.fid

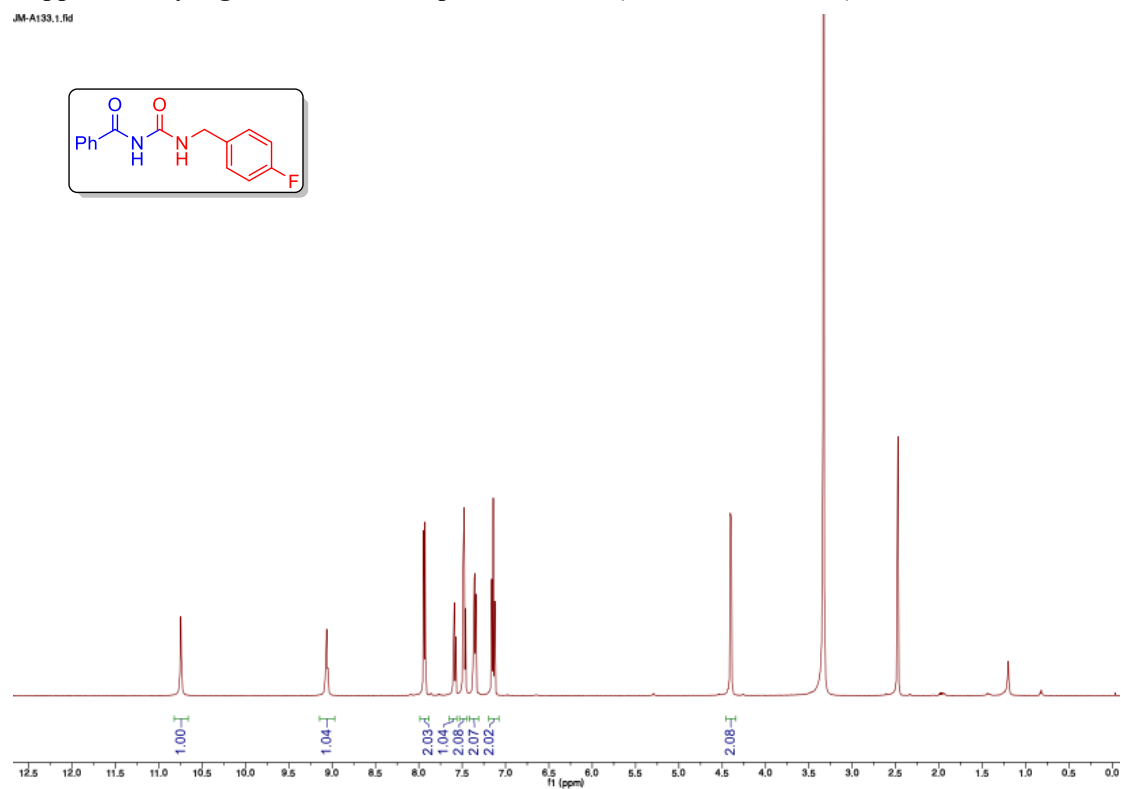

Supplementary Figure 44. <sup>13</sup>C NMR Spectrum of 3ae (125 MHz, DMSO-*d*<sub>6</sub>)

JM-A133.2.fid

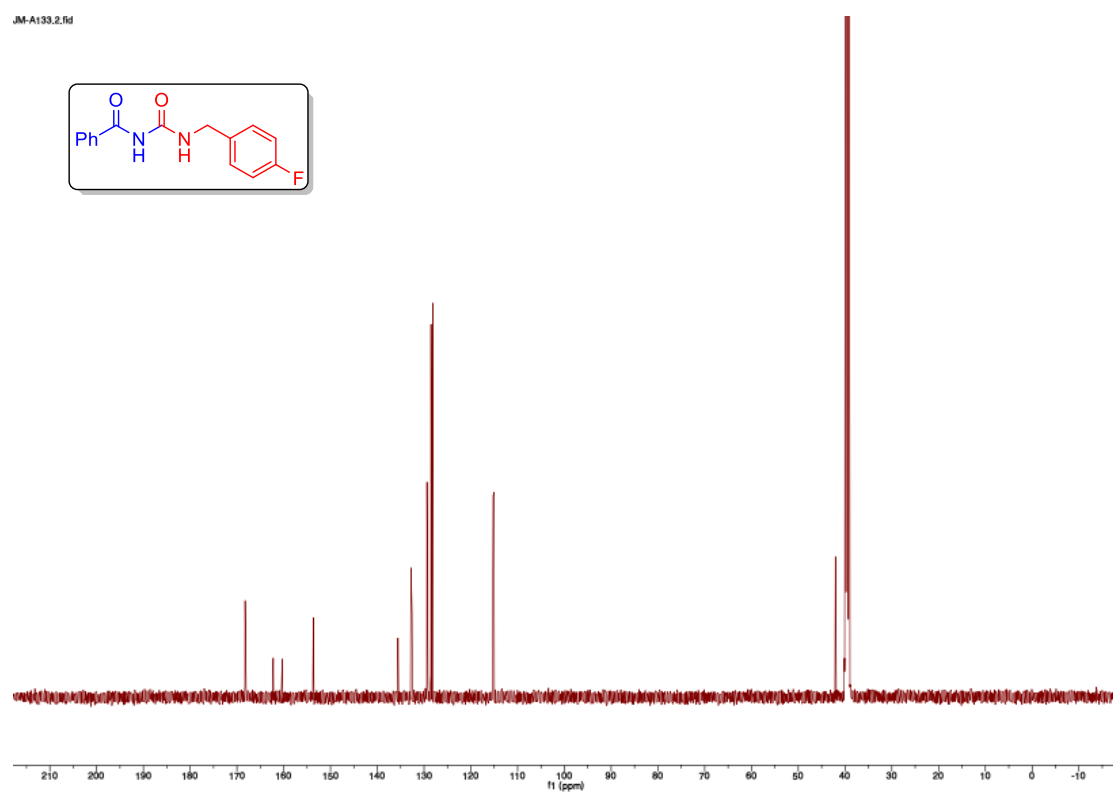

Supplementary Figure 45. <sup>1</sup>H NMR Spectrum of 3af (500MHz, DMSO-d<sub>6</sub>)

SJ-2208241. 1.fid

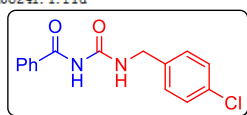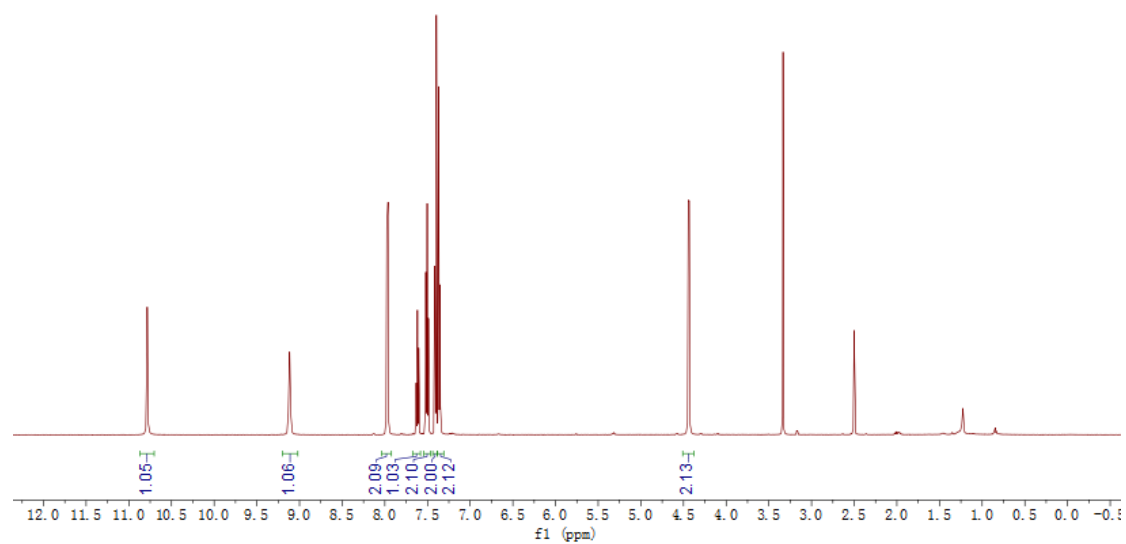

Supplementary Figure 46. <sup>13</sup>C NMR Spectrum of 3af (125 MHz, DMSO-d<sub>6</sub>)

SJ-2208241. 2.fid

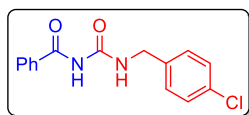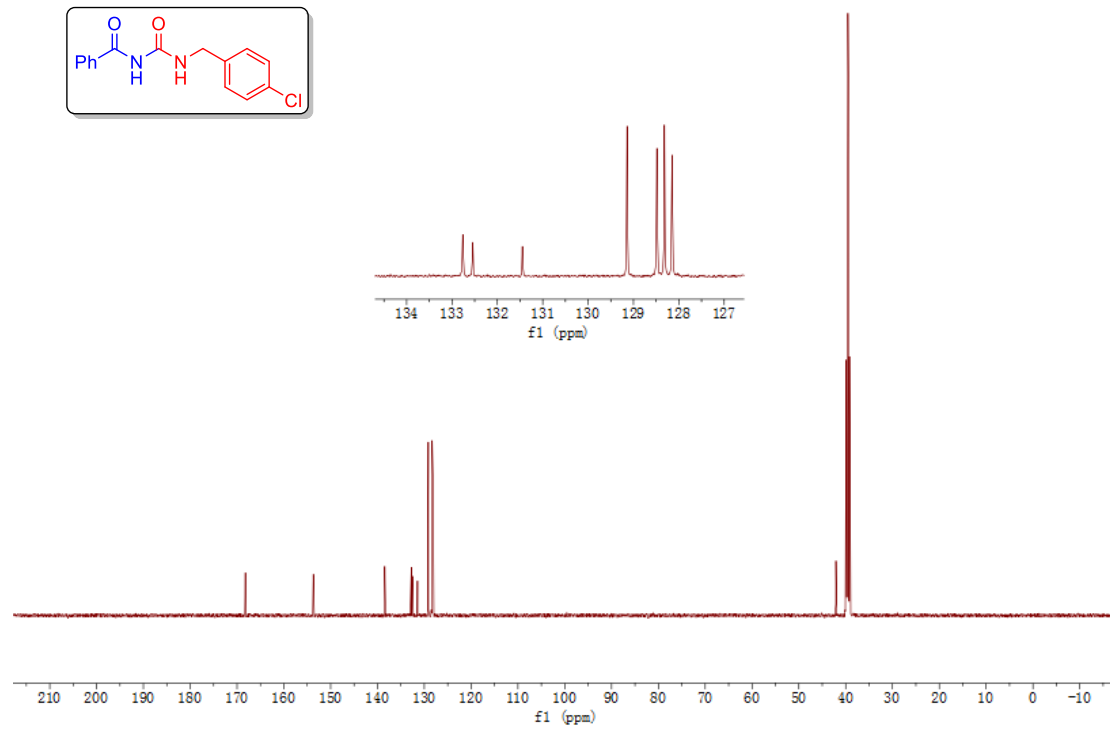

Supplementary Figure 47. <sup>1</sup>H NMR Spectrum of 3ag (500MHz, DMSO-d<sub>6</sub>)

JM-A101

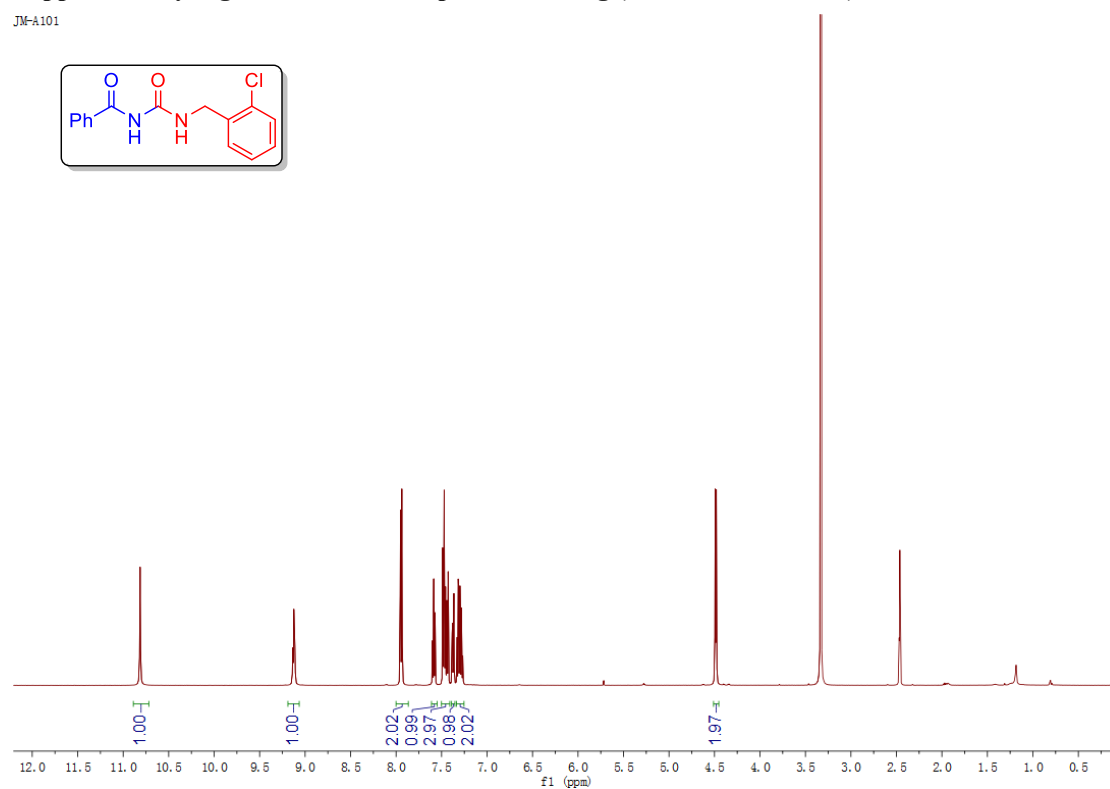

Supplementary Figure 48. <sup>13</sup>C NMR Spectrum of 3ag (125 MHz, DMSO-d<sub>6</sub>)

JM-A101

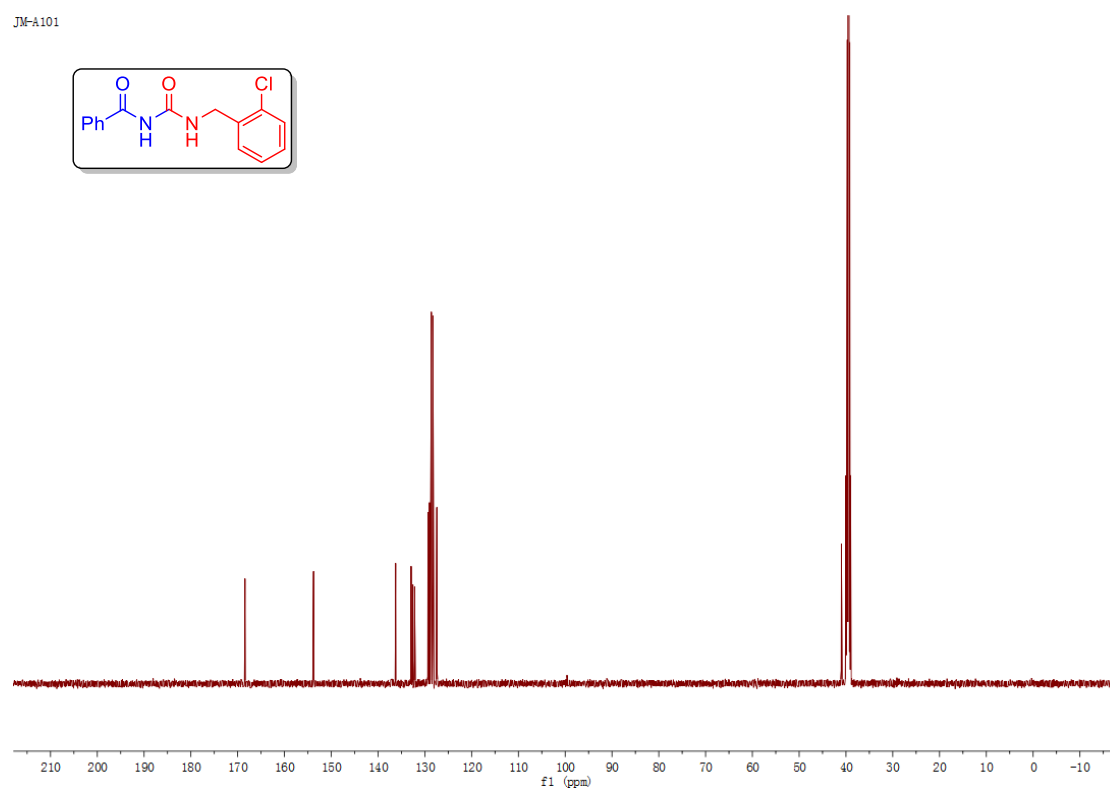

Supplementary Figure 49. <sup>1</sup>H NMR Spectrum of 3ah (500MHz, DMSO-d<sub>6</sub>)

JM-A99

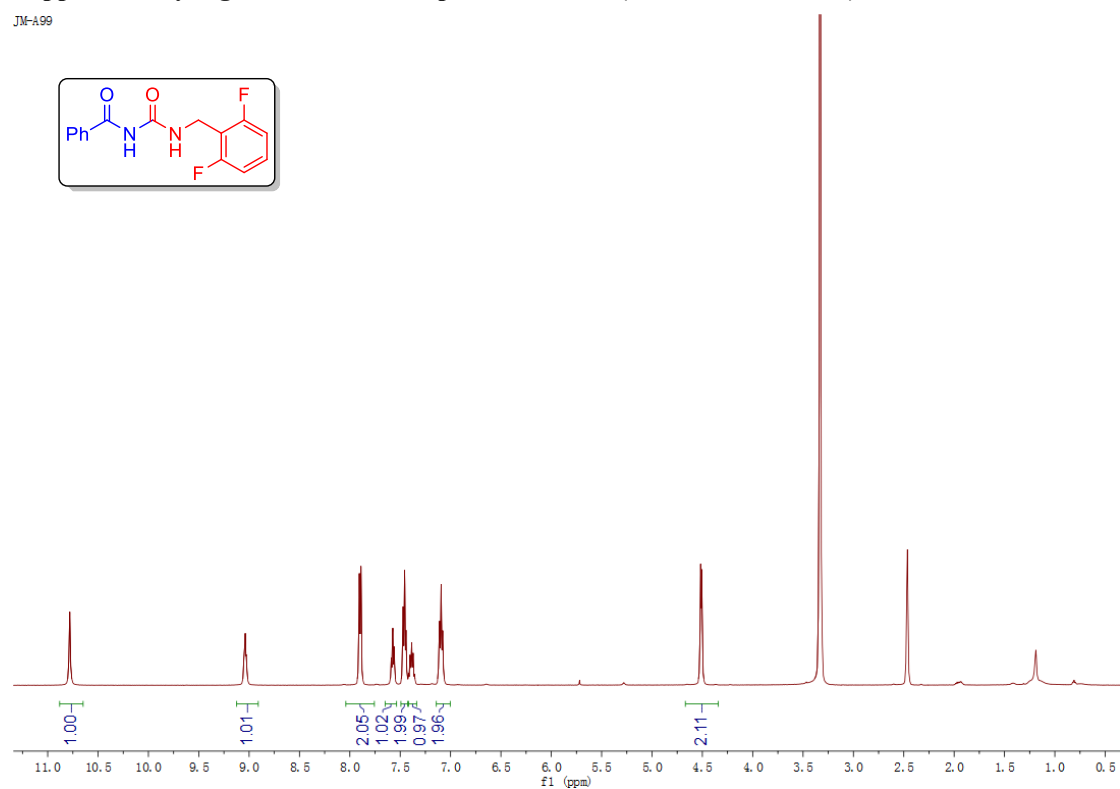

Supplementary Figure 50. <sup>13</sup>C NMR Spectrum of 3ah (125 MHz, DMSO-d<sub>6</sub>)

JM-A99

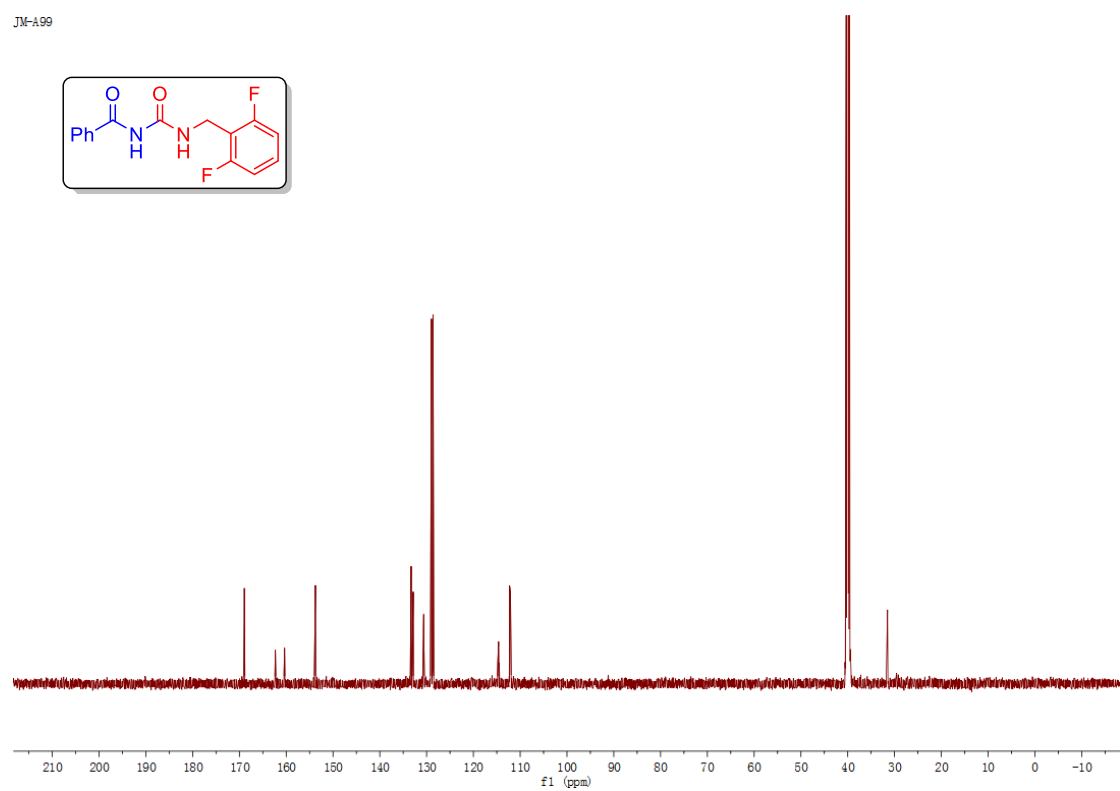

Supplementary Figure 51. <sup>1</sup>H NMR Spectrum of 3ai (500MHz, DMSO-d<sub>6</sub>)

JM-A98

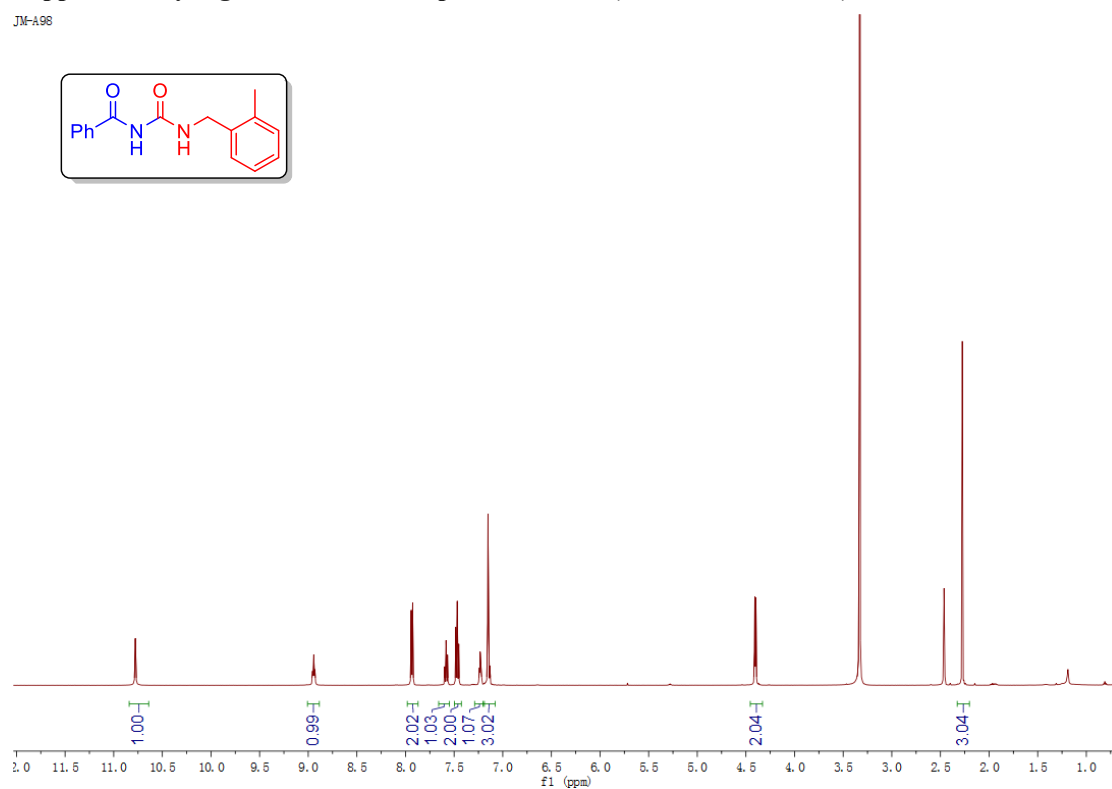

Supplementary Figure 52. <sup>13</sup>C NMR Spectrum of 3ai (125 MHz, DMSO-d<sub>6</sub>)

JM-A98

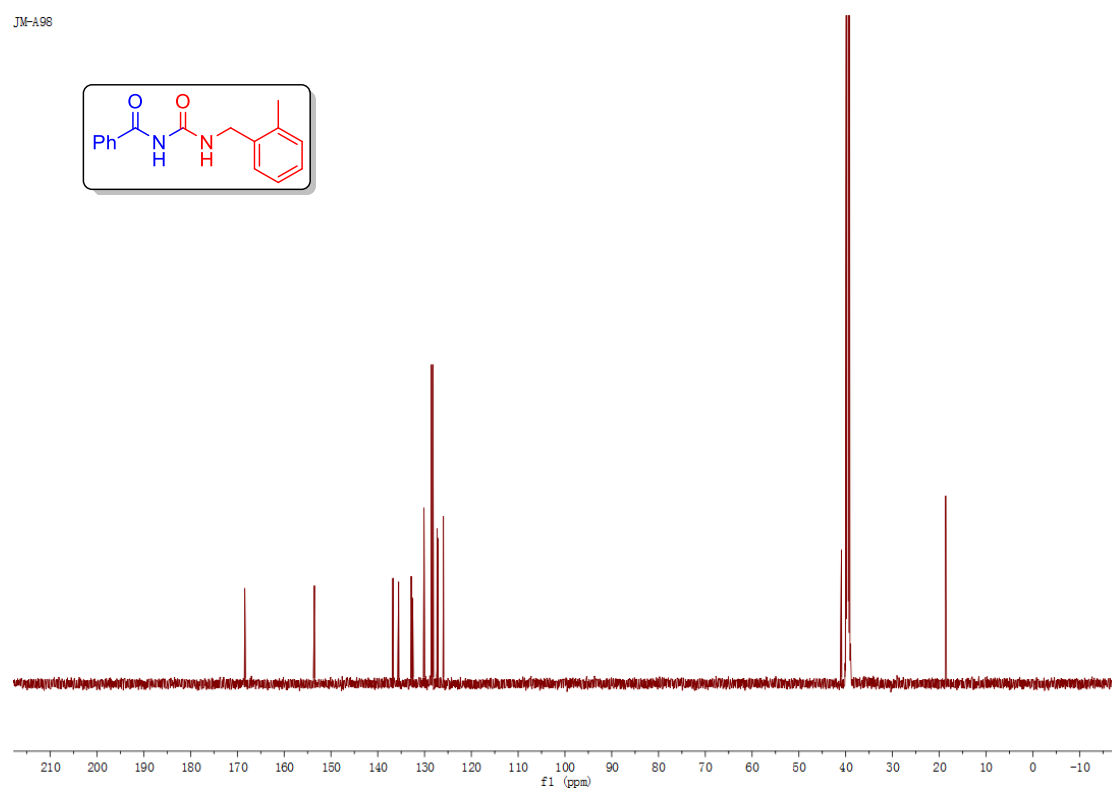

Supplementary Figure 53. <sup>1</sup>H NMR Spectrum of 3aj (500MHz, CDCl<sub>3</sub>)

SJ-2208242. 1.fid

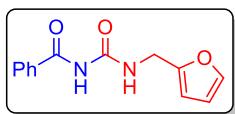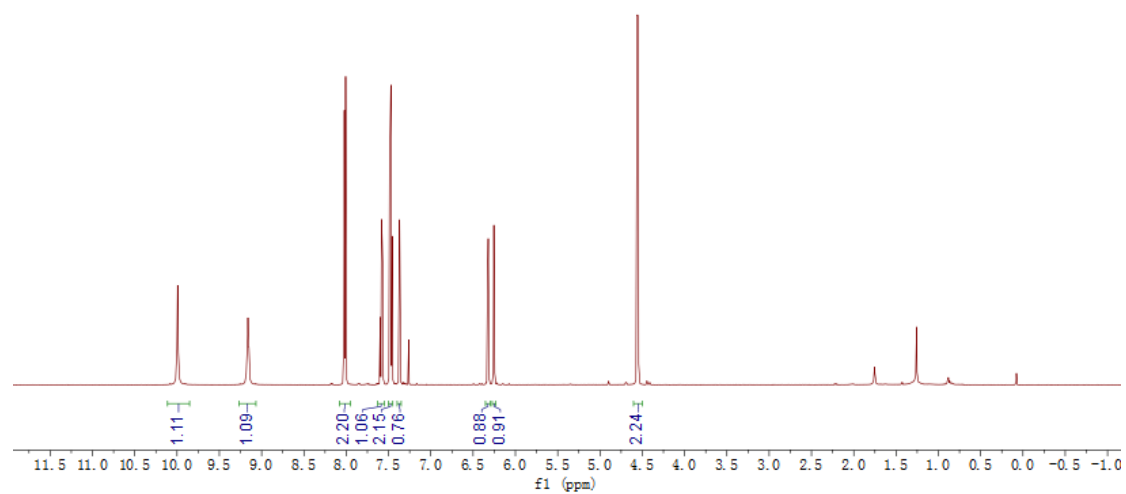

Supplementary Figure 54. <sup>13</sup>C NMR Spectrum of 3aj (125 MHz, CDCl<sub>3</sub>)

SJ-2208242. 2.fid

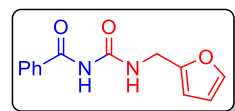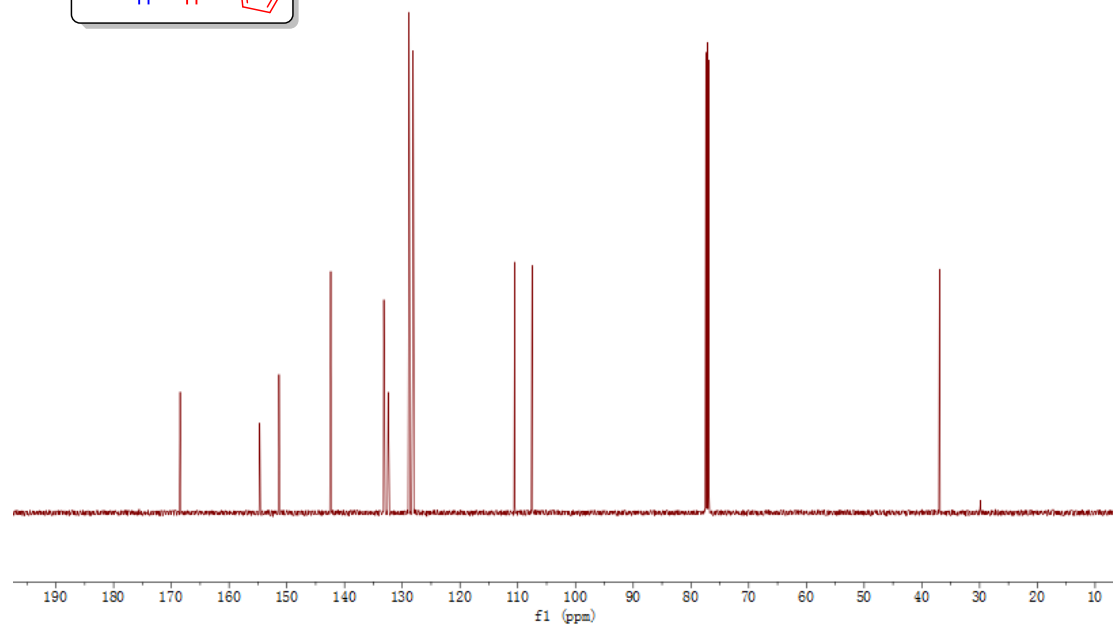

Supplementary Figure 55. <sup>1</sup>H NMR Spectrum of 3ak (500MHz, DMSO-d<sub>6</sub>)

JM-A100

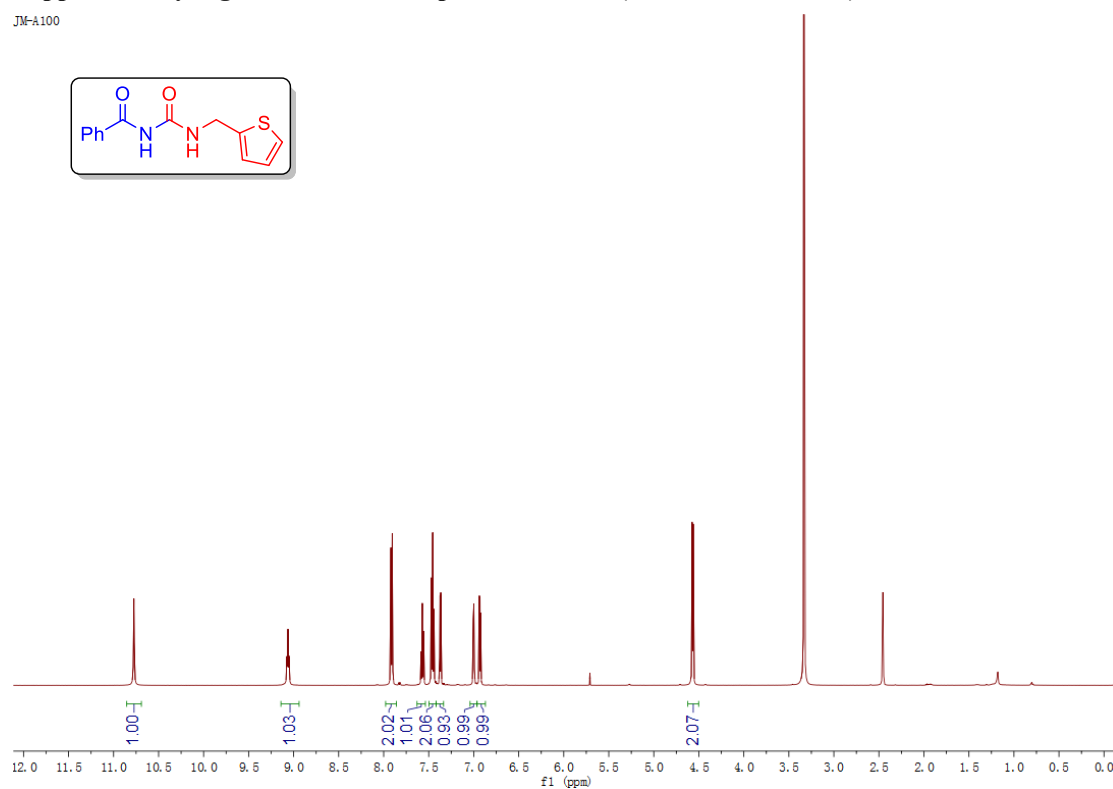

Supplementary Figure 56. <sup>13</sup>C NMR Spectrum of 3ak (125 MHz, DMSO-d<sub>6</sub>)

JM-A100

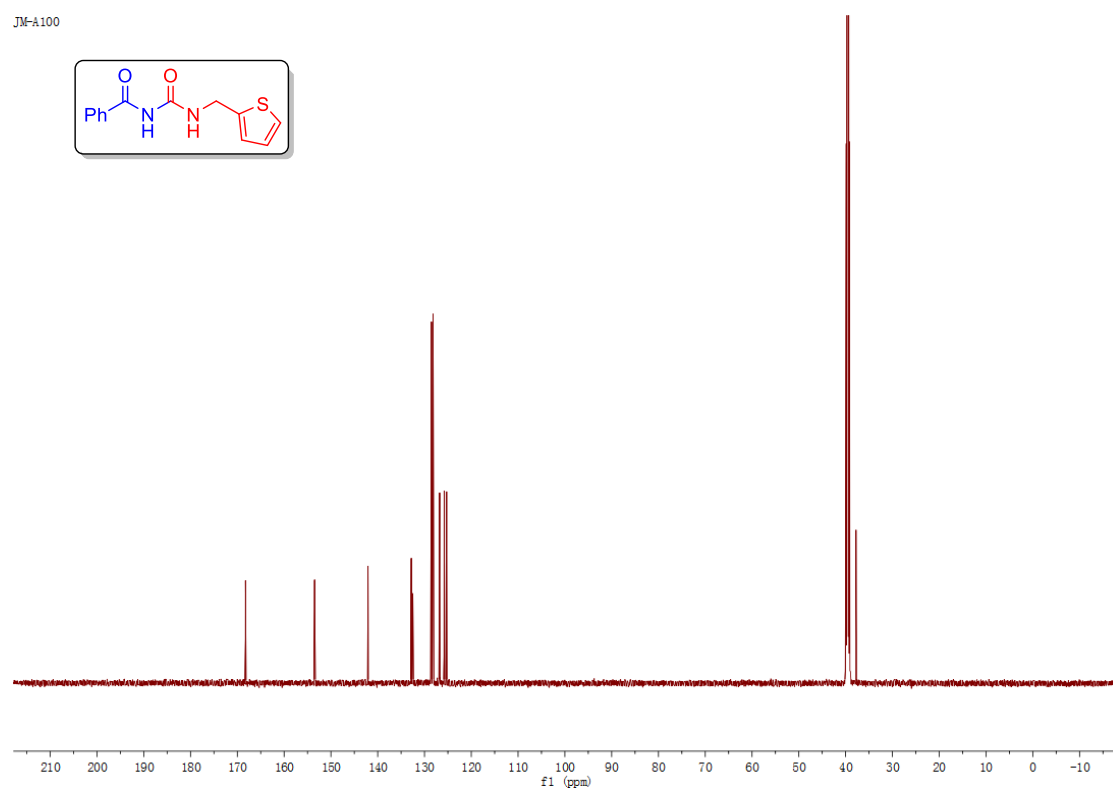



Supplementary Figure 57. <sup>1</sup>H NMR Spectrum of 3al (500MHz, DMSO-d<sub>6</sub>)

JM-A129

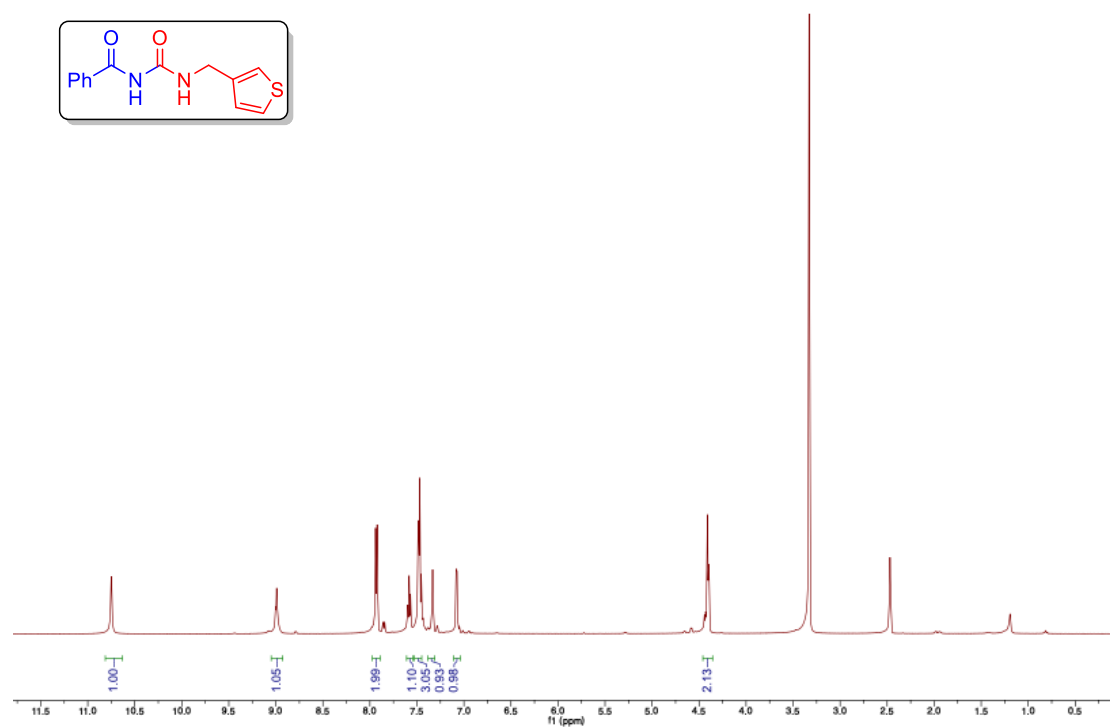

Supplementary Figure 58. <sup>13</sup>C NMR Spectrum of 3al (125 MHz, DMSO-d<sub>6</sub>)

JM-A129

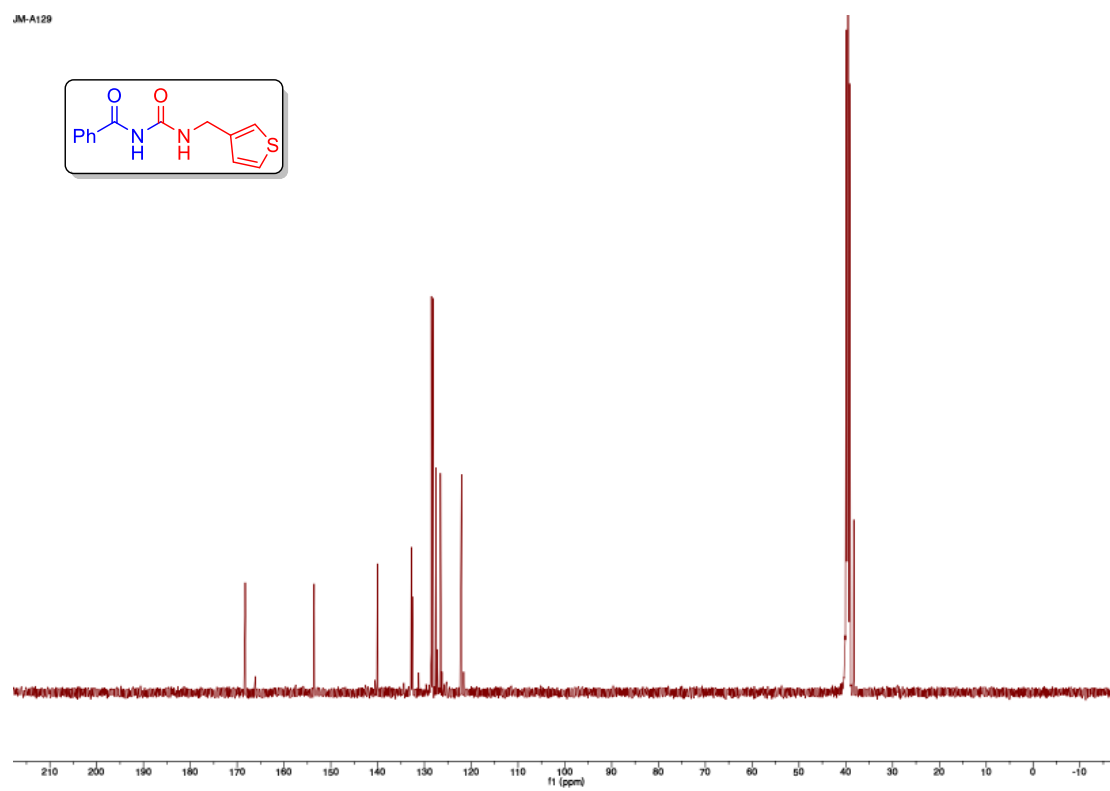

Supplementary Figure 59. <sup>1</sup>H NMR Spectrum of 3am (500MHz, DMSO-d<sub>6</sub>)

JM-A105

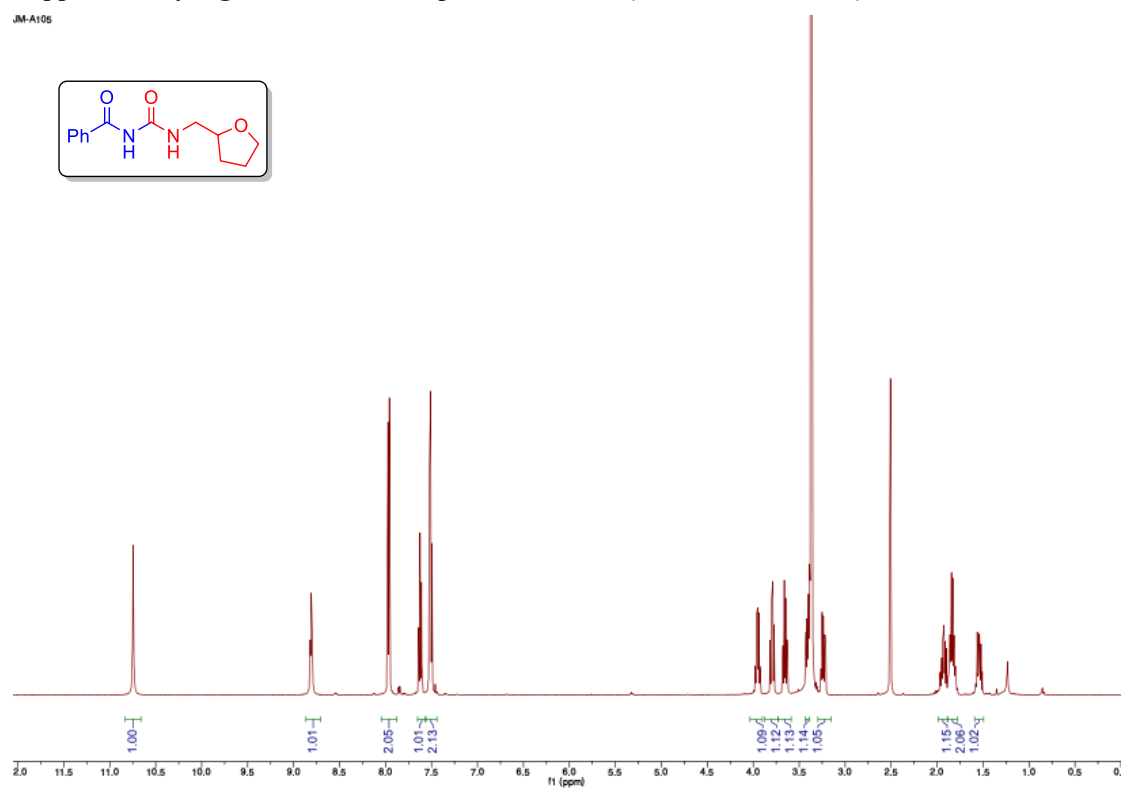

Supplementary Figure 60. <sup>13</sup>C NMR Spectrum of 3am (125 MHz, DMSO-d<sub>6</sub>)

JM-A105.2.fid

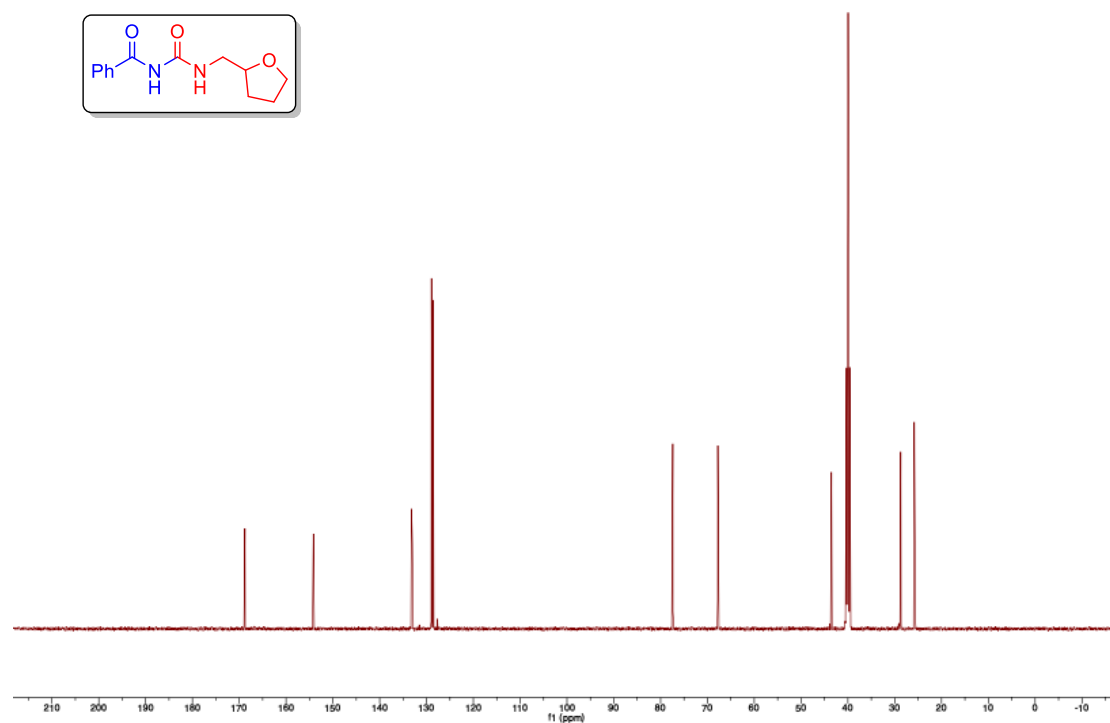

Supplementary Figure 61. <sup>1</sup>H NMR Spectrum of 3an (500MHz, DMSO-d<sub>6</sub>)

JM-A130

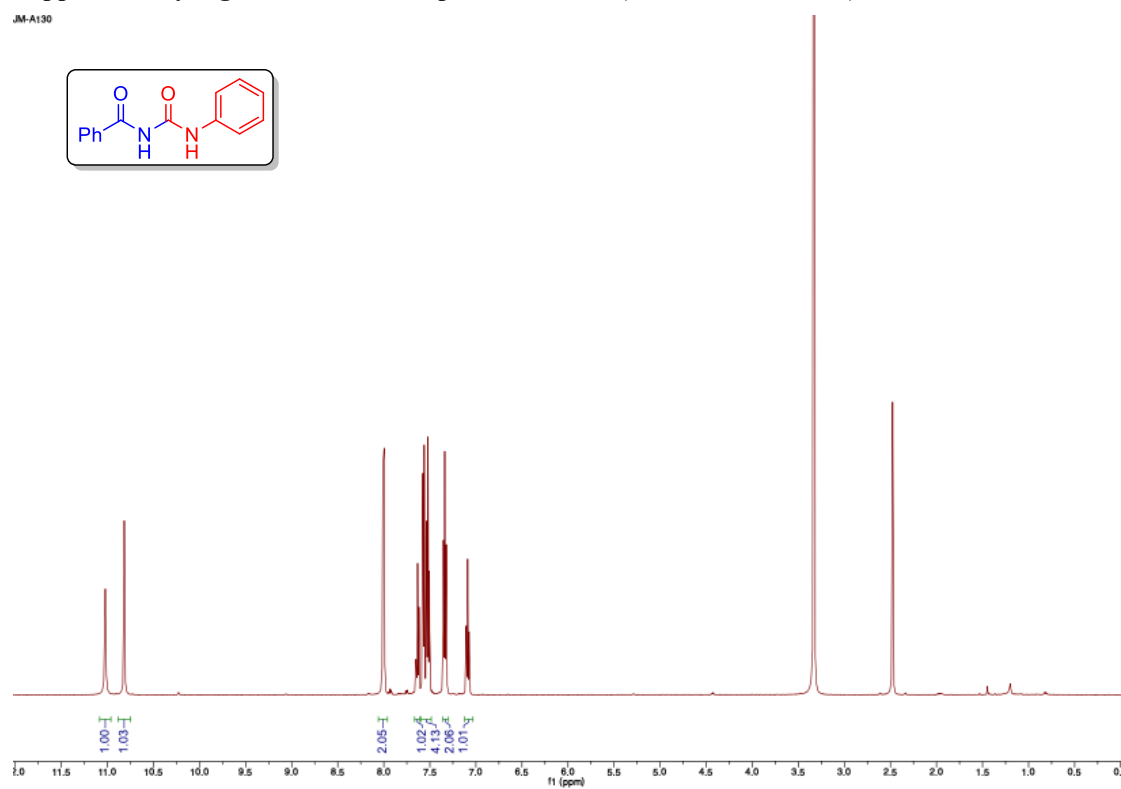

Supplementary Figure 62. <sup>1</sup>H NMR Spectrum of 3ao (500MHz, CDCl<sub>3</sub>)

JM-D13

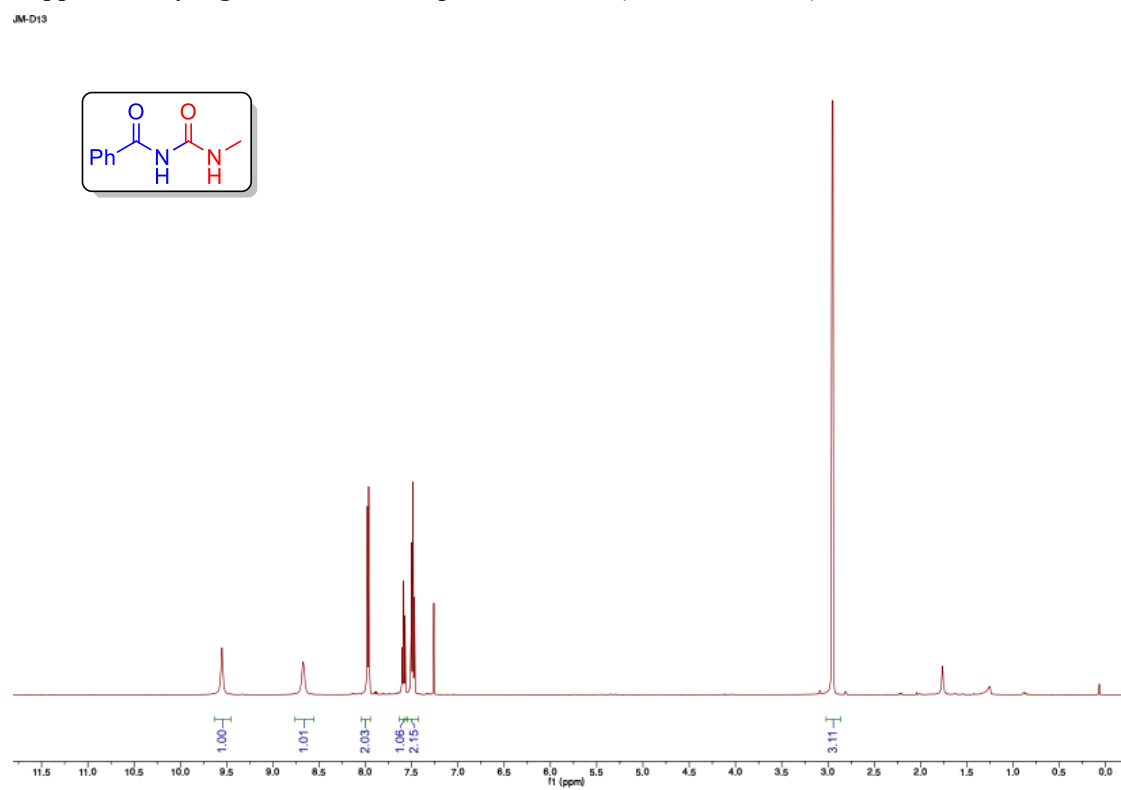

Supplementary Figure 63. <sup>1</sup>H NMR Spectrum of 3ap (500MHz, DMSO-d<sub>6</sub>)

SJ-2208243.1.fid

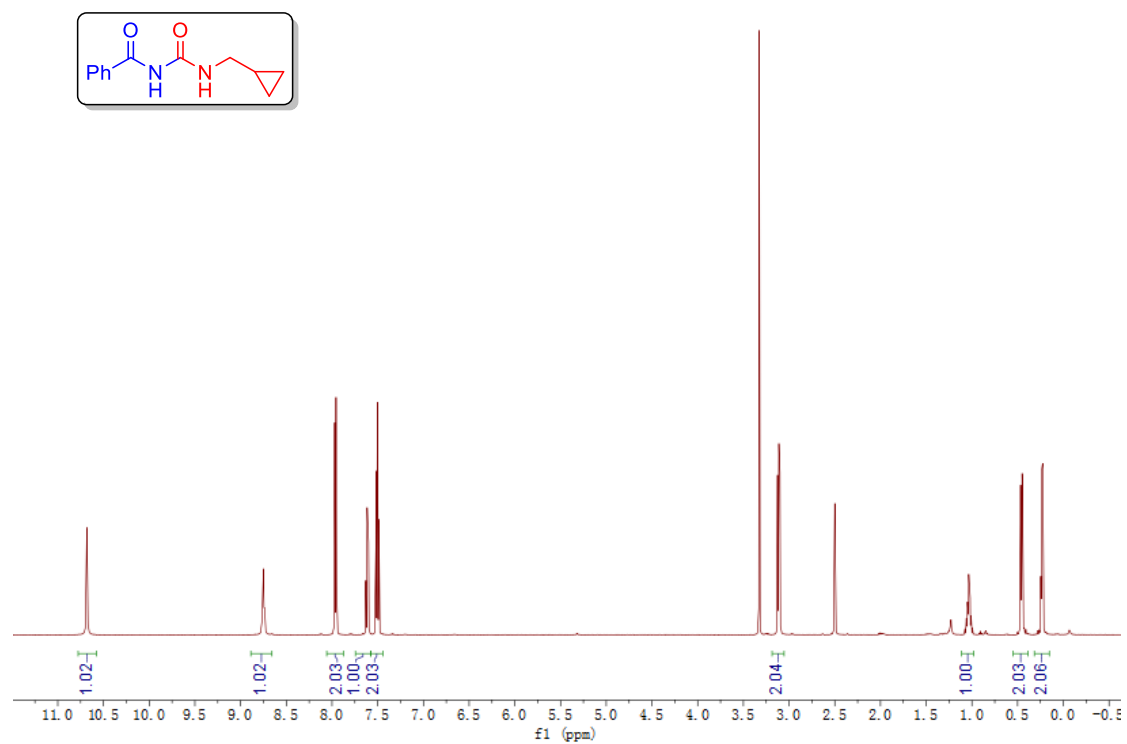

Supplementary Figure 64. <sup>13</sup>C NMR Spectrum of 3ap (125 MHz, DMSO-d<sub>6</sub>)

SJ-2208243.2.fid

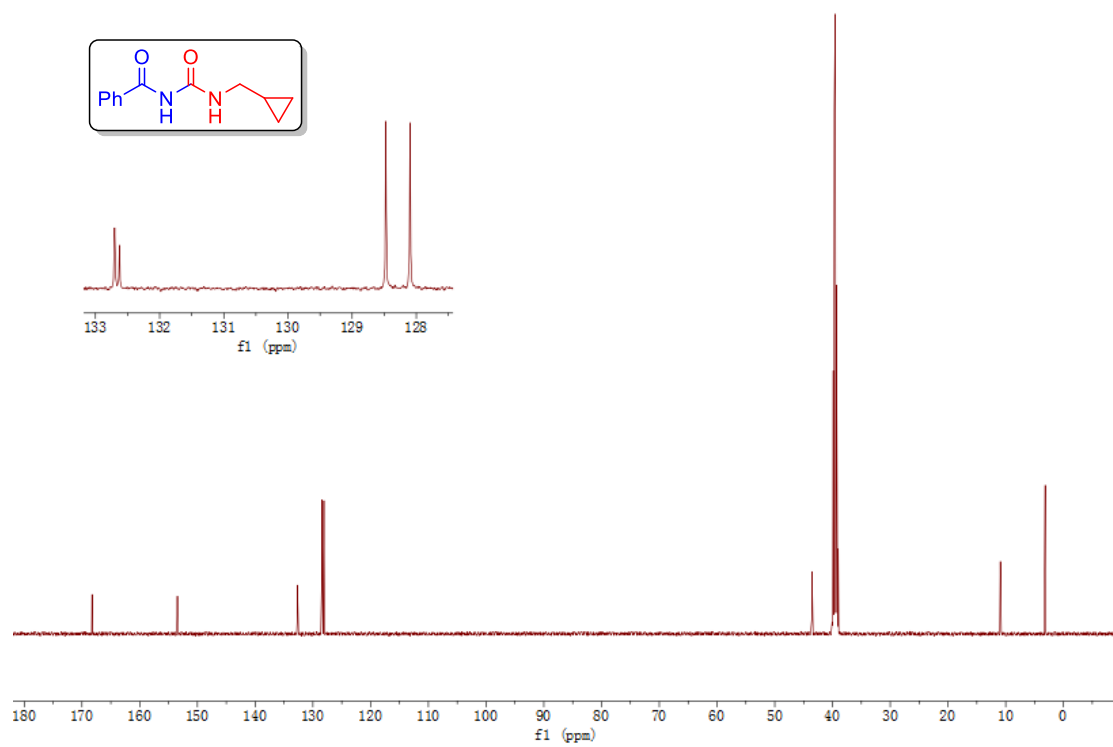

Supplementary Figure 65. <sup>1</sup>H NMR Spectrum of 3bb (500MHz, DMSO-d<sub>6</sub>)

JM-A90

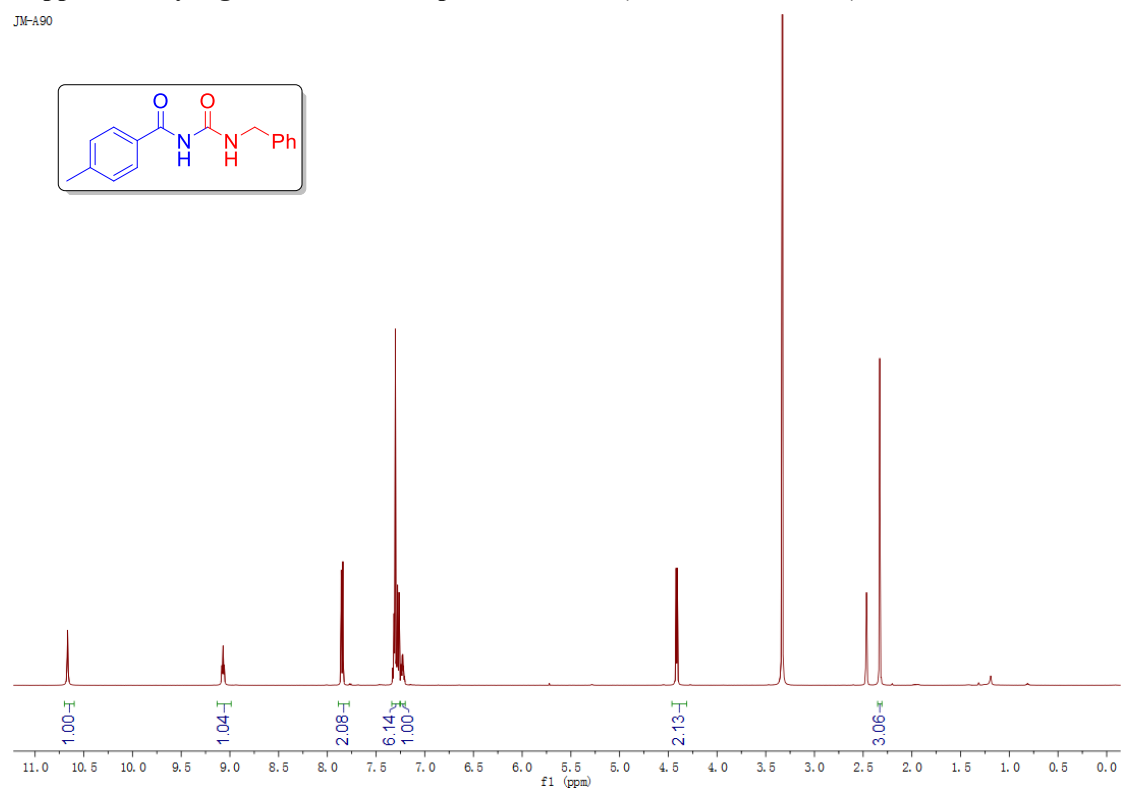

Supplementary Figure 66. <sup>1</sup>H NMR Spectrum of 3cb (500MHz, CDCl<sub>3</sub>)

JM-D4

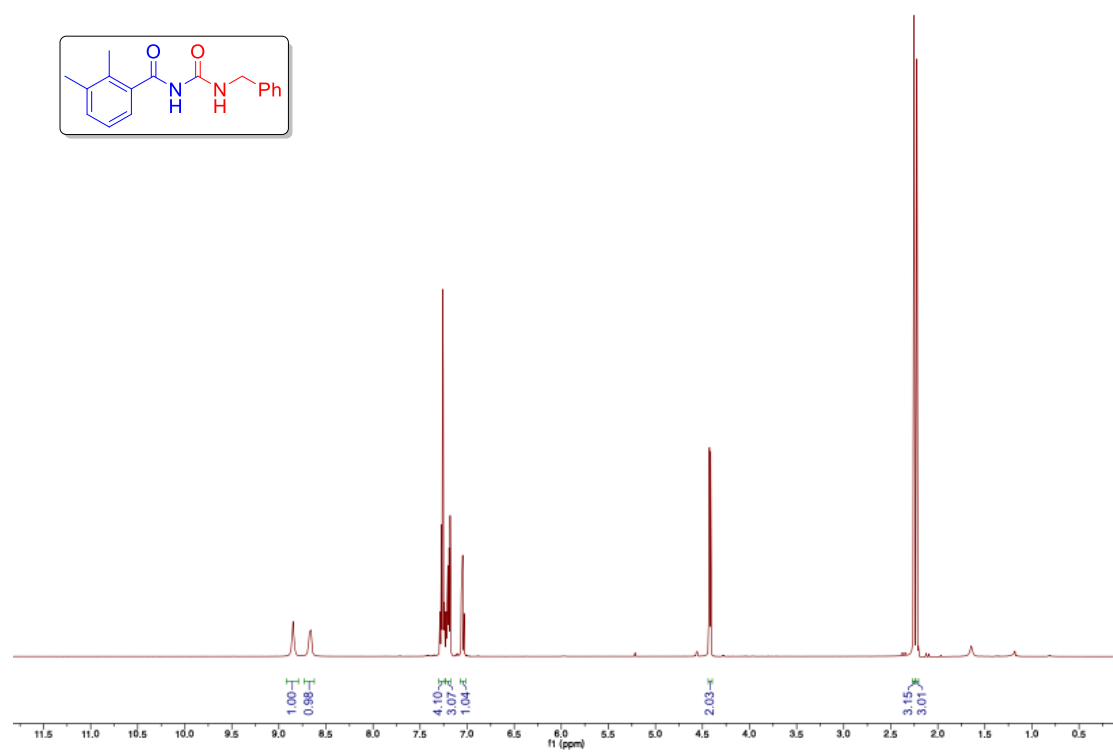

Supplementary Figure 67.  $^{13}\text{C}$  NMR Spectrum of 3b (125 MHz,  $\text{CDCl}_3$ )

JM-D4

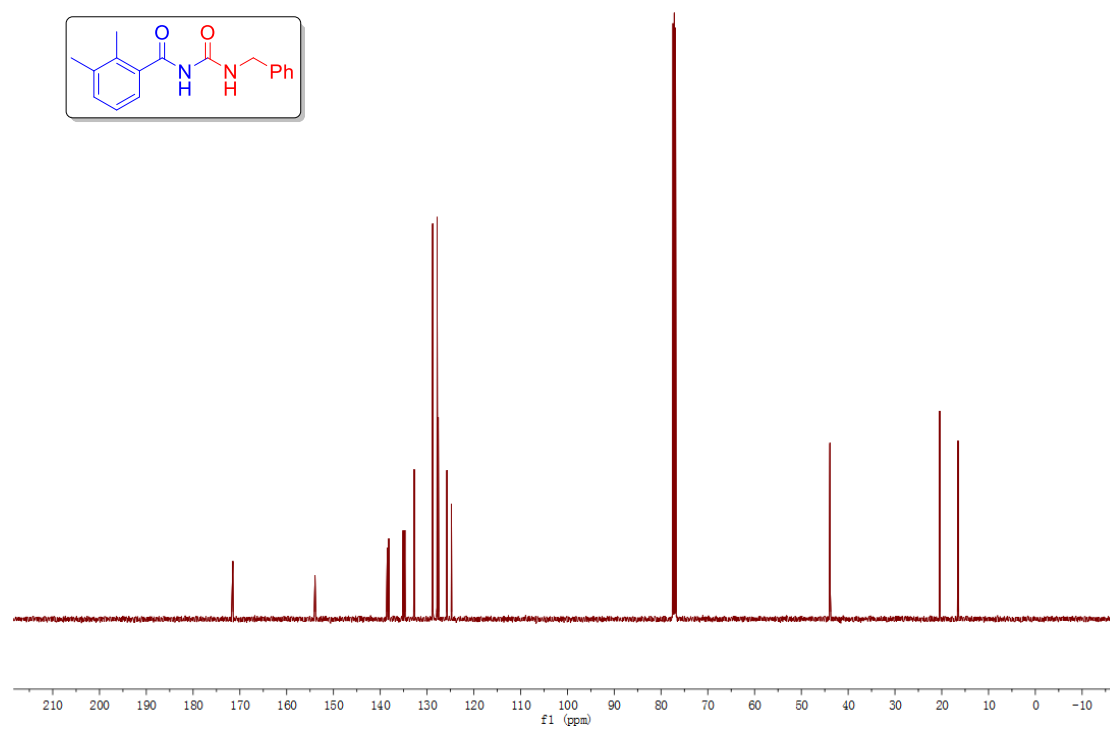

Supplementary Figure 68.  $^1\text{H}$  NMR Spectrum of 3b (500 MHz,  $\text{DMSO}-d_6$ )

JM-A128

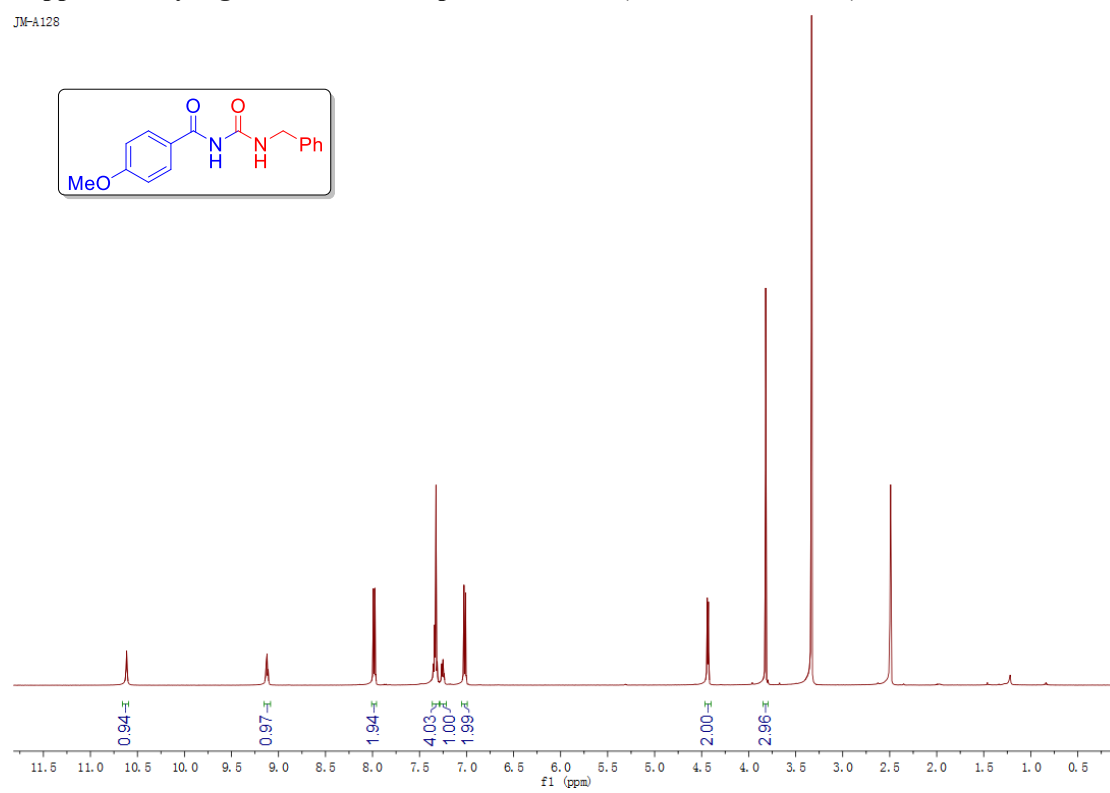

Supplementary Figure 69.  $^{13}\text{C}$  NMR Spectrum of 3db (125 MHz,  $\text{DMSO-}d_6$ )

JM-A128.2.fid

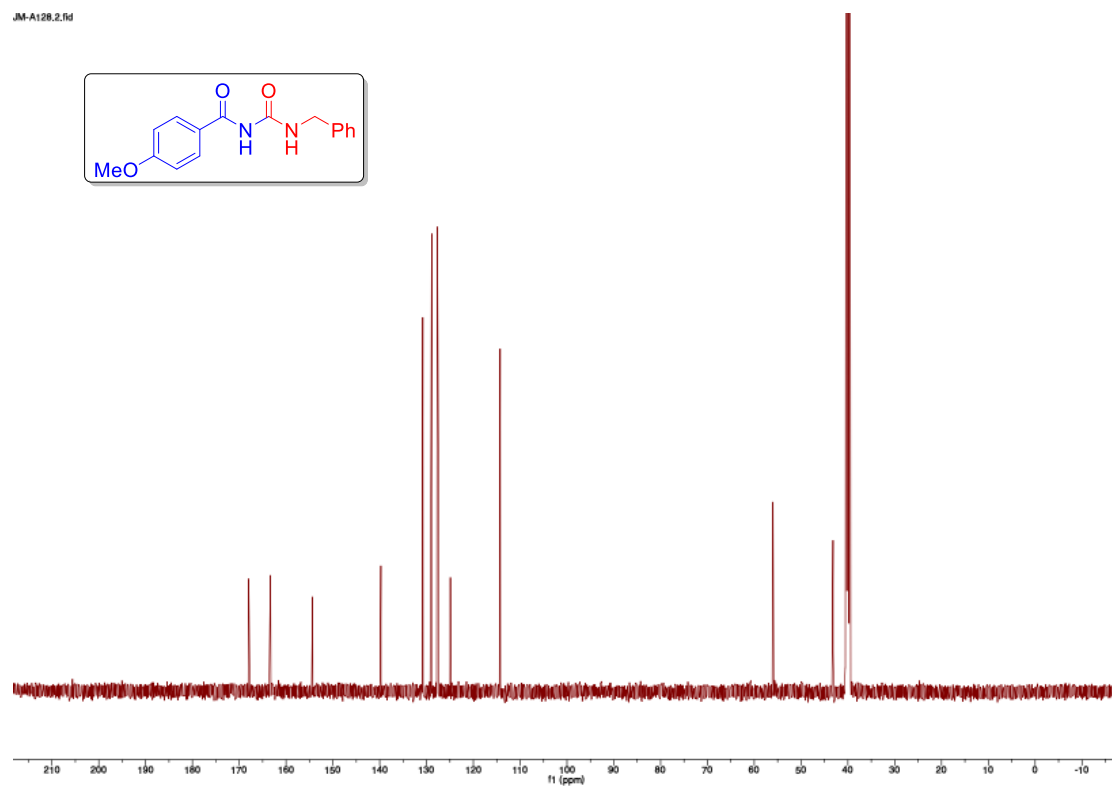

Supplementary Figure 70.  $^1\text{H}$  NMR Spectrum of 3eb (500MHz,  $\text{CDCl}_3$ )

JM-D6

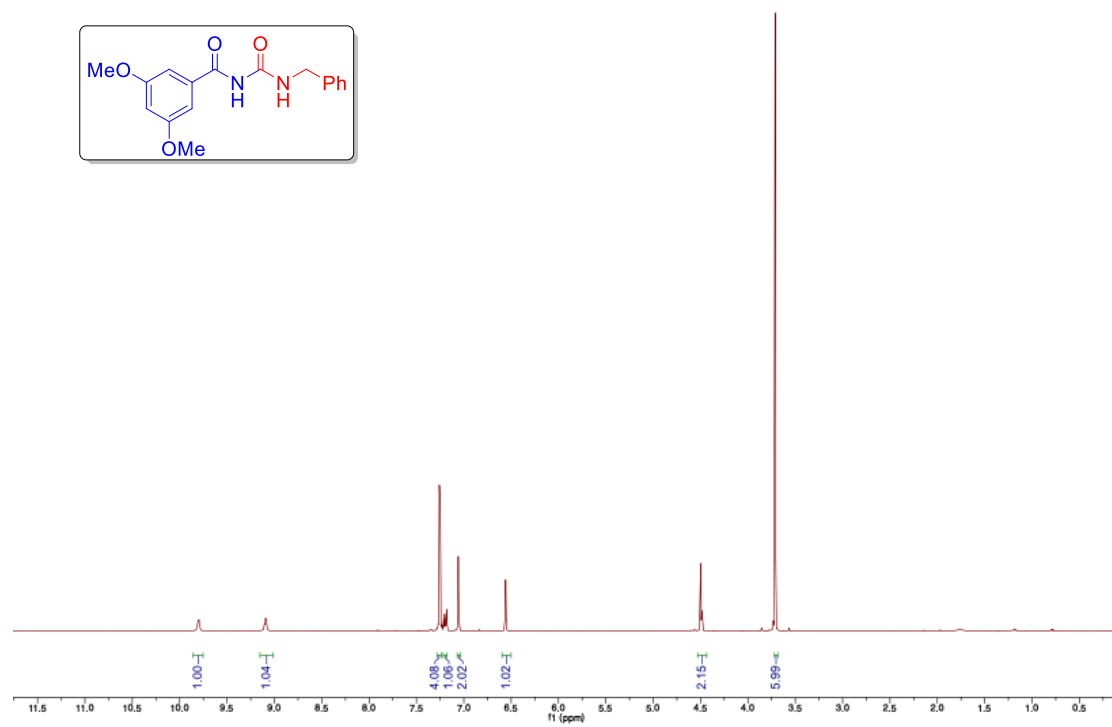

Supplementary Figure 71.  $^{13}\text{C}$  NMR Spectrum of 3eb (125 MHz,  $\text{CDCl}_3$ )

JM-05

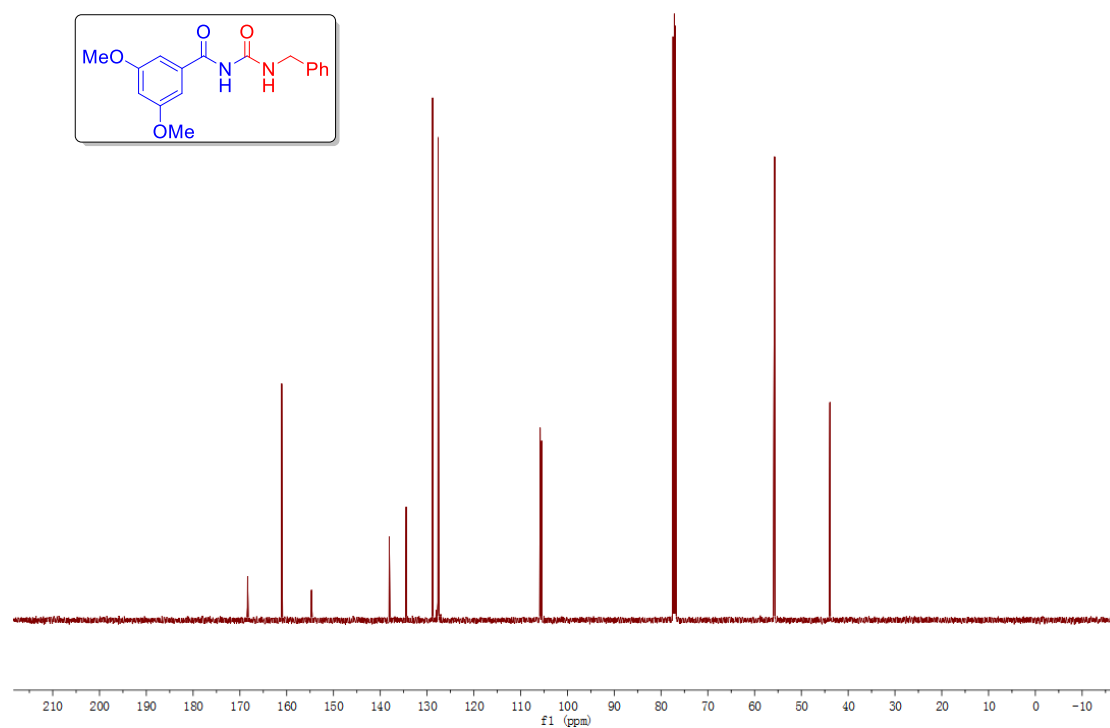

Supplementary Figure 72.  $^1\text{H}$  NMR Spectrum of 3fb (500MHz,  $\text{DMSO}-d_6$ )

JM-A108-1

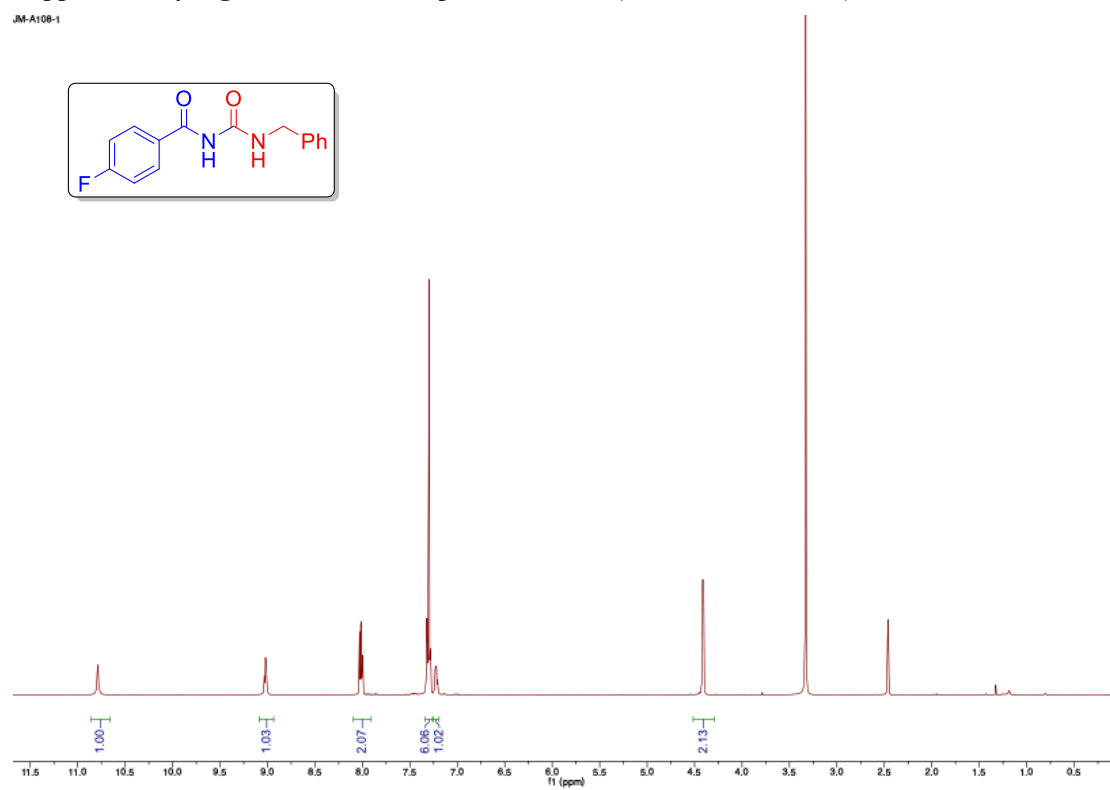



Supplementary Figure 73.  $^{13}\text{C}$  NMR Spectrum of 3fb (125 MHz,  $\text{DMSO-}d_6$ )

JM-A108-1

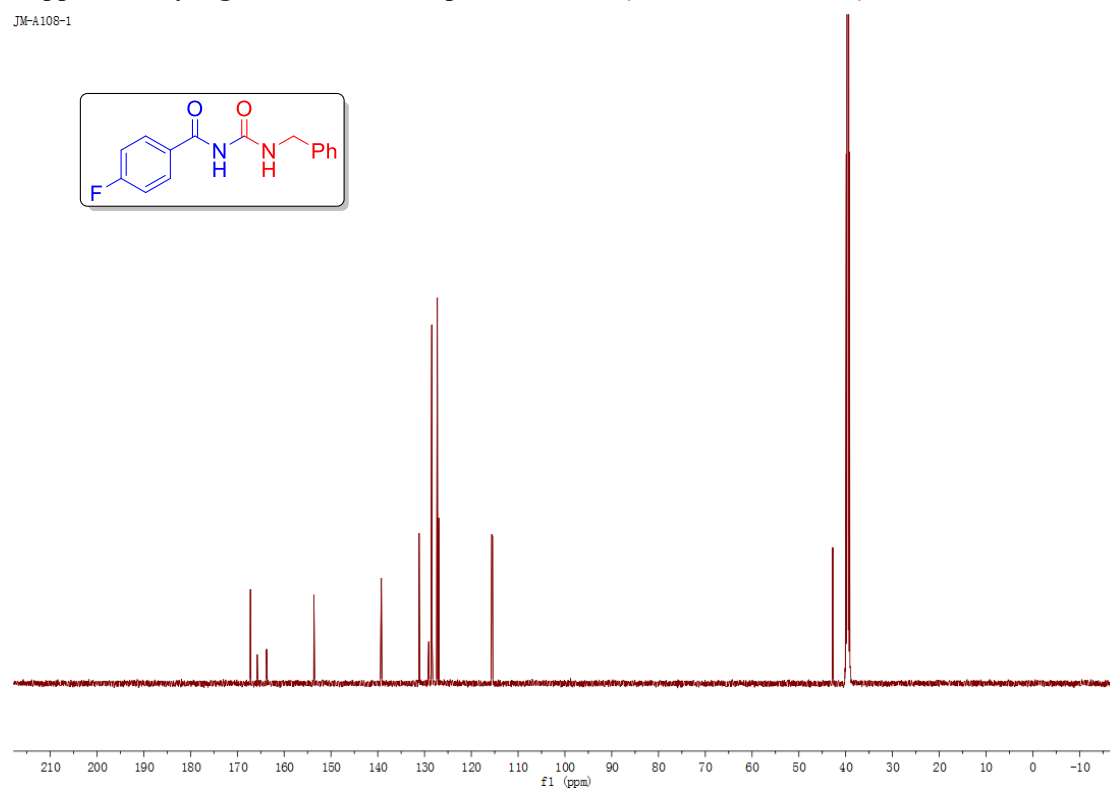

Supplementary Figure 74.  $^1\text{H}$  NMR Spectrum of 3gb (500MHz,  $\text{DMSO-}d_6$ )

JM-A107

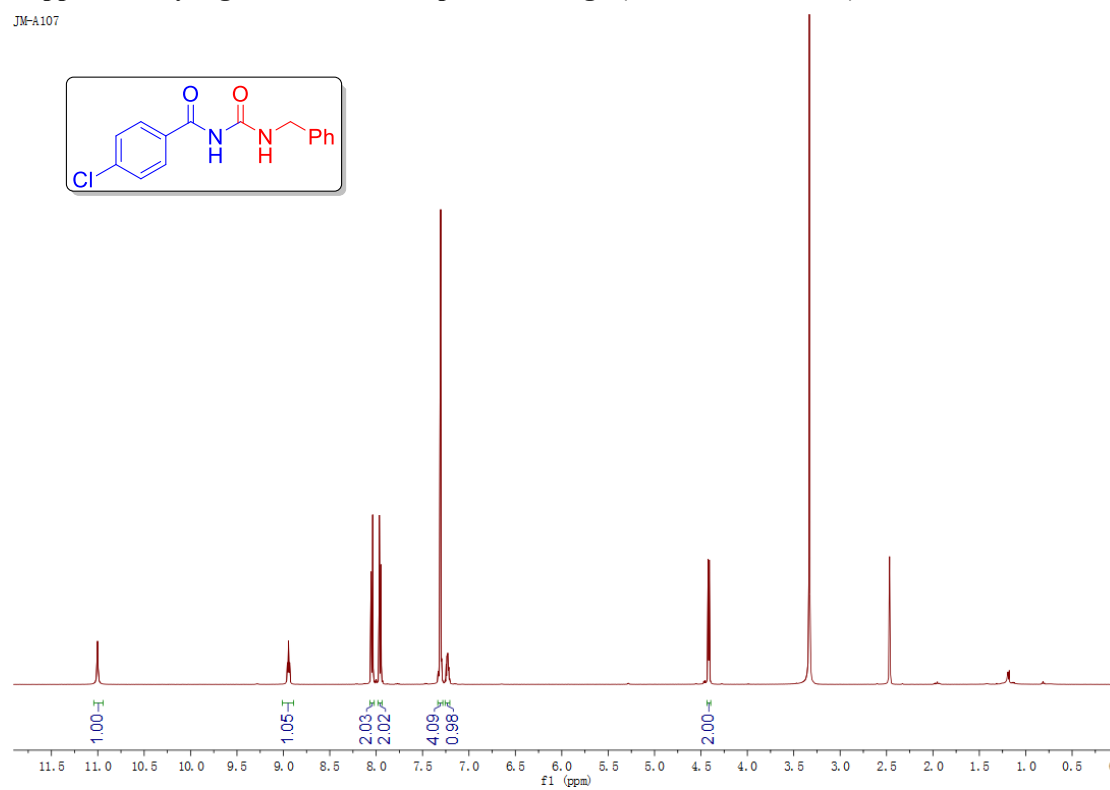

Supplementary Figure 75. <sup>1</sup>H NMR Spectrum of 3hb (500MHz, DMSO-*d*<sub>6</sub>)

JM-A91

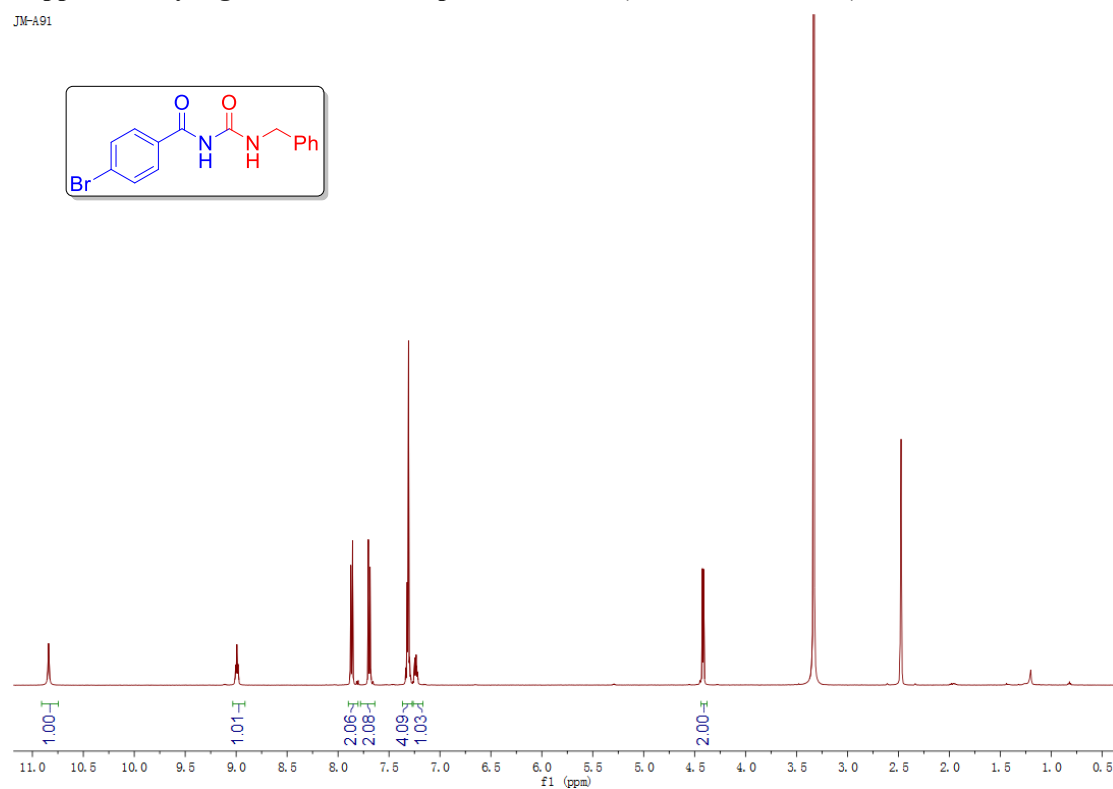

Supplementary Figure 76. <sup>13</sup>C NMR Spectrum of 3hb (125 MHz, DMSO-*d*<sub>6</sub>)

JM-A91-1

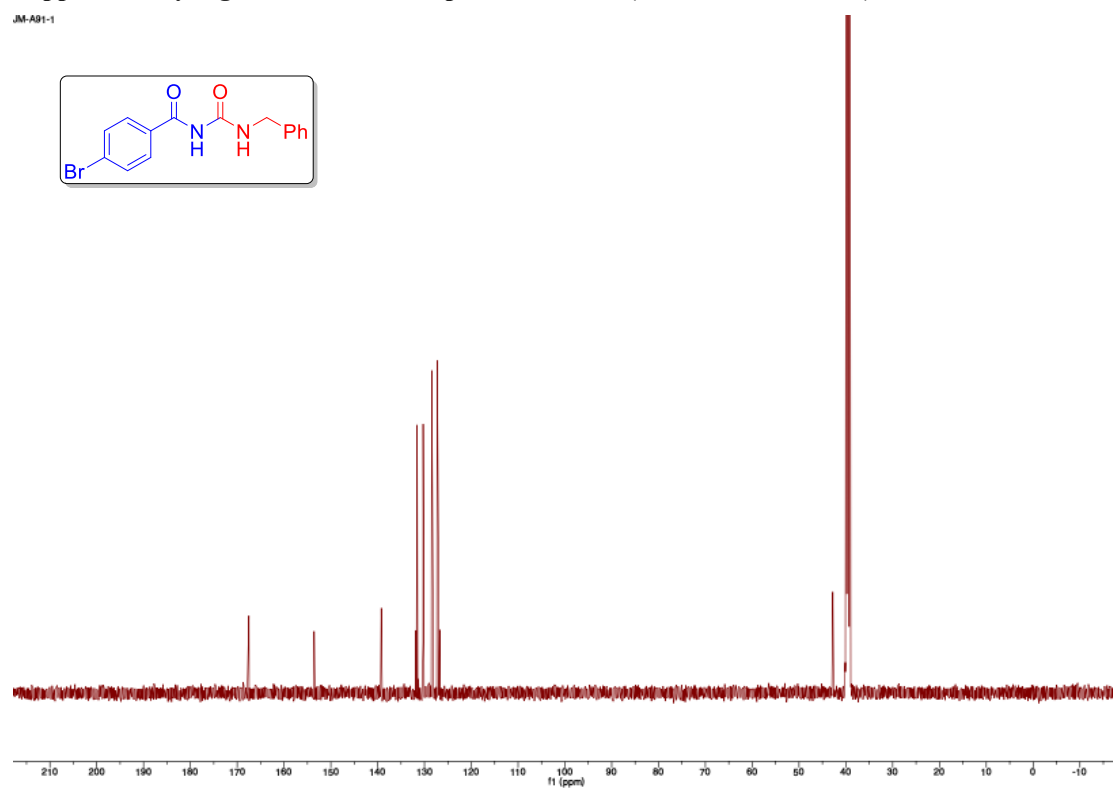

Supplementary Figure 77. <sup>1</sup>H NMR Spectrum of 3ib (500MHz, DMSO-d<sub>6</sub>)

JM-A125

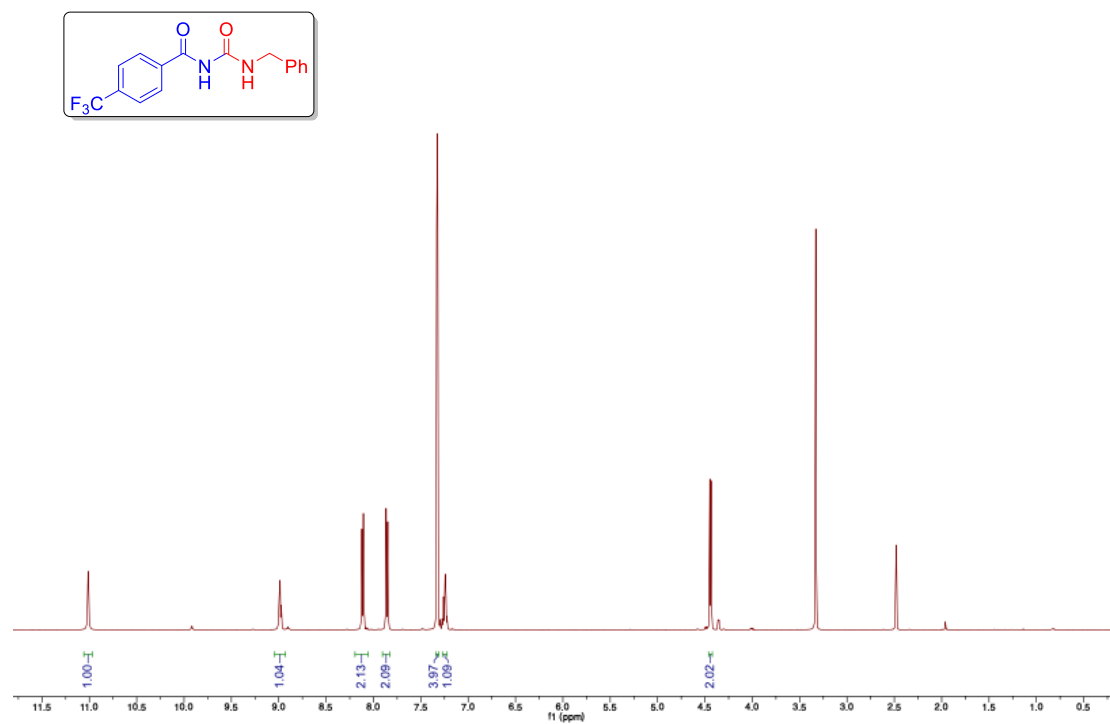

Supplementary Figure 78. <sup>13</sup>C NMR Spectrum of 3ib (125 MHz, DMSO-d<sub>6</sub>)

JM-A125

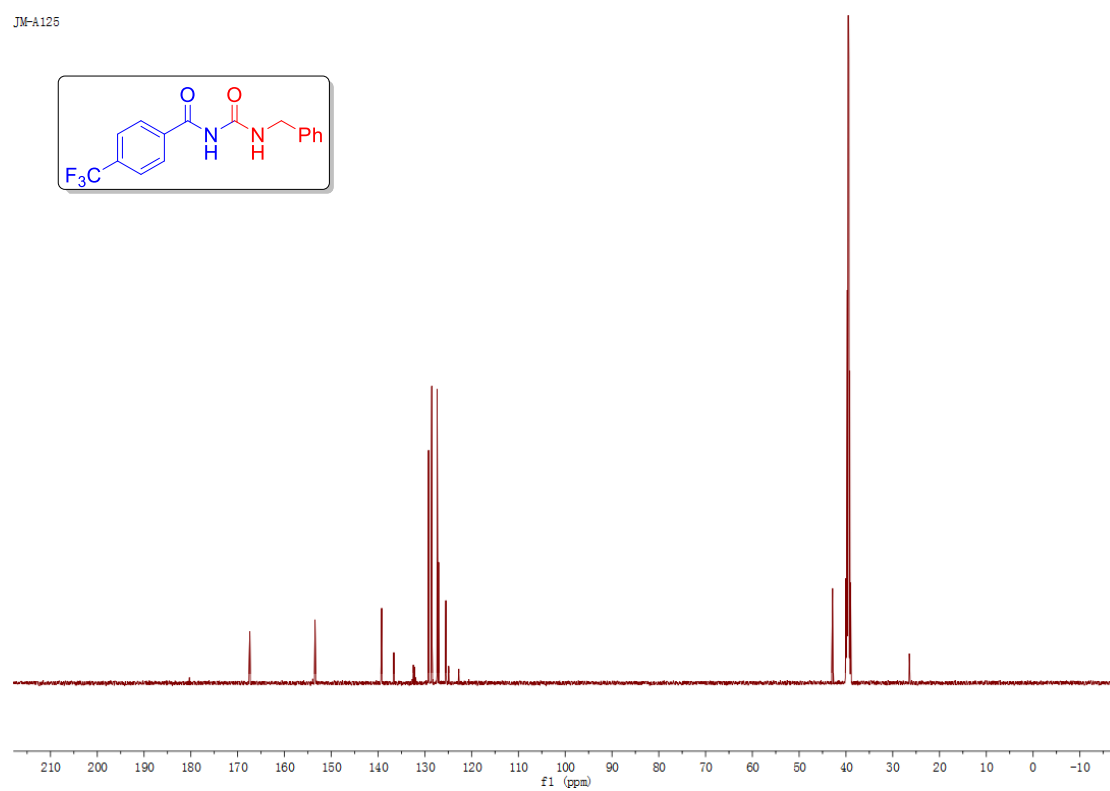

Supplementary Figure 79. <sup>1</sup>H NMR Spectrum of 3jb (500MHz, DMSO-d<sub>6</sub>)

JM-A87

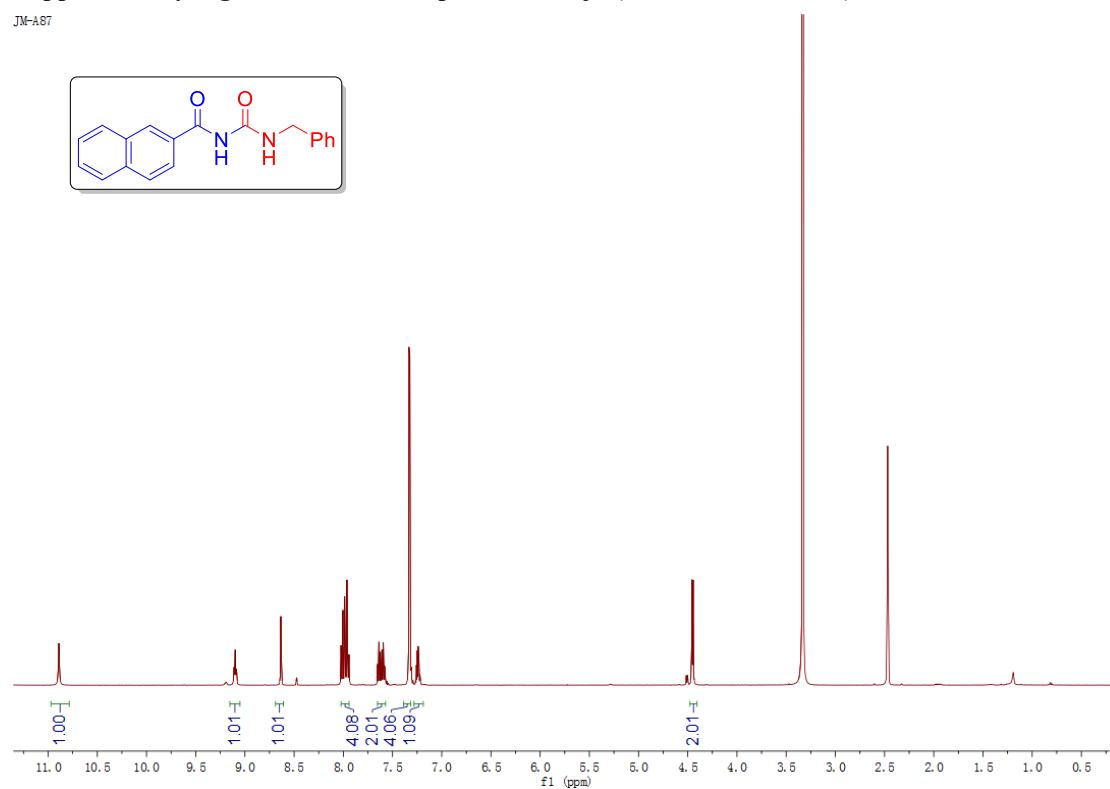

Supplementary Figure 80. <sup>13</sup>C NMR Spectrum of 3jb (125 MHz, DMSO-d<sub>6</sub>)

JM-A87

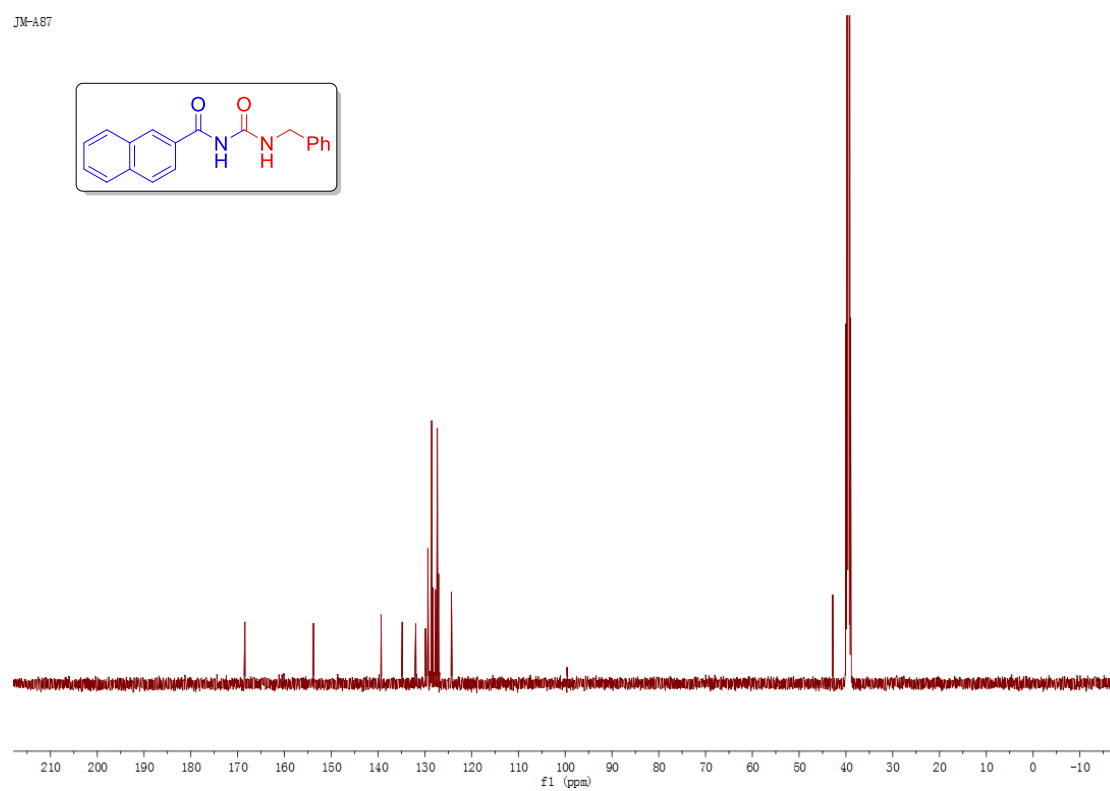

Supplementary Figure 81. <sup>1</sup>H NMR Spectrum of 3kb (500MHz, CDCl<sub>3</sub>)

JM-08

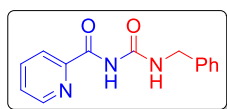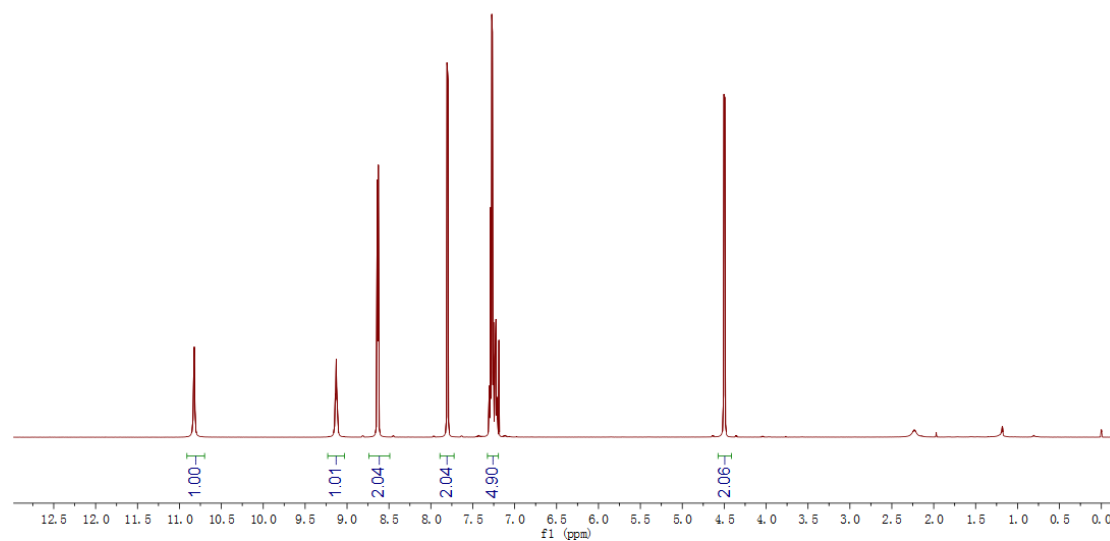

Supplementary Figure 82. <sup>13</sup>C NMR Spectrum of 3kb (125 MHz, CDCl<sub>3</sub>)

JM-08

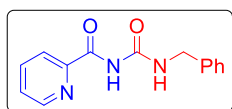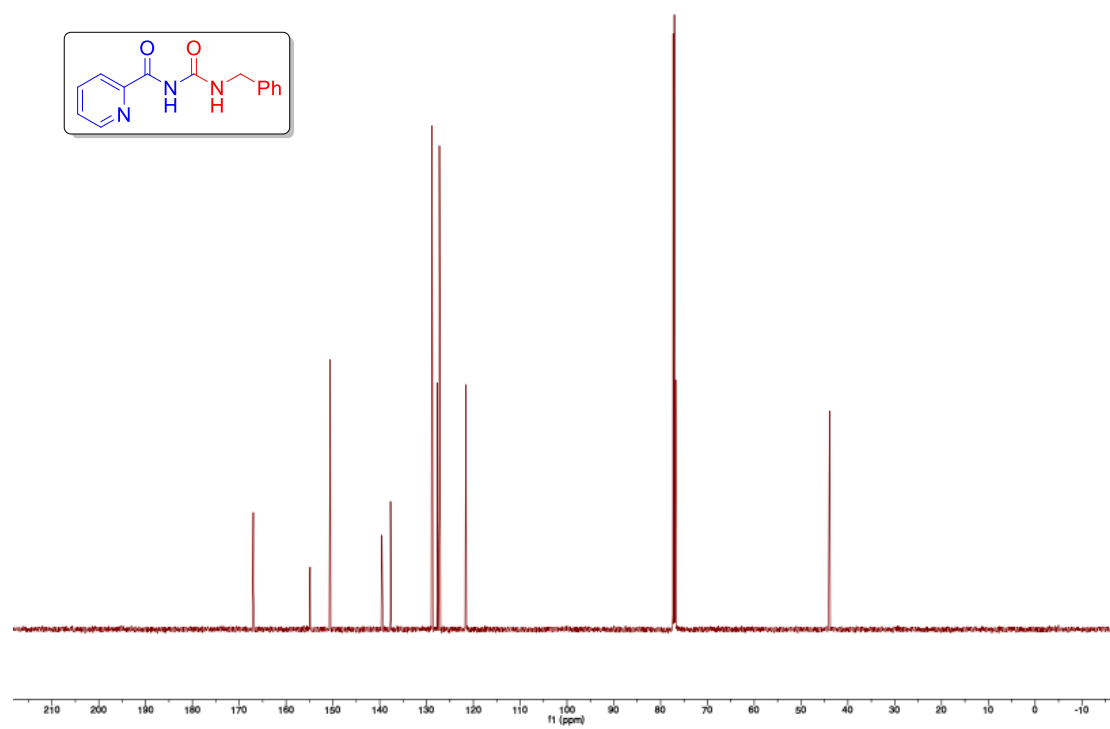

Supplementary Figure 83. <sup>1</sup>H NMR Spectrum of 3lb (500MHz, CDCl<sub>3</sub>)

JM-D7

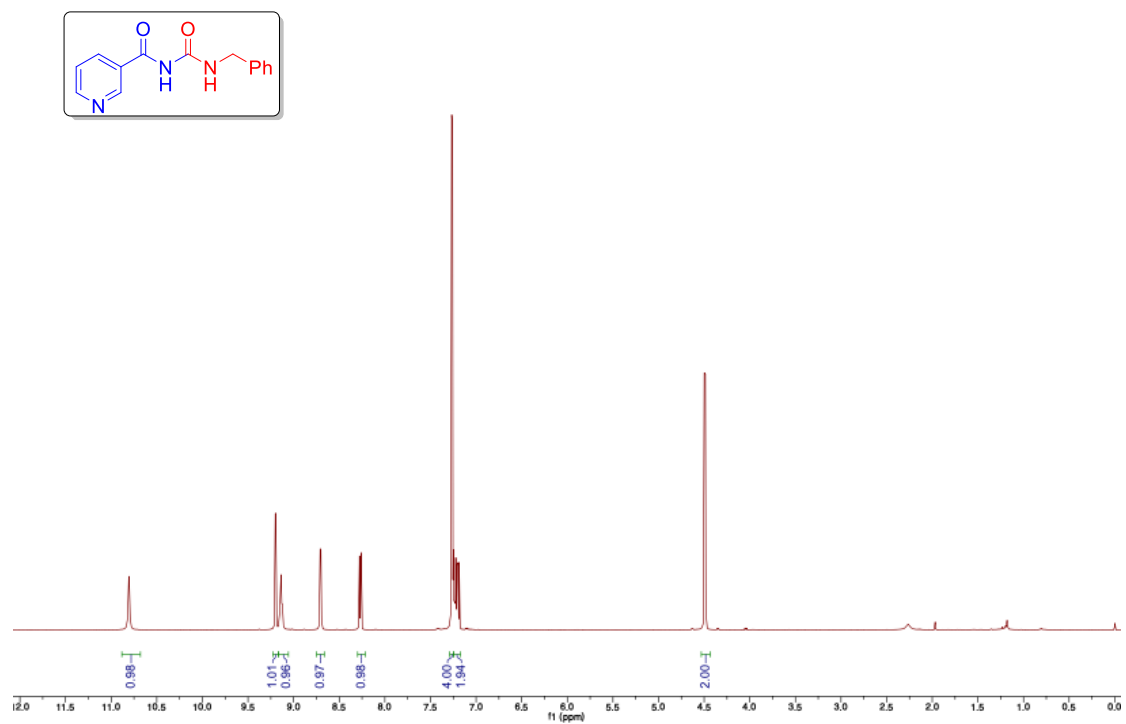

Supplementary Figure 84. <sup>13</sup>C NMR Spectrum of 3lb (125 MHz, CDCl<sub>3</sub>)

JM-D7

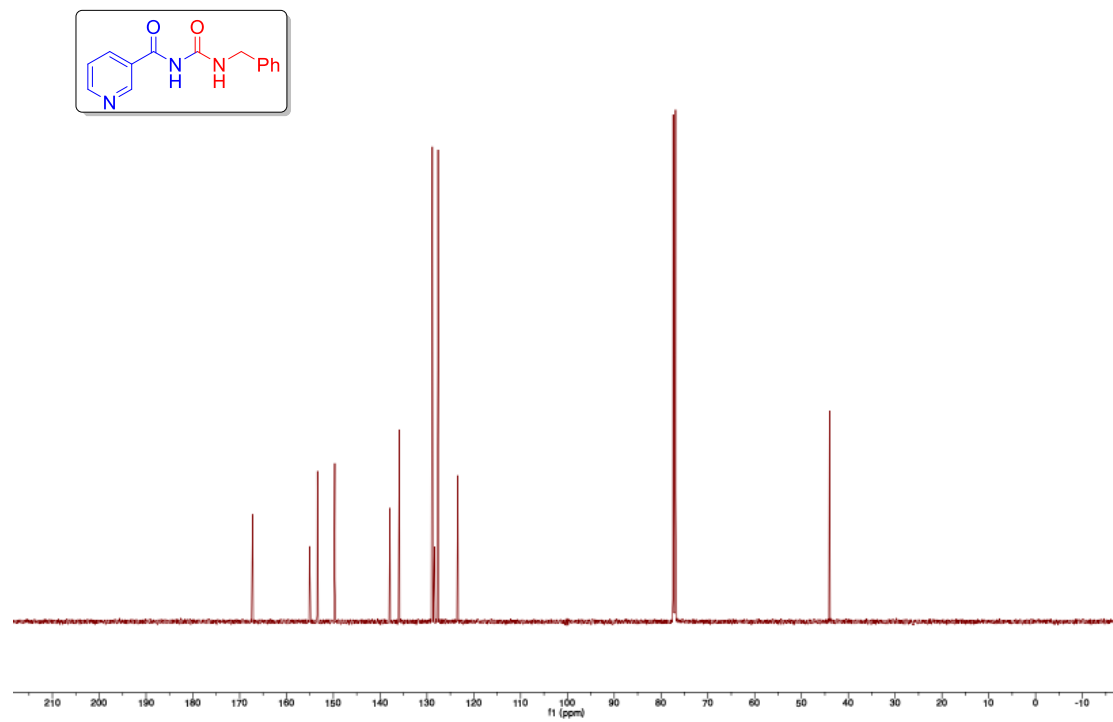

Supplementary Figure 85. <sup>1</sup>H NMR Spectrum of 3mb (500MHz, DMSO-d<sub>6</sub>)

JM-06-1

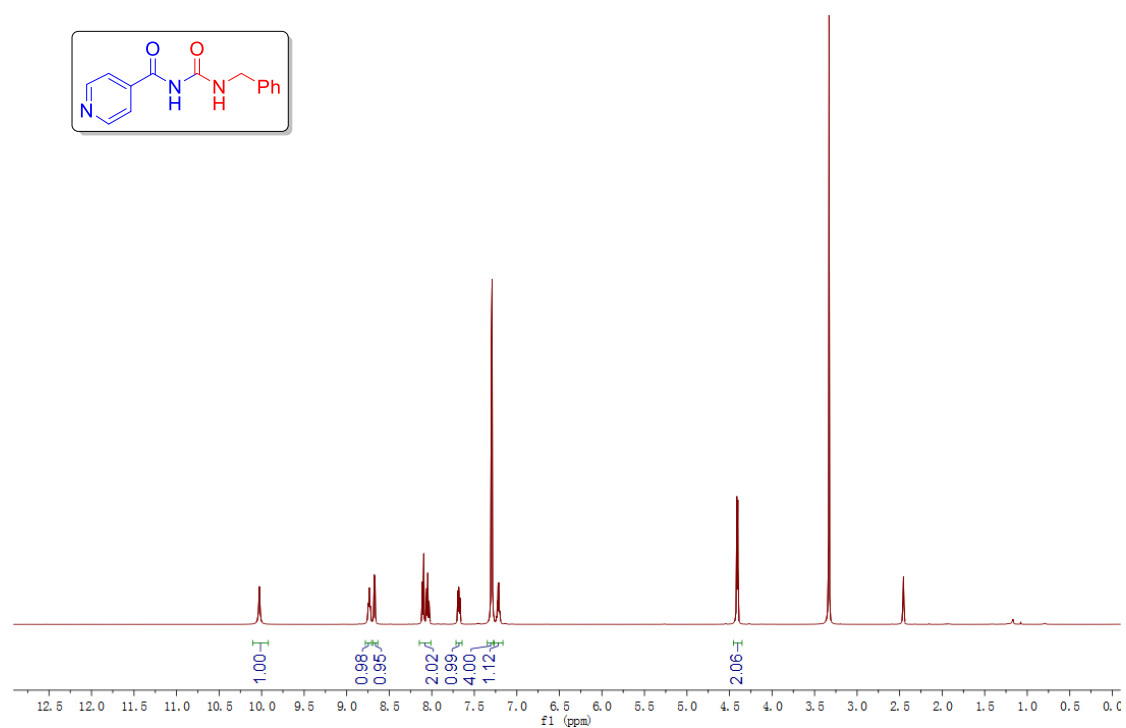

Supplementary Figure 86. <sup>13</sup>C NMR Spectrum of 3mb (125 MHz, CDCl<sub>3</sub>)

JM-06

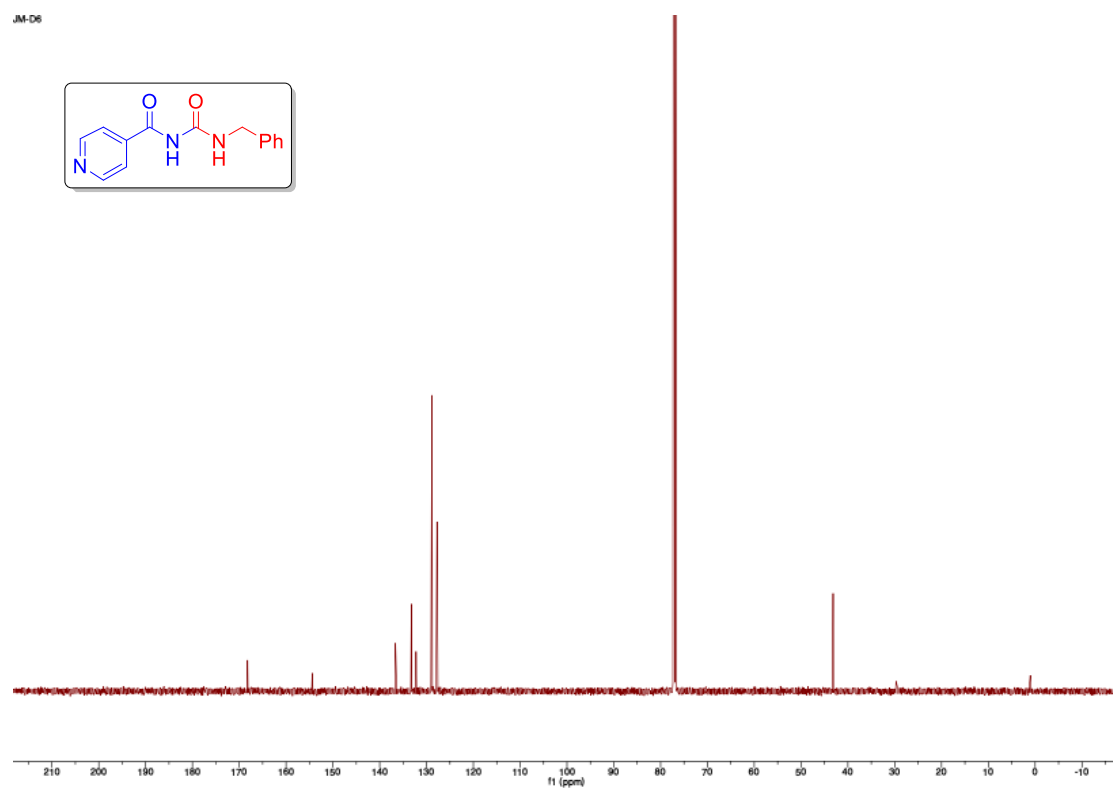

Supplementary Figure 87. <sup>1</sup>H NMR Spectrum of 3nb (500MHz, DMSO-d<sub>6</sub>)

JM-A109

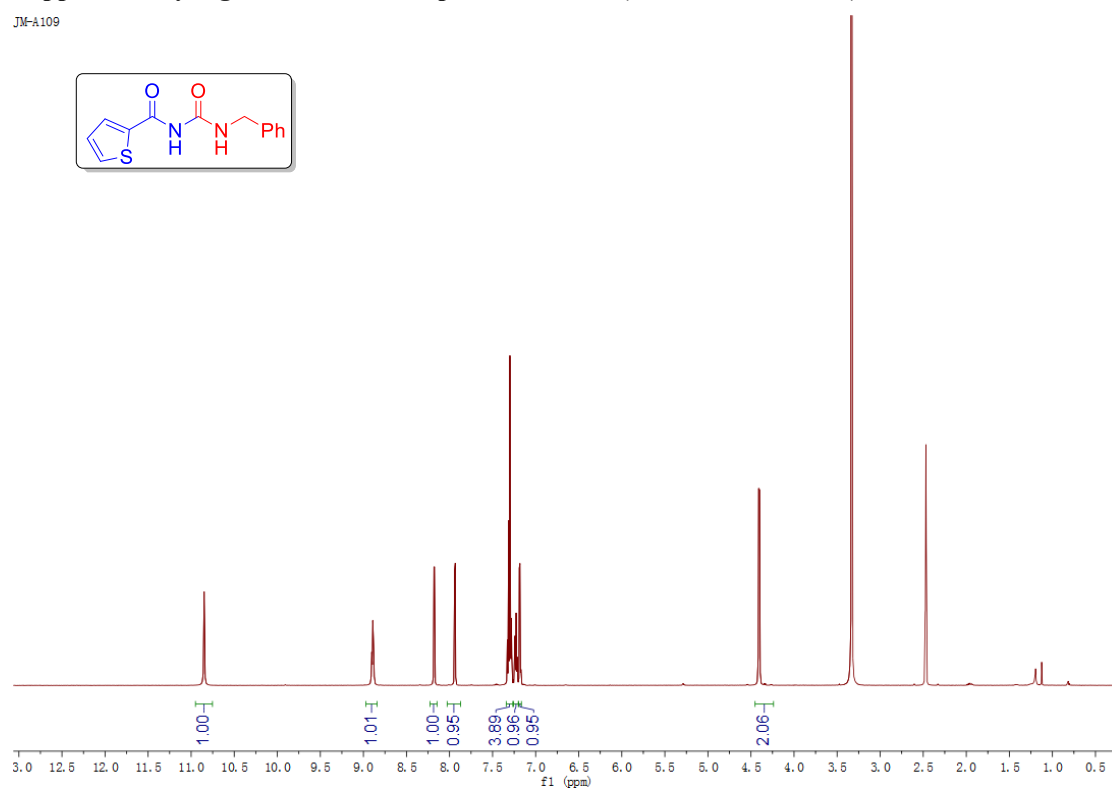

Supplementary Figure 88. <sup>1</sup>H NMR Spectrum of 4ab (500MHz, DMSO-d<sub>6</sub>)

JM-B1

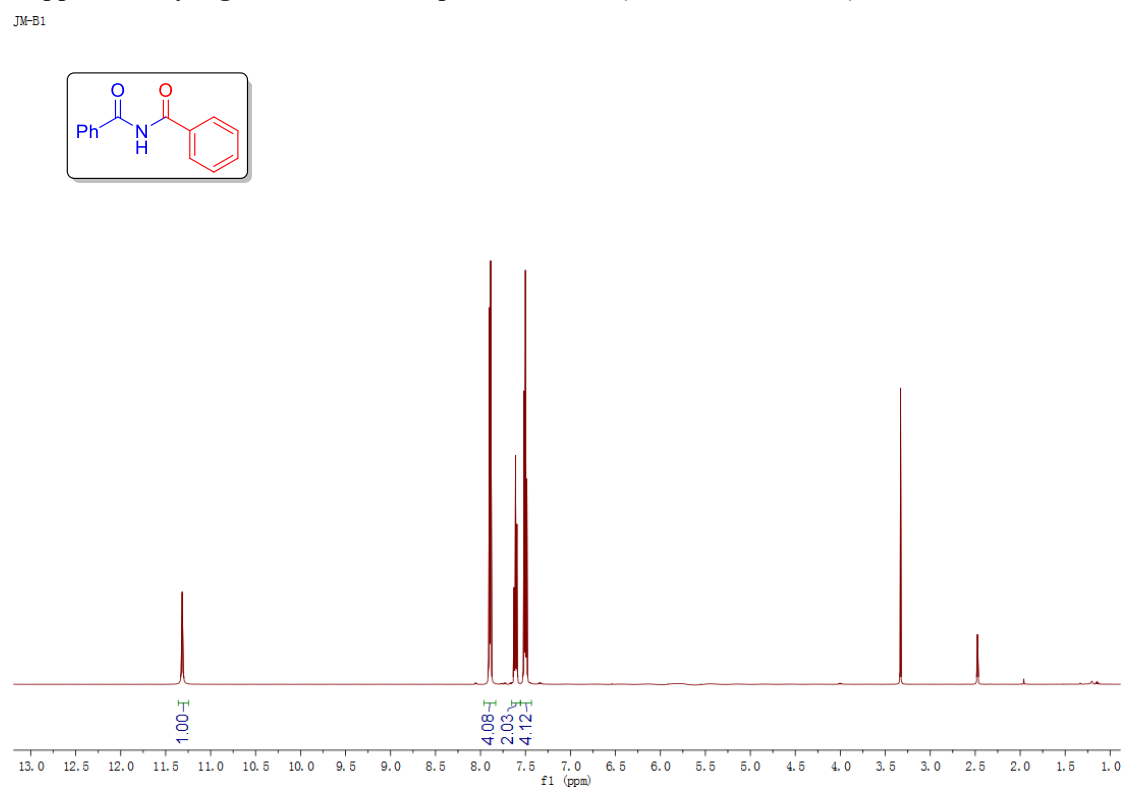



Supplementary Figure 89. <sup>1</sup>H NMR Spectrum of 4ab' (500MHz, DMSO-d<sub>6</sub>)

JM-B43.1.fid

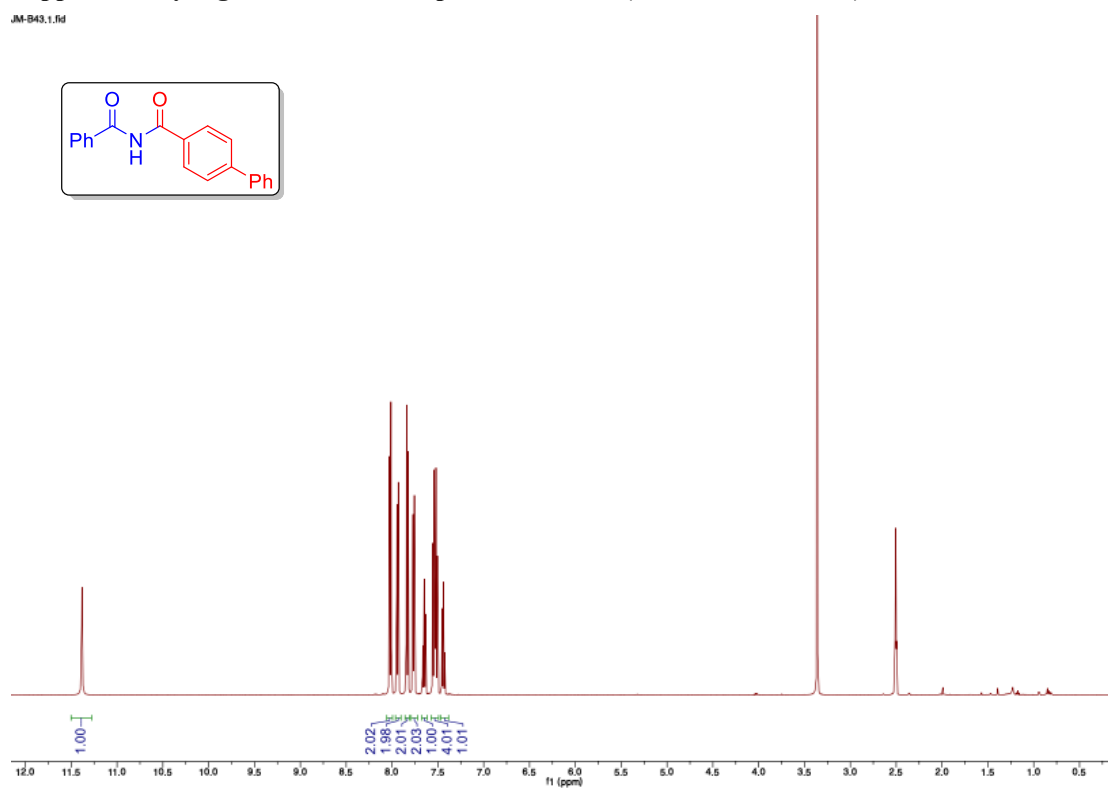

Supplementary Figure 90. <sup>1</sup>H NMR Spectrum of 4ac' (500MHz, DMSO-d<sub>6</sub>)

JM-B36

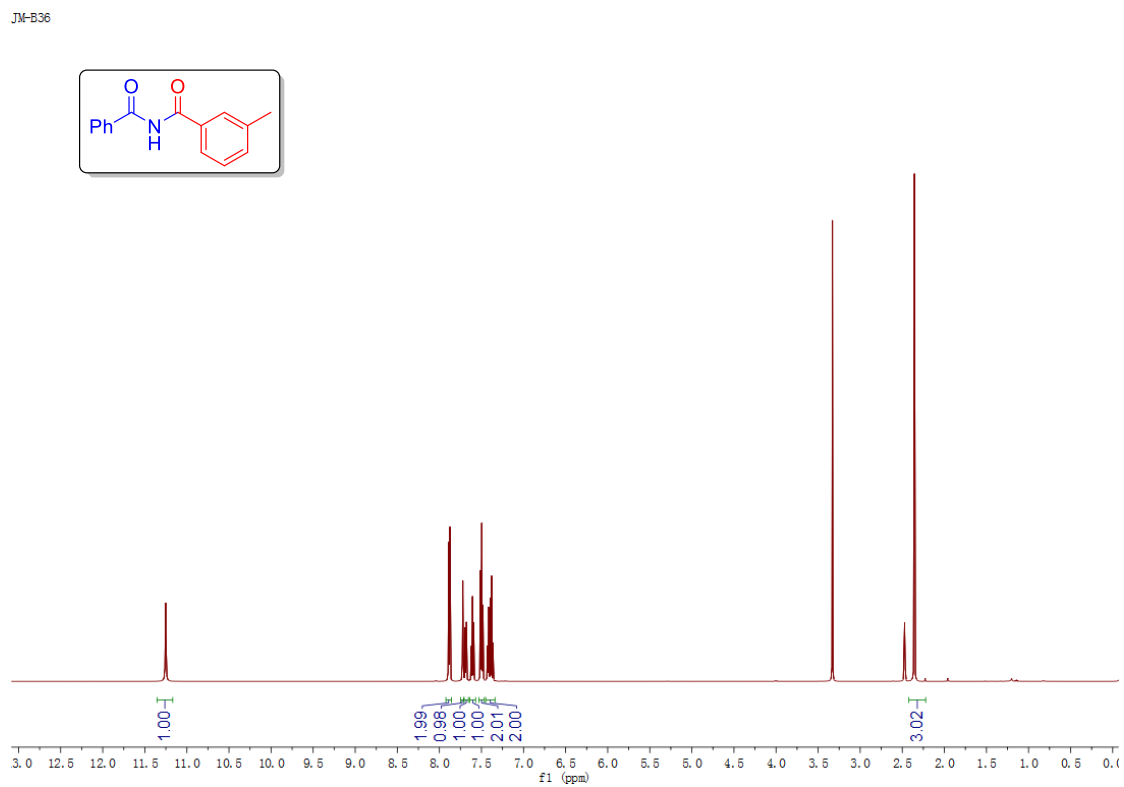

Supplementary Figure 91. <sup>1</sup>H NMR Spectrum of 4ad' (500MHz, DMSO-d<sub>6</sub>)

JM-B46.1.fid

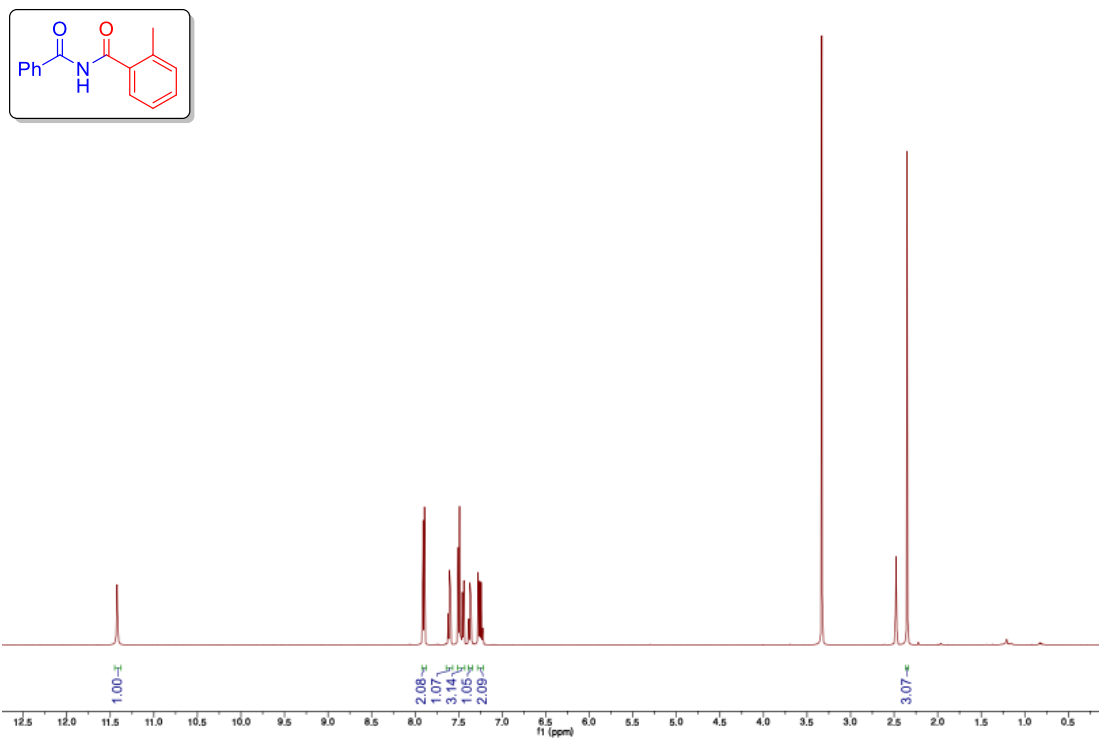

Supplementary Figure 92. <sup>1</sup>H NMR Spectrum of 4ae' (500MHz, DMSO-d<sub>6</sub>)

JM-E30.1.fid

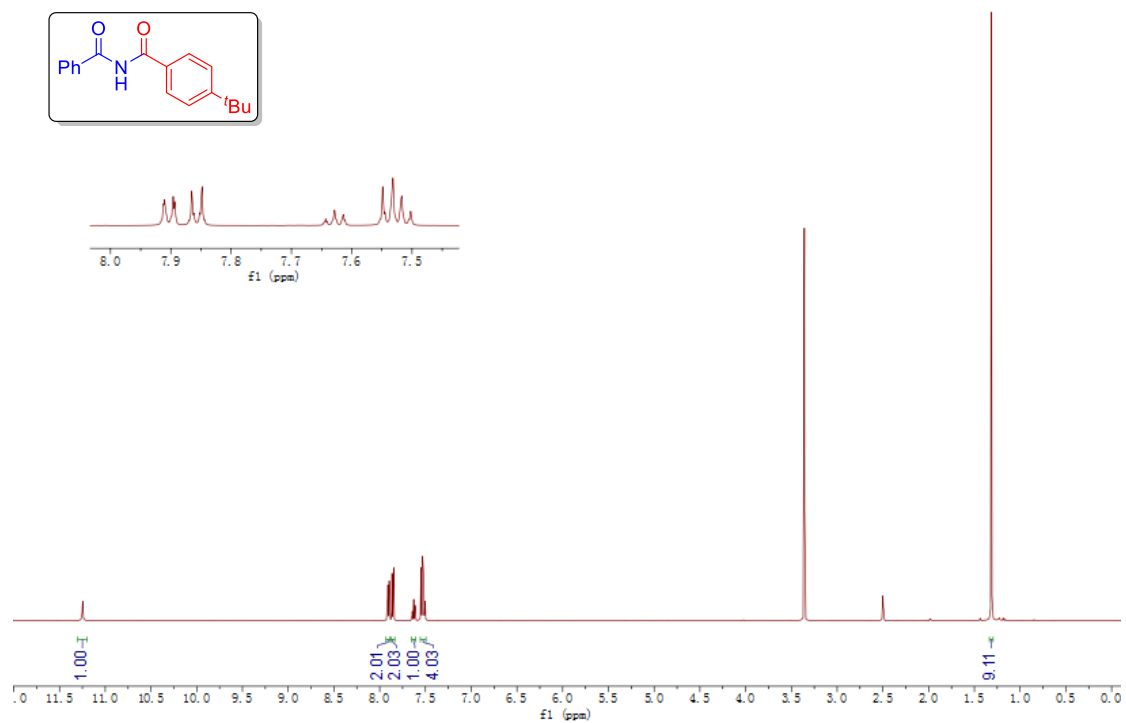

Supplementary Figure 93. <sup>1</sup>H NMR Spectrum of 4af' (500MHz, DMSO-d<sub>6</sub>)

JM-B31

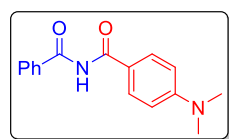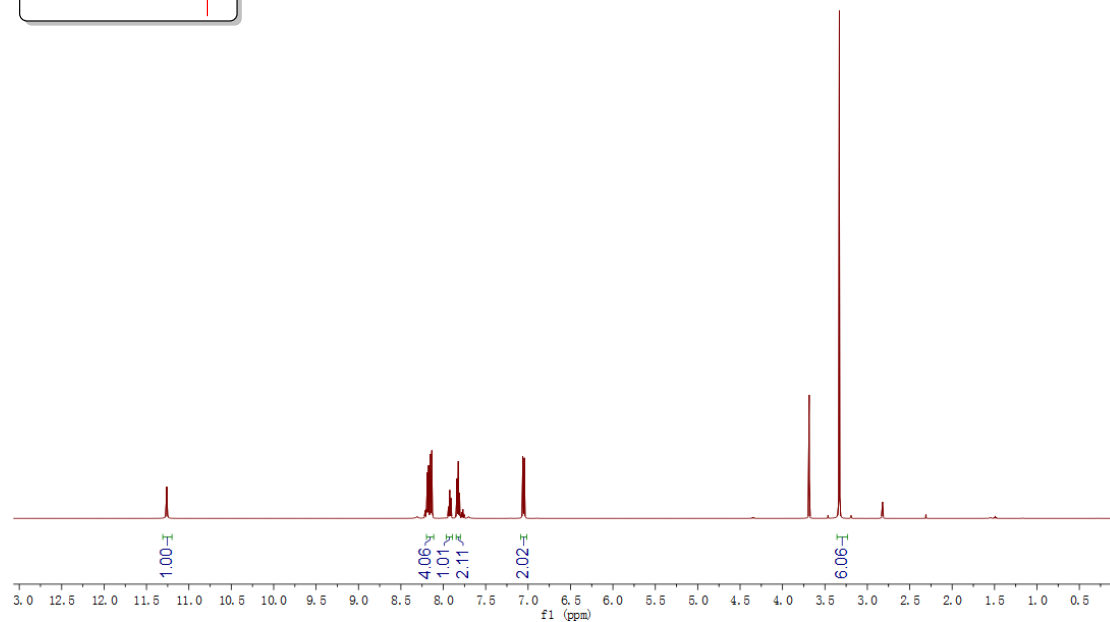

Supplementary Figure 94. <sup>1</sup>H NMR Spectrum of 4ag' (500MHz, DMSO-d<sub>6</sub>)

JM-B13

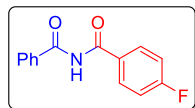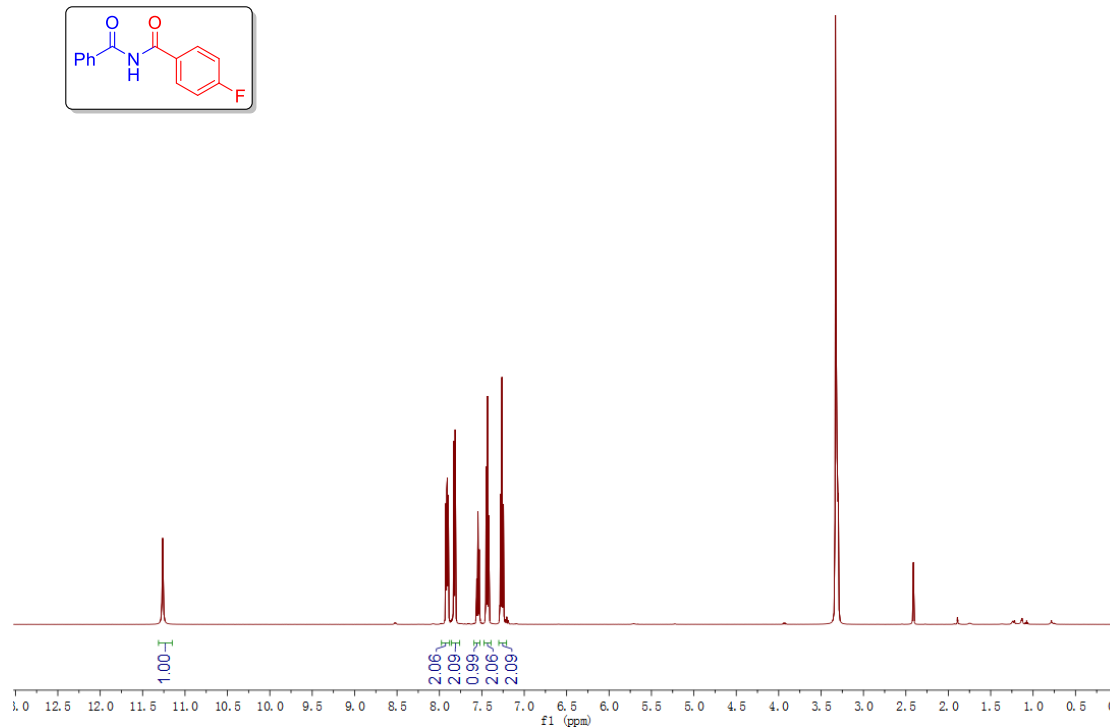

Supplementary Figure 95. <sup>1</sup>H NMR Spectrum of 4ah' (500MHz, CDCl<sub>3</sub>)

JM-C28

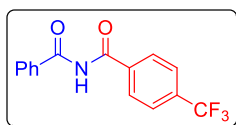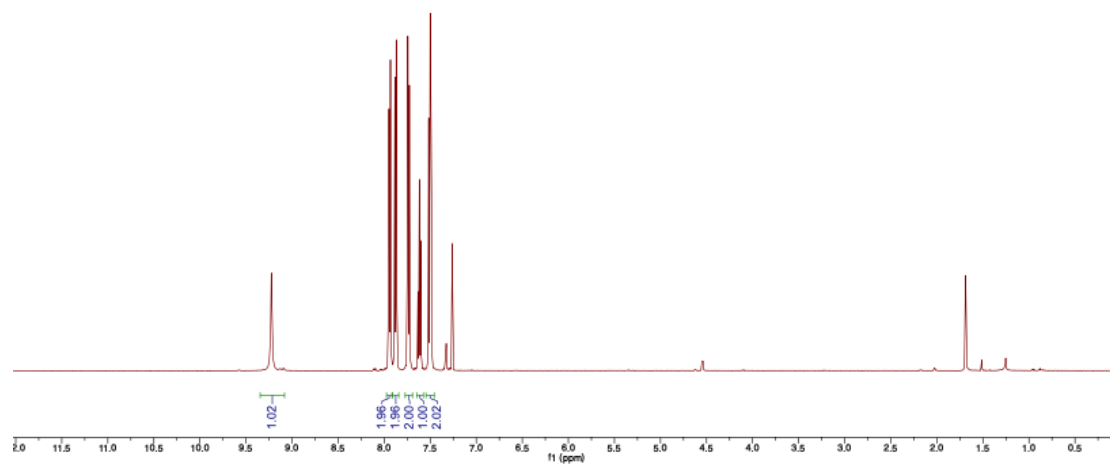

Supplementary Figure 96. <sup>1</sup>H NMR Spectrum of 4ai' (500MHz, DMSO-*d*<sub>6</sub>)

JM-B44\_1.fid

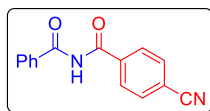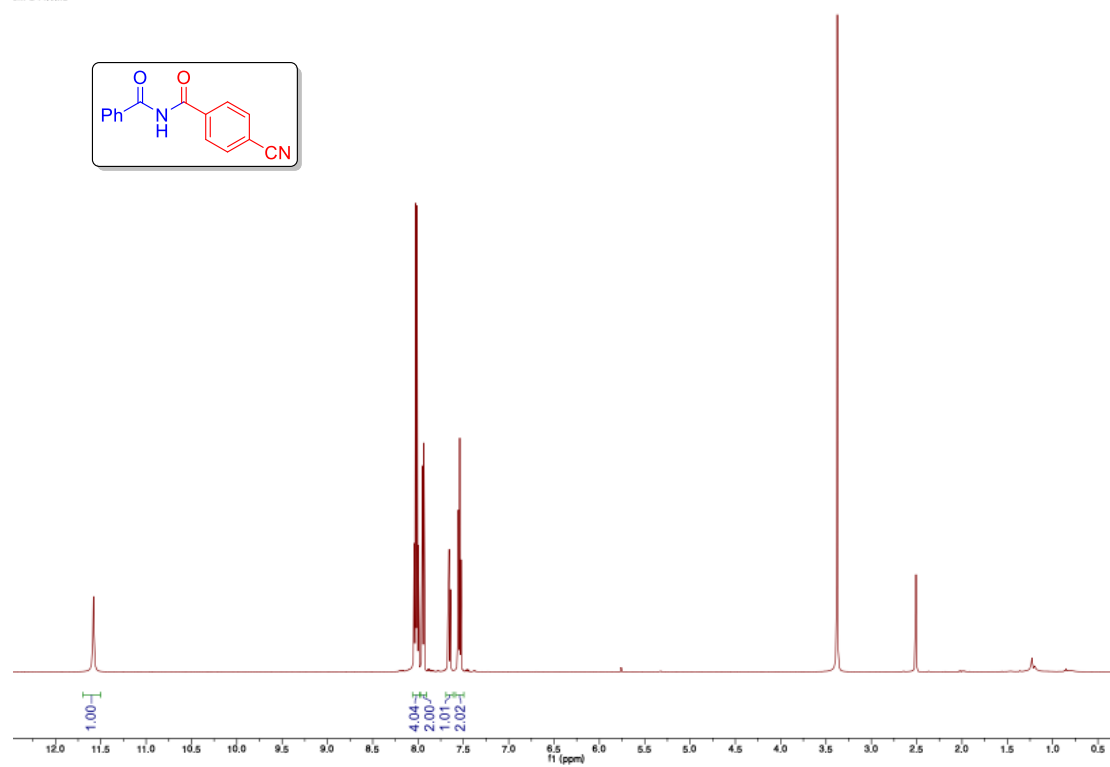

Supplementary Figure 97. <sup>1</sup>H NMR Spectrum of 4aj' (500MHz, DMSO-d<sub>6</sub>)

JM-B34

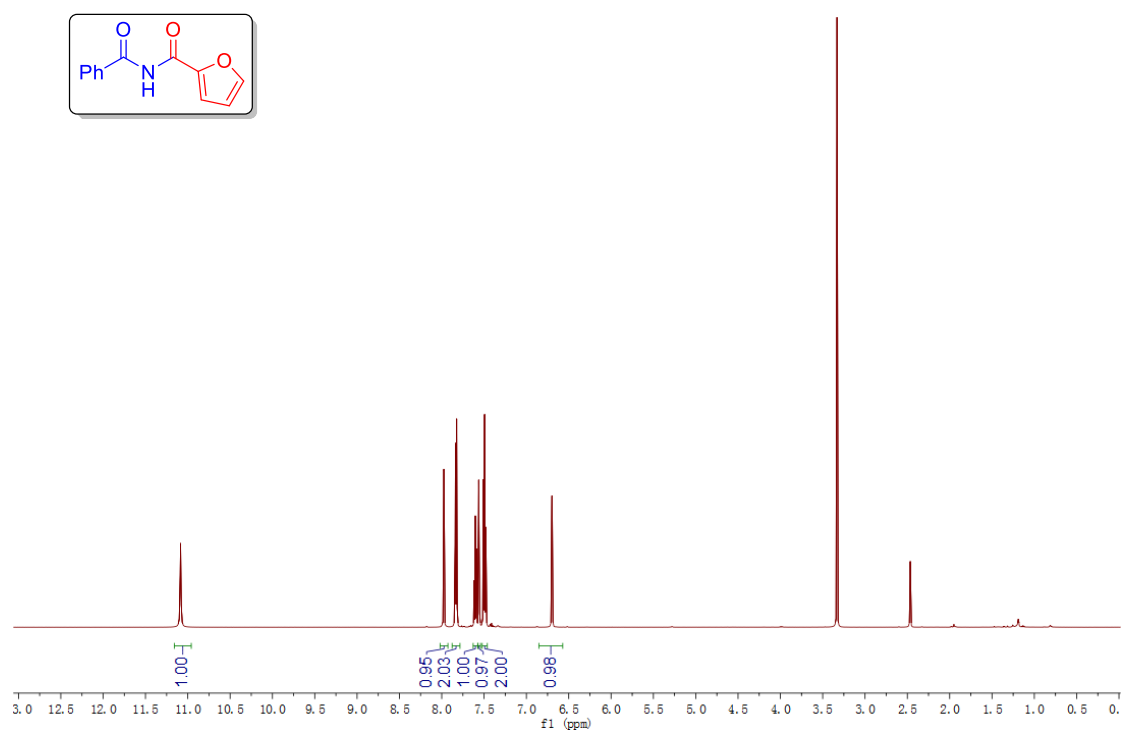

Supplementary Figure 98. <sup>1</sup>H NMR Spectrum of 4ak' (500MHz, CDCl<sub>3</sub>)

JM-C24

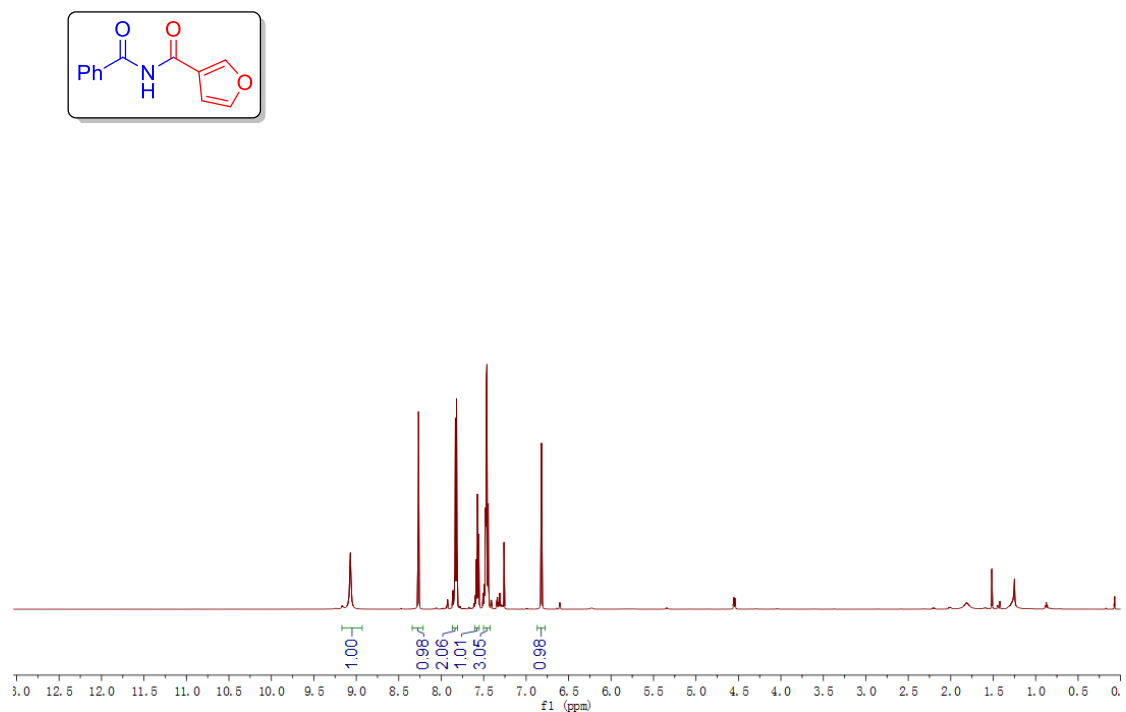

Supplementary Figure 99.  $^{13}\text{C}$  NMR Spectrum of 4ak' (125MHz,  $\text{CDCl}_3$ )

JM-C24

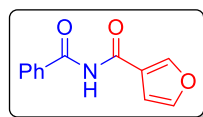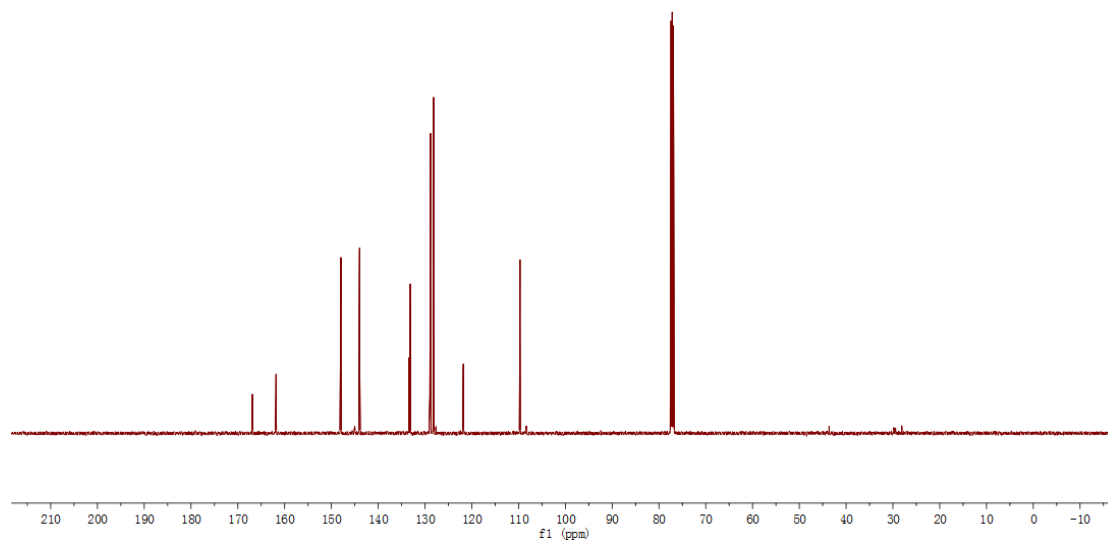

Supplementary Figure 100.  $^1\text{H}$  NMR Spectrum of 4al' (500MHz,  $\text{DMSO}-d_6$ )

JM-B16

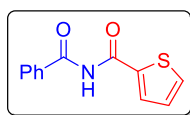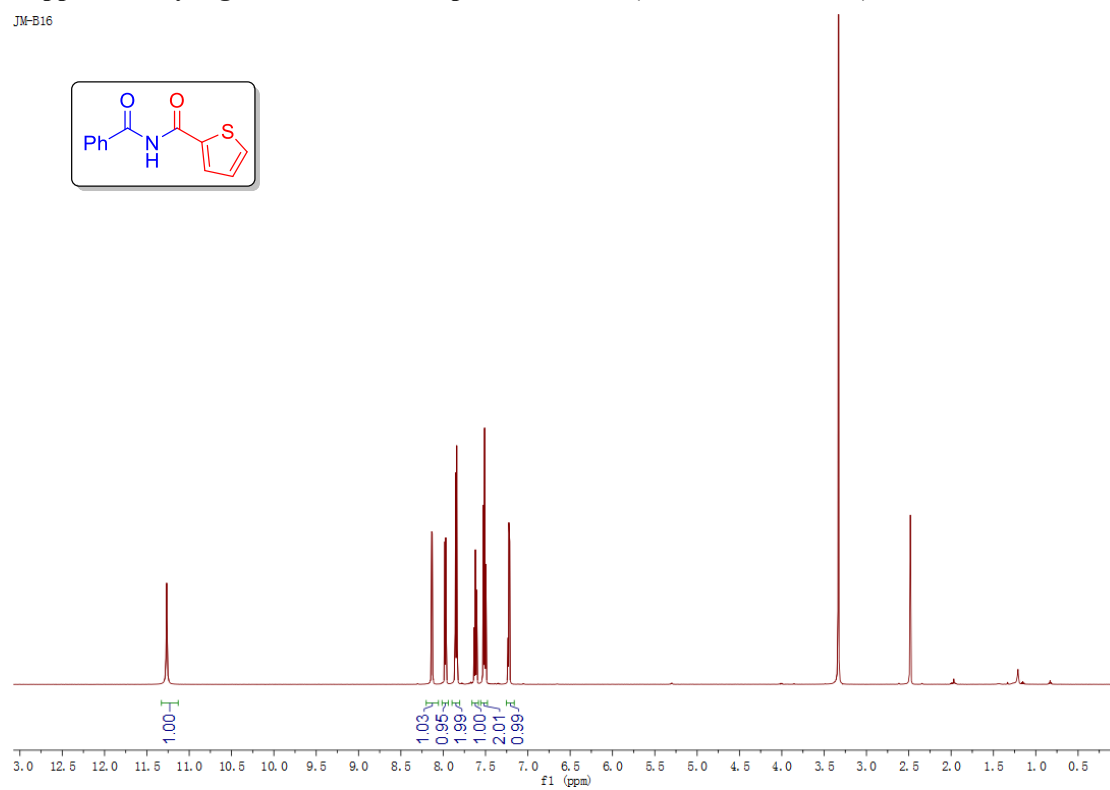

Supplementary Figure 101. <sup>1</sup>H NMR Spectrum of 4bb (500MHz, DMSO-d<sub>6</sub>)

JM-B6

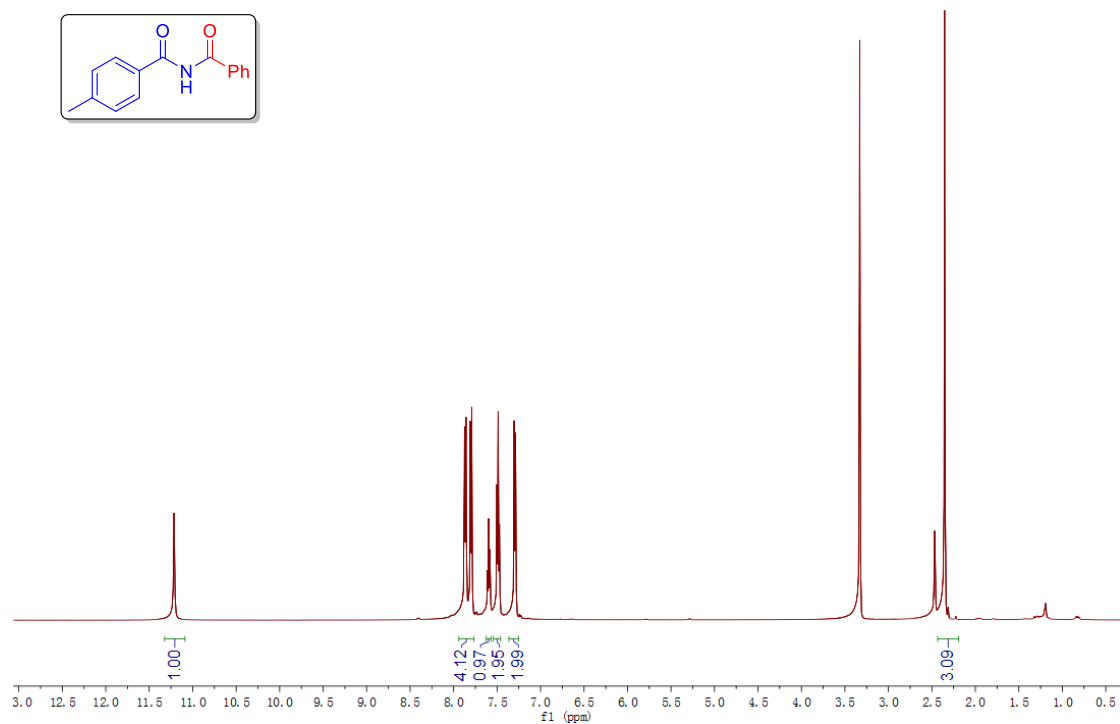

Supplementary Figure 102. <sup>1</sup>H NMR Spectrum of 4cb (500MHz, DMSO-d<sub>6</sub>)

JM-C32.1.fid

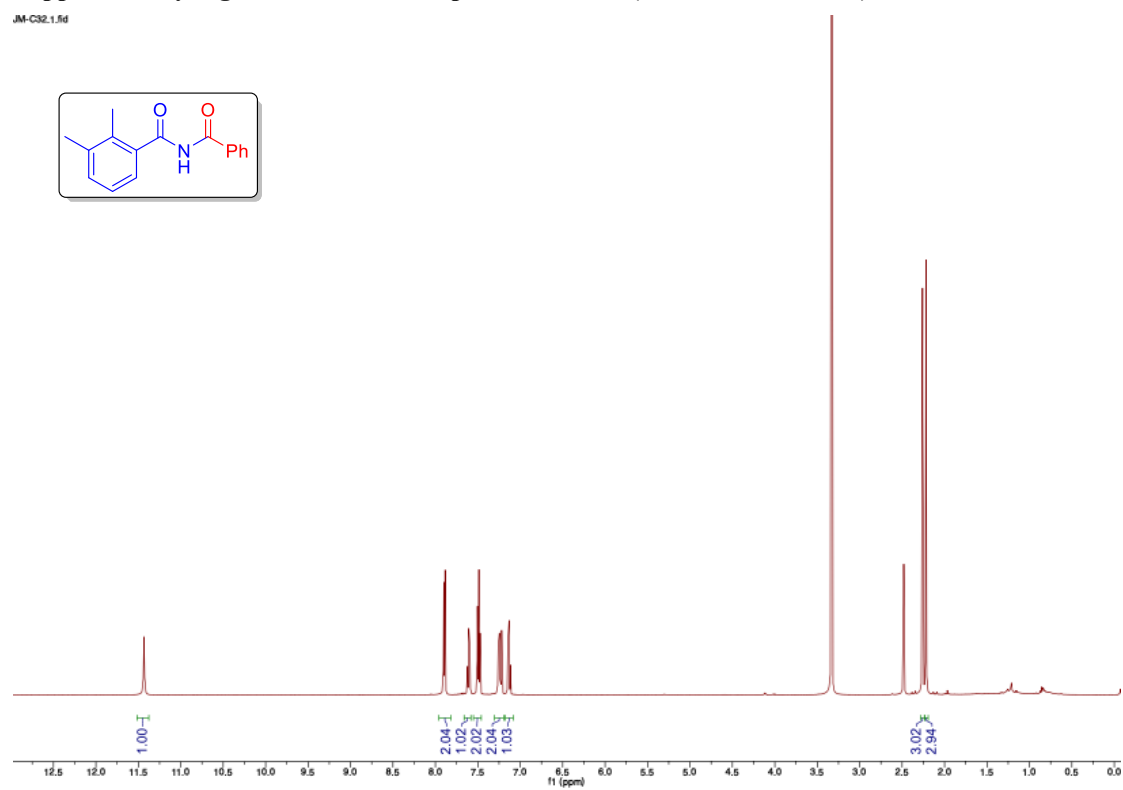

Supplementary Figure 103.  $^{13}\text{C}$  NMR Spectrum of 4cb (125MHz,  $\text{DMSO-}d_6$ )

JM-C32.2.fid

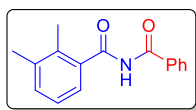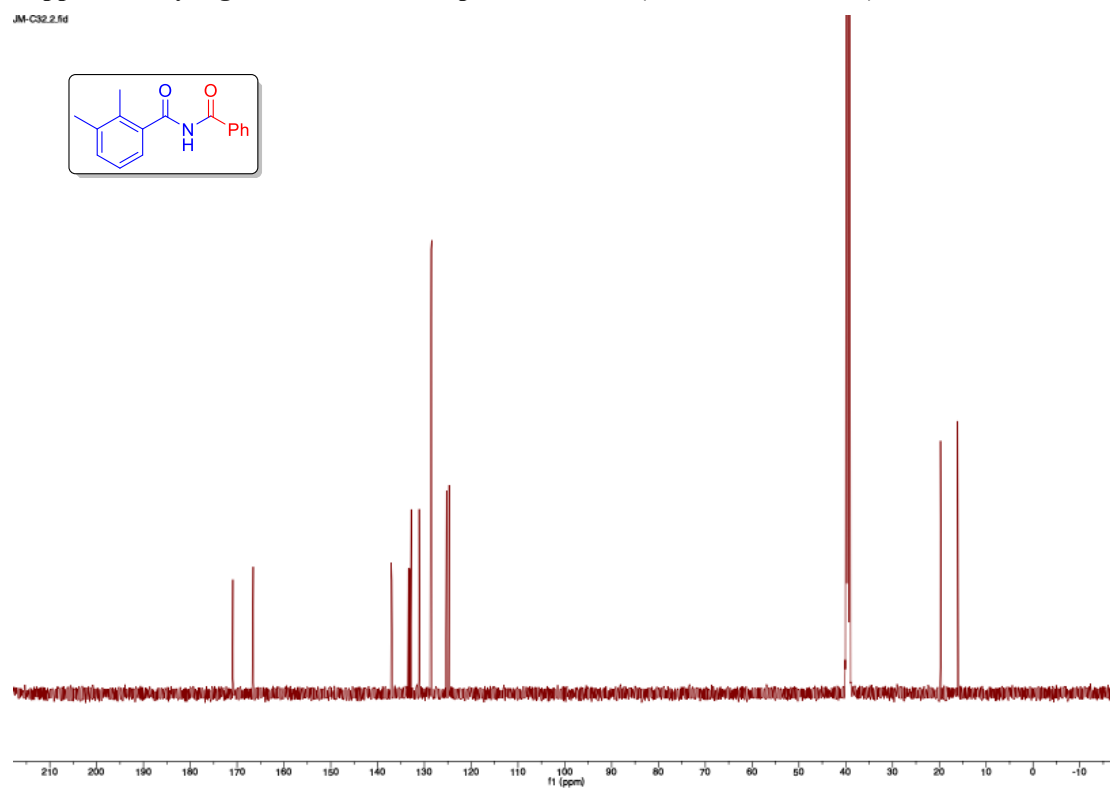

Supplementary Figure 104.  $^1\text{H}$  NMR Spectrum of 4db (500MHz,  $\text{DMSO-}d_6$ )

JM-B5

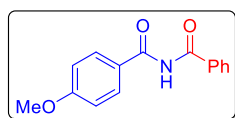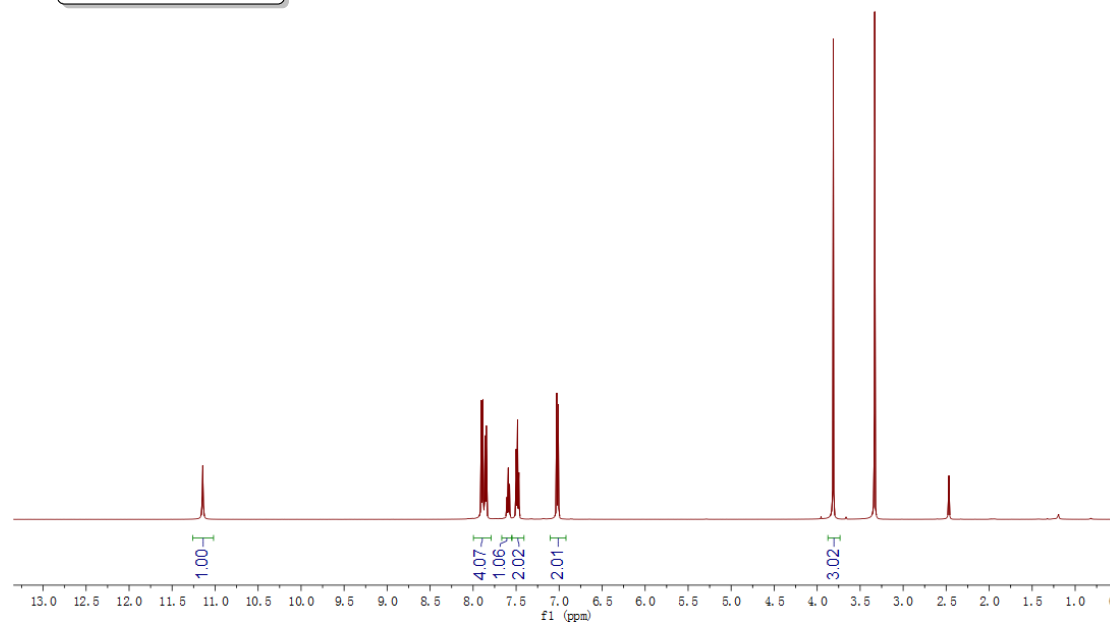



Supplementary Figure 105. <sup>1</sup>H NMR Spectrum of 4eb (500MHz, DMSO-d<sub>6</sub>)

JM-C33.1.fid

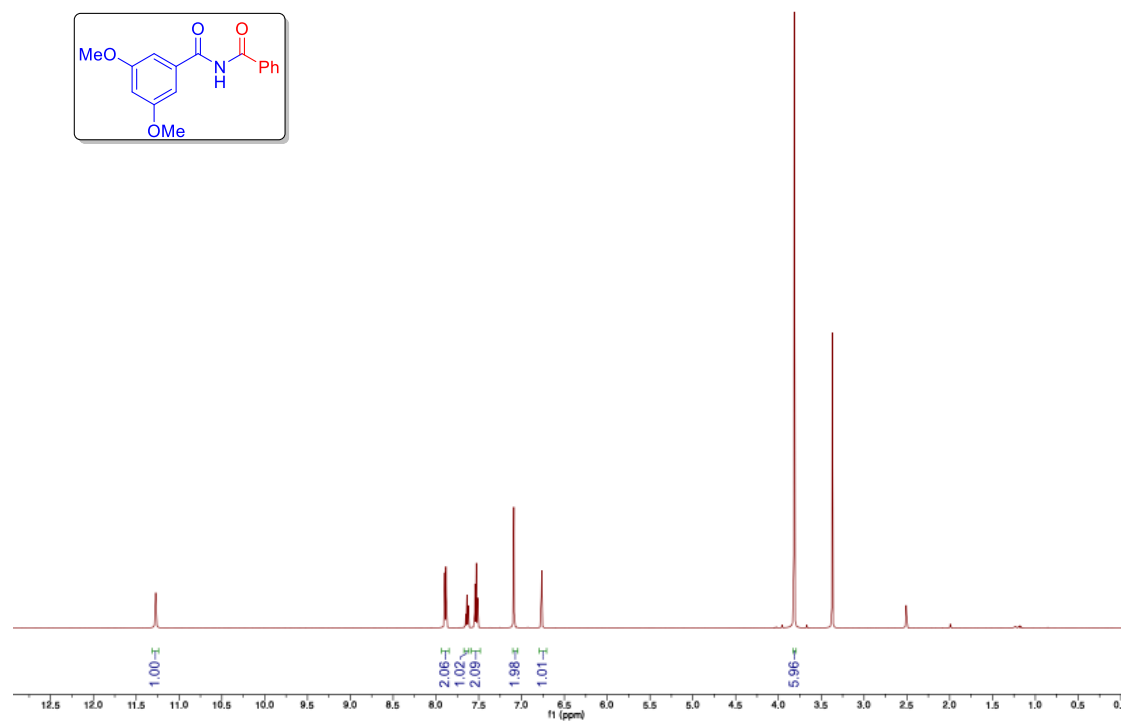

Supplementary Figure 106. <sup>13</sup>C NMR Spectrum of 4eb (125MHz, DMSO-d<sub>6</sub>)

JM-C33.2.fid

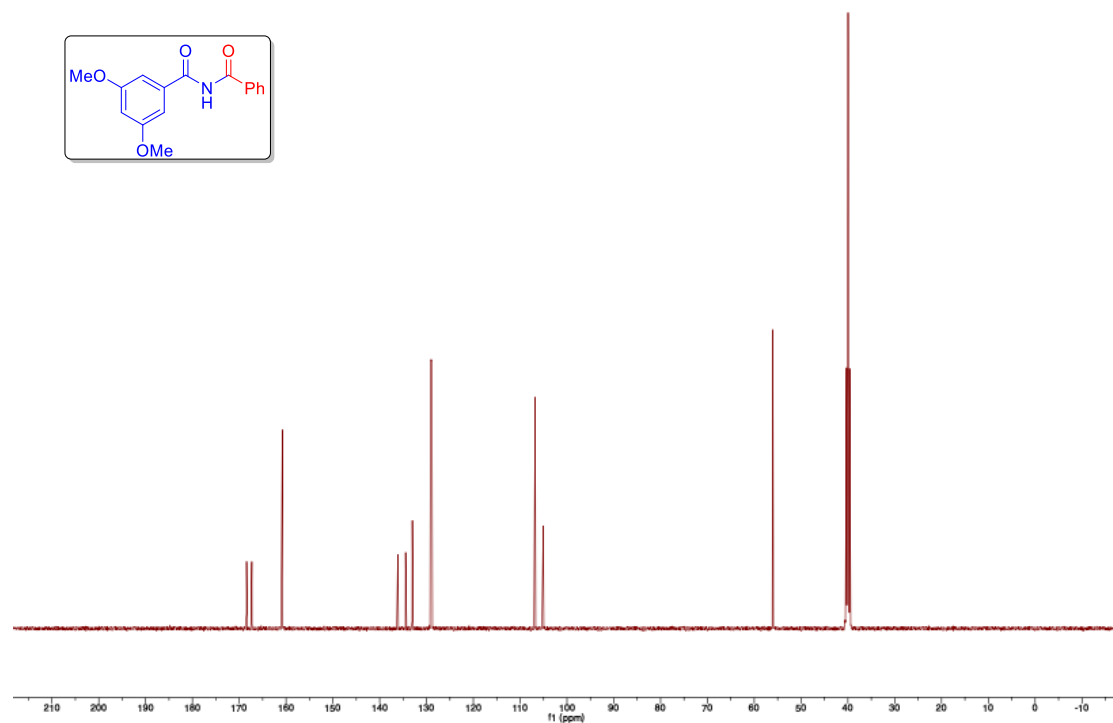

Supplementary Figure 107. <sup>1</sup>H NMR Spectrum of 4fb' (500MHz, DMSO-d<sub>6</sub>)

JM-B37.1.fid

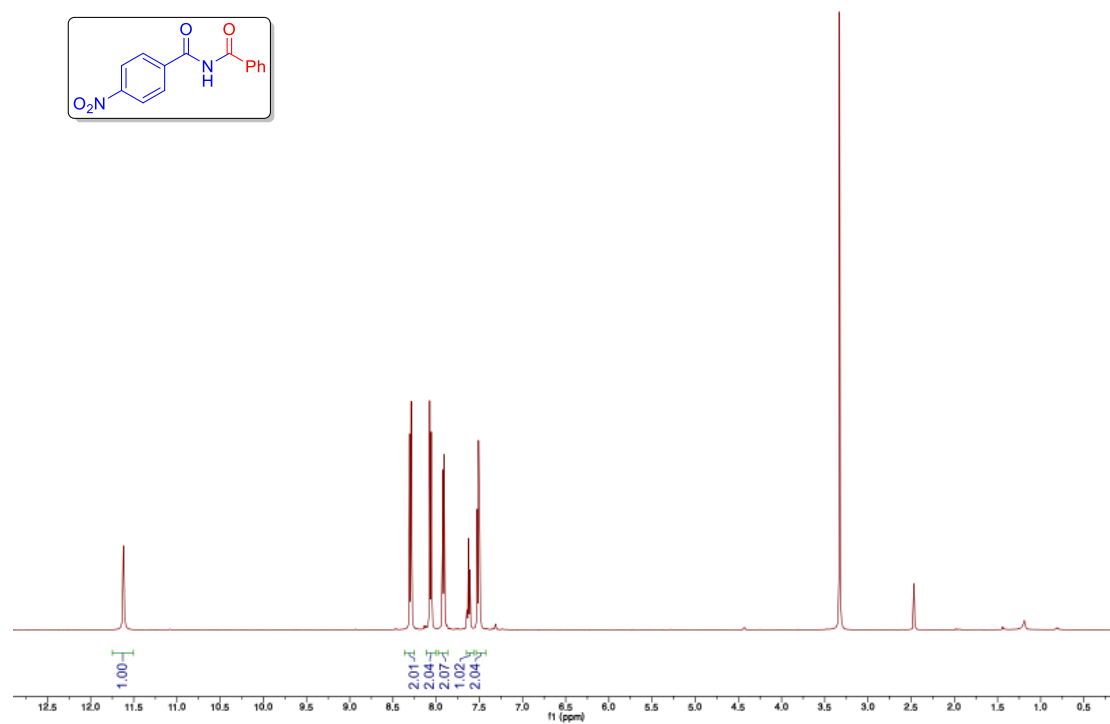

Supplementary Figure 108. <sup>1</sup>H NMR Spectrum of 4gb (500MHz, DMSO-d<sub>6</sub>)

JM-B4

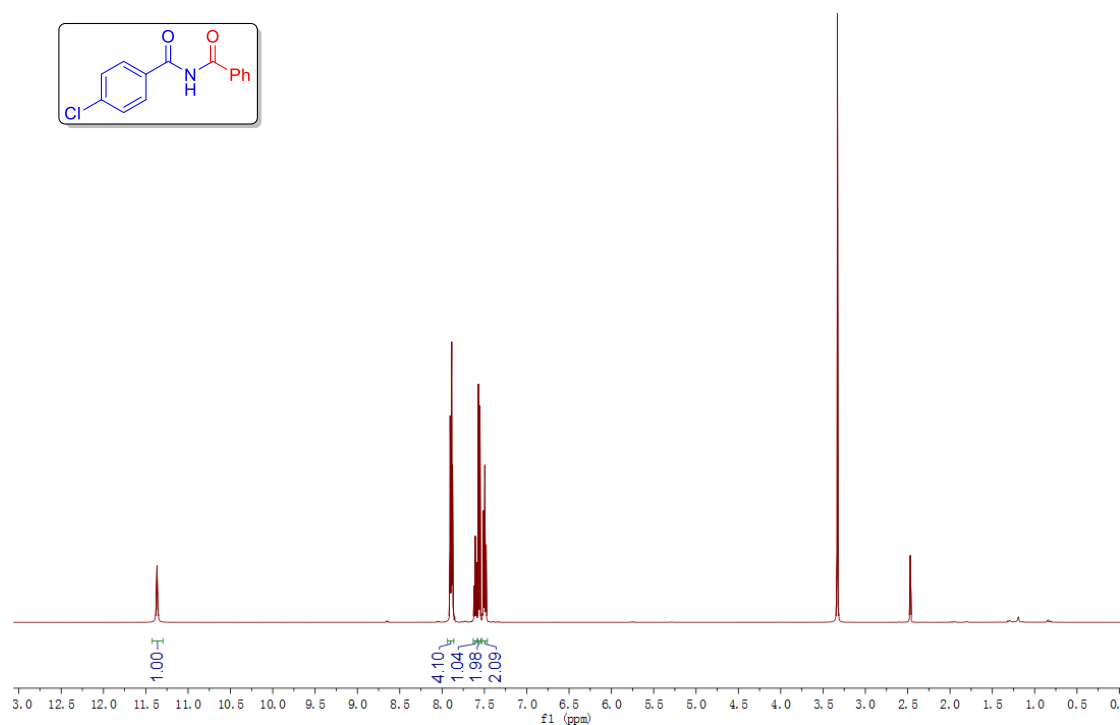

Supplementary Figure 109. <sup>1</sup>H NMR Spectrum of 4hb (500MHz, DMSO-d<sub>6</sub>)

JM-B9

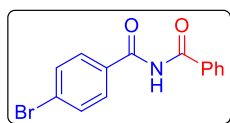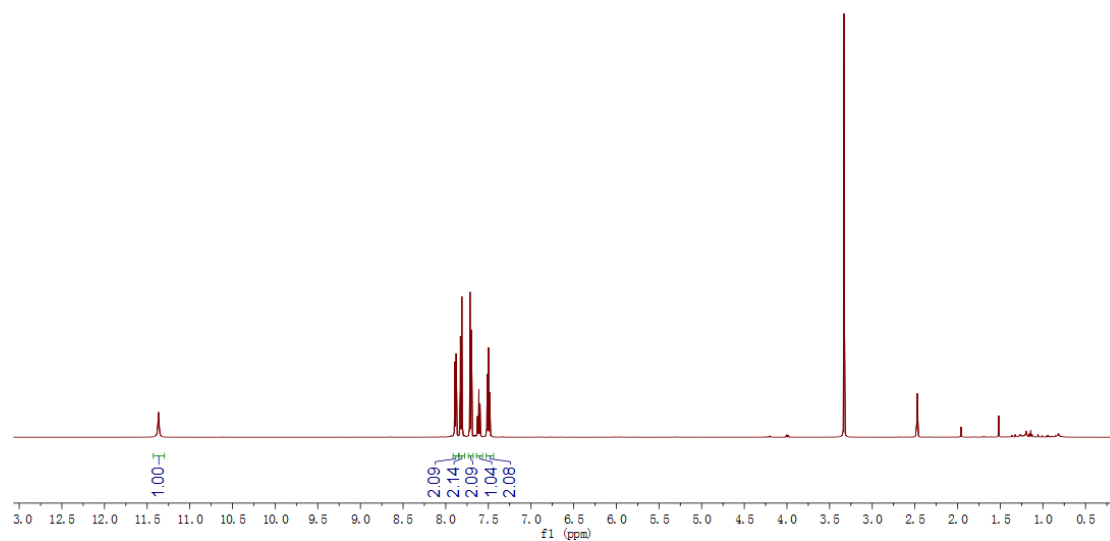

Supplementary Figure 110. <sup>1</sup>H NMR Spectrum of 4ib' (500MHz, DMSO-d<sub>6</sub>)

JM-B24

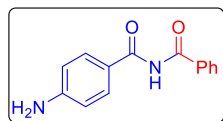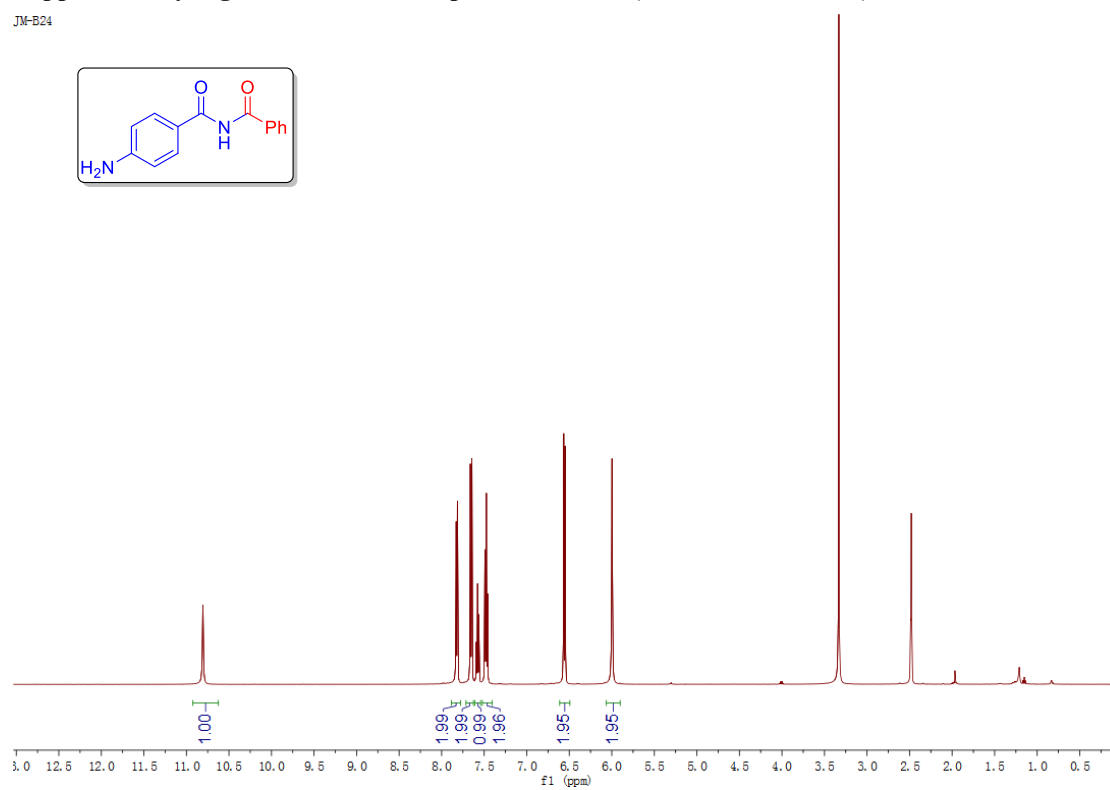

Supplementary Figure 111. <sup>1</sup>H NMR Spectrum of 4jb (500MHz, DMSO-d<sub>6</sub>)

JM-B15

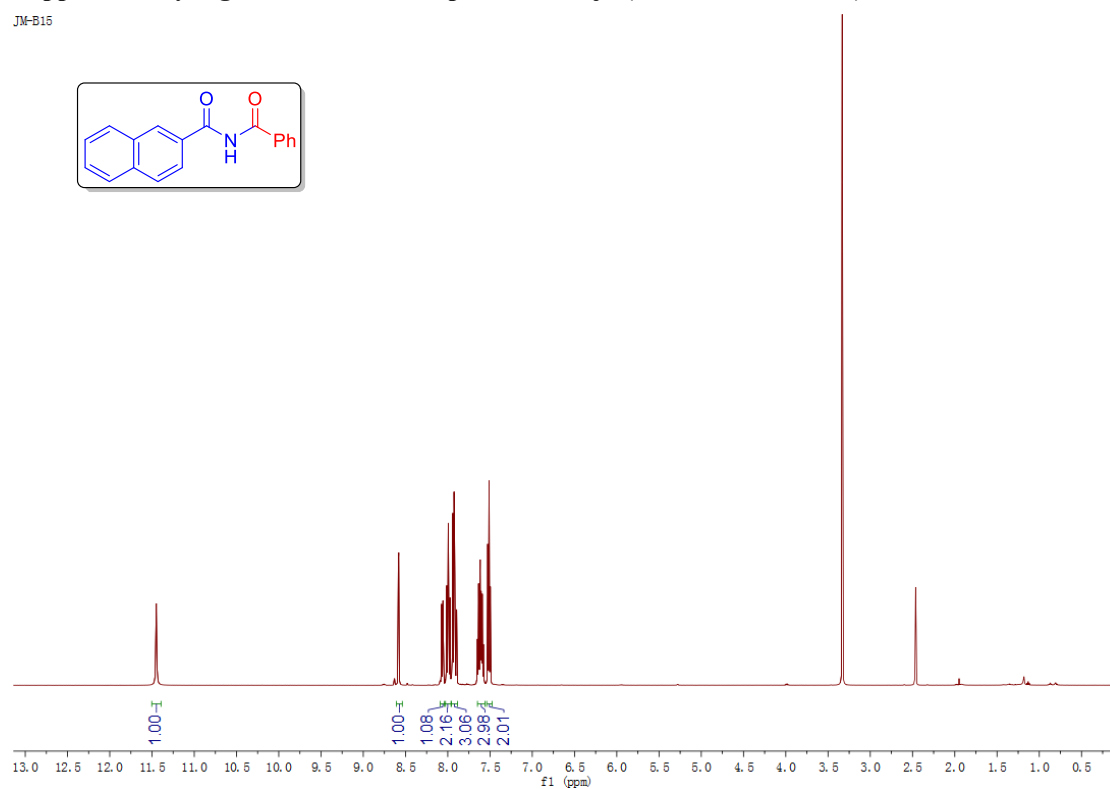

Supplementary Figure 112. <sup>1</sup>H NMR Spectrum of 4mb (500MHz, DMSO-d<sub>6</sub>)

JM-B10

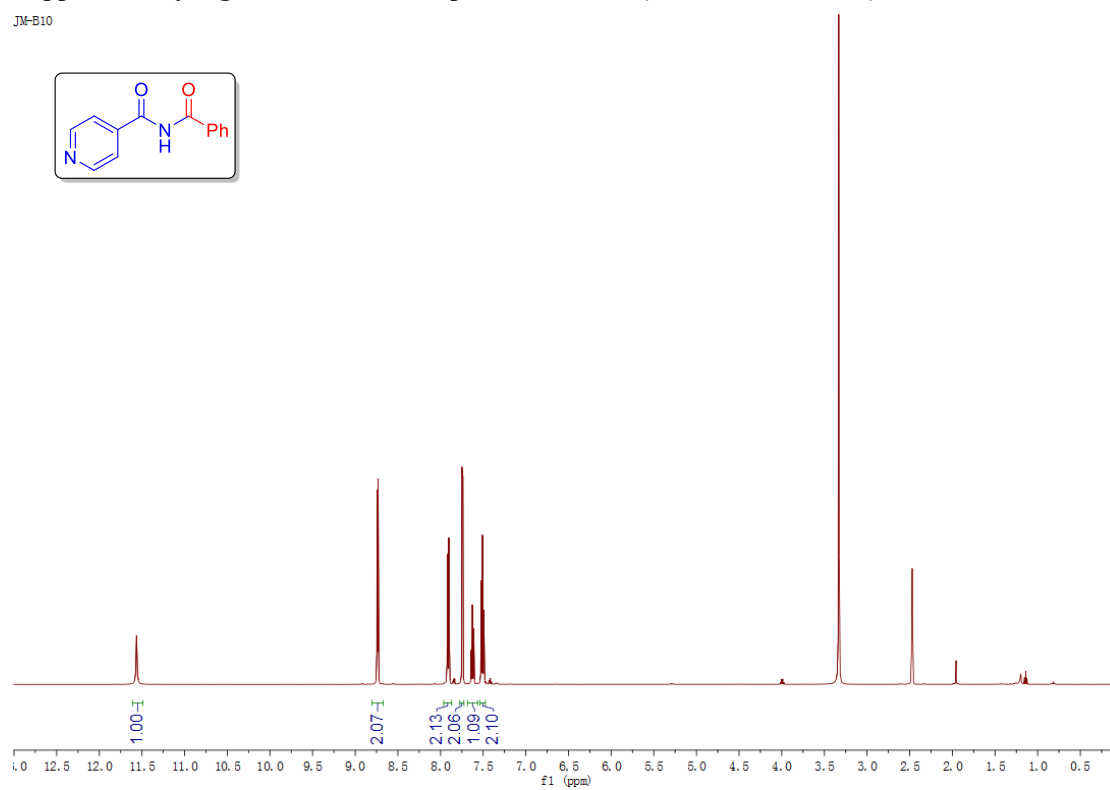

Supplementary Figure 113. <sup>1</sup>H NMR Spectrum of 4nb' (500MHz, DMSO-d<sub>6</sub>)

JM-B33

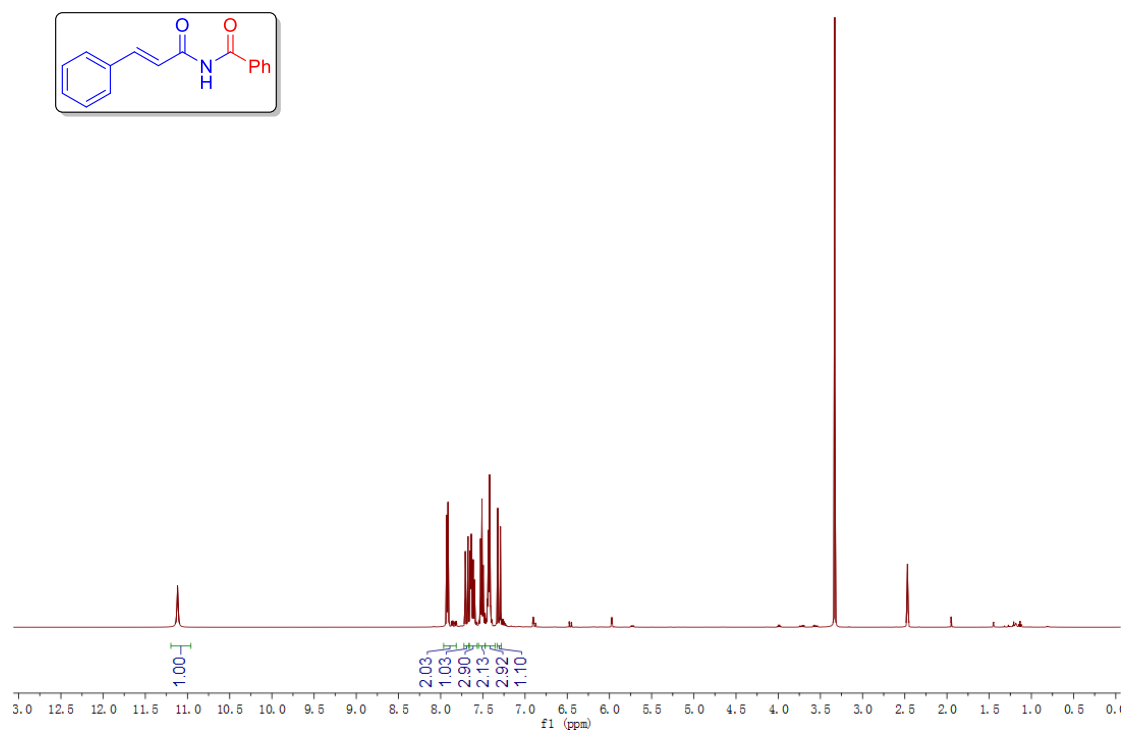

Supplement: d3qo00352c1.pdf [file d3qo00352c1.pdf]
